# Supplementary material for: Antimicrobial Peptide Induced-Stress Renders Staphylococcus aureus Susceptible to Toxic Nucleoside Analogs
Source: Front Immunol. 2020 Sep 29;11:1686. doi: 10.3389/fimmu.2020.01686 (PMC7550632; doi:10.3389/fimmu.2020.01686)
Supplement: Supplementary file 6 [file Table_2.xlsx]

## Sheet: BK76 Table
LOG2 C01	LOG2 C02	LOG2 C03	LOG2 C04	LOG2 C05	LOG2 C06	LOG2 eighthMIC01	LOG2 eighthMIC02	LOG2 eighthMIC03	LOG2 eighthMIC04	LOG2 eighthMIC05	LOG2 eighthMIC06	LOG2 halfMIC01	LOG2 halfMIC02	LOG2 halfMIC03	LOG2 halfMIC04	LOG2 halfMIC05	LOG2 halfMIC06	LOG2 MIC01	LOG2 MIC02	LOG2 MIC03	LOG2 MIC04	LOG2 MIC05	LOG2 MIC06	LOG2 quarterMIC01	LOG2 quarterMIC02	LOG2 quarterMIC03	LOG2 quarterMIC04	LOG2 quarterMIC05	LOG2 quarterMIC06	Only identified by site	Reverse	Potential contaminant	Student's T-test Significant eighthMIC_Ctrl	Student's T-test Significant quarterMIC_Ctrl	Student's T-test Significant halfMIC_Ctrl	Student's T-test Significant MIC_Ctrl	Student's T-test Significant quarterMIC_eighthMIC	Student's T-test Significant halfMIC_quarterMIC	Student's T-test Significant MIC_halfMIC	Student's T-test significant	Peptides	Razor + unique peptides	Unique peptides	Sequence coverage [%]	Unique + razor sequence coverage [%]	Unique sequence coverage [%]	Mol. weight [kDa]	Q-value	Score
28.6657	28.7055	28.6131	28.7747	28.7773	28.6583	29.3175	29.2324	29.3486	29.3377	29.3253	29.3754	28.9755	28.994	28.938	29.0514	28.9578	28.9891	28.9314	28.9291	28.933	28.99	29.0141	29.0006	29.0149	29.1653	29.1876	29.127	29.1081	29.0846				+	+	+	+	+			eighthMIC_Ctrl;halfMIC_Ctrl;MIC_Ctrl;quarterMIC_Ctrl;quarterMIC_eighthMIC	42	42	42	67.4	67.4	67.4	66.361	0	323.31
24.9253	24.3114	24.8236	24.201	23.9465	24.1295	21.5036	21.6529	21.4231	21.1619	21.8166	21.2022	20.4743	20.5559	20.9271	21.1797	20.8637	19.9701	21.0662	21.1723	20.9579	21.1894	20.7681	21.4355	21.1948	20.9172	20.8478	21.3397	20.6644	21.7611				+	+	+	+				eighthMIC_Ctrl;halfMIC_Ctrl;MIC_Ctrl;quarterMIC_Ctrl	3	3	3	51.9	51.9	51.9	8.871	0	7.0381
23.5519	23.6755	23.5839	23.6293	23.5613	23.4182	22.6408	22.9447	22.7464	22.604	22.8021	22.5357	22.4381	22.4362	22.5289	22.8208	22.5044	22.7055	22.4626	22.3192	22.5093	22.7113	22.271	22.7369	22.627	22.7512	22.5936	22.8569	22.6969	22.7507				+	+	+	+				eighthMIC_Ctrl;halfMIC_Ctrl;MIC_Ctrl;quarterMIC_Ctrl	5	5	5	57.2	57.2	57.2	15.992	0	102.92
28.4249	28.3321	28.4682	28.3686	28.3246	28.304	27.8622	27.819	28.011	27.9006	27.9245	27.8138	27.8929	28.001	28.0771	28.1718	27.9809	28.0792	27.9379	28.1066	28.0771	28.111	27.9655	28.2351	27.9821	27.977	27.8837	28.1065	27.8263	27.9975				+	+	+	+				eighthMIC_Ctrl;halfMIC_Ctrl;MIC_Ctrl;quarterMIC_Ctrl	14	14	14	55.9	55.9	55.9	31.992	0	225.91
24.3959	24.2877	24.4494	24.4619	24.4556	24.1659	25.0677	24.963	25.2236	25.1626	25.2441	25.2183	25.1111	25.1002	25.1834	25.3176	25.1161	25.2867	25.209	25.1701	25.0841	25.1616	25.1442	25.2061	25.1161	25.1525	25.2044	25.1284	25.2132	25.2055				+	+	+	+				eighthMIC_Ctrl;halfMIC_Ctrl;MIC_Ctrl;quarterMIC_Ctrl	11	11	11	25.5	25.5	25.5	68.713	0	50.849
24.5961	24.6906	24.9443	24.4822	24.1585	24.5205	22.6903	23.3483	22.9888	22.8505	22.8103	23.1994	22.3996	22.5166	22.4745	22.5412	22.3825	22.4673	22.4513	22.444	22.4583	21.9296	22.4818	22.4894	22.2278	21.9476	22.6291	23.3781	22.4641	22.5746				+	+	+	+				eighthMIC_Ctrl;halfMIC_Ctrl;MIC_Ctrl;quarterMIC_Ctrl	3	3	3	35	35	35	11.855	0	55.665
26.7774	26.7371	26.8614	26.8251	26.8953	26.9078	27.1809	27.1373	27.2611	27.1654	27.1955	27.2674	26.7669	26.7797	26.9775	26.9601	26.8728	26.7859	26.8593	26.9072	27.0193	27.1229	26.8247	26.9957	26.9673	27.0009	26.9178	27.0196	26.9527	26.9302				+	+		+	+			eighthMIC_Ctrl;MIC_Ctrl;quarterMIC_Ctrl;quarterMIC_eighthMIC	26	26	26	62.6	62.6	62.6	57.664	0	323.31
24.0089	24.2744	24.1641	24.2953	24.2784	24.2225	23.7402	23.5849	23.7312	23.6285	23.6881	23.7882	24.0559	23.9613	23.8069	23.8598	24.1416	24.1387	24.0995	23.8119	23.925	24.2342	24.2327	24.1398	23.6261	24.0414	24.1114	23.7757	24.0922	23.6973				+	+	+					eighthMIC_Ctrl;halfMIC_Ctrl;quarterMIC_Ctrl	7	7	7	68.4	68.4	68.4	18.655	0	110.53
25.9716	26.1101	25.9156	26.0581	26.0331	26.037	26.4404	26.3885	26.659	26.5736	26.6701	26.5025	25.9612	26.1228	26.2627	26.3483	26.1663	26.245	26.2314	26.1595	26.2018	26.3433	26.1288	26.2971	26.3612	26.3226	26.3859	26.3126	26.3463	26.4398				+	+	+	+				eighthMIC_Ctrl;halfMIC_Ctrl;MIC_Ctrl;quarterMIC_Ctrl	15	15	15	86.1	86.1	86.1	24.008	0	295.12
25.102	24.8548	25.1004	24.733	24.5927	24.5933	23.7463	23.7042	23.4616	23.5385	23.838	23.2156	22.9044	23.04	23.2648	23.5698	23.1681	23.1845	23.2744	23.1873	23.3613	23.3443	23.2141	23.5449	23.2156	23.2023	23.162	23.6267	23.3317	23.358				+	+	+	+				eighthMIC_Ctrl;halfMIC_Ctrl;MIC_Ctrl;quarterMIC_Ctrl	3	3	3	45.7	45.7	45.7	10.548	0	58.332
24.3215	23.873	24.0653	23.5411	23.5097	23.5801	21.9976	22.287	22.5781	22.1566	22.5238	22.1094	21.9016	21.6189	22.615	22.0281	22.5421	22.3367	22.3396	22.0422	21.6832	22.0482	22.3543	21.9783	22.6649	22.5429	22.2251	22.9565	21.8729	22.5147				+	+	+	+				eighthMIC_Ctrl;halfMIC_Ctrl;MIC_Ctrl;quarterMIC_Ctrl	3	3	3	50	50	50	8.7596	0	53.475
25.1077	25.2238	25.2892	25.523	25.5626	25.3357	26.0735	25.9627	25.9871	26.0908	26.2029	26.1203	26.2516	26.2564	26.0453	26.1809	26.2574	26.1887	26.1236	25.7229	25.9996	26.259	25.6977	25.4316	25.8927	26.1806	26.1913	26.137	26.1907	26.1516				+	+	+	+				eighthMIC_Ctrl;halfMIC_Ctrl;MIC_Ctrl;quarterMIC_Ctrl	16	16	16	70.2	70.2	70.2	26.656	0	150.41
25.0537	24.329	24.5566	23.4239	23.7376	23.7463	20.742	21.6254	21.5179	21.7171	21.8682	21.2238	21.0757	20.9679	19.8513	22.3033	21.561	21.498	21.3977	21.7995	22.2662	21.0184	21.9175	22.2727	21.7032	21.3867	20.5203	20.3416	21.1713	23.102				+	+	+	+				eighthMIC_Ctrl;halfMIC_Ctrl;MIC_Ctrl;quarterMIC_Ctrl	9	9	9	22.4	22.4	22.4	83.424	0	26.757
24.1224	24.316	24.1327	24.3558	24.3034	24.172	24.6445	24.612	24.7201	24.6166	24.733	24.6136	24.5473	24.6014	24.6874	24.8566	24.6948	24.7593	24.7355	24.5523	24.7271	24.7874	24.6887	24.8947	24.426	24.6318	24.8089	24.6453	24.6338	24.6663				+	+	+	+				eighthMIC_Ctrl;halfMIC_Ctrl;MIC_Ctrl;quarterMIC_Ctrl	15	15	15	38.2	38.2	38.2	58.512	0	105.97
27.4647	26.6234	27.0437	26.4265	26.1807	26.7913	24.9852	25.0489	25.1106	25.0477	25.1187	24.67	23.6767	24.1395	24.3917	24.5578	24.0955	24.0861	24.5062	24.7054	24.6419	24.1574	24.5541	24.8212	24.57	24.1387	24.0669	24.6987	24.2945	24.336				+	+	+	+	+			eighthMIC_Ctrl;halfMIC_Ctrl;MIC_Ctrl;quarterMIC_Ctrl;quarterMIC_eighthMIC	5	5	5	75	75	75	7.7886	0	118.31
27.3569	26.5852	27.0236	26.369	26.4199	26.5089	25.0995	25.1388	25.3113	25.1459	25.2622	24.7434	24.256	24.2768	24.6841	24.6754	24.382	24.383	24.5022	24.8534	24.9661	24.7965	24.496	24.9647	24.9193	24.3934	24.4131	25.0423	24.4876	24.6195				+	+	+	+				eighthMIC_Ctrl;halfMIC_Ctrl;MIC_Ctrl;quarterMIC_Ctrl	4	4	4	63.9	63.9	63.9	9.4065	0	52.749
22.8052	22.5251	22.8449	22.7096	22.6328	22.7288	23.4093	23.5835	23.4478	23.272	23.7844	23.7579	23.4826	23.2549	22.9794	23.1087	23.067	23.393	22.7701	22.6154	23.0564	22.694	22.5109	22.7987	23.4273	23.6761	23.5882	23.3407	23.772	23.448				+	+	+					eighthMIC_Ctrl;halfMIC_Ctrl;quarterMIC_Ctrl	4	4	4	35.4	35.4	35.4	24.581	0	42.171
26.7229	26.5022	26.8097	26.2258	26.0336	26.5257	25.2601	25.2963	25.4087	25.1752	25.3042	24.8495	24.7044	24.797	24.9602	25.1367	24.8289	25.0158	24.7366	24.7149	25.0164	24.8652	24.8413	25.2551	24.9825	24.7369	24.8233	25.2636	24.7207	25.0206				+	+	+	+				eighthMIC_Ctrl;halfMIC_Ctrl;MIC_Ctrl;quarterMIC_Ctrl	4	4	4	70	70	70	8.7409	0	188.16
29.2839	29.2235	29.2043	29.1998	29.209	29.078	29.4356	29.4296	29.5325	29.5064	29.4643	29.4694	29.4329	29.3299	29.1515	29.0792	29.3763	29.4026	29.2157	29.1107	29.137	29.2565	29.0404	29.3954	29.4618	29.5543	29.5134	29.5061	29.5265	29.4719				+	+						eighthMIC_Ctrl;quarterMIC_Ctrl	14	14	14	74.7	74.7	74.7	19.786	0	252.5
24.0421	24.18	24.1703	24.0907	24.0088	23.867	23.4418	23.5934	23.7039	23.562	23.5088	23.5277	23.521	23.5322	23.2458	23.4563	23.4126	23.6427	23.7066	23.7437	23.2953	23.2167	23.6507	23.6935	23.0535	23.6316	23.5923	23.4009	23.6597	23.6252				+	+	+	+				eighthMIC_Ctrl;halfMIC_Ctrl;MIC_Ctrl;quarterMIC_Ctrl	9	9	9	74.4	74.4	74.4	18.581	0	119.36
26.3539	26.3236	26.2559	26.4261	26.4113	26.3279	26.0174	25.9757	26.1294	26.021	26.116	25.9961	26.0599	26.0973	26.1215	26.3501	26.199	26.243	26.155	26.0171	26.2096	26.1986	26.0927	26.2251	25.9886	26.0138	26.0609	26.1451	25.9578	26.0973				+	+	+	+				eighthMIC_Ctrl;halfMIC_Ctrl;MIC_Ctrl;quarterMIC_Ctrl	9	9	9	83	83	83	18.632	0	111.43
25.2419	24.885	24.9704	24.982	24.9366	25.0292	24.4111	24.4435	24.6346	24.4082	24.5456	24.4655	24.6376	24.463	24.7667	24.838	24.6445	24.5965	24.7317	24.8829	24.9922	24.9603	24.7613	24.91	24.7139	24.6342	24.6767	24.7802	24.548	24.6994				+	+	+	+				eighthMIC_Ctrl;halfMIC_Ctrl;MIC_Ctrl;quarterMIC_Ctrl	4	4	4	30.6	30.6	30.6	23.362	0	48.193
24.0583	23.9488	23.6241	23.6449	23.6633	23.6481	22.9359	23.0979	23.1162	23.1807	23.0149	23.0216	22.8404	22.9472	23.1684	23.3135	23.0154	23.2242	23.4578	23.1648	23.1638	23.4265	23.6782	23.6015	23.0593	22.8845	23.0012	23.3748	23.0538	23.0983				+	+	+	+				eighthMIC_Ctrl;halfMIC_Ctrl;MIC_Ctrl;quarterMIC_Ctrl	14	14	14	30.7	30.7	30.7	86.459	0	98.695
27.3683	26.5846	27.0239	26.4983	26.1516	26.5172	25.1471	25.3415	25.2534	25.1022	25.1226	24.8924	24.9154	25.003	25.2611	25.2673	24.9592	25.0835	25.1399	25.2442	25.3655	24.6129	25.1671	25.462	25.2238	24.9434	24.9066	25.161	25.0478	25.0096				+	+	+	+				eighthMIC_Ctrl;halfMIC_Ctrl;MIC_Ctrl;quarterMIC_Ctrl	14	14	14	38.2	38.2	38.2	56.436	0	294.84
23.5224	23.6134	23.4144	23.5271	23.6797	23.7615	24.209	24.0322	24.1896	24.1718	24.2834	23.9935	24.213	24.2969	24.1917	24.4884	24.3151	24.3227	24.1174	24.1676	24.1215	24.8133	24.2359	24.2527	24.0068	24.4009	24.1672	24.1903	24.1445	24.2658				+	+	+	+				eighthMIC_Ctrl;halfMIC_Ctrl;MIC_Ctrl;quarterMIC_Ctrl	6	6	6	12.2	12.2	12.2	74.415	0	54.721
26.5233	25.7777	26.1895	25.6738	25.3852	25.8596	24.2962	24.4687	24.5757	24.3692	24.4422	23.9053	23.9539	24.0189	24.3178	24.4671	24.0751	24.0139	24.2824	24.4103	24.539	24.6383	24.4797	24.5784	24.5408	23.9064	24.1745	24.6241	24.039	24.3861				+	+	+	+				eighthMIC_Ctrl;halfMIC_Ctrl;MIC_Ctrl;quarterMIC_Ctrl	33	33	30	40.1	40.1	37.2	146.09	0	323.31
27.7095	27.5679	27.765	27.5574	27.4175	27.6225	26.8246	27.0256	27.0705	27.1674	27.1416	27.0062	26.9214	27.0425	26.865	27.0002	26.8436	27.0841	27.1855	26.9295	27.1235	26.9774	27.2094	27.0815	26.9965	26.8666	27.01	27.2806	26.9687	27.2774				+	+	+	+				eighthMIC_Ctrl;halfMIC_Ctrl;MIC_Ctrl;quarterMIC_Ctrl	12	12	12	71.5	71.5	71.5	15.226	0	180.69
23.1657	22.5345	22.9628	22.2472	22.2135	21.9489	20.2319	21.0068	20.8428	20.1575	20.8377	20.7647	20.824	21.1366	20.4998	20.954	19.781	19.4032	20.7465	20.8788	21.1555	21.1345	20.3337	20.8993	20.2	20.8319	20.9577	21.0659	20.5582	20.7587				+	+	+	+				eighthMIC_Ctrl;halfMIC_Ctrl;MIC_Ctrl;quarterMIC_Ctrl	5	5	4	9	9	6.5	111.78	0	25.453
29.1315	29.0181	29.173	29.0192	28.8084	29.1661	28.3517	28.5291	28.4272	28.4152	28.52	28.0977	27.5097	27.8295	27.9231	27.9137	27.6974	27.755	27.8751	27.8547	27.7181	27.7938	27.2216	27.8805	27.7649	27.731	27.8317	28.0911	27.8189	28.1196				+	+	+	+	+			eighthMIC_Ctrl;halfMIC_Ctrl;MIC_Ctrl;quarterMIC_Ctrl;quarterMIC_eighthMIC	10	10	10	88.5	88.5	88.5	11.44	0	133.35
26.1775	25.636	25.875	25.4509	25.0643	25.6237	24.4416	24.438	24.333	24.1746	24.2441	23.8066	24.1234	24.3655	24.3625	24.3258	24.461	24.3851	24.6968	24.7068	24.5485	24.7307	24.5007	24.8751	24.5873	24.122	24.3024	24.5165	24.2689	24.3595				+	+	+	+			+	eighthMIC_Ctrl;halfMIC_Ctrl;MIC_Ctrl;MIC_halfMIC;quarterMIC_Ctrl	8	8	8	33.2	33.2	33.2	35.835	0	106.42
25.3876	25.2588	25.4967	25.3222	25.0238	25.2744	23.8163	24.1956	24.4764	24.4022	24.3028	23.6487	23.6493	23.6249	23.8201	23.8586	23.8275	23.9996	23.6795	23.5613	23.8473	23.9341	23.6844	24.1428	23.6721	23.4338	23.704	24.2133	23.6315	24.0266				+	+	+	+				eighthMIC_Ctrl;halfMIC_Ctrl;MIC_Ctrl;quarterMIC_Ctrl	4	4	4	70.9	70.9	70.9	11.344	0	11.369
22.77	23.0961	22.6873	23.0874	23.114	22.9336	22.1107	22.3063	22.414	22.3028	22.2549	22.3574	22.6551	22.5886	22.4213	22.6892	22.3931	22.6866	22.7317	22.7416	22.9067	22.7615	22.9944	22.8968	22.4344	22.698	22.3873	22.0767	22.4982	22.7318				+	+	+					eighthMIC_Ctrl;halfMIC_Ctrl;quarterMIC_Ctrl	5	5	5	39.3	39.3	39.3	19.579	0	27.37
24.9127	24.8562	24.7154	24.9023	24.5003	24.7944	24.2325	24.2876	24.1493	24.1398	24.2731	23.971	23.6238	24.1853	23.8609	24.0025	24.0575	24.1867	24.3286	24.4344	24.19	24.4524	24.1864	24.5036	24.1867	23.9648	23.4986	24.1247	23.7728	24.135				+	+	+	+				eighthMIC_Ctrl;halfMIC_Ctrl;MIC_Ctrl;quarterMIC_Ctrl	6	6	6	65.5	65.5	65.5	13.515	0	87.689
27.146	27.288	27.0512	27.1401	27.2282	27.2435	27.4633	27.7347	27.5581	27.7217	27.7008	27.8162	27.4713	27.4615	27.3128	27.4445	27.402	27.4477	27.4092	27.2334	27.2601	27.328	27.1081	27.2115	27.7628	27.5257	27.558	27.7081	27.5892	27.7754				+	+	+					eighthMIC_Ctrl;halfMIC_Ctrl;quarterMIC_Ctrl	13	13	13	69.9	69.9	69.9	18.002	0	310.38
22.8643	23.2014	23.0499	22.8976	23.064	23.0137	23.405	23.5072	23.4362	23.6681	23.7022	23.5659	23.624	23.5244	23.6081	23.7927	23.6127	23.6616	23.5694	23.4681	23.6243	23.6523	23.3838	23.5797	23.4536	23.5312	23.5315	23.5043	23.5185	23.5588				+	+	+	+				eighthMIC_Ctrl;halfMIC_Ctrl;MIC_Ctrl;quarterMIC_Ctrl	12	12	12	44.9	44.9	44.9	40.105	0	36.965
30.5442	29.9713	30.2893	29.8316	29.5813	29.9417	28.7993	28.9507	28.949	28.7643	28.9538	28.4525	28.5236	28.6581	28.7569	29.0326	28.7021	28.782	28.994	29.0402	29.147	29.0513	28.7705	29.0657	29.0222	28.5904	28.669	29.0857	28.5783	28.8481				+	+	+	+				eighthMIC_Ctrl;halfMIC_Ctrl;MIC_Ctrl;quarterMIC_Ctrl	64	64	64	67.4	67.4	67.4	137.38	0	323.31
22.5819	22.2093	22.3717	22.417	22.3878	22.1417	21.6797	21.4702	21.8525	21.8323	21.4852	21.5215	21.7491	21.6885	21.4679	21.9777	21.6597	21.5955	21.5304	22.036	21.8285	21.0021	21.8706	20.2516	21.2866	21.6471	21.5327	19.3872	20.901	21.7584				+	+	+	+				eighthMIC_Ctrl;halfMIC_Ctrl;MIC_Ctrl;quarterMIC_Ctrl	4	4	4	19.2	19.2	19.2	32.694	0	19.179
24.3104	24.6477	24.5328	24.6932	24.6221	24.5958	25.03	24.9146	25.1041	25.0741	25.1504	25.0148	24.9469	24.9788	25.0513	24.983	25.0341	24.9792	25.0036	25.0068	24.9519	25.1654	24.9914	24.9144	24.8798	25.262	25.1206	24.9886	25.1258	24.9083				+	+	+	+				eighthMIC_Ctrl;halfMIC_Ctrl;MIC_Ctrl;quarterMIC_Ctrl	21	21	21	24.6	24.6	24.6	117.18	0	92.765
24.7755	25.0365	24.9215	25.0706	25.0559	24.8617	25.5094	25.2357	25.6425	25.5769	25.5764	25.553	25.163	25.11	25.2212	25.2843	25.06	25.253	25.2703	25.1902	25.1413	25.3621	25.2651	25.2562	25.1057	25.3382	25.3895	25.22	25.4067	25.3318				+	+	+	+				eighthMIC_Ctrl;halfMIC_Ctrl;MIC_Ctrl;quarterMIC_Ctrl	28	26	26	43.6	41.2	41.2	98.33	0	323.31
28.4163	27.6781	28.0648	27.5176	27.2362	27.5771	26.2091	26.4695	26.6486	26.3459	26.3603	26.1083	25.7921	25.9222	26.1059	26.2073	25.8733	25.9297	26.1499	26.4729	26.3894	26.1723	25.8874	26.3954	26.4451	25.9998	26.0056	26.4825	25.9591	26.3112				+	+	+	+				eighthMIC_Ctrl;halfMIC_Ctrl;MIC_Ctrl;quarterMIC_Ctrl	15	15	15	24.1	24.1	24.1	96.446	0	241.88
22.88	22.7071	22.9182	22.8126	22.5748	22.3146	21.4662	21.6275	21.8286	21.827	21.1168	21.8443	21.9231	21.596	21.8559	21.76	21.6446	21.8162	22.0159	22.1839	22.0866	22.0021	22.2428	21.997	21.8819	21.8051	21.812	21.9993	22.0401	21.8889				+	+	+	+			+	eighthMIC_Ctrl;halfMIC_Ctrl;MIC_Ctrl;MIC_halfMIC;quarterMIC_Ctrl	8	8	8	41.9	41.9	41.9	32.196	0	36.199
28.7783	28.7658	29.0268	28.9207	28.941	28.787	29.2505	29.2817	29.2422	29.4511	29.3395	29.5825	29.2402	29.4293	29.1227	29.4554	29.257	29.4096	28.7398	29.0397	29.204	29.0695	28.9531	28.9618	29.489	29.1038	29.2363	29.5071	29.2482	29.4191				+	+	+					eighthMIC_Ctrl;halfMIC_Ctrl;quarterMIC_Ctrl	20	20	20	60.3	60.3	60.3	30.155	0	175.52
25.7319	25.9037	25.606	25.8323	25.767	25.7648	25.4578	25.3319	25.4934	25.4081	25.4932	25.3598	25.5968	25.5369	25.5652	25.6625	25.4908	25.5283	25.5355	25.5843	25.7534	25.7206	25.675	25.7444	25.5262	25.5104	25.4859	25.4464	25.5805	25.45				+	+	+					eighthMIC_Ctrl;halfMIC_Ctrl;quarterMIC_Ctrl	18	18	18	81.5	81.5	81.5	31.006	0	139.43
24.7881	23.9529	24.4163	23.8399	23.4752	23.808	21.8679	22.793	22.4156	21.8155	22.4935	21.5516	21.2782	21.5571	21.7788	22.5946	22.1619	21.8409	22.5033	22.2559	22.8288	22.142	21.7818	22.1271	22.6375	22.075	22.1721	22.4561	22.03	22.0709				+	+	+	+				eighthMIC_Ctrl;halfMIC_Ctrl;MIC_Ctrl;quarterMIC_Ctrl	9	9	9	21.8	21.8	21.8	178.52	0	47.893
31.6716	30.8033	31.2056	30.6303	30.4979	30.7989	29.6584	29.7997	29.6391	29.5322	29.8271	29.3723	28.72	29.0856	29.2528	29.3855	29.0043	28.9147	29.2861	29.5973	29.5279	29.2448	29.2401	29.8353	29.6103	29.1398	28.9672	29.6204	29.0278	29.1729				+	+	+	+				eighthMIC_Ctrl;halfMIC_Ctrl;MIC_Ctrl;quarterMIC_Ctrl	5	5	5	80.3	80.3	80.3	7.321	0	77.739
28.9814	29.0954	29.304	28.908	29.0168	29.0224	29.4245	29.7012	29.5301	29.5848	29.4324	29.6899	29.0511	29.387	29.1082	28.7881	29.2429	29.0527	29.0968	29.0367	29.0006	28.9857	28.51	28.8784	29.866	29.2995	29.1639	29.5837	29.1431	29.5241				+	+						eighthMIC_Ctrl;quarterMIC_Ctrl	16	16	16	74.7	74.7	74.7	17.742	0	125.42
28.8466	28.9413	28.8339	28.9124	28.9276	28.7467	29.1264	29.0447	29.2568	29.218	29.1847	29.2771	29.273	29.2257	29.1015	29.1709	29.1434	29.2624	29.146	29.1846	29.2261	29.119	29.1041	29.1767	29.3146	29.2209	29.2223	29.1834	29.2496	29.247				+	+	+	+				eighthMIC_Ctrl;halfMIC_Ctrl;MIC_Ctrl;quarterMIC_Ctrl	30	30	30	78.8	78.8	78.8	32.494	0	323.31
25.922	25.2756	25.8981	25.1634	25.1428	25.2672	24.1825	24.5028	24.4941	24.2312	24.4633	24.2631	23.9251	24.0787	24.1365	24.451	24.01	24.0201	24.3491	24.2922	24.5032	24.5206	24.192	24.4144	24.3436	24.1793	24.0945	24.5144	24.0947	24.2245				+	+	+	+				eighthMIC_Ctrl;halfMIC_Ctrl;MIC_Ctrl;quarterMIC_Ctrl	8	8	8	53.8	53.8	53.8	11.173	0	22.942
27.1756	26.3522	26.8275	26.2633	26.1204	26.352	25.1449	25.3691	25.4754	25.2648	25.3821	24.8752	24.5695	24.6973	24.9787	25.0809	24.7275	24.8357	24.9289	25.0084	25.1279	25.0428	24.8236	25.0959	25.1142	24.5846	24.8962	25.1538	24.7747	25.1384				+	+	+	+				eighthMIC_Ctrl;halfMIC_Ctrl;MIC_Ctrl;quarterMIC_Ctrl	20	20	20	38.2	38.2	38.2	93.593	0	323.31
24.1179	23.6682	23.5747	23.5304	23.3629	23.4051	22.6884	22.5695	22.7722	22.8901	22.9455	22.522	22.857	22.8381	22.8351	23.2887	22.9756	23.2439	23.128	22.9084	22.9577	22.9642	23.2359	23.1227	22.4694	22.9508	22.6996	22.8387	22.8319	23.0248				+	+	+	+				eighthMIC_Ctrl;halfMIC_Ctrl;MIC_Ctrl;quarterMIC_Ctrl	20	20	20	20.5	20.5	20.5	162.46	0	23.78
23.4551	22.7854	23.2164	22.6311	21.1123	22.2027	19.719	20.3489	20.6552	19.7838	20.0767	19.6974	19.394	19.1292	20.1177	19.8211	20.209	19.9906	19.6552	20.9633	20.9477	19.7885	20.5174	20.5902	20.7611	20.1043	19.1153	19.8961	19.4428	19.8264				+	+	+	+				eighthMIC_Ctrl;halfMIC_Ctrl;MIC_Ctrl;quarterMIC_Ctrl	3	3	3	44.4	44.4	44.4	6.3941	0	28.546
26.8906	26.8806	26.7617	26.9658	27.0407	26.9817	27.3221	27.1058	27.3714	27.3977	27.3523	27.4252	26.9583	27.0204	27.0191	27.0326	27.0278	27.0935	27.0492	26.9978	27.1298	27.2366	27.0103	27.1852	26.994	27.1141	27.2043	27.0361	27.2123	27.173				+	+	+	+				eighthMIC_Ctrl;halfMIC_Ctrl;MIC_Ctrl;quarterMIC_Ctrl	46	46	44	60.8	60.8	58.2	91.036	0	323.31
27.997	27.4425	27.5707	27.3387	27.1663	27.62	26.6338	26.6955	26.7209	26.5976	26.9022	26.5291	26.1291	26.2439	26.3764	26.4646	26.1435	26.2575	26.2948	25.9806	26.2668	26.5739	26.1483	26.3681	26.4106	26.1918	26.3094	26.6703	26.2756	26.367				+	+	+	+				eighthMIC_Ctrl;halfMIC_Ctrl;MIC_Ctrl;quarterMIC_Ctrl	9	9	9	90.9	90.9	90.9	11.324	0	176.17
28.1069	27.5878	27.9071	27.408	27.3413	27.5129	26.6203	26.7844	26.8442	26.7242	26.8491	26.379	26.1218	26.0722	26.4243	26.4093	26.3422	26.3608	26.1965	26.3891	26.3596	26.4594	26.3164	26.4708	26.3504	26.2019	26.5062	26.5603	26.4032	26.6253				+	+	+	+				eighthMIC_Ctrl;halfMIC_Ctrl;MIC_Ctrl;quarterMIC_Ctrl	6	6	6	63	63	63	12.205	0	67.302
24.1127	24.1812	24.1552	24.3663	24.2906	24.2049	23.8988	23.6066	23.9002	23.8048	23.818	23.8993	23.9916	23.8835	24.1021	24.0733	24.0219	24.1989	24.0769	23.9344	24.5995	24.5069	24.171	24.0791	23.6609	24.1085	24.0797	23.9466	24.0721	23.9153				+	+	+					eighthMIC_Ctrl;halfMIC_Ctrl;quarterMIC_Ctrl	7	7	7	52.1	52.1	52.1	15.914	0	45.484
24.4149	23.723	24.0968	23.3391	23.2141	23.5101	21.4547	22.0433	22.338	20.8432	22.2708	21.595	21.6122	21.6177	21.7992	22.3309	20.8394	21.9286	22.4322	22.0252	22.3834	22.031	22.1404	21.6919	21.8057	21.4561	20.9241	22.4293	21.9525	21.9746				+	+	+	+				eighthMIC_Ctrl;halfMIC_Ctrl;MIC_Ctrl;quarterMIC_Ctrl	5	5	5	50	50	50	8.4364	0	13.648
26.4971	26.76	26.6047	26.8286	26.8729	26.702	27.1517	26.9812	27.1608	27.2313	27.2065	27.2172	27.1799	27.2112	27.1224	27.222	27.1586	27.212	27.127	27.0812	27.1553	27.085	27.1597	27.2211	27.035	27.2551	27.2294	27.1589	27.2146	27.2376				+	+	+	+				eighthMIC_Ctrl;halfMIC_Ctrl;MIC_Ctrl;quarterMIC_Ctrl	31	31	31	47.2	47.2	47.2	77.812	0	323.31
26.7537	26.4127	26.424	26.3133	26.1856	26.6134	25.8431	25.7819	25.7746	25.7665	25.9026	25.3824	25.6637	25.7065	25.9203	25.961	25.5598	25.9507	25.855	26.3137	26.2187	26.1646	25.8041	26.1504	25.8149	25.7402	25.7966	25.7929	25.7564	25.973				+	+	+	+				eighthMIC_Ctrl;halfMIC_Ctrl;MIC_Ctrl;quarterMIC_Ctrl	8	8	8	36.5	36.5	36.5	20.8	0	86.475
26.5144	26.5278	26.4804	26.6163	26.6026	26.5344	26.822	26.8131	26.9622	26.8767	27.0152	26.6987	27.0721	27.0871	27.1776	27.2829	27.0891	27.2047	27.1634	27.1294	27.1295	27.2933	27.1737	27.304	26.9208	27.0065	27.0036	27.1108	27.0379	27.0693				+	+	+	+				eighthMIC_Ctrl;halfMIC_Ctrl;MIC_Ctrl;quarterMIC_Ctrl	33	33	33	63.8	63.8	63.8	77.835	0	323.31
27.9867	27.7228	27.6812	27.8201	27.5424	27.7417	27.2503	27.2713	27.3398	27.2041	27.394	27.0143	26.8355	27.0459	27.1817	27.3386	27.0783	27.099	27.1111	27.2974	27.2469	27.2576	27.0566	27.4292	27.291	26.9106	27.0374	27.3834	27.0036	27.0771				+	+	+	+				eighthMIC_Ctrl;halfMIC_Ctrl;MIC_Ctrl;quarterMIC_Ctrl	10	10	10	75.9	75.9	75.9	17.743	0	193.94
25.3735	25.3213	25.4233	25.1861	24.8836	25.3741	24.4937	24.2809	24.7856	24.3411	24.7486	24.3081	24.3435	24.4402	24.466	24.5178	24.3359	24.5255	24.6972	24.5747	24.582	24.5192	24.3846	24.4671	24.4596	24.493	24.6543	24.4321	24.4058	24.7525				+	+	+	+				eighthMIC_Ctrl;halfMIC_Ctrl;MIC_Ctrl;quarterMIC_Ctrl	7	7	7	63.6	63.6	63.6	13.212	0	135.04
29.3138	29.2792	29.2848	29.2989	29.2659	29.223	29.0263	28.8539	29.0883	29.0154	29.1171	28.8912	28.9929	28.9796	29.1056	29.1952	28.9544	29.0432	29.114	29.1338	29.1462	29.2706	29.0966	29.1246	28.9509	28.9534	28.9504	29.0214	28.9514	29.0206				+	+	+	+				eighthMIC_Ctrl;halfMIC_Ctrl;MIC_Ctrl;quarterMIC_Ctrl	28	28	28	82.8	82.8	82.8	33.054	0	323.31
23.8927	23.3712	22.8576	22.2923	21.6557	22.5297	20.0364	20.8177	20.3069	19.6449	21.0933	20.3241	18.7764	20.0692	20.7492	20.068	20.1467	19.9018	20.2964	21.3068	19.0346	21.0532	20.4927	20.594	19.9477	19.939	20.0449	20.9006	20.0942	20.1743				+	+	+	+				eighthMIC_Ctrl;halfMIC_Ctrl;MIC_Ctrl;quarterMIC_Ctrl	4	4	4	89.7	89.7	89.7	7.2369	0	12.53
30.0405	29.0741	30.1953	29.0923	28.3681	29.1904	27.4989	27.5492	27.8376	27.5595	27.2649	26.847	25.8063	26.3432	26.1419	26.3892	26.3257	26.6433	25.64	25.6014	25.6577	25.5838	25.4423	25.3548	27.392	26.8972	26.9937	27.478	27.1865	27.0623				+	+	+	+		+	+	eighthMIC_Ctrl;halfMIC_Ctrl;halfMIC_quarterMIC;MIC_Ctrl;MIC_halfMIC;quarterMIC_Ctrl	5	5	5	39.9	39.9	39.9	24.203	0	67.871
26.1403	25.5966	26.1829	25.3124	25.2165	25.6591	24.6156	24.7775	24.7094	24.3658	24.6707	24.2726	23.9101	24.2659	24.1004	24.3084	24.0483	24.3056	24.4217	24.0962	24.2511	23.7836	23.883	23.8843	24.2025	24.1174	24.188	24.5118	24.3052	24.4715				+	+	+	+				eighthMIC_Ctrl;halfMIC_Ctrl;MIC_Ctrl;quarterMIC_Ctrl	5	5	5	80.5	80.5	80.5	10.789	0	114.56
28.1325	27.4018	27.884	27.2635	26.9699	27.4096	26.3548	26.6531	26.4842	26.313	26.4032	26.1954	25.728	25.9101	25.8874	26.165	25.6951	25.9294	26.0503	26.1778	26.3304	25.9157	25.9417	26.0271	26.3315	25.8299	25.9463	26.4273	25.9574	26.175				+	+	+	+				eighthMIC_Ctrl;halfMIC_Ctrl;MIC_Ctrl;quarterMIC_Ctrl	7	7	7	88.9	88.9	88.9	8.7516	0	108.33
23.949	24.3401	24.1489	24.3833	24.4033	24.5066	24.9336	24.6393	24.9603	24.9823	25.0465	24.8396	24.5132	24.7378	24.711	24.7882	24.5378	24.8322	24.7376	24.6959	24.7058	24.8647	24.7215	24.8739	24.4897	24.8083	24.8832	24.63	24.8186	24.6586				+	+	+	+				eighthMIC_Ctrl;halfMIC_Ctrl;MIC_Ctrl;quarterMIC_Ctrl	10	10	10	40.3	40.3	40.3	46.371	0	199.33
28.3985	27.68	28.2016	27.6564	27.3171	27.7772	26.6464	26.8681	26.8913	26.7802	26.9058	26.3436	26.0889	26.3283	26.4563	26.6606	26.3529	26.4999	26.578	26.5497	26.6987	26.0387	26.3172	26.4999	26.6525	26.2696	26.3428	26.7774	26.2845	26.6621				+	+	+	+				eighthMIC_Ctrl;halfMIC_Ctrl;MIC_Ctrl;quarterMIC_Ctrl	8	8	8	91	91	91	11.267	0	67.488
21.3806	21.517	21.4829	21.6206	21.4164	21.2395	21.742	21.9042	22.0831	21.7508	21.9817	22.0325	21.925	21.9345	22.2056	22.2308	22.1635	22.2507	21.994	22.0153	21.891	22.1529	21.8902	22.3491	21.8335	22.0107	21.8673	21.9625	21.9102	21.9862				+	+	+	+				eighthMIC_Ctrl;halfMIC_Ctrl;MIC_Ctrl;quarterMIC_Ctrl	4	4	4	9.5	9.5	9.5	60.745	0	20.088
22.3178	22.7111	22.8336	22.7497	22.8641	22.4673	23.2354	23.051	23.5651	23.5642	23.4238	23.547	22.3873	22.5306	22.3585	22.3241	22.4562	22.4534	22.6837	22.3056	22.2032	22.5544	22.396	22.2907	22.6976	23.0245	23.3472	22.7925	23.2945	23.25				+	+	+	+		+		eighthMIC_Ctrl;halfMIC_Ctrl;halfMIC_quarterMIC;MIC_Ctrl;quarterMIC_Ctrl	8	8	8	52.7	52.7	52.7	15.44	0	45.365
28.6643	28.9034	28.7832	28.9296	29.0202	28.7568	29.2645	29.2076	29.1287	29.2211	29.194	29.11	29.0401	29.274	29.1622	28.883	29.1885	28.9772	28.98	29.0816	28.9791	29.0503	29.0583	29.1677	29.1767	29.1784	29.0204	29.1621	29.1307	29.2399				+	+	+	+				eighthMIC_Ctrl;halfMIC_Ctrl;MIC_Ctrl;quarterMIC_Ctrl	20	20	20	62.2	62.2	62.2	41.382	0	323.31
28.8468	28.0122	28.4381	27.991	27.6492	28.1359	27.0872	27.2254	27.211	27.2217	26.9714	26.6459	25.9622	26.2633	25.6938	26.0511	26.0931	26.53	26.7425	26.4069	26.4736	26.5221	26.4011	26.7809	26.269	26.1108	26.5648	26.2758	26.5467	26.5275				+	+	+	+	+			eighthMIC_Ctrl;halfMIC_Ctrl;MIC_Ctrl;quarterMIC_Ctrl;quarterMIC_eighthMIC	4	4	4	69.4	69.4	69.4	8.2796	0	208.25
28.8466	29.0098	28.8107	28.8965	28.9638	28.8355	29.0756	29.0745	29.2996	29.1517	29.2139	29.2214	29.2559	29.3106	29.2479	29.0868	29.2642	29.3213	29.0925	29.1191	28.8586	28.9924	29.1077	29.1856	29.2187	29.1954	29.2931	29.1534	29.3131	29.2143				+	+	+	+				eighthMIC_Ctrl;halfMIC_Ctrl;MIC_Ctrl;quarterMIC_Ctrl	21	21	21	68.5	68.5	68.5	23.013	0	156.26
30.996	31.3569	30.923	30.9984	31.0236	31.1284	30.5694	30.58	30.5892	30.8032	30.6988	30.4514	30.2712	30.485	30.6915	30.7723	30.2782	30.2778	30.7289	31.0277	30.7811	30.8382	30.4471	30.7765	30.7897	30.3828	30.3991	30.7915	30.2803	30.8211				+	+	+	+				eighthMIC_Ctrl;halfMIC_Ctrl;MIC_Ctrl;quarterMIC_Ctrl	12	12	12	84.4	84.4	84.4	9.6259	0	323.31
24.8194	24.8758	24.9098	24.948	24.9845	24.921	24.6715	24.6949	24.8258	24.7206	24.7467	24.7039	24.8729	24.7856	24.9704	24.8399	24.8219	24.9418	24.7468	24.8827	24.8952	24.8258	24.8284	25.0518	24.692	24.7367	24.7876	24.8052	24.8861	24.8543				+	+						eighthMIC_Ctrl;quarterMIC_Ctrl	13	13	13	55	55	55	34.211	0	203.07
31.3243	30.4576	30.977	30.3959	29.9642	30.5202	29.3395	29.696	29.5697	29.2863	29.4405	29.0643	28.3712	28.5942	28.6948	28.8132	28.5984	28.7385	28.8487	28.9288	29.0781	28.8796	28.7516	28.9773	28.9711	28.7091	28.7665	29.2681	28.673	29.0184				+	+	+	+				eighthMIC_Ctrl;halfMIC_Ctrl;MIC_Ctrl;quarterMIC_Ctrl	8	8	8	89.8	89.8	89.8	9.4956	0	200.77
26.7012	26.0496	25.9647	25.894	25.7536	26.0437	25.0725	25.218	25.4179	25.1889	25.4059	24.9384	24.5371	24.4687	24.4514	24.5509	24.4603	24.6338	24.6372	24.524	24.4064	24.2121	24.7102	24.8948	24.7863	24.4914	24.7638	24.8148	24.7859	24.7228				+	+	+	+	+			eighthMIC_Ctrl;halfMIC_Ctrl;MIC_Ctrl;quarterMIC_Ctrl;quarterMIC_eighthMIC	2	2	2	24.5	24.5	24.5	12.141	0	101.4
25.8074	25.6463	26.3208	25.7395	25.4524	25.7564	27.1195	27.6578	26.5515	27.3386	26.4535	27.5461	26.1866	26.6061	26.2323	25.969	26.4802	26.0853	25.6216	26.0192	25.8127	25.8603	25.404	25.3627	27.102	25.9054	26.344	26.8431	26.3619	26.6822				+	+	+					eighthMIC_Ctrl;halfMIC_Ctrl;quarterMIC_Ctrl	9	9	9	56.2	56.2	56.2	9.3098	0	23.129
23.6067	23.2006	23.1883	23.1012	23.1069	23.2748	22.8318	22.5955	22.9499	22.6802	22.6517	22.6499	22.8147	22.9387	23.3531	23.3217	23.0541	23.3376	22.8069	22.9492	22.7552	23.1336	22.8583	22.9767	22.7144	22.8584	23.0101	22.8519	22.9764	22.9583				+	+		+				eighthMIC_Ctrl;MIC_Ctrl;quarterMIC_Ctrl	3	3	3	70.1	70.1	70.1	8.8988	0	33.274
25.6236	25.8229	25.8366	25.792	26.0117	25.8769	25.2866	25.189	25.5612	25.4383	25.5282	25.4236	25.7493	25.7276	25.5539	25.5855	25.6499	25.7834	25.8265	25.7339	25.7536	25.75	25.7378	25.7266	25.4393	25.5841	25.6061	25.573	25.7127	25.5139				+	+	+					eighthMIC_Ctrl;halfMIC_Ctrl;quarterMIC_Ctrl	16	16	16	87.8	87.8	87.8	24.032	0	209.18
25.7666	25.1485	25.4405	24.8961	24.6726	25.0692	24.0111	24.1685	24.2431	24.2578	24.2805	23.5099	23.4194	23.5126	23.4896	23.9214	23.6004	23.3049	23.6488	23.5782	23.873	23.7104	23.7917	23.7257	23.6447	23.5744	23.8811	23.9506	23.8565	23.8734				+	+	+	+				eighthMIC_Ctrl;halfMIC_Ctrl;MIC_Ctrl;quarterMIC_Ctrl	6	6	6	82.5	82.5	82.5	11.036	0	78.024
26.4254	25.6495	25.9693	25.5051	25.1435	25.3	24.3469	24.6844	24.7287	24.5532	24.6105	24.5753	24.2138	24.2897	24.4072	24.49	24.3729	24.2046	24.4277	24.7716	24.8226	24.393	24.5816	24.6691	24.7128	24.3322	24.4064	24.6861	24.3047	24.4057				+	+	+	+				eighthMIC_Ctrl;halfMIC_Ctrl;MIC_Ctrl;quarterMIC_Ctrl	19	19	19	40.8	40.8	40.8	70.931	0	112.32
29.4132	28.8632	29.3154	29.0267	28.702	29.103	28.2985	28.5223	28.5076	28.4153	28.5454	28.3734	28.107	28.3092	28.2145	28.4714	28.4451	28.1699	28.4658	28.5112	28.5036	28.3194	28.2866	28.326	28.5764	28.1646	28.3654	28.6815	28.2539	28.5296				+	+	+	+				eighthMIC_Ctrl;halfMIC_Ctrl;MIC_Ctrl;quarterMIC_Ctrl	14	14	14	82.6	82.6	82.6	22.464	0	192.49
22.9567	22.7633	22.935	22.9121	22.8227	22.8806	22.4959	22.5866	22.7892	22.4801	22.6048	22.4948	22.6601	22.7794	22.6732	23.0024	22.7807	22.9189	22.6852	22.5703	22.5924	23.1084	22.9517	23.1441	22.8158	22.6767	22.7008	22.6763	22.8037	22.4127				+	+						eighthMIC_Ctrl;quarterMIC_Ctrl	5	5	5	39.3	39.3	39.3	22.685	0	68.386
23.312	22.8584	22.9666	22.5721	22.1436	22.7523	21.1193	19.7071	21.3658	21.0582	21.3838	21.6136	20.8125	20.9494	21.0387	20.8443	20.7363	20.6837	21.0664	20.9208	21.2442	20.8596	20.8915	21.1213	20.8737	20.8181	20.6148	20.9535	20.8446	20.5179				+	+	+	+				eighthMIC_Ctrl;halfMIC_Ctrl;MIC_Ctrl;quarterMIC_Ctrl	11	8	8	13.7	9.7	9.7	107.79	0	43.721
23.9996	24.2206	23.8338	24.2903	24.3269	24.24	24.618	24.4956	24.5417	24.6712	24.7358	24.6263	24.8773	24.8567	24.731	24.7423	24.8489	24.8613	24.6598	24.4182	24.5296	24.7927	24.6005	24.658	24.4371	24.6728	24.8219	24.5322	24.8516	24.8174				+	+	+	+				eighthMIC_Ctrl;halfMIC_Ctrl;MIC_Ctrl;quarterMIC_Ctrl	16	16	16	51.2	51.2	51.2	51.107	0	200.04
22.83	21.958	22.8023	21.854	21.9976	21.0589	18.3403	19.0573	20.6068	18.9765	20.2714	20.333	19.9336	19.8069	20.1281	19.9996	19.752	19.3861	20.1459	20.2792	20.7751	20.2635	20.272	21.0981	20.1542	19.7969	20.6902	20.4394	20.3347	19.3678				+	+	+	+				eighthMIC_Ctrl;halfMIC_Ctrl;MIC_Ctrl;quarterMIC_Ctrl	2	2	2	7.5	7.5	7.5	30.456	0.0060449	1.7047
27.7367	27.1611	27.651	26.9309	26.5064	27.1522	25.9401	26.2625	26.2998	26.1128	26.1929	25.7834	25.6273	25.781	25.8188	26.0428	25.6516	25.6728	25.8775	26.1761	26.1768	25.9524	25.6588	25.9661	26.3064	25.5503	25.6476	26.2747	25.7034	26.0382				+	+	+	+				eighthMIC_Ctrl;halfMIC_Ctrl;MIC_Ctrl;quarterMIC_Ctrl	6	6	6	83.3	83.3	83.3	8.1501	0	33.648
24.3645	24.4423	24.6814	24.4469	24.4383	24.5002	23.9402	23.8547	24.2645	23.869	24.0486	24.2136	24.1238	23.9996	24.1481	24.1861	24.1649	24.2351	24.3007	24.7388	24.5094	24.2799	24.1443	24.2516	24.2302	23.8998	24.12	24.0406	24.1215	24.11				+	+	+					eighthMIC_Ctrl;halfMIC_Ctrl;quarterMIC_Ctrl	6	6	6	28.3	28.3	28.3	31.734	0	53.242
23.3038	22.4992	23.1251	21.7212	21.9814	21.5194	20.0821	19.9012	20.3785	20.2014	21.042	21.0235	19.72	21.1294	19.5866	19.7773	19.7025	18.7314	19.5918	19.7928	20.0056	20.4701	20.1175	19.7913	19.6246	20.6579	19.5289	20.7343	19.549	20.1046				+	+	+	+				eighthMIC_Ctrl;halfMIC_Ctrl;MIC_Ctrl;quarterMIC_Ctrl	4	4	4	44.4	44.4	44.4	8.043	0	12.7
22.1337	21.9828	21.9928	22.2036	21.7499	22.075	22.2739	22.5845	22.8017	22.7447	22.6585	22.4008	22.8735	22.79	23.0421	23.2536	23.0574	23.2427	22.984	22.9336	22.4381	23.013	22.9346	22.725	22.3046	22.9391	22.9595	22.8652	22.6721	22.7245				+	+	+	+				eighthMIC_Ctrl;halfMIC_Ctrl;MIC_Ctrl;quarterMIC_Ctrl	5	5	5	41.1	41.1	41.1	20.219	0	101.56
23.7533	23.2932	23.4422	23.4492	23.1509	23.4391	22.8162	22.9794	22.7621	22.8623	23.0847	22.5593	23.2761	23.0938	23.0763	23.3081	23.135	23.1719	23.1014	22.9231	23.0846	23.2495	22.9899	23.7007	23.1022	23.1221	23.1094	23.2878	23.1918	22.919				+	+	+					eighthMIC_Ctrl;halfMIC_Ctrl;quarterMIC_Ctrl	4	4	4	30.6	30.6	30.6	24.854	0	41.76
24.5333	24.777	24.6594	24.8746	24.8956	24.6341	25.1755	24.8829	25.2526	25.1414	25.2423	25.2707	25.2941	25.1222	25.2004	25.271	25.3199	25.3207	25.2695	25.1984	25.2737	25.5456	25.181	25.3762	25.0859	25.2722	25.2852	25.1076	25.289	25.2375				+	+	+	+				eighthMIC_Ctrl;halfMIC_Ctrl;MIC_Ctrl;quarterMIC_Ctrl	9	9	9	45.3	45.3	45.3	29.857	0	154.62
23.6242	24.0665	23.8218	24.1969	24.2678	23.8456	23.3406	23.3261	23.3592	23.4099	23.583	23.4454	23.6667	23.5424	23.389	23.6459	23.6679	23.6094	23.6416	23.6607	23.6625	23.8303	23.7175	23.7108	23.375	23.7031	23.6252	23.2818	23.6447	23.5722				+	+	+	+				eighthMIC_Ctrl;halfMIC_Ctrl;MIC_Ctrl;quarterMIC_Ctrl	7	7	7	51	51	51	23.352	0	100.55
25.6321	25.9042	25.8847	25.922	26.0957	25.6983	26.1848	26.1349	26.3454	26.3023	26.2945	26.2107	26.4734	26.3542	26.4836	26.4639	26.3717	26.485	26.4321	26.4623	26.372	26.6773	26.7053	26.5301	26.1583	26.3961	26.2983	26.2179	26.5378	26.281				+	+	+	+				eighthMIC_Ctrl;halfMIC_Ctrl;MIC_Ctrl;quarterMIC_Ctrl	19	19	19	41	41	41	59.981	0	240.03
23.8175	22.8905	23.8173	22.873	22.6043	22.3553	21.5643	22.0044	21.538	21.967	21.3975	21.5391	21.597	21.6161	21.4842	21.9779	21.5447	21.7105	21.9313	21.9676	21.9899	20.9888	22.1875	21.7816	21.7801	21.6934	21.77	21.8873	21.7466	21.9396				+	+	+	+				eighthMIC_Ctrl;halfMIC_Ctrl;MIC_Ctrl;quarterMIC_Ctrl	3	3	3	28.4	28.4	28.4	12.597	0	16.383
23.4669	23.8494	23.7343	23.9793	24.0698	23.5875	24.3859	24.1938	24.4592	24.3088	24.453	24.163	24.5635	24.3959	24.6033	24.5781	24.5803	24.6944	24.5654	24.5284	24.6323	24.8	24.4084	24.6718	24.2529	24.2777	24.3844	24.2491	24.4045	24.3849				+	+	+	+				eighthMIC_Ctrl;halfMIC_Ctrl;MIC_Ctrl;quarterMIC_Ctrl	9	9	9	41.9	41.9	41.9	29.496	0	79.925
23.2138	23.4316	23.4846	23.3756	23.1281	23.3387	22.9783	22.835	23.1279	22.9916	22.9971	23.0078	22.7091	22.5588	22.9052	22.9571	22.651	22.7557	22.5973	23.0088	22.9357	22.8401	22.8952	22.9993	22.7271	22.7209	22.8962	22.9586	22.9835	23.0063				+	+	+	+				eighthMIC_Ctrl;halfMIC_Ctrl;MIC_Ctrl;quarterMIC_Ctrl	3	3	3	31.1	31.1	31.1	12.485	0	32.162
22.7349	22.7953	22.985	22.9313	22.9457	22.5827	22.2544	22.1891	22.5267	22.4862	22.3892	22.5204	22.6223	22.6923	22.8749	22.5568	22.5488	22.76	22.5952	22.76	22.5089	22.7161	22.7628	22.9244	22.588	22.6593	22.5529	22.492	22.8673	22.4528				+	+						eighthMIC_Ctrl;quarterMIC_Ctrl	10	10	10	26	26	26	69.284	0	65.529
25.2234	25.0047	24.9944	25.0782	24.8267	24.951	24.6135	24.694	24.7311	24.6522	24.6653	24.3397	24.4836	24.5321	24.5989	24.9826	24.6821	24.709	24.7478	24.7347	24.8811	24.8305	24.7514	24.9893	24.7844	24.4896	24.6735	24.7644	24.5445	24.7001				+	+	+	+				eighthMIC_Ctrl;halfMIC_Ctrl;MIC_Ctrl;quarterMIC_Ctrl	24	24	24	29.1	29.1	29.1	108.71	0	168.26
20.8185	21.501	21.2774	21.3536	21.6151	20.4127	20.4611	19.8754	18.7942	19.8995	19.2894	18.9144	18.4858	19.043	18.5915	20.7242	19.6733	20.6473	19.655	20.3024	20.4911	20.2536	19.7494	20.0597	20.1233	20.1422	19.3912	19.3954	19.1473	20.642				+	+	+	+				eighthMIC_Ctrl;halfMIC_Ctrl;MIC_Ctrl;quarterMIC_Ctrl	3	3	3	12.1	12.1	12.1	37.237	0	49.551
22.8887	22.8909	22.629	22.9059	22.9535	22.7155	23.322	23.1395	23.2272	23.1914	23.6522	23.2203	23.2895	23.3343	23.2381	23.5367	23.3485	23.4133	23.389	23.2308	22.9365	23.3113	23.0824	22.7934	23.2591	23.0725	23.3725	23.1308	23.3022	23.149				+	+	+	+				eighthMIC_Ctrl;halfMIC_Ctrl;MIC_Ctrl;quarterMIC_Ctrl	4	4	4	15.2	15.2	15.2	44.279	0	52.463
24.7035	24.9366	24.7438	24.7157	24.6506	24.669	24.9179	24.9987	25.1213	25.2035	25.2752	24.9992	25.2043	25.1786	24.6109	25.3395	25.0495	25.5119	25.1186	24.3901	24.9466	25.0759	24.7769	24.7783	25.1443	24.8986	25.2492	25.2651	25.3433	25.3313				+	+	+					eighthMIC_Ctrl;halfMIC_Ctrl;quarterMIC_Ctrl	4	4	4	39.1	39.1	39.1	14.812	0	24.231
23.4788	23.5965	23.5452	23.5512	23.3719	23.4157	23.3419	22.8818	23.089	23.1117	23.2334	23.1425	23.0667	23.2307	23.2191	23.2065	23.183	23.217	23.2431	23.1826	23.48	23.647	23.1128	23.3048	22.6111	23.4411	23.0858	23.2153	23.1392	22.925				+	+	+					eighthMIC_Ctrl;halfMIC_Ctrl;quarterMIC_Ctrl	5	5	5	65.1	65.1	65.1	12.437	0	67.564
23.5721	23.6438	23.4445	23.7112	23.8927	23.4919	24.1803	23.7863	24.2112	24.0674	24.0768	24.2037	24.1535	24.1253	23.8258	23.8323	24.1331	24.2126	24.2168	23.9065	24.1323	23.4364	24.0309	23.8405	23.7308	24.4473	24.0738	23.9003	24.458	24.1495				+	+	+	+				eighthMIC_Ctrl;halfMIC_Ctrl;MIC_Ctrl;quarterMIC_Ctrl	7	7	7	50.5	50.5	50.5	22.213	0	36.342
24.0606	24.3559	23.9779	24.35	24.209	24.3086	24.577	24.5466	24.5313	24.5916	24.4521	24.6037	24.535	24.5589	24.5531	24.5989	24.6152	24.5858	24.4223	24.3603	24.5591	24.5062	24.6369	24.6333	24.4214	24.7428	24.6419	24.5167	24.6343	24.5197				+	+	+	+				eighthMIC_Ctrl;halfMIC_Ctrl;MIC_Ctrl;quarterMIC_Ctrl	11	11	11	39.6	39.6	39.6	36.266	0	119.19
24.0255	23.3491	23.9895	23.0445	22.7459	23.7298	22.4324	22.5663	22.5114	22.0861	22.3826	22.0452	21.8511	21.6221	20.1346	21.986	21.6837	20.408	22.1041	20.5276	22.0868	20.7592	20.0647	19.8127	21.9797	20.9407	21.8463	20.5003	21.7272	21.9299				+	+	+	+				eighthMIC_Ctrl;halfMIC_Ctrl;MIC_Ctrl;quarterMIC_Ctrl	1	1	1	16.9	16.9	16.9	9.1962	0	9.1564
26.6572	26.2942	26.5447	26.094	26.0062	26.1234	25.5278	25.6313	25.8581	25.6146	25.875	25.5712	25.7383	25.6675	25.734	25.8947	25.7366	25.9217	25.817	25.9016	25.9683	25.9404	25.8574	25.873	25.5429	25.6781	25.7312	25.789	25.7238	25.9317				+	+	+	+				eighthMIC_Ctrl;halfMIC_Ctrl;MIC_Ctrl;quarterMIC_Ctrl	5	5	5	83.9	83.9	83.9	9.9211	0	64.271
27.4399	27.4587	27.2276	27.2437	27.512	27.3662	27.0619	26.9828	27.1601	26.9228	27.2009	27.0098	27.1076	26.9982	27.3627	27.3094	27.1789	27.36	27.1466	27.1953	26.9602	27.2126	27.2713	27.2498	27.0872	27.2034	27.1972	27.1646	27.0648	27.089				+	+	+	+				eighthMIC_Ctrl;halfMIC_Ctrl;MIC_Ctrl;quarterMIC_Ctrl	12	12	12	81.9	81.9	81.9	22.435	0	279.45
27.0346	26.1375	26.976	25.7918	25.6673	26.1975	24.9813	25.2573	25.239	24.7153	25.1889	24.5236	24.3778	24.707	24.7803	24.9407	24.6541	24.6876	24.8807	25.2802	25.3298	25.028	24.5588	24.8904	25.2229	24.2613	22.6708	25.1146	24.5206	24.8522				+	+	+	+				eighthMIC_Ctrl;halfMIC_Ctrl;MIC_Ctrl;quarterMIC_Ctrl	3	3	3	79.2	79.2	79.2	6.305	0	159.75
24.5018	24.7437	24.608	24.7119	24.711	24.6973	24.2178	24.1644	24.5211	24.4437	24.3701	24.3091	24.0964	24.2593	24.415	24.57	24.3981	24.3275	24.239	24.3658	24.5195	24.5582	24.2481	24.4741	24.2188	24.4069	24.4606	24.3065	24.3396	24.491				+	+	+	+				eighthMIC_Ctrl;halfMIC_Ctrl;MIC_Ctrl;quarterMIC_Ctrl	7	7	7	43.6	43.6	43.6	24.019	0	55.947
27.672	26.7433	27.0572	27.0903	27.0983	26.9082	25.5211	24.7849	25.4403	25.6713	25.9167	23.2967	25.696	24.784	26.4006	26.2358	26.2981	24.9649	25.5107	24.2948	24.9291	25.5987	25.9481	25.9468	23.5904	26.1714	25.6325	23.0491	24.8096	24.8222				+	+	+	+				eighthMIC_Ctrl;halfMIC_Ctrl;MIC_Ctrl;quarterMIC_Ctrl	5	5	5	59	59	59	9.0631	0	72.257
26.4983	26.7166	26.5379	26.7919	26.7932	26.6264	26.9677	26.7787	27.0504	27.0408	27.0578	27.0057	27.0572	27.0244	27.0079	27.2621	27.0337	27.1288	26.9886	27.0397	26.9654	27.1024	27.1275	27.0662	26.887	27.1009	27.1744	27.0572	27.0929	27.0928				+	+	+	+				eighthMIC_Ctrl;halfMIC_Ctrl;MIC_Ctrl;quarterMIC_Ctrl	23	23	23	50.4	50.4	50.4	69.195	0	320.92
23.0919	23.2252	23.0232	23.4038	23.2207	23.489	22.7526	22.5707	22.5433	22.897	22.9487	22.858	22.5859	22.7389	22.148	22.7948	22.6027	22.6338	22.3266	22.3665	22.1176	22.44	23.0414	22.572	22.5246	22.6883	22.8562	22.7818	22.879	20.1045				+		+	+				eighthMIC_Ctrl;halfMIC_Ctrl;MIC_Ctrl	3	3	3	48.1	48.1	48.1	14.517	0	19.665
22.4726	22.6071	22.3601	22.311	22.7971	22.08	23.2035	23.0286	23.1317	22.7259	23.0611	22.9527	22.9794	23.0282	22.8308	23.1348	23.0397	23.1142	23.1327	22.7844	23.053	23.4765	22.493	22.625	23.1438	23.2547	23.0318	23.031	23.1994	23.2517				+	+	+	+				eighthMIC_Ctrl;halfMIC_Ctrl;MIC_Ctrl;quarterMIC_Ctrl	12	12	12	28.7	28.7	28.7	73.78	0	55.134
24.6069	24.928	24.7192	24.6689	24.9769	24.7057	25.1434	24.9977	25.1008	25.1307	25.05	25.0337	25.2583	25.2834	25.3084	25.4123	25.3149	25.3561	25.2645	25.2504	25.22	25.4157	25.4571	25.2037	25.1138	25.2833	25.2315	25.0609	25.2275	25.163				+	+	+	+				eighthMIC_Ctrl;halfMIC_Ctrl;MIC_Ctrl;quarterMIC_Ctrl	11	11	11	46	46	46	35.053	0	155.97
24.6395	24.5468	24.8757	24.2426	24.5454	23.9964	24.969	25.5179	25.1164	25.3618	25.0121	25.6401	25.2651	25.1636	25.0609	24.4577	25.0353	24.7366	24.3488	24.7126	24.5851	24.5007	24.4009	24.26	25.1252	25.1422	24.9776	25.083	25.118	24.8912				+	+	+					eighthMIC_Ctrl;halfMIC_Ctrl;quarterMIC_Ctrl	11	11	11	49.7	49.7	49.7	17.089	0	154.92
23.5343	23.8878	23.5777	23.4749	23.56	23.043	22.7282	22.7955	23.0179	23.1524	22.8964	22.9293	22.6738	22.8174	22.6927	22.952	22.9172	22.8026	22.6686	23.0897	22.4926	22.8535	23.3765	22.5948	22.7769	22.7445	22.8234	23.0466	22.8053	22.9036				+	+	+	+				eighthMIC_Ctrl;halfMIC_Ctrl;MIC_Ctrl;quarterMIC_Ctrl	16	16	16	35	35	35	65.784	0	24.966
27.3261	27.0995	26.8501	27.1995	26.612	26.9446	26.4283	26.5065	26.4626	26.2236	26.4723	25.8654	26.1385	26.5806	26.7628	26.7981	26.5474	26.8317	27.1327	27.101	27.2395	27.2673	26.7735	27.2679	26.581	26.4047	26.4435	26.6501	26.3735	26.4225				+	+	+					eighthMIC_Ctrl;halfMIC_Ctrl;quarterMIC_Ctrl	9	9	9	61	61	61	29.327	0	224.75
23.8701	24.2023	23.6497	24.2517	24.1634	23.8416	24.6237	24.319	24.4416	24.488	24.6523	24.5687	24.3679	24.5945	24.6032	24.5685	24.4734	24.5947	24.4373	24.3816	24.2287	24.4299	24.7691	24.4809	24.6431	24.6578	24.5808	24.4345	24.5439	24.3412				+	+	+	+				eighthMIC_Ctrl;halfMIC_Ctrl;MIC_Ctrl;quarterMIC_Ctrl	9	9	9	33.2	33.2	33.2	41.76	0	193.39
23.2281	22.2126	24.4078	23.8666	23.3526	22.6205	21.618	21.7253	21.7895	21.8082	21.6481	20.5791	20.793	20.9502	20.9373	21.3756	21.1642	21.0725	21.1301	20.9948	19.6774	20.5848	20.7522	20.1884	19.5671	21.1679	21.3744	21.3969	21.3697	21.421				+	+	+	+				eighthMIC_Ctrl;halfMIC_Ctrl;MIC_Ctrl;quarterMIC_Ctrl	1	1	1	21	21	21	7.1921	0	4.3383
19.834	20.5169	20.7302	20.4462	20.6789	19.937	21.3542	20.9272	20.9405	21.2285	21.2583	21.1829	20.8956	21.1983	21.1195	21.3122	20.9412	21.6012	21.2661	21.0068	21.2063	21.1497	21.7826	21.3462	21.7041	20.717	21.1589	21.1089	21.2061	20.8272				+	+	+	+				eighthMIC_Ctrl;halfMIC_Ctrl;MIC_Ctrl;quarterMIC_Ctrl	3	3	3	9.6	9.6	9.6	31.489	0	3.0309
23.4747	22.897	23.1694	22.511	22.5277	22.9458	22.0967	22.2108	22.2698	21.9845	22.3586	22.1372	21.814	22.2227	22.1769	22.0704	21.775	21.8979	22.1521	22.16	22.205	22.1633	22.0592	22.2831	22.3095	21.2108	21.8112	22.3275	21.9207	21.8883				+	+	+	+				eighthMIC_Ctrl;halfMIC_Ctrl;MIC_Ctrl;quarterMIC_Ctrl	3	3	3	27.5	27.5	27.5	10.692	0	92.796
23.9178	23.6156	23.7407	23.5947	23.62	23.5518	23.2787	22.9919	23.2918	23.3938	23.4687	23.1327	23.1303	23.3215	23.1732	23.4274	23.0063	23.2471	23.1321	23.3632	23.3604	23.5843	22.9458	23.138	23.3604	23.0078	22.9993	23.2914	23.2714	23.2901				+	+	+	+				eighthMIC_Ctrl;halfMIC_Ctrl;MIC_Ctrl;quarterMIC_Ctrl	10	10	10	27.6	27.6	27.6	57.922	0	22.104
23.7814	23.7524	23.7021	23.9745	23.9353	23.9875	24.234	24.0774	24.2947	24.0976	24.358	24.0598	24.451	24.3502	24.406	24.5738	24.4287	24.4703	24.4139	24.3956	24.3191	24.6279	24.3913	24.5025	24.0795	24.4599	24.3462	24.199	24.4352	24.3512				+	+	+	+				eighthMIC_Ctrl;halfMIC_Ctrl;MIC_Ctrl;quarterMIC_Ctrl	12	12	12	36.1	36.1	36.1	50.052	0	75.242
22.7041	21.6906	22.2881	21.9371	21.398	20.5808	20.1499	19.961	20.8675	20.3047	20.1606	20.2164	21.3046	20.5959	21.0583	21.144	20.8012	19.2831	21.2906	21.4014	21.438	20.9653	20.627	19.8183	21.6906	19.9629	21.5595	20.7563	21.473	21.0058				+		+	+				eighthMIC_Ctrl;halfMIC_Ctrl;MIC_Ctrl	4	4	4	17.6	17.6	17.6	33.352	0	56.088
22.2504	22.7101	22.3136	22.3542	22.0975	22.494	23.0543	23.114	22.8349	22.6657	22.7229	23.1682	22.8334	22.6772	22.7268	22.664	22.5714	22.4245	22.3384	23.263	23.2559	22.8266	22.4058	22.6068	22.9565	23.0667	22.8699	23.0376	22.96	22.8484				+	+	+	+				eighthMIC_Ctrl;halfMIC_Ctrl;MIC_Ctrl;quarterMIC_Ctrl	11	11	11	32.7	32.7	32.7	53.658	0	71.204
28.7856	28.4781	28.8098	28.6586	28.4854	28.595	27.9832	28.2315	28.1821	28.3995	28.1146	28.4325	28.0055	27.8812	27.8238	27.8949	27.7083	27.6455	27.998	28.1853	28.2317	27.73	27.7344	27.855	28.4259	28.028	27.9011	28.1409	27.9613	28.331				+	+	+	+				eighthMIC_Ctrl;halfMIC_Ctrl;MIC_Ctrl;quarterMIC_Ctrl	15	15	15	82.6	82.6	82.6	14.831	0	220.13
29.8597	30.2141	29.905	30.1883	30.1272	30.0539	30.3921	30.2533	30.4048	30.3692	30.3815	30.2887	30.3234	30.4879	30.4476	30.5304	30.425	30.5255	30.4294	30.3903	30.3273	30.4679	30.376	30.4917	30.2935	30.3709	30.4382	30.376	30.4146	30.3601				+	+	+	+				eighthMIC_Ctrl;halfMIC_Ctrl;MIC_Ctrl;quarterMIC_Ctrl	27	27	27	70.3	70.3	70.3	47.116	0	323.31
23.4563	23.4733	23.3001	23.6464	23.945	23.5804	23.9665	23.8953	24.0374	23.9972	24.0772	23.9129	24.3986	23.9912	24.1854	24.1652	24.205	24.2649	24.019	24.4139	24.2354	24.1094	23.9555	24.1472	23.9274	24.217	24.3071	23.9856	24.3009	24.0981				+	+	+	+				eighthMIC_Ctrl;halfMIC_Ctrl;MIC_Ctrl;quarterMIC_Ctrl	6	6	6	46.4	46.4	46.4	19.37	0	48.388
28.9104	29.1658	28.984	29.1984	29.2957	29.1647	29.4968	29.2884	29.5257	29.4617	29.5384	29.3284	29.6044	29.6374	29.6553	29.6978	29.6434	29.7797	29.6454	29.5042	29.6251	29.7125	29.6179	29.7457	29.3904	29.5514	29.6046	29.4627	29.5802	29.5433				+	+	+	+				eighthMIC_Ctrl;halfMIC_Ctrl;MIC_Ctrl;quarterMIC_Ctrl	34	34	34	83.2	83.2	83.2	51.4	0	323.31
27.6649	27.818	27.7806	27.6601	27.3894	27.4875	27.9736	28.1337	28.0605	28.2048	27.7988	28.3791	27.8556	28.092	27.8657	27.6114	27.924	27.795	27.136	27.1847	26.7782	27.0154	27.0935	26.7098	28.3029	28.0617	28.0429	28.1919	27.9285	28.234				+	+	+	+			+	eighthMIC_Ctrl;halfMIC_Ctrl;MIC_Ctrl;MIC_halfMIC;quarterMIC_Ctrl	16	16	16	63.8	63.8	63.8	13.362	0	45.279
29.764	29.2155	29.4771	29.1485	28.7864	29.5154	28.6208	28.638	28.8091	28.6212	28.7692	28.211	28.3596	28.6106	28.639	28.6129	28.635	28.8135	28.9014	28.8924	28.9838	28.9011	28.662	28.6639	28.9686	28.3606	28.4287	28.7878	28.4406	28.6916				+	+	+	+				eighthMIC_Ctrl;halfMIC_Ctrl;MIC_Ctrl;quarterMIC_Ctrl	5	5	5	55.1	55.1	55.1	8.0902	0	151.6
23.1389	23.5182	23.2327	23.5203	23.3768	23.1622	23.815	23.5473	23.7342	23.5698	23.8276	23.658	23.9857	23.9162	23.9112	23.7709	23.9137	23.9645	23.7217	23.6796	23.7286	23.8973	23.8773	23.4816	23.5547	23.9372	23.8009	23.7726	23.9171	23.6438				+	+	+	+				eighthMIC_Ctrl;halfMIC_Ctrl;MIC_Ctrl;quarterMIC_Ctrl	7	7	7	19.6	19.6	19.6	42.823	0	42.059
25.7593	26.0786	25.7391	26.0205	26.205	25.8704	26.3259	26.121	26.4223	26.3248	26.5541	26.384	26.5051	26.5104	26.5853	26.5157	26.5718	26.6913	26.6363	26.5311	26.6041	26.6269	26.6385	26.6483	26.1462	26.4557	26.6094	26.4804	26.551	26.368				+	+	+	+				eighthMIC_Ctrl;halfMIC_Ctrl;MIC_Ctrl;quarterMIC_Ctrl	10	10	10	71.7	71.7	71.7	18.475	0	218.01
22.0422	22.1804	22.4526	22.2971	22.7123	22.2828	22.9009	22.5219	22.7646	22.8579	22.8904	22.8904	22.7995	22.7287	22.7863	22.8939	22.7752	22.961	22.6672	22.6466	22.5458	22.6288	22.5863	22.4577	22.2351	22.8788	22.9475	22.4004	22.8953	22.7075				+	+	+	+			+	eighthMIC_Ctrl;halfMIC_Ctrl;MIC_Ctrl;MIC_halfMIC;quarterMIC_Ctrl	10	10	10	39.1	39.1	39.1	39.192	0	21.656
25.5555	25.9258	26.0007	25.4699	25.6084	25.2541	25.9961	26.1778	26.2659	26.2735	26.0231	26.4371	25.9305	25.9277	25.7708	25.8001	25.869	25.6974	25.5921	26.2888	25.9477	25.4731	25.5132	25.7606	26.1713	26.0645	25.5624	25.7102	25.9607	25.9211				+							eighthMIC_Ctrl	6	6	6	63	63	63	11.278	0	76.898
25.8104	26.2087	26.0446	26.0807	26.1957	25.9724	26.3322	26.2334	26.3754	26.3472	26.3769	26.2722	26.4567	26.4553	26.4325	26.5704	26.459	26.4594	26.4292	26.3803	26.4458	26.7895	26.4111	26.5878	26.3015	26.4657	26.4118	26.4369	26.4021	26.3237				+	+	+	+				eighthMIC_Ctrl;halfMIC_Ctrl;MIC_Ctrl;quarterMIC_Ctrl	29	29	29	52.7	52.7	52.7	66.246	0	260.8
23.935	24.12	23.8314	24.152	23.9136	23.9611	24.2957	24.1201	24.2862	24.2305	24.435	24.2055	24.3625	24.1768	24.3329	24.5943	24.3445	24.4422	24.326	24.1926	24.298	24.3265	24.2438	24.3911	24.1238	24.2767	24.3419	24.5071	24.337	24.358				+	+	+	+				eighthMIC_Ctrl;halfMIC_Ctrl;MIC_Ctrl;quarterMIC_Ctrl	15	15	15	44.7	44.7	44.7	56.867	0	49.836
27.3084	27.4884	27.528	27.4979	27.7074	27.3577	27.7494	27.621	27.819	27.8115	27.7685	27.7189	27.8867	27.9097	27.8602	27.9269	27.8425	27.9295	27.925	27.8673	27.8972	27.9327	27.9158	27.914	27.7392	27.9758	27.8398	27.8267	27.8948	27.8795				+	+	+	+				eighthMIC_Ctrl;halfMIC_Ctrl;MIC_Ctrl;quarterMIC_Ctrl	25	25	25	70.7	70.7	70.7	35.011	0	313.02
26.5536	26.75	26.4676	26.5565	26.5534	26.5594	26.9416	26.6249	27.0539	26.871	26.9815	26.7847	26.7099	26.6913	26.7091	26.6465	26.679	26.8504	26.6855	26.6887	26.6174	26.9661	26.5435	26.6557	26.6309	26.8379	26.8592	26.7351	26.9143	26.752				+	+	+					eighthMIC_Ctrl;halfMIC_Ctrl;quarterMIC_Ctrl	5	5	5	39.5	39.5	39.5	21.513	0	69.711
24.4332	24.6514	24.4326	24.7215	24.9156	24.7214	24.8973	24.89	25.1174	25.0711	25.0472	24.9438	25.1015	25.0939	24.9926	24.8361	25.1861	24.9754	24.8328	24.802	25.1193	24.8952	25.1015	25.062	24.935	25.1702	24.9721	24.8254	25.15	25.0255				+	+	+	+				eighthMIC_Ctrl;halfMIC_Ctrl;MIC_Ctrl;quarterMIC_Ctrl	6	6	6	32.5	32.5	32.5	26.145	0	46.854
22.4487	22.3269	22.5579	19.9247	22.2648	22.4815	19.0179	20.1486	20.9186	18.8178	20.3325	19.8868	19.7817	19.5476	20.4527	19.8821	19.8676	20.8068	18.5217	20.3761	19.8987	20.1073	21.1152	20.9854	19.6	20.0395	20.9597	20.1005	20.8517	20.2115				+	+	+	+				eighthMIC_Ctrl;halfMIC_Ctrl;MIC_Ctrl;quarterMIC_Ctrl	3	3	3	50	50	50	10.036	0.004363	1.8873
24.7607	25.1884	24.9611	25.0648	25.0239	25.1024	25.3429	25.2079	25.408	25.2907	25.4635	25.1932	25.4246	25.4376	25.4663	25.4711	25.5659	25.5732	25.4591	25.2473	25.3341	25.663	25.6717	25.4128	25.2763	25.552	25.5429	25.2842	25.4551	25.248				+	+	+	+				eighthMIC_Ctrl;halfMIC_Ctrl;MIC_Ctrl;quarterMIC_Ctrl	15	15	15	47.8	47.8	47.8	40.23	0	165.57
21.7442	21.9387	21.7802	21.9383	22.5094	21.9217	21.5533	21.3121	21.5266	21.5325	21.4093	21.5783	21.9774	21.561	21.6352	21.8683	21.609	21.485	21.8478	21.8912	22.0908	21.5074	22.5545	21.8687	21.3834	22.102	21.6499	21.4164	21.5766	21.7333				+		+					eighthMIC_Ctrl;halfMIC_Ctrl	4	4	4	23.1	23.1	23.1	24.004	0	8.9273
27.7505	27.8907	27.6326	28.0385	27.9708	27.7436	28.1365	27.9859	28.0686	28.1815	28.1871	28.2116	28.2524	28.3433	28.1932	28.1048	28.5336	28.4329	28.1036	28.2704	28.1407	28.4505	28.2219	28.4899	28.5367	28.3382	28.2094	28.1223	28.098	28.1466				+	+	+	+				eighthMIC_Ctrl;halfMIC_Ctrl;MIC_Ctrl;quarterMIC_Ctrl	7	7	7	60.2	60.2	60.2	17.71	0	82.172
26.9493	27.2393	26.99	27.103	27.3197	27.0761	26.9141	26.7264	26.9042	26.8092	26.8747	26.8756	27.0539	27.0596	27.003	26.8782	27.1475	27.1422	27.1388	27.063	27.0649	27.0887	27.1226	27.194	26.7157	27.113	27.0606	26.8846	27.0952	26.9929				+							eighthMIC_Ctrl	14	14	14	72.4	72.4	72.4	22.343	0	166.03
28.6983	28.4544	28.8266	28.3913	28.3302	27.9502	27.2005	27.928	27.556	28.2445	27.4273	27.1677	25.808	26.3645	27.0262	27.1448	26.418	26.3547	27.1209	26.8809	26.8868	26.729	26.8733	27.2093	27.748	26.9198	27.5217	27.7831	27.0251	28.0393				+	+	+	+				eighthMIC_Ctrl;halfMIC_Ctrl;MIC_Ctrl;quarterMIC_Ctrl	6	6	6	56.6	56.6	56.6	9.0213	0	27.219
25.6006	24.6676	25.1785	24.6117	24.4324	24.6392	23.8034	24.2818	24.1613	24.2538	23.4228	23.7802	22.3808	23.384	22.8428	23.4144	22.9136	22.7551	23.0809	22.5421	22.5903	22.7336	22.7162	22.582	23.756	23.2339	22.998	24.2508	22.7243	23.5407				+	+	+	+				eighthMIC_Ctrl;halfMIC_Ctrl;MIC_Ctrl;quarterMIC_Ctrl	4	4	4	43.2	43.2	43.2	13.438	0	40.279
24.7843	24.9846	24.7401	25.0153	24.934	24.7903	25.2644	24.8612	25.3295	25.3336	25.2466	25.2936	25.3667	25.3657	25.316	25.4091	25.3381	25.3419	25.4011	25.3	25.2442	25.2733	25.3	25.296	25.0216	25.5212	25.3623	25.1306	25.3843	25.349				+	+	+	+				eighthMIC_Ctrl;halfMIC_Ctrl;MIC_Ctrl;quarterMIC_Ctrl	14	14	14	44.6	44.6	44.6	45.074	0	154.85
20.2262	20.9158	20.7738	21.0757	20.3614	21.0389	20.4821	19.2637	19.5495	19.5695	20.1109	19.9404	20.0043	20.7451	19.1569	20.2245	19.9117	19.286	19.5208	21.1774	21.1058	19.7381	20.2806	20.1294	20.8193	20.3244	20.0806	20.4032	20.1777	19.2608				+		+					eighthMIC_Ctrl;halfMIC_Ctrl	4	4	4	50.4	50.4	50.4	13.672	0	14.581
22.2755	20.5027	22.446	22.2092	22.4238	22.1802	23.183	23.0759	23.0118	23.3664	23.2816	23.4589	23.1466	23.5084	22.9661	23.4223	23.2372	23.3728	22.9845	23.0741	23.0755	21.0396	23.3068	23.0831	22.8373	22.8297	23.4931	22.8713	23.4862	23.0724				+	+	+					eighthMIC_Ctrl;halfMIC_Ctrl;quarterMIC_Ctrl	4	4	4	8.6	8.6	8.6	33.581	0	38.222
26.2299	26.6984	26.3923	26.6105	26.6903	26.578	26.8767	26.7086	26.871	26.8949	27.0185	26.8492	26.9123	26.9562	27.0587	27.0519	26.9872	27.0428	26.936	26.9812	27.0878	27.388	27.026	26.9245	26.723	26.9772	26.9211	26.8387	27.0198	26.9183				+	+	+	+				eighthMIC_Ctrl;halfMIC_Ctrl;MIC_Ctrl;quarterMIC_Ctrl	11	11	11	50	50	50	25.908	0	182.67
22.7113	22.207	22.5428	22.1081	22.1286	22.0607	21.976	21.7404	21.9652	21.8385	21.6198	21.6738	22.1488	21.8975	21.7563	21.5582	21.8101	21.9602	22.0421	22.3753	22.1697	22.0866	22.085	22.2768	21.9101	21.9135	21.7437	21.9078	21.8992	21.9894				+	+	+					eighthMIC_Ctrl;halfMIC_Ctrl;quarterMIC_Ctrl	4	4	4	63.2	63.2	63.2	11.193	0	39.509
24.8464	24.5972	24.5108	24.6509	24.5856	24.6637	24.8401	24.8928	24.9651	24.8432	25.0454	24.7431	25	24.8822	25.0116	25.1701	25.0954	25.125	25.2357	24.9866	25.1204	25.2748	25.1076	25.2857	24.8133	25.1134	24.8769	24.8253	24.964	24.9519				+	+	+	+				eighthMIC_Ctrl;halfMIC_Ctrl;MIC_Ctrl;quarterMIC_Ctrl	24	24	24	43.4	43.4	43.4	84.861	0	131.9
23.3744	22.5997	23.2039	22.7411	22.4631	22.5513	21.9641	22.1183	22.4107	22.2413	22.2788	21.9322	22.1603	21.9642	22.1287	22.1343	22.0062	22.2544	21.8091	22.459	22.4125	22.0114	21.7463	21.7526	22.0799	22.2393	22.1456	22.1449	22.0634	22.3421				+	+	+	+				eighthMIC_Ctrl;halfMIC_Ctrl;MIC_Ctrl;quarterMIC_Ctrl	5	5	5	51.1	51.1	51.1	20.618	0	63.854
20.4497	21.8679	22.4956	21.9968	22.5609	22.2707	23.2536	22.7774	23.2939	23.2326	23.4396	23.3397	22.756	22.8167	22.7005	22.9009	22.8629	23.1859	22.9795	22.8258	22.9026	23.138	23.2267	22.8635	22.6631	23.2032	23.1829	22.8523	23.2943	23.0092				+	+	+	+				eighthMIC_Ctrl;halfMIC_Ctrl;MIC_Ctrl;quarterMIC_Ctrl	7	7	7	27.6	27.6	27.6	40.393	0	41.655
24.5009	25.0975	24.7532	24.9022	25.0937	24.8717	25.2366	25.1225	25.2261	25.2346	25.3266	25.308	25.4258	25.4096	25.373	25.3767	25.4184	25.5331	25.2879	25.302	25.2471	24.8644	25.1786	25.3272	25.0589	25.4459	25.2994	25.2944	25.4271	25.3541				+	+	+	+				eighthMIC_Ctrl;halfMIC_Ctrl;MIC_Ctrl;quarterMIC_Ctrl	21	21	21	50.4	50.4	50.4	56.965	0	147.52
26.0997	26.3177	26.1919	26.3857	26.3864	26.2713	26.4277	26.3895	26.6464	26.5277	26.5987	26.4798	26.5427	26.6281	26.5976	26.6193	26.5779	26.6089	26.6013	26.4297	26.5374	26.214	26.6287	26.6528	26.1783	26.6497	26.6492	26.4441	26.6471	26.4983				+	+	+	+				eighthMIC_Ctrl;halfMIC_Ctrl;MIC_Ctrl;quarterMIC_Ctrl	22	22	22	71.3	71.3	71.3	44.94	0	264.76
30.3063	30.5626	30.2888	30.5736	30.6575	30.5325	30.8242	30.6914	30.7592	30.707	30.878	30.6756	30.858	30.8612	30.9637	30.9247	30.8725	30.957	30.8422	30.8451	30.8852	30.8412	30.8321	30.8681	30.8096	30.9113	30.8267	30.9077	30.8193	30.8838				+	+	+	+				eighthMIC_Ctrl;halfMIC_Ctrl;MIC_Ctrl;quarterMIC_Ctrl	39	39	39	80.7	80.7	80.7	76.612	0	323.31
22.9664	23.0104	22.964	22.8928	22.9999	22.1808	20.857	21.7757	21.9466	22.5555	21.2281	22.1444	22.1042	22.2837	22.0089	22.2269	22.1065	22.1714	21.7737	22.1211	21.4882	21.8703	22.5624	21.9482	22.0245	22.1426	22.1912	22.0433	21.9701	22.283				+	+	+	+				eighthMIC_Ctrl;halfMIC_Ctrl;MIC_Ctrl;quarterMIC_Ctrl	7	7	7	37.2	37.2	37.2	28.419	0	30.903
28.2562	28.3548	28.4086	28.332	28.398	28.2559	27.9718	27.8894	28.2814	28.1739	28.1663	27.9733	28.0449	28.0213	27.823	28.063	27.9893	28.0676	28.2756	28.2706	28.1062	28.2941	28.1519	28.3158	28.2506	27.9876	28.1998	28.0785	28.1671	28.2236				+	+	+	+			+	eighthMIC_Ctrl;halfMIC_Ctrl;MIC_Ctrl;MIC_halfMIC;quarterMIC_Ctrl	8	8	8	61.4	61.4	61.4	14.874	0	83.502
26.0579	25.2177	25.7051	24.9167	24.8251	25.1718	24.4389	24.5655	24.7458	24.4738	24.5934	23.9199	23.8467	23.7749	24.2724	24.6108	23.8545	24.4438	24.2312	24.0557	23.8522	24.4599	24.2293	24.7067	24.1489	23.9528	24.0714	24.4115	24.0527	24.3588				+	+	+	+				eighthMIC_Ctrl;halfMIC_Ctrl;MIC_Ctrl;quarterMIC_Ctrl	3	3	3	43	43	43	10.303	0	32.702
23.751	23.7689	24.2009	23.9366	23.8534	23.8232	23.4874	23.5836	23.6412	23.7446	23.5939	23.4958	23.4648	23.6339	23.6794	23.7838	23.3301	23.6372	23.5847	23.9224	23.873	23.8411	23.8681	23.8127	23.7409	23.6806	23.441	23.7359	23.4778	23.7642				+	+	+					eighthMIC_Ctrl;halfMIC_Ctrl;quarterMIC_Ctrl	14	14	14	52.6	52.6	52.6	45.38	0	91.948
23.1979	23.3713	23.26	23.3092	23.5674	23.2764	22.8924	22.7392	23.2351	23.014	23.1282	22.7302	23.2967	23.3156	23.5092	23.469	23.2964	23.3452	23.438	23.0966	23.5029	23.6835	23.5645	23.6461	22.8677	23.3066	23.3307	23.2434	23.4877	23.2521				+							eighthMIC_Ctrl	8	8	8	44.2	44.2	44.2	35.459	0	34.171
24.7201	24.9445	24.82	24.8582	25.0525	24.7076	25.1308	24.9382	25.1363	25.0832	25.1202	25.286	25.3788	25.285	25.1355	24.9325	25.2266	25.2093	25.3167	25.1819	25.2952	25.3293	25.2656	25.4259	24.8564	25.5163	25.3987	24.8828	25.3085	24.9237				+	+	+	+				eighthMIC_Ctrl;halfMIC_Ctrl;MIC_Ctrl;quarterMIC_Ctrl	10	10	10	59.8	59.8	59.8	20.498	0	81.059
23.6931	23.7	23.7979	23.7675	23.8717	23.3758	24.0125	23.9836	23.9736	24.1452	23.9495	24.4233	24.2583	24.2481	23.9757	23.5638	24.1075	24.0449	24.0869	24.0464	24.2083	24.2816	23.8435	24.1154	24.4991	24.3284	24.0566	24.0181	24.3119	23.9184				+	+	+	+				eighthMIC_Ctrl;halfMIC_Ctrl;MIC_Ctrl;quarterMIC_Ctrl	12	12	12	43.3	43.3	43.3	34.885	0	41.22
23.6601	23.5118	23.8146	23.3254	23.2989	23.1798	22.4401	22.9421	23.2191	22.977	23.0886	22.8467	23.0982	22.9123	22.7291	22.6199	22.8385	22.8299	22.9764	23.2818	23.224	23.1664	23.0078	23.0809	23.1466	22.8925	22.8652	23.1245	22.9287	22.7866				+	+	+	+				eighthMIC_Ctrl;halfMIC_Ctrl;MIC_Ctrl;quarterMIC_Ctrl	8	8	8	30.4	30.4	30.4	29.051	0	13.753
23.792	24.0346	23.3643	24.0329	24.3679	24.0428	23.48	23.2549	23.2799	23.0956	23.4859	23.5717	23.3627	23.0417	23.1318	23.0305	23.3924	23.1533	22.7707	22.7126	22.7851	22.9508	23.0465	22.4192	23.0758	23.5218	23.1063	23.2219	23.5538	22.9784				+	+	+	+				eighthMIC_Ctrl;halfMIC_Ctrl;MIC_Ctrl;quarterMIC_Ctrl	7	7	7	43.7	43.7	43.7	25.25	0	27.579
24.071	24.0781	23.931	24.3129	24.2556	24.0314	24.3544	24.2354	24.3156	24.3694	24.4838	24.444	24.3455	24.5284	24.5218	24.6521	24.5397	24.6321	24.6401	24.2704	24.6064	24.7617	24.6331	24.7172	24.2022	24.5445	24.3934	23.9649	24.4737	24.3131				+		+	+				eighthMIC_Ctrl;halfMIC_Ctrl;MIC_Ctrl	13	13	13	42.7	42.7	42.7	46.308	0	134.27
26.203	26.3017	26.5303	26.2805	26.2941	26.1961	25.9485	26.079	26.0404	26.156	26.1618	26.1117	26.1044	26.2251	26.0754	26.4275	25.9827	26.249	25.9881	26.0693	26.0614	25.9345	26.0274	26.0678	26.289	26.1088	26.1966	26.3813	26.0631	26.2779				+			+				eighthMIC_Ctrl;MIC_Ctrl	33	33	33	58	58	58	55.09	0	323.31
26.0057	26.3552	26.1706	26.4813	26.5087	26.1404	26.6667	26.4865	26.6274	26.5628	26.7299	26.5658	26.6112	26.6806	26.5668	26.7192	26.667	26.8488	26.6077	26.5193	26.5787	26.6075	26.5493	26.555	26.5204	26.6053	26.7551	26.557	26.7792	26.6927				+	+	+	+				eighthMIC_Ctrl;halfMIC_Ctrl;MIC_Ctrl;quarterMIC_Ctrl	16	16	16	71.1	71.1	71.1	26.68	0	212.86
24.8605	25.255	24.9839	25.4034	25.5427	25.2035	25.5996	25.4802	25.6406	25.6201	25.6206	25.6167	25.9523	25.8416	25.8611	25.9242	25.8707	26.053	25.8821	25.7004	25.7867	25.7529	25.8692	25.9366	25.6187	25.9699	25.8471	25.5945	25.8969	25.7501				+	+	+	+				eighthMIC_Ctrl;halfMIC_Ctrl;MIC_Ctrl;quarterMIC_Ctrl	18	18	18	51.9	51.9	51.9	45.76	0	222.09
22.5386	23.0235	22.5877	23.1204	23.0955	22.9402	23.3254	23.3122	23.277	23.3129	23.5923	23.1345	23.3279	23.3424	23.0863	23.5735	23.5153	23.4245	23.4942	23.2575	23.3745	23.5665	23.5764	23.1132	23.2038	23.3494	23.5126	23.3254	23.3637	23.5615				+	+	+	+				eighthMIC_Ctrl;halfMIC_Ctrl;MIC_Ctrl;quarterMIC_Ctrl	8	8	8	53.1	53.1	53.1	27.43	0	42.983
27.236	26.5511	26.764	26.4099	26.273	26.8179	26.1219	26.145	26.1947	26.0931	26.2744	25.7272	25.3943	25.2565	25.3352	25.5739	25.2241	25.5378	25.4486	25.107	25.3944	25.2631	25.4519	25.4323	25.5828	25.4299	25.6981	25.6835	25.5058	25.6653				+	+	+	+	+			eighthMIC_Ctrl;halfMIC_Ctrl;MIC_Ctrl;quarterMIC_Ctrl;quarterMIC_eighthMIC	5	5	5	76.5	76.5	76.5	11.949	0	48.262
26.5175	26.3253	26.0613	26.2429	26.5082	26.2123	26.5064	26.5845	26.6106	26.5644	26.5898	26.6425	26.4738	26.7239	26.902	26.8477	26.8631	26.8379	26.7812	27.0846	27.0846	26.8519	26.6151	27.1609	26.7411	26.4239	26.5478	26.6359	26.5114	26.6274				+	+	+	+				eighthMIC_Ctrl;halfMIC_Ctrl;MIC_Ctrl;quarterMIC_Ctrl	4	4	4	37.9	37.9	37.9	10.175	0	39.478
25.4571	25.6111	25.432	25.7971	25.81	25.6224	25.8347	25.852	25.9584	25.9691	26.0005	25.7627	26.1075	25.991	25.999	26.1269	26.1002	26.1047	26.1582	25.4568	26.1777	25.851	25.9138	25.8928	25.9007	25.9441	26.0532	25.9602	26.101	25.9005				+	+	+	+				eighthMIC_Ctrl;halfMIC_Ctrl;MIC_Ctrl;quarterMIC_Ctrl	13	13	13	44.2	44.2	44.2	35.283	0	314.63
24.0777	24.1188	24.2671	24.055	24.3056	24.3924	23.341	23.5594	23.7118	23.7607	24.1942	23.8547	23.5916	23.627	23.906	23.7517	23.862	23.9094	23.6663	23.4955	23.9496	23.5401	24.1057	23.5746	23.4835	23.8664	23.8372	23.6402	23.6704	23.8703				+	+	+	+				eighthMIC_Ctrl;halfMIC_Ctrl;MIC_Ctrl;quarterMIC_Ctrl	5	5	5	57	57	57	16.277	0	72.146
21.3685	21.5069	21.4957	21.895	21.4786	21.6449	21.9255	21.7357	21.8483	21.8997	21.8045	22.072	22.3406	22.2087	22.0625	22.0839	22.4734	21.5828	22.0539	21.8927	21.9036	22.4691	21.9095	22.1104	21.6574	22.5467	22.1593	22.1417	22.1905	22.0246				+	+	+	+				eighthMIC_Ctrl;halfMIC_Ctrl;MIC_Ctrl;quarterMIC_Ctrl	4	4	4	37.5	37.5	37.5	11.568	0	12.988
27.244	27.6344	27.4962	27.6586	27.7858	27.6116	27.3359	27.0822	27.2966	27.3192	27.2603	27.3247	27.4324	27.3159	27.3401	27.3719	27.3357	27.3901	27.2159	27.1859	27.2394	27.5625	27.3897	27.4869	27.18	27.4727	27.3614	27.1934	27.3051	27.1348				+	+	+	+				eighthMIC_Ctrl;halfMIC_Ctrl;MIC_Ctrl;quarterMIC_Ctrl	12	12	12	52.1	52.1	52.1	32.176	0	208.42
26.3365	26.6252	26.3542	26.7725	26.7563	26.6227	26.9201	26.7553	26.9105	26.8344	26.9304	26.8715	27.0126	27.0792	27.0188	27.1041	27.0445	27.0997	27.0274	26.9507	26.8825	26.988	27.0457	27.061	26.7846	26.9468	26.9837	26.913	27.0144	26.9117				+	+	+	+				eighthMIC_Ctrl;halfMIC_Ctrl;MIC_Ctrl;quarterMIC_Ctrl	28	28	28	65.8	65.8	65.8	63.862	0	250.9
25.0466	25.2996	24.9668	25.4925	25.4709	25.3283	25.753	25.4904	25.6081	25.5844	25.6751	25.5445	25.8402	25.7631	25.9679	25.8019	25.8446	25.9239	25.8259	25.8441	25.8502	26.0635	25.8388	26.0591	25.6999	25.8187	25.7344	25.8103	25.7407	25.7021				+	+	+	+				eighthMIC_Ctrl;halfMIC_Ctrl;MIC_Ctrl;quarterMIC_Ctrl	13	13	13	35.2	35.2	35.2	73.924	0	283.83
29.4138	29.2328	29.4586	29.3783	29.2884	29.3351	28.9991	29.1251	29.2823	29.2535	29.1901	29.0452	29.1354	29.1508	29.1625	29.3462	29.1618	29.0949	29.4018	29.4764	29.4968	29.4047	29.2188	29.3663	29.2596	28.9725	29.1744	29.2882	29.1183	29.2399				+	+	+					eighthMIC_Ctrl;halfMIC_Ctrl;quarterMIC_Ctrl	12	12	12	74.5	74.5	74.5	11.333	0	178.35
20.2169	20.0998	20.1759	20.2363	20.3474	19.5981	20.4403	20.672	20.4695	20.4889	20.5636	20.438	20.6526	20.3935	20.542	20.6511	20.498	21.0314	20.553	20.2914	20.3933	20.4855	20.412	20.4077	20.3312	20.5245	20.553	19.9806	20.4776	20.6598				+		+	+				eighthMIC_Ctrl;halfMIC_Ctrl;MIC_Ctrl	4	4	4	9.5	9.5	9.5	56.517	0	10.556
26.1912	26.2395	26.1808	26.0451	26.0679	25.9888	25.9059	25.8107	26.0748	25.9432	25.9154	25.7119	25.7253	25.8521	25.8752	26.0771	25.832	26.0024	25.9258	25.8852	25.8595	25.83	26.0219	26.1233	25.7428	25.7636	25.9387	25.9152	25.8495	25.9331				+	+	+	+				eighthMIC_Ctrl;halfMIC_Ctrl;MIC_Ctrl;quarterMIC_Ctrl	11	11	11	45.7	45.7	45.7	34.878	0	227.73
24.8225	24.9732	24.8883	25.0199	25.3194	24.96	24.695	24.6047	24.7811	24.79	24.7668	24.7496	24.8798	24.8768	24.8651	24.8576	24.8389	24.9808	25.0646	24.9747	24.9794	25.0578	25.0008	24.9887	24.7933	24.8943	24.7509	24.797	24.8417	24.7874				+	+					+	eighthMIC_Ctrl;MIC_halfMIC;quarterMIC_Ctrl	10	10	10	55.7	55.7	55.7	25.285	0	77.237
23.0926	23.2509	23.4656	23.4227	23.4912	23.26	23.506	23.5098	23.6961	23.7514	23.6075	23.5189	23.6164	23.7483	23.7149	23.6452	23.7996	23.8634	23.8349	23.5454	23.8449	23.6792	23.6985	23.6536	23.3207	23.5388	23.8277	22.9158	23.8942	23.7802				+		+	+				eighthMIC_Ctrl;halfMIC_Ctrl;MIC_Ctrl	10	10	10	61.4	61.4	61.4	23.505	0	57.083
22.2187	22.1865	22.0333	22.5581	22.6433	22.4745	21.8925	21.9012	22.1891	21.9024	21.7592	22.0542	22.2999	21.9612	22.2494	22.0835	22.2467	22.3076	22.5501	21.9401	22.5065	22.4964	22.4502	22.4953	21.8771	22.1738	22.1669	22.1389	22.1928	22.2508				+							eighthMIC_Ctrl	7	7	7	51.7	51.7	51.7	25.239	0	26.852
26.6695	26.9421	26.8274	26.955	27.0372	26.8622	27.0664	26.9673	27.1892	27.1314	27.2254	27.064	27.2581	27.1901	27.1838	27.3037	27.1654	27.3307	27.3433	27.15	27.1953	27.3658	27.2589	27.2457	26.9936	27.1009	27.3004	27.0859	27.2298	27.2141				+	+	+	+				eighthMIC_Ctrl;halfMIC_Ctrl;MIC_Ctrl;quarterMIC_Ctrl	39	39	39	59.6	59.6	59.6	77.361	0	200.07
21.4482	21.1015	21.1028	21.225	21.3663	21.6498	20.7115	21.0946	21.1377	20.956	20.7102	20.8791	20.8833	21.0188	20.7094	20.9193	20.7369	20.7102	20.9335	21.088	21.4247	21.0313	21.3932	20.8861	20.9123	20.8557	20.8067	20.5414	20.8596	20.8493				+	+	+					eighthMIC_Ctrl;halfMIC_Ctrl;quarterMIC_Ctrl	5	5	5	14.1	14.1	14.1	58.439	0	14.629
24.9252	24.4289	24.1844	24.4369	24.927	25.0353	24.7253	25.8974	25.4361	25.3273	25.3306	25.7409	24.4701	24.7029	24.5516	23.8849	24.6372	23.5082	23.5801	24.3081	24.1041	23.0705	20.6329	23.5818	26.0213	24.571	24.1513	25.2138	24.6308	24.3224				+			+				eighthMIC_Ctrl;MIC_Ctrl	5	5	5	52.1	52.1	52.1	10.416	0	69.835
25.9777	24.7903	24.4315	24.7018	23.1033	24.593	23.174	19.4315	22.5597	22.9041	22.5457	22.9108	20.4305	20.2785	20.4774	21.0658	20.3158	20.2787	19.8428	21.1496	20.1032	20.5805	20.3096	21.1541	21.8049	21.437	21.2431	22.658	21.4834	22.1753				+	+	+	+		+		eighthMIC_Ctrl;halfMIC_Ctrl;halfMIC_quarterMIC;MIC_Ctrl;quarterMIC_Ctrl	2	2	2	62	62	62	5.9362	0	44.644
26.1075	25.9813	26.4425	26.1248	26.0516	26.2561	26.4376	26.5616	26.4454	26.2424	26.4867	26.4349	25.9095	26.1984	26.07	26.2022	26.028	26.2643	26.0084	26.362	26.0476	26.1647	25.7757	26.1796	26.4259	25.8729	26.122	26.3992	26.1075	26.4567				+							eighthMIC_Ctrl	4	4	4	43.8	43.8	43.8	11.597	0	33.211
22.3947	22.5601	22.2173	22.3576	22.4542	22.3417	22.7525	22.4017	22.6798	22.7345	22.6898	22.5491	22.9506	22.9118	22.6383	22.7526	22.8155	22.8782	22.9844	22.7339	22.9906	22.6989	22.9174	22.9048	22.2291	22.8215	22.874	22.8199	22.7028	22.7416				+	+	+	+				eighthMIC_Ctrl;halfMIC_Ctrl;MIC_Ctrl;quarterMIC_Ctrl	11	11	11	15.5	15.5	15.5	74.362	0	15.686
26.6082	26.231	26.6067	26.1686	25.9166	26.2295	25.8703	25.9023	25.9716	25.9559	25.9393	25.8191	25.2892	25.5246	25.3028	25.7027	25.5698	25.4101	25.5168	25.6568	25.6699	25.5106	25.3108	25.5321	25.7986	25.553	25.5172	25.9129	25.5934	25.9248				+	+	+	+				eighthMIC_Ctrl;halfMIC_Ctrl;MIC_Ctrl;quarterMIC_Ctrl	8	8	8	84.4	84.4	84.4	15.122	0	259.5
28.9273	29.1807	28.9309	29.2051	29.2632	29.0844	29.2962	29.1965	29.4182	29.3393	29.4556	29.3037	29.5107	29.4845	29.4849	29.5949	29.489	29.5503	29.486	29.403	29.3799	29.5309	29.4738	29.5727	29.3232	29.4749	29.441	29.3926	29.4871	29.4508				+	+	+	+				eighthMIC_Ctrl;halfMIC_Ctrl;MIC_Ctrl;quarterMIC_Ctrl	86	86	86	72.8	72.8	72.8	135.41	0	323.31
22.3885	22.7404	22.3014	22.4984	22.417	22.5337	22.6837	22.7054	22.8451	22.7707	22.9789	22.5891	23.1895	23.3679	22.9642	23.2689	23.2232	23.263	23.1755	21.9222	22.7024	21.6308	23.4339	22.8001	22.6993	23.3411	23.0792	22.848	23.2099	22.9341				+	+	+					eighthMIC_Ctrl;halfMIC_Ctrl;quarterMIC_Ctrl	4	4	4	41.3	41.3	41.3	17.627	0	17.252
30.4122	30.1603	30.1511	30.0909	29.9445	30.0751	30.3478	30.5235	30.443	30.1925	30.526	30.4498	30.1427	30.4072	30.4111	30.3537	30.3647	30.3826	30.4564	30.3748	30.3646	30.4277	30.2234	30.2441	30.4059	30.2911	30.2693	30.5579	30.1763	30.3326				+	+	+	+				eighthMIC_Ctrl;halfMIC_Ctrl;MIC_Ctrl;quarterMIC_Ctrl	14	14	14	93.4	93.4	93.4	12.711	0	256.96
28.8745	29.0108	28.8851	29.062	29.0523	28.945	29.204	29.0601	29.2014	29.2747	29.2756	28.9914	29.2271	29.2969	29.3122	29.4003	29.3114	29.4051	29.2777	29.1749	29.1644	28.9417	29.2012	29.3313	29.1584	29.2828	29.3288	29.2721	29.2564	29.3314				+	+	+	+				eighthMIC_Ctrl;halfMIC_Ctrl;MIC_Ctrl;quarterMIC_Ctrl	31	31	31	62	62	62	55.998	0	323.31
22.2555	22.4168	21.7915	22.3791	22.3515	22.2583	21.8729	21.864	21.7218	21.9954	22.0604	21.7495	22.2341	22.0099	22.0249	22.4871	22.0221	22.4167	22.374	22.1093	22.3512	22.4412	22.3546	22.6117	21.7846	22.0979	22.1806	22.0071	22.5861	19.1039				+							eighthMIC_Ctrl	6	6	6	39.3	39.3	39.3	23.57	0	36.632
24.4364	24.8727	24.4881	24.9419	25.11	24.7323	25.16	25.0845	25.2034	25.1318	25.1852	25.0445	25.3231	25.2806	25.318	25.4039	25.1524	25.4212	25.4111	25.3265	25.612	25.3716	25.2514	25.4609	25.002	25.3604	25.3465	25.192	25.3979	25.2815				+	+	+	+				eighthMIC_Ctrl;halfMIC_Ctrl;MIC_Ctrl;quarterMIC_Ctrl	19	19	19	43.5	43.5	43.5	65.502	0	87.095
21.0949	21.5434	21.3397	21.2775	21.3543	21.2038	21.1224	21.0694	21.1163	20.6775	21.0311	20.7322	21.0745	20.946	21.118	20.7111	21.158	21.862	21.3277	21.0955	21.0059	21.1502	21.313	21.1729	20.9971	20.9928	20.2713	20.337	21.2687	21.1057				+	+						eighthMIC_Ctrl;quarterMIC_Ctrl	3	3	3	17.8	17.8	17.8	25.799	0	39.419
26.2443	26.4462	26.4043	26.5359	26.561	26.4324	26.5627	26.5071	26.7684	26.7933	26.7828	26.6026	26.6555	26.661	26.7955	26.8908	26.7981	26.8344	26.7475	26.6634	26.7024	26.8805	26.6532	26.6943	26.6356	26.5441	26.8054	26.7482	26.7789	26.7873				+	+	+	+				eighthMIC_Ctrl;halfMIC_Ctrl;MIC_Ctrl;quarterMIC_Ctrl	16	16	16	60.9	60.9	60.9	31.542	0	150.23
27.7761	28.2182	27.8941	28.2022	28.3363	28.0668	28.3813	28.2046	28.3979	28.5379	28.4844	28.4672	28.6146	28.5705	28.4976	28.6162	28.5531	28.665	28.6108	28.3122	28.3585	28.3961	28.4606	28.6061	28.2623	28.4846	28.6401	28.3738	28.5477	28.5201				+	+	+	+				eighthMIC_Ctrl;halfMIC_Ctrl;MIC_Ctrl;quarterMIC_Ctrl	25	25	25	58.7	58.7	58.7	50.84	0	265.86
24.9083	25.49	25.0678	25.4151	25.5795	25.3576	25.5904	25.6031	25.7226	25.6469	25.7708	25.6749	25.8825	25.9891	25.9681	25.9554	25.9255	26.0331	25.9475	25.781	25.8778	25.9936	25.8685	25.9836	25.6308	25.8131	25.8237	25.7272	25.9434	25.9291				+	+	+	+				eighthMIC_Ctrl;halfMIC_Ctrl;MIC_Ctrl;quarterMIC_Ctrl	16	16	16	48.1	48.1	48.1	50.049	0	153.98
25.3238	25.6707	25.3297	25.6734	25.6919	25.3689	25.9376	25.6655	25.8358	25.7402	25.8862	25.7259	25.9561	25.9952	26.0582	26.0728	26.003	26.109	25.9527	26.0209	25.9901	26.162	26.1012	26.1077	25.7747	25.981	25.9114	25.8824	25.9186	25.8737				+	+	+	+				eighthMIC_Ctrl;halfMIC_Ctrl;MIC_Ctrl;quarterMIC_Ctrl	23	23	23	41.5	41.5	41.5	88.92	0	302.65
24.0625	24.0507	24.0736	24.061	24.1808	24.1602	23.9964	23.6789	24.0514	23.837	23.9742	23.8531	23.9061	23.8198	23.8892	24.0083	24.0517	24.194	24.0897	23.9086	24.1296	24.2481	24.2052	24.0776	23.7587	23.9613	23.9918	23.9793	23.9836	23.9207				+	+	+					eighthMIC_Ctrl;halfMIC_Ctrl;quarterMIC_Ctrl	13	13	13	46.4	46.4	46.4	42.109	0	111.8
25.6101	25.8621	25.7788	25.9276	25.9839	25.8904	26.0379	25.8622	26.1895	26.1205	26.246	26.1236	26.1676	26.1351	26.0587	26.3554	26.1997	26.1866	26.1071	26.09	26.0589	26.4685	26.1912	26.2189	25.9152	26.0754	26.2086	26.0558	26.2567	26.1606				+	+	+	+				eighthMIC_Ctrl;halfMIC_Ctrl;MIC_Ctrl;quarterMIC_Ctrl	13	13	13	37.3	37.3	37.3	54.67	0	323.31
23.928	19.711	24.2698	21.5664	21.4438	21.9318	18.4065	19.4297	20.0846	19.2149	20.8489	19.6494	18.6143	20.4472	21.786	19.8632	19.1423	19.5269	21.1977	19.7345	19.758	20.5071	19.5136	21.0673	19.2195	19.5322	19.3489	19.3543	19.4062	20.0966				+	+	+	+				eighthMIC_Ctrl;halfMIC_Ctrl;MIC_Ctrl;quarterMIC_Ctrl	3	3	3	16.6	16.6	16.6	28.186	0	31.075
30.2078	30.5271	30.1411	30.3916	30.2476	30.3124	30.5798	30.4509	30.5628	30.573	30.7211	30.3879	30.4448	30.4226	30.5612	30.629	30.5257	30.6264	30.5144	30.5865	30.5362	30.4243	30.2972	30.3667	30.5796	30.4966	30.606	30.5833	30.384	30.7734				+	+	+	+				eighthMIC_Ctrl;halfMIC_Ctrl;MIC_Ctrl;quarterMIC_Ctrl	23	23	23	82.1	82.1	82.1	36.28	0	323.31
24.18	24.3122	24.0642	24.2539	24.3585	24.2011	24.3937	24.2664	24.4768	24.4306	24.4779	24.3744	24.4735	24.6184	24.4739	24.6496	24.6385	24.6769	24.5117	24.4114	24.5927	24.8798	24.8402	24.7176	24.3038	24.6813	24.659	24.4852	24.5412	24.4902				+	+	+	+				eighthMIC_Ctrl;halfMIC_Ctrl;MIC_Ctrl;quarterMIC_Ctrl	13	13	13	39	39	39	42.15	0	54.884
29.4581	29.0331	29.2915	28.8838	28.6568	28.932	28.5062	28.58	28.7477	28.6309	28.7373	28.1643	28.2406	28.5215	28.6038	28.7194	28.496	28.724	28.789	28.783	28.8864	28.5022	28.3328	28.9544	28.5617	28.1994	28.4136	28.7268	28.3628	28.6924				+	+	+	+				eighthMIC_Ctrl;halfMIC_Ctrl;MIC_Ctrl;quarterMIC_Ctrl	4	4	4	61.9	61.9	61.9	9.7228	0	73.508
22.3339	22.6915	22.4948	22.5579	22.4681	22.3398	22.0626	22.0828	22.2412	22.3539	22.2796	22.3635	22.2406	21.9677	22.0476	22.2478	22.1086	22.2527	22.3648	21.9824	21.6673	22.1329	22.4384	22.2039	22.1131	22.022	22.342	22.2232	22.3017	22.369				+	+	+	+				eighthMIC_Ctrl;halfMIC_Ctrl;MIC_Ctrl;quarterMIC_Ctrl	4	4	4	26	26	26	20.588	0	7.1658
25.7668	25.6833	25.7071	25.6546	25.9515	25.7668	26.0122	25.7706	26.0483	25.9254	25.9518	25.9616	25.874	25.8622	25.9054	25.9446	25.8717	25.9346	25.8758	25.9019	25.8578	25.76	25.8606	26.1343	25.8907	25.9108	25.8287	25.9409	26.0282	25.891				+	+	+	+				eighthMIC_Ctrl;halfMIC_Ctrl;MIC_Ctrl;quarterMIC_Ctrl	14	14	14	58.2	58.2	58.2	35.43	0	146.08
26.1097	26.4574	26.099	26.6972	26.7165	26.7378	26.9185	26.6517	27.0021	26.8745	27.1347	26.9399	27.0486	27.0208	27.133	26.9998	27.1731	27.3418	27.1957	26.9956	27.1149	27.2665	27.0196	27.1363	26.7116	27.0893	27.2179	26.8196	27.0924	27.0447				+	+	+	+				eighthMIC_Ctrl;halfMIC_Ctrl;MIC_Ctrl;quarterMIC_Ctrl	7	7	7	33.3	33.3	33.3	35.947	0	25.571
23.5687	23.6916	23.6501	23.5083	23.4944	23.4448	23.8473	23.5235	23.8019	23.7498	23.9021	23.8383	23.5329	23.8085	23.796	23.6572	23.6509	23.768	23.8383	23.6868	23.8746	23.5652	23.5806	23.8863	23.6384	23.9363	23.9565	23.8203	23.8634	23.6713				+	+	+	+				eighthMIC_Ctrl;halfMIC_Ctrl;MIC_Ctrl;quarterMIC_Ctrl	8	8	8	27.7	27.7	27.7	39.536	0	23.575
24.1031	23.5383	23.9505	23.5418	23.7065	23.3203	23.2098	23.1396	23.4497	23.3958	23.3002	23.1575	23.5342	23.3534	23.5255	23.4749	23.3898	23.3568	23.2531	23.544	23.6473	23.2233	23.9457	23.3303	23.4485	23.463	23.5502	23.4718	23.3813	23.5734				+		+					eighthMIC_Ctrl;halfMIC_Ctrl	11	11	11	51.3	51.3	51.3	31.088	0	31.426
18.9768	18.6546	21.5529	18.8398	18.301	18.3623	21.4206	21.7925	20.2402	21.441	19.7834	21.8615	19.6759	20.7895	19.6013	19.3559	20.6491	19.4426	17.6879	18.3646	18.7203	19.5447	17.8783	18.6502	21.3274	20.3822	19.9721	21.2624	19.8924	20.1007				+	+						eighthMIC_Ctrl;quarterMIC_Ctrl	5	5	5	18.5	18.5	18.5	26.687	0	24.186
20.9785	23.3274	20.8792	23.3328	23.7872	22.7346	21.4732	20.4215	20.3807	20.4369	20.7177	21.0352	20.0238	20.2011	20.0341	20.0507	20.1944	20.1871	20.2216	20.5524	20.1034	20.4864	20.0829	20.2903	19.6265	20.8028	20.4221	20.2713	21.32	19.71				+	+	+	+				eighthMIC_Ctrl;halfMIC_Ctrl;MIC_Ctrl;quarterMIC_Ctrl	5	5	5	50.3	50.3	50.3	16.691	0	54.061
22.2367	22.7847	22.4158	22.8039	23.11	22.3001	23.0615	22.9403	23.4206	22.9131	23.1695	23.274	23.3677	22.8648	22.9507	22.978	23.3826	23.2477	23.0997	23.0611	23.1544	23.2891	22.8147	23.3404	22.9285	23.2233	22.9669	22.8443	23.36	23.0036				+	+	+	+				eighthMIC_Ctrl;halfMIC_Ctrl;MIC_Ctrl;quarterMIC_Ctrl	6	6	6	31.3	31.3	31.3	27.165	0	13.228
29.7081	29.479	29.4283	29.4129	29.4559	29.4609	29.2359	29.186	29.3337	29.2763	29.4841	29.2204	28.6287	28.9338	28.9368	28.8163	29.0674	29.1257	28.9787	29.3267	29.2706	28.7509	28.7626	29.2701	29.3239	29.1192	29.0874	29.3436	29.0219	29.1967				+	+	+	+				eighthMIC_Ctrl;halfMIC_Ctrl;MIC_Ctrl;quarterMIC_Ctrl	10	10	10	64.5	64.5	64.5	19.191	0	155.8
28.3416	28.6535	28.3943	28.6155	28.7275	28.4646	28.7462	28.6018	28.8491	28.8739	28.8719	28.7299	28.9438	28.9379	28.8839	28.9807	28.9358	29.0238	28.9207	28.8475	28.9219	28.8053	28.9134	29.0148	28.766	28.9297	28.9468	28.8994	28.9523	28.9635				+	+	+	+				eighthMIC_Ctrl;halfMIC_Ctrl;MIC_Ctrl;quarterMIC_Ctrl	71	71	71	68	68	68	133.22	0	323.31
29.3731	29.523	29.4695	29.7501	29.693	29.5527	29.7876	29.6535	29.7842	29.778	29.8717	29.7249	29.8617	29.9825	29.8961	30.0303	30.0196	30.0704	29.9818	29.887	29.9607	29.9753	30.0192	30.1251	29.7098	29.9901	29.9358	29.8887	29.8279	29.8353				+	+	+	+				eighthMIC_Ctrl;halfMIC_Ctrl;MIC_Ctrl;quarterMIC_Ctrl	26	26	26	71.4	71.4	71.4	46.354	0	323.31
24.934	25.0886	25.0398	25.3307	25.1379	25.0002	25.3754	25.2493	25.3371	25.1825	25.5115	25.2796	25.5879	25.5244	25.6166	25.592	25.4975	25.6527	25.6317	25.4684	25.451	25.8262	25.8021	25.8303	25.1663	25.5766	25.4627	25.385	25.5888	25.3429				+	+	+	+				eighthMIC_Ctrl;halfMIC_Ctrl;MIC_Ctrl;quarterMIC_Ctrl	13	13	13	67.6	67.6	67.6	20.154	0	80.001
23.3035	22.4454	22.9403	22.4449	19.1303	22.607	19.9697	19.8754	20.8109	19.1686	20.4688	19.9832	20.1074	20.8846	19.8839	22.9821	20.3504	20.1314	20.2451	22.1595	20.9651	20.6431	20.8596	21.1649	21.9257	19.3234	21.1721	20.7955	17.7095	19.9834				+	+						eighthMIC_Ctrl;quarterMIC_Ctrl	2	2	2	23.1	23.1	23.1	16.87	0	4.3472
27.2687	27.0388	27.559	27.0944	26.4974	26.7754	26.3273	26.6944	26.2455	26.8318	26.4188	26.2677	25.0222	25.9669	25.7174	25.7874	25.566	25.4646	25.1671	25.2706	25.4787	24.8904	24.9231	25.1077	26.8616	25.4369	25.9255	26.6678	25.542	26.657				+	+	+	+				eighthMIC_Ctrl;halfMIC_Ctrl;MIC_Ctrl;quarterMIC_Ctrl	16	16	16	84.9	84.9	84.9	13.097	0	114.06
25.1731	25.578	25.3768	25.584	25.6742	25.3994	25.1929	24.9838	25.2785	25.2096	25.2763	25.2025	25.394	25.3009	25.1786	25.242	25.297	25.3065	25.2728	25.2414	25.23	25.2968	25.3461	25.4077	25.0739	25.2975	25.3942	25.1441	25.4037	25.2356				+		+	+				eighthMIC_Ctrl;halfMIC_Ctrl;MIC_Ctrl	11	11	11	55.6	55.6	55.6	21.916	0	58.228
23.0719	23.4372	23.1996	23.4644	23.181	23.5064	23.7089	23.4472	23.6618	23.628	23.6918	23.4216	23.7222	23.9115	23.7854	23.8245	23.6511	24.1055	23.7511	23.8583	23.9298	23.6998	23.6633	23.752	23.4903	23.8598	23.7322	23.6493	23.8402	23.6313				+	+	+	+				eighthMIC_Ctrl;halfMIC_Ctrl;MIC_Ctrl;quarterMIC_Ctrl	10	10	10	30.3	30.3	30.3	51.741	0	51.586
25.2387	25.4263	25.2418	25.4572	25.5044	25.3347	25.5999	25.4551	25.5941	25.5684	25.5584	25.4447	25.6709	25.6543	25.667	25.7843	25.6687	25.7674	25.5175	25.543	25.6374	25.7892	25.6526	25.3892	25.53	25.6303	25.6843	25.531	25.6245	25.6262				+	+	+	+				eighthMIC_Ctrl;halfMIC_Ctrl;MIC_Ctrl;quarterMIC_Ctrl	31	31	31	44.1	44.1	44.1	114.42	0	323.31
23.7884	23.4372	23.4591	23.5888	23.2447	23.4516	23.3757	23.028	23.2298	23.1498	23.2234	23.2992	22.7871	22.8324	23.1569	23.2209	23.12	23.0875	23.1839	23.2664	23.2738	23.5536	23.1518	23.2305	23.2387	23.114	22.9671	23.1134	22.9861	22.9421				+	+	+	+				eighthMIC_Ctrl;halfMIC_Ctrl;MIC_Ctrl;quarterMIC_Ctrl	13	13	13	22.3	22.3	22.3	77.237	0	23.996
22.5217	22.5678	22.39	22.6643	23.3516	22.5895	23.1026	23.2149	23.0671	23.1243	23.5002	23.004	23.3489	23.1871	23.0112	22.8302	23.1685	23.1438	23.2176	23.0383	23.2534	23.9064	23.3171	23.2946	22.6616	23.3733	23.4486	22.8876	23.1952	23.301				+	+	+	+				eighthMIC_Ctrl;halfMIC_Ctrl;MIC_Ctrl;quarterMIC_Ctrl	5	5	5	24.1	24.1	24.1	28.641	0	25.713
22.0957	21.8927	22.1724	21.9761	22.4409	22.3268	21.4643	22.0241	21.8525	21.8437	21.7121	21.8786	22.231	22.2125	22.1883	22.2536	22.1525	22.2795	22.67	22.325	22.4842	22.3533	23.0096	18.9016	21.7671	22.0995	22.3273	22.1069	22.0867	22.4853				+							eighthMIC_Ctrl	3	3	3	31.8	31.8	31.8	17.183	0	9.0764
29.603	28.6443	29.4286	28.662	28.1076	28.5913	27.9351	28.3987	27.9756	27.9997	28.228	28.021	18.8451	21.1026	24.1204	22.4434	20.6109	23.1978	20.3164	19.9409	19.629	23.4505	20.915	19.4892	26.9673	25.9246	25.9946	26.612	26.0145	26.2257				+	+	+	+	+	+		eighthMIC_Ctrl;halfMIC_Ctrl;halfMIC_quarterMIC;MIC_Ctrl;quarterMIC_Ctrl;quarterMIC_eighthMIC	4	4	4	61.3	61.3	61.3	8.4222	0	34.092
23.9354	24.3541	23.8779	24.0687	24.2622	24.0974	24.4549	24.2532	24.41	24.4047	24.368	24.2384	24.4322	24.5411	24.6407	24.4769	24.3782	24.5786	24.2541	24.319	24.4021	24.5532	24.2046	24.5101	23.9628	24.4796	24.3657	24.4102	24.5195	24.3033				+		+	+				eighthMIC_Ctrl;halfMIC_Ctrl;MIC_Ctrl	8	8	8	52	52	52	22.371	0	76.705
27.5106	27.6234	27.8347	27.7183	27.5847	27.057	27.8043	28.3067	27.8895	27.9805	27.7475	28.2548	27.6666	27.8768	27.3339	27.1241	27.6555	27.4669	26.8118	27.3084	27.2589	26.9014	27.4782	26.9795	28.061	27.9703	27.8206	27.9759	27.8673	27.7898				+	+		+				eighthMIC_Ctrl;MIC_Ctrl;quarterMIC_Ctrl	18	18	18	77	77	77	24.708	0	140.54
26.1557	26.1535	26.0584	26.1462	26.2452	25.9439	25.9264	25.5865	25.9919	25.7816	26.0712	25.853	25.7218	25.7945	25.9196	26.0021	25.87	25.9496	25.8796	25.7951	25.7467	26.0465	25.8422	26.1606	25.7158	25.8649	25.9836	25.8059	25.8466	25.7871				+	+	+	+				eighthMIC_Ctrl;halfMIC_Ctrl;MIC_Ctrl;quarterMIC_Ctrl	8	8	8	59	59	59	17.96	0	76.813
24.2971	24.795	24.5267	24.9019	24.775	24.4352	24.9489	24.9022	24.9541	24.9272	25.0693	24.8067	25.0227	25.03	25.0159	25.2575	24.9424	25.2666	25.2096	25.1255	25.1841	25.2308	25.1634	25.2466	24.7562	25.1753	25.0698	24.9451	25.0657	25.0522				+	+	+	+				eighthMIC_Ctrl;halfMIC_Ctrl;MIC_Ctrl;quarterMIC_Ctrl	11	11	11	51.8	51.8	51.8	34.604	0	51.557
22.3614	22.6495	22.4726	22.6648	22.8023	22.3732	23.0007	22.6689	22.7856	22.693	23.1254	22.9594	22.8349	22.7457	22.8298	23.0336	22.8615	23.0939	23.2697	22.4452	22.6222	22.4166	22.7218	23.1852	22.4194	23.2457	23.3343	22.8926	23.1488	23.094				+	+	+					eighthMIC_Ctrl;halfMIC_Ctrl;quarterMIC_Ctrl	6	6	6	34.4	34.4	34.4	23.545	0	42.715
23.5595	23.1032	22.6718	22.9338	22.5976	22.9255	21.678	22.193	19.8117	21.5555	22.6924	19.0868	21.5075	21.7049	22.059	22.2514	21.8527	21.8119	20.2768	22.7793	23.3268	23.2214	22.2233	23.0172	21.8979	21.4622	21.5337	21.8842	21.4952	21.8374				+	+	+					eighthMIC_Ctrl;halfMIC_Ctrl;quarterMIC_Ctrl	10	10	10	25.5	25.5	25.5	50.07	0	48.72
22.8708	23.205	22.6495	23.1398	23.1911	23.0779	23.3305	23.2211	23.4198	23.2058	23.3975	23.3051	23.2096	23.0084	23.1943	23.2618	22.993	23.2523	23.1917	23.2846	23.1578	23.4347	23.4018	23.542	22.9371	23.2118	23.3195	22.8194	23.3761	23.2395				+			+				eighthMIC_Ctrl;MIC_Ctrl	3	3	3	31.2	31.2	31.2	16.396	0	39.174
20.5669	20.0696	20.7513	19.521	21.3346	20.3952	21.199	21.2494	21.425	21.2148	21.1654	21.0302	21.5321	21.1167	21.6692	21.6503	21.6858	18.0279	21.5888	21.1054	21.3025	22.1201	21.9355	21.3314	20.7426	21.496	21.344	21.0439	21.3397	21.1299				+	+		+				eighthMIC_Ctrl;MIC_Ctrl;quarterMIC_Ctrl	6	6	6	15.4	15.4	15.4	60.647	0	19.643
21.9168	22.2237	21.8037	21.6728	21.9455	21.8994	22.3936	22.0857	22.122	22.0986	22.261	22.1172	22.4845	22.3748	22.3343	22.7133	22.569	22.3062	22.3437	22.5032	22.3862	22.3733	22.593	22.5766	22.0272	22.4922	22.3494	22.0321	22.3935	22.1093				+	+	+	+				eighthMIC_Ctrl;halfMIC_Ctrl;MIC_Ctrl;quarterMIC_Ctrl	6	6	6	18	18	18	45.487	0	52.219
25.906	26.2995	25.8521	26.1593	26.3589	26.0118	26.4666	26.2446	26.3049	26.3692	26.4414	26.4128	26.5704	26.5187	26.5307	26.5351	26.5518	26.5932	26.566	26.568	26.4819	26.6915	26.4613	26.4982	26.3557	26.5388	26.4908	26.4289	26.5299	26.39				+	+	+	+				eighthMIC_Ctrl;halfMIC_Ctrl;MIC_Ctrl;quarterMIC_Ctrl	17	17	17	50.8	50.8	50.8	42.056	0	159.3
23.0355	22.5063	21.8344	21.4659	21.0376	22.7233	20.9376	21.2282	21.1035	21.0858	21.4897	20.7604	20.9856	20.9261	21.1017	21.4357	20.6452	20.8703	21.4472	21.0356	21.2135	21.2606	21.1448	21.2083	20.7337	19.8935	20.9538	21.5522	20.9529	21.2286				+	+	+	+				eighthMIC_Ctrl;halfMIC_Ctrl;MIC_Ctrl;quarterMIC_Ctrl	4	4	4	80	80	80	9.7746	0	21.076
27.2516	27.3626	27.3115	27.415	27.4909	27.4588	27.5775	27.4624	27.5982	27.5134	27.6951	27.426	27.7605	27.7701	27.7117	27.7276	27.7354	27.8689	27.6871	27.6924	27.6234	27.9117	27.6228	27.8182	27.5572	27.7148	27.7502	27.6219	27.7826	27.7124				+	+	+	+				eighthMIC_Ctrl;halfMIC_Ctrl;MIC_Ctrl;quarterMIC_Ctrl	19	19	19	82.6	82.6	82.6	28.275	0	279.17
28.1639	28.1813	28.2269	28.2604	28.2779	28.1338	27.9728	27.9655	28.1804	28.0472	28.2035	27.9616	28.1401	28.109	28.222	28.2953	28.1537	28.2445	28.2386	28.1846	28.1868	28.2019	28.2333	28.2454	28.1036	28.0891	28.1425	28.1407	28.1824	28.2114				+							eighthMIC_Ctrl	31	31	31	70.7	70.7	70.7	53.656	0	323.31
24.9963	22.0219	24.9772	22.0159	21.4016	22.176	21.1708	21.6282	21.328	19.7212	19.724	20.7681	20.4217	18.9251	20.2884	18.9266	20.6154	18.8945	21.2282	21.2673	20.4583	20.1734	19.6264	20.0651	21.3243	20.1921	20.9561	21.4969	19.9369	21.1059				+	+	+	+				eighthMIC_Ctrl;halfMIC_Ctrl;MIC_Ctrl;quarterMIC_Ctrl	2	2	2	28.3	28.3	28.3	17.399	0	29.01
23.9423	23.4125	23.7625	22.8995	22.478	23.1616	22.8024	22.7247	22.6056	22.5229	22.5569	22.0829	22.2628	21.9365	22.1213	22.4296	22.2222	22.2736	22.1304	22.3871	21.9466	22.0152	21.6886	22.2036	22.3956	22.1669	22.0453	22.4223	22.0293	22.383				+	+	+	+				eighthMIC_Ctrl;halfMIC_Ctrl;MIC_Ctrl;quarterMIC_Ctrl	3	3	3	18.4	18.4	18.4	34.316	0	17.713
22.9197	22.6483	22.5258	22.3419	22.4919	22.6593	22.0869	21.9019	22.1311	21.667	20.1033	21.9584	21.8716	21.6915	22.1075	22.3179	22.2015	21.8605	21.7752	22.1232	22.0855	22.3181	22.084	21.7412	21.5924	21.838	21.5264	22.0056	22.1219	21.6928				+	+	+	+				eighthMIC_Ctrl;halfMIC_Ctrl;MIC_Ctrl;quarterMIC_Ctrl	5	5	5	45.5	45.5	45.5	14.007	0	30.824
24.5781	24.794	24.5912	24.8309	24.9643	24.6055	24.4354	24.2472	24.4691	24.3562	24.6268	24.6392	24.7616	24.7613	24.7883	24.7131	24.6909	24.89	24.6885	24.7783	24.5836	24.8838	24.8461	24.9149	24.4884	24.7373	24.7474	24.585	24.6288	24.5861				+							eighthMIC_Ctrl	13	13	13	32.3	32.3	32.3	45.849	0	67.623
28.606	28.5667	29.1275	28.5109	28.3455	28.4197	27.7983	28.0072	28.3102	28.526	27.9956	28.2063	27.8532	27.8412	27.8494	27.9309	27.6653	27.7273	27.9852	28.0227	28.1506	27.7027	27.8947	27.8555	28.0181	27.8753	27.9402	28.3907	27.9602	28.4505				+	+	+	+				eighthMIC_Ctrl;halfMIC_Ctrl;MIC_Ctrl;quarterMIC_Ctrl	9	9	9	46.5	46.5	46.5	13.882	0	141.46
21.8066	22.2413	22.1502	21.9676	21.9256	21.8553	20.3434	20.8551	19.8895	21.8342	21.6835	18.6271	22.199	21.9401	22.1704	21.6634	21.9806	21.5889	19.8994	22.4215	22.3439	22.5942	21.7706	22.1397	21.7657	22.2191	21.775	22.0361	21.9778	21.7517				+							eighthMIC_Ctrl	5	5	5	19.2	19.2	19.2	42.484	0	12.711
22.3604	22.7559	22.6246	22.5148	22.8348	22.5034	22.9607	22.4956	23.1333	23.019	23.2139	22.9603	23.1229	23.1159	23.087	23.0148	23.1624	23.1779	23.309	22.8757	22.6865	23.0882	23.269	23.0902	23.0169	23.0079	23.1049	22.7931	23.1108	23.318				+	+	+	+				eighthMIC_Ctrl;halfMIC_Ctrl;MIC_Ctrl;quarterMIC_Ctrl	11	11	11	37.8	37.8	37.8	46.209	0	92.531
25.1536	25.3371	25.2331	25.4145	25.556	25.3067	25.5088	25.4279	25.659	25.479	25.5895	25.4965	25.7822	25.7981	25.7767	25.8057	25.8224	25.7802	25.8385	25.6439	25.7401	25.8476	25.7007	25.796	25.5617	25.7248	25.7618	25.5526	25.6553	25.6958				+	+	+	+				eighthMIC_Ctrl;halfMIC_Ctrl;MIC_Ctrl;quarterMIC_Ctrl	22	22	22	61	61	61	47.597	0	299.05
27.5013	27.6676	27.5435	27.7823	27.8056	27.6485	27.5113	27.3195	27.598	27.474	27.536	27.3455	27.5659	27.643	27.7407	27.9029	27.616	27.682	27.7607	27.622	27.7477	27.7471	27.7833	27.9429	27.5304	27.604	27.6197	27.5893	27.6011	27.5924				+							eighthMIC_Ctrl	15	15	15	67.4	67.4	67.4	34.951	0	265.56
24.4652	24.5572	24.5203	24.5984	24.7078	24.5974	24.2985	24.1174	24.4082	24.4044	24.5834	24.4089	24.3592	24.389	24.3649	24.5269	24.6256	24.4796	24.5596	24.4449	24.2878	24.5841	24.4337	24.5063	24.2356	24.322	24.4551	24.2785	24.5232	24.5022				+	+	+					eighthMIC_Ctrl;halfMIC_Ctrl;quarterMIC_Ctrl	7	7	7	44.1	44.1	44.1	22.946	0	37.028
19.3569	19.7172	19.4371	19.4964	19.9234	20.4751	20.1473	20.2695	20.1358	20.2559	20.1793	20.4312	21.2084	20.3011	20.0336	20.1509	20.1977	20.3341	20.4871	18.9908	19.5264	18.8044	20.404	20.6768	20.0767	21.0624	20.3822	20.4746	20.2849	20.3343				+	+	+					eighthMIC_Ctrl;halfMIC_Ctrl;quarterMIC_Ctrl	3	3	3	21.1	21.1	21.1	20.45	0	3.1612
24.0309	24.0206	23.812	23.8174	23.9593	23.5322	23.7035	23.48	23.4257	23.4994	23.6935	23.7458	23.9715	23.9012	23.8371	23.8643	23.9088	23.7762	23.8728	23.778	23.5823	23.8509	24.0241	23.6898	23.7194	23.9957	23.5897	23.8678	23.7446	23.8425				+							eighthMIC_Ctrl	19	19	19	29.1	29.1	29.1	105.37	0	40.277
29.6999	29.5512	29.6285	29.5752	29.4148	29.6576	29.5556	29.8573	29.8303	29.8742	29.7509	29.7378	29.5764	29.5832	29.3401	29.3588	29.4948	29.4899	29.2965	29.3771	29.3394	29.0037	28.9351	29.036	29.7876	29.558	29.7086	29.7134	29.6339	29.8054				+		+	+				eighthMIC_Ctrl;halfMIC_Ctrl;MIC_Ctrl	23	23	23	73.7	73.7	73.7	24.099	0	112.37
21.6382	20.1601	21.7295	21.8845	20.4906	21.4395	23.1918	21.821	22.2107	21.7483	22.0148	23.3736	21.8004	23.3102	22.1353	22.1119	19.6498	22.2371	20.013	21.9419	21.8672	20.5935	21.8966	21.8474	22.9171	22.4427	20.2168	23.3705	20.9191	21.0613				+							eighthMIC_Ctrl	4	4	4	14.4	14.4	14.4	36.818	0	10.218
21.7938	22.0195	21.7657	22.1595	22.1021	21.8122	22.2624	22.1475	22.1791	22.6256	22.4432	21.9843	22.2833	22.242	22.4444	22.6197	22.5501	22.5185	22.4411	22.5772	22.4868	22.5459	22.4032	22.5467	22.0913	22.2285	22.5411	22.423	22.3556	22.574				+	+	+	+				eighthMIC_Ctrl;halfMIC_Ctrl;MIC_Ctrl;quarterMIC_Ctrl	5	5	5	18.4	18.4	18.4	32.186	0	19.109
22.2767	22.3985	22.2907	22.2085	21.9459	22.2736	21.997	21.3172	21.8279	22.1217	21.9985	21.9039	21.7802	21.9668	22.0986	22.2306	21.9679	22.1711	22.7039	21.7374	22.4643	22.3459	22.6273	22.3183	21.7253	21.6476	22.0588	21.8807	22.2217	22.1934				+	+	+					eighthMIC_Ctrl;halfMIC_Ctrl;quarterMIC_Ctrl	8	8	8	30.1	30.1	30.1	38.194	0	25.206
27.6654	27.5468	29.2678	27.2683	27.3223	27.4583	29.1844	29.5807	28.0221	29.0683	28.1675	29.3636	27.8835	29.0786	27.7914	27.5592	28.6532	27.6241	26.7693	26.8644	27.0639	28.017	27.1208	27.1383	29.3672	28.4608	28.1026	29.4124	27.9475	28.3891				+							eighthMIC_Ctrl	15	15	15	70.8	70.8	70.8	15.287	0	92.088
27.3643	28.1282	27.6591	28.1757	28.5138	27.8505	28.4713	28.2072	28.5654	28.4547	28.5065	28.4282	28.6495	28.5586	28.5385	28.3266	28.4901	28.554	28.6855	28.6079	28.6959	28.489	28.5911	28.74	28.3275	28.4465	28.5981	28.5169	28.5566	28.593				+	+	+	+				eighthMIC_Ctrl;halfMIC_Ctrl;MIC_Ctrl;quarterMIC_Ctrl	8	8	8	38.2	38.2	38.2	23.787	0	164.53
25.7866	25.7099	25.5503	25.6374	25.5619	25.5758	25.5385	25.3449	25.4662	25.3508	25.66	25.2495	25.4247	25.3539	25.447	25.6108	25.5348	25.5858	25.5449	25.4646	25.5747	25.9128	25.5176	25.4838	25.2997	25.3862	25.6497	25.4281	25.5997	25.5683				+		+					eighthMIC_Ctrl;halfMIC_Ctrl	4	4	4	46	46	46	14.092	0	134.24
19.2447	23.9715	20.6791	24.1158	24.1884	19.6904	24.6844	24.0685	24.781	24.8004	24.8374	25.0328	24.0006	23.8205	18.0748	23.8082	23.9156	23.8776	23.9375	23.8877	24.1422	23.929	23.7224	23.9332	24.1142	24.4112	24.6729	24.0855	24.5941	24.2084				+	+		+				eighthMIC_Ctrl;MIC_Ctrl;quarterMIC_Ctrl	3	3	3	12.2	12.2	12.2	36.283	0	10.359
27.1863	27.4151	27.1013	27.4054	27.462	27.2216	27.4506	27.3542	27.5427	27.4908	27.6169	27.5141	27.7258	27.7728	27.6177	27.7892	27.7528	27.8649	27.7832	27.6371	27.6777	27.7104	27.7679	27.8262	27.3761	27.6816	27.6498	27.5177	27.739	27.6262				+	+	+	+				eighthMIC_Ctrl;halfMIC_Ctrl;MIC_Ctrl;quarterMIC_Ctrl	27	27	27	54.7	54.7	54.7	65.849	0	323.31
28.5539	28.6573	28.5705	28.6924	28.7655	28.6131	28.7611	28.6634	28.8139	28.8336	28.8377	28.69	28.7891	28.8538	28.8762	28.9646	28.8451	28.9443	28.8155	28.7951	28.8152	28.7877	28.832	28.9056	28.7523	28.8075	28.8337	28.8642	28.8185	28.8838				+	+	+	+				eighthMIC_Ctrl;halfMIC_Ctrl;MIC_Ctrl;quarterMIC_Ctrl	42	42	42	81	81	81	68.359	0	323.31
26.6075	26.8454	26.6659	26.8226	26.8595	26.6687	26.9569	26.7698	26.9339	26.9502	27.0837	26.8299	27.0877	27.0686	27.1572	27.1532	27.1184	27.2428	27.0489	27.0482	26.9889	27.1555	27.2695	27.0151	26.7497	27.0778	27.0575	27.0254	27.0992	27.0337				+	+	+	+				eighthMIC_Ctrl;halfMIC_Ctrl;MIC_Ctrl;quarterMIC_Ctrl	19	19	19	49.4	49.4	49.4	59.856	0	323.31
29.207	29.394	29.294	29.4564	29.3823	29.2557	29.1347	29.1224	29.2531	29.2163	29.2819	29.2084	29.2869	29.2502	29.3367	29.2641	29.2715	29.2516	29.3372	29.2994	29.2794	29.2728	29.263	29.2564	29.2126	29.1553	29.3117	29.3399	29.2625	29.3395				+							eighthMIC_Ctrl	37	37	37	76.6	76.6	76.6	63.102	0	323.31
22.3239	22.4868	22.502	22.3813	22.7392	22.6586	22.6438	21.6349	22.2792	21.9769	22.1013	21.7968	22.3864	22.0917	22.3358	22.4513	22.2734	22.3458	22.1603	20.4975	22.3727	22.8942	23.0074	22.919	22.1587	22.0133	22.301	22.2196	22.2785	22.0608				+	+	+					eighthMIC_Ctrl;halfMIC_Ctrl;quarterMIC_Ctrl	3	3	3	27.7	27.7	27.7	21.403	0	44.361
26.3666	25.5052	26.7158	25.6706	25.6484	25.7362	25.1495	25.5281	25.3277	25.4057	25.1352	25.5985	25.1545	25.011	25.0086	24.6276	24.8398	24.5019	24.7875	25.6454	25.2639	25.0321	24.9743	24.7876	25.5647	25.2143	24.9569	25.4512	25.0984	25.1155				+	+	+	+				eighthMIC_Ctrl;halfMIC_Ctrl;MIC_Ctrl;quarterMIC_Ctrl	6	6	6	55.2	55.2	55.2	6.9721	0	19.141
22.6969	22.8562	23.126	22.4361	19.9899	22.6754	20.7244	21.0379	21.7395	20.5663	21.0075	20.269	19.8913	20.3547	20.5879	21.2071	20.4532	20.5315	20.3147	20.1917	20.3774	21.4897	20.5341	20.9596	20.6099	20.0919	20.4088	21.5129	20.2991	20.4631				+	+	+	+				eighthMIC_Ctrl;halfMIC_Ctrl;MIC_Ctrl;quarterMIC_Ctrl	2	2	2	34.2	34.2	34.2	8.8697	0	34.042
25.6591	26.18	25.7745	25.9901	26.1832	25.9529	26.2314	26.0486	26.2304	26.3678	26.3505	26.1459	26.4232	26.3223	26.5356	26.5013	26.4257	26.5117	26.3284	26.1562	26.2217	26.4823	26.4637	26.4969	26.1113	26.3542	26.4243	26.2247	26.3624	26.3423				+	+	+	+				eighthMIC_Ctrl;halfMIC_Ctrl;MIC_Ctrl;quarterMIC_Ctrl	20	20	20	45.8	45.8	45.8	60.515	0	234.67
25.1384	25.4411	25.1438	25.4647	25.5756	25.3155	25.7362	25.3398	25.6066	25.6315	25.7595	25.5723	25.807	25.6653	25.7462	25.7431	25.6878	25.852	25.8208	25.6706	25.7533	25.7856	25.8278	25.861	25.4204	25.7735	25.8133	25.5112	25.7524	25.667				+	+	+	+				eighthMIC_Ctrl;halfMIC_Ctrl;MIC_Ctrl;quarterMIC_Ctrl	13	13	13	66.5	66.5	66.5	20.663	0	189.69
23.1829	23.208	23.0532	23.2541	23.3715	23.5745	22.8891	23.101	23.045	23.1454	23.1137	22.7241	23.1928	23.297	23.4004	23.3277	23.0842	23.3317	23.3095	23.7515	23.328	23.4215	23.2248	23.3516	23.0387	23.2814	23.3819	22.9948	23.1573	23.3086				+							eighthMIC_Ctrl	6	6	6	42.8	42.8	42.8	25.347	0	106.94
23.6954	23.8109	23.7258	24.0512	24.1104	24.1108	23.4378	23.7009	23.7883	23.6806	23.7771	23.4662	23.7874	23.7048	23.8131	23.5	23.7633	23.6145	23.8368	23.7265	24.0026	24.2374	23.7867	23.8334	23.5865	23.9424	23.8002	23.7529	23.8096	23.6962				+		+					eighthMIC_Ctrl;halfMIC_Ctrl	9	9	9	36.3	36.3	36.3	29.443	0	46.536
21.1572	21.5553	21.1977	21.4424	21.6114	21.1833	21.5067	21.5143	21.6401	21.6805	21.6842	21.5759	21.7395	21.5962	21.5752	21.6932	21.6403	21.6392	21.6979	21.6865	21.5508	21.6246	21.6107	21.6009	21.1631	21.6654	21.7399	21.499	21.7514	21.4703				+		+	+				eighthMIC_Ctrl;halfMIC_Ctrl;MIC_Ctrl	2	2	2	4.9	4.9	4.9	54.337	0	46.169
26.8223	27.2526	26.8767	27.337	27.3743	27.1745	27.46	27.2584	27.47	27.4226	27.4969	27.3907	27.6529	27.692	27.6923	27.7831	27.672	27.7021	27.5703	27.5247	27.5382	27.7706	27.6753	27.6143	27.2882	27.664	27.601	27.4904	27.6019	27.5583				+	+	+	+				eighthMIC_Ctrl;halfMIC_Ctrl;MIC_Ctrl;quarterMIC_Ctrl	42	42	42	61	61	61	104.88	0	323.31
21.7092	22.1692	22.0943	21.897	21.8476	22.1847	21.8792	21.4749	21.4334	21.8315	21.3753	21.8705	21.8066	22.0351	21.6367	22.0236	22.1105	22.165	21.9984	22.1323	22.227	21.892	22.1251	22.135	21.8329	22.0089	22.0264	21.9095	21.896	21.8326				+							eighthMIC_Ctrl	4	4	4	35.7	35.7	35.7	23.141	0	18.265
22.5985	23.0684	22.766	23.1213	23.2771	22.8253	23.0283	23.3566	23.3312	23.2518	23.2567	23.2757	23.525	23.3923	23.4329	23.4707	23.3859	23.5231	23.5707	23.1844	23.3754	23.7171	23.6619	23.4322	23.204	23.5157	23.7036	23.2744	23.5451	23.5365				+	+	+	+				eighthMIC_Ctrl;halfMIC_Ctrl;MIC_Ctrl;quarterMIC_Ctrl	10	10	10	45.1	45.1	45.1	32.851	0	63.816
24.8522	24.831	24.6226	24.5644	24.6926	24.5266	24.547	24.3209	24.65	24.4081	24.5622	24.3582	24.6312	24.4479	24.7067	24.8287	24.4225	24.549	24.6238	24.5983	24.9739	24.8212	24.6461	24.7965	24.5175	24.6994	24.5503	24.6659	24.5353	24.5169				+							eighthMIC_Ctrl	14	14	14	59	59	59	36.061	0	92.799
25.839	26.1244	25.9936	26.2174	26.2052	26.0014	26.263	26.0266	26.3587	26.3733	26.3694	26.2819	26.3426	26.4351	26.4194	26.4596	26.3222	26.527	26.4009	26.2909	26.4301	26.0791	26.5098	26.3391	26.1548	26.3306	26.4524	26.2372	26.3612	26.3549				+	+	+	+				eighthMIC_Ctrl;halfMIC_Ctrl;MIC_Ctrl;quarterMIC_Ctrl	18	18	18	64.1	64.1	64.1	36.06	0	286.16
20.0298	20.7791	21.295	20.0446	19.1881	19.4597	22.0695	21.9106	20.3301	21.0622	20.6897	22.8505	20.5568	21.6855	19.9886	19.4681	20.9566	19.8701	18.4639	18.3112	18.7339	20.4363	18.8569	20.1353	22.8293	21.5636	20.1297	22.2663	21.3735	21.3109				+	+		+				eighthMIC_Ctrl;MIC_Ctrl;quarterMIC_Ctrl	5	5	5	30.6	30.6	30.6	6.9771	0	5.2808
22.8164	22.9478	22.4643	23.0181	22.6148	22.6833	22.9686	22.975	23.1191	22.9585	23.1378	22.8967	23.2148	22.9518	23.2369	23.237	23.3017	23.1647	22.9671	22.9896	22.8493	23.3298	23.2771	23.0293	22.7794	23.1353	23.0837	22.9741	23.1625	22.9706				+	+	+	+				eighthMIC_Ctrl;halfMIC_Ctrl;MIC_Ctrl;quarterMIC_Ctrl	7	7	7	31.4	31.4	31.4	29.762	0	93.925
22.5178	22.7062	22.6868	22.6911	22.5996	22.8488	22.723	22.4996	22.4743	22.3806	22.4413	22.4744	22.919	22.8814	23.0814	22.929	23.0922	23.0048	23.0252	22.9416	22.8669	23.143	23.2999	23.2071	22.3597	22.9271	22.6075	22.6761	22.6551	22.2935				+		+	+				eighthMIC_Ctrl;halfMIC_Ctrl;MIC_Ctrl	5	5	5	47.3	47.3	47.3	19.846	0	196.98
30.3738	29.4794	30.0026	29.2029	28.7537	29.5375	28.89	28.9797	29.0384	28.7401	29.1189	28.7282	26.8616	27.2816	27.4205	27.5483	27.1823	27.3889	27.3936	27.5518	27.5435	27.4947	27.3092	27.5825	28.1399	27.7356	27.6933	28.3971	27.7184	27.8922				+	+	+	+	+			eighthMIC_Ctrl;halfMIC_Ctrl;MIC_Ctrl;quarterMIC_Ctrl;quarterMIC_eighthMIC	6	6	6	78.8	78.8	78.8	7.374	0	130.97
22.0683	22.1946	21.9945	22.1732	22.1915	21.4059	22.41	22.1915	22.4119	22.2274	22.5511	22.381	22.548	22.1799	22.5451	22.7045	22.2819	22.182	22.5782	22.2448	22.2504	22.1528	22.9075	22.4839	22.3057	22.5615	22.8613	22.6206	22.4188	22.4467				+	+	+	+				eighthMIC_Ctrl;halfMIC_Ctrl;MIC_Ctrl;quarterMIC_Ctrl	5	5	5	27.5	27.5	27.5	36.26	0	12.733
21.4297	20.845	23.7284	20.7621	20.8165	20.7565	19.7375	20.2659	20.126	20.1214	20.0242	20.3495	19.9049	18.6875	20.6497	20.2007	20.4456	20.7964	21.0359	20.4169	19.6902	20.7765	20.2431	19.898	20.008	19.6255	20.0786	19.4843	19.5227	20.7632				+	+	+	+				eighthMIC_Ctrl;halfMIC_Ctrl;MIC_Ctrl;quarterMIC_Ctrl	2	2	2	29.9	29.9	29.9	7.6627	0	5.2486
24.1203	24.453	24.2883	24.5883	24.5682	24.3479	24.6462	24.4725	24.6332	24.723	24.6639	24.5283	24.758	24.6766	24.7536	24.8622	24.8265	24.8212	24.7961	24.5196	24.7157	24.8807	24.7754	24.7619	24.5272	24.7838	24.7515	24.6792	24.7465	24.7169				+	+	+	+				eighthMIC_Ctrl;halfMIC_Ctrl;MIC_Ctrl;quarterMIC_Ctrl	7	7	7	40.6	40.6	40.6	36.229	0	60.669
27.8338	28.1851	27.8367	28.1081	28.2298	28.0787	28.1937	28.1079	28.3565	28.3043	28.3256	28.2415	28.3284	28.4686	28.2904	28.3654	28.3372	28.3516	28.4531	28.3914	28.4328	28.4843	28.4538	28.4697	28.1898	28.4886	28.3828	28.3569	28.4352	28.3641				+	+	+	+				eighthMIC_Ctrl;halfMIC_Ctrl;MIC_Ctrl;quarterMIC_Ctrl	17	17	17	49.8	49.8	49.8	44.104	0	247.9
25.0957	25.5195	25.3279	25.3959	25.5427	25.4258	25.5765	25.4791	25.6081	25.6163	25.7226	25.4972	25.6817	25.5574	25.6699	25.7529	25.6374	25.7645	25.64	25.6231	25.5835	25.3597	25.631	25.4923	25.4939	25.6656	25.6809	25.6538	25.7386	25.7319				+	+	+	+				eighthMIC_Ctrl;halfMIC_Ctrl;MIC_Ctrl;quarterMIC_Ctrl	19	19	19	47.3	47.3	47.3	49.97	0	118.06
21.553	22.0406	21.7085	22.1759	20.6551	21.8687	22.1256	22.1969	22.4608	22.0817	22.5653	22.2837	22.2995	22.4869	22.7409	22.5693	22.9077	22.8557	22.6737	22.5942	22.2428	21.3985	22.6904	22.9823	22.1504	22.6141	22.4711	22.5328	22.146	22.3795				+	+	+	+				eighthMIC_Ctrl;halfMIC_Ctrl;MIC_Ctrl;quarterMIC_Ctrl	5	5	5	39.9	39.9	39.9	27.215	0	22.15
20.7221	19.2994	22.9168	20.2782	19.0689	20.3643	22.5661	22.966	21.6665	23.259	20.3826	22.9851	18.9182	21.4574	20.3803	20.4128	20.9395	22.1058	19.9055	19.6658	19.5078	20.0222	20.9944	19.6685	22.5021	21.7228	20.6238	19.394	21.5779	21.464				+							eighthMIC_Ctrl	2	2	2	43.8	43.8	43.8	7.0186	0.00091827	2.6549
23.7323	23.9769	23.7171	24.014	24.2087	23.8797	23.6048	23.4738	23.8374	23.7587	23.728	23.6935	23.9784	23.9254	23.9913	23.8668	23.9871	23.5578	23.8219	23.8266	23.8845	24.3068	24.0576	24.061	23.7547	24.0006	23.9057	23.6866	24.0735	23.8097												7	7	7	39.5	39.5	39.5	24.527	0	103.94
21.6746	21.8299	21.472	22.0384	22.3378	21.7959	21.1896	21.2508	21.753	21.4265	21.5677	21.6105	21.8273	19.863	21.8699	22.1513	21.7132	22.0033	21.6694	21.9216	21.8544	22.3426	22.2207	22.2514	21.3157	21.8649	21.9856	21.2933	21.8776	21.6067												5	5	5	50.8	50.8	50.8	14.894	0	18.481
23.8661	23.8685	23.9298	23.9766	24.1101	24.1705	23.8559	23.7427	23.9554	23.8088	23.8412	23.7979	24.1897	24.0504	24.1314	24.0398	24.0646	23.9818	24.2659	24.3212	24.1031	24.2969	24.2682	24.2864	24.0346	23.9406	23.9206	24.0427	24.0275	23.9953							+				MIC_Ctrl	9	9	9	27	27	27	46.673	0	91.082
28.5474	28.715	28.612	28.6854	28.7232	28.6599	28.7576	28.6771	28.8727	28.823	28.8198	28.6684	28.7709	28.8674	28.8741	29.0593	28.9072	28.9451	28.8843	29.0604	29.0727	28.8625	29.0052	29.0465	28.9133	28.8057	28.8126	28.9561	28.8322	28.958					+	+	+				halfMIC_Ctrl;MIC_Ctrl;quarterMIC_Ctrl	31	31	31	66.5	66.5	66.5	48.608	0	323.31
26.915	27.1491	26.9303	27.1922	27.1208	27.3212	26.9277	26.8046	26.9789	26.9269	27.0423	26.7163	26.9036	26.9382	27.0935	27.1547	27.0638	27.0484	27.0584	27.0707	27.0576	27.1385	27.1053	27.1674	26.9812	26.9023	26.9789	27.0408	26.8862	26.9672												18	18	18	79.7	79.7	79.7	32.975	0	264.49
19.6306	20.989	21.4624	21.1279	22.208	21.1226	20.6089	20.5448	19.3772	19.5977	19.2556	20.5436	20.4099	20.3459	20.7827	18.2836	20.0943	20.2391	20.7282	19.6835	20.2985	19.9578	20.6488	19.5376	20.1216	20.5792	19.5973	19.8875	20.8867	21.13						+	+				halfMIC_Ctrl;MIC_Ctrl	3	3	3	8.7	8.7	8.7	51.111	0.0017873	2.2392
22.7695	22.6833	22.6436	22.8982	22.946	22.7474	23.1916	22.7247	23.0522	23.0849	22.931	22.9506	23.1281	23.1226	23.0407	23.1751	23.026	23.1411	23.1432	22.9693	22.9887	23.544	23.2271	23.4449	22.8768	23.0697	22.9663	23.1584	23.2207	23.2139					+	+	+				halfMIC_Ctrl;MIC_Ctrl;quarterMIC_Ctrl	6	6	6	46	46	46	17.097	0	62.783
24.4416	24.1619	25.0124	23.7115	23.3213	23.5467	22.9497	23.8494	23.4743	23.0195	23.1919	23.2694	22.1392	22.6331	22.9413	22.4719	22.6903	20.355	22.5937	23.3295	22.7123	22.6137	22.7299	23.4603	23.2407	22.7521	22.7372	23.102	22.8299	22.593					+	+	+				halfMIC_Ctrl;MIC_Ctrl;quarterMIC_Ctrl	4	4	4	50.7	50.7	50.7	8.1612	0	35.09
20.0388	21.2691	18.8722	21.7238	21.8748	21.3024	22.1237	22.5177	21.6752	21.7636	22.1246	22.434	21.8811	22.318	21.9203	21.7535	22.0266	21.6875	21.2938	21.6421	21.6349	21.7973	21.2958	21.2315	22.0132	20.2886	22.0209	22.3233	21.997	21.7376						+					halfMIC_Ctrl	5	5	5	26.8	26.8	26.8	24.282	0	8.5587
20.7844	21.2312	20.814	21.0288	21.4444	20.5147	20.1374	19.9186	20.1257	20.8987	20.9546	20.3761	19.5906	20.4978	20.3117	20.4759	20.31	20.4043	21.4364	20.0979	20.2886	20.2486	20.7703	20.395	21.3282	20.3788	20.699	18.6736	19.9681	20.8566						+					halfMIC_Ctrl	2	2	2	23.9	23.9	23.9	16.305	0	3.877
28.2575	28.4145	28.272	28.4918	28.5867	28.3811	28.5771	28.4251	28.5853	28.5546	28.672	28.5256	28.7284	28.696	28.7195	28.8222	28.661	28.804	28.8346	28.7507	28.7157	28.6844	28.8306	28.8965	28.5189	28.6817	28.6603	28.6131	28.6802	28.6468					+	+	+				halfMIC_Ctrl;MIC_Ctrl;quarterMIC_Ctrl	21	21	21	44.2	44.2	44.2	54.583	0	250.47
24.4326	23.3847	23.8334	21.633	19.7489	21.8867	20.6029	21.1164	21.1763	20.3612	19.4174	20.7721	20.2034	19.6476	21.0754	21.0458	18.9926	20.9144	19.8041	21.0918	18.7257	20.5716	21.3007	20.8364	20.7801	21.7806	19.9718	19.8256	20.6325	19.6838					+	+	+				halfMIC_Ctrl;MIC_Ctrl;quarterMIC_Ctrl	2	2	2	84.6	84.6	84.6	2.9785	0	13.32
22.9424	23.2991	22.7001	23.2413	23.5664	23.0251	23.3739	23.4174	23.5187	23.2947	23.8567	23.5551	23.6622	23.6026	23.489	23.7123	23.5457	23.872	23.6429	23.2703	23.2708	23.4811	23.6154	23.6689	23.3292	23.7403	23.9619	23.4624	23.8082	23.42					+	+	+				halfMIC_Ctrl;MIC_Ctrl;quarterMIC_Ctrl	11	11	11	76.8	76.8	76.8	24.534	0	99.33
23.2194	23.127	23.2284	23.3026	23.4376	23.331	23.3541	23.4098	23.6545	23.3815	23.7607	23.3577	23.6677	23.4837	23.7491	23.8227	23.6082	23.6787	23.7868	23.8075	23.7543	23.9396	23.9247	23.7368	23.4555	23.4013	23.589	23.7008	23.7084	23.713					+	+	+				halfMIC_Ctrl;MIC_Ctrl;quarterMIC_Ctrl	11	11	11	30.6	30.6	30.6	59.377	0	33.292
23.3746	23.7578	23.4121	23.7465	23.6531	23.552	23.7111	23.6459	23.9561	23.8401	23.8624	23.7166	23.8792	23.842	23.833	23.9872	23.7749	23.8942	24.0857	23.898	23.9614	23.9181	23.9762	23.9315	23.6599	23.6403	23.9364	23.7326	23.8128	23.9236					+	+	+				halfMIC_Ctrl;MIC_Ctrl;quarterMIC_Ctrl	6	6	6	28.8	28.8	28.8	30.583	0	25.35
23.7103	24.1765	23.794	24.2374	24.3149	23.701	24.4139	24.1072	24.4049	24.306	24.4472	24.186	24.5434	24.5139	24.6169	24.7148	24.7247	24.6486	24.569	24.4475	24.4265	24.9617	24.692	24.6628	24.2511	24.6337	24.4886	24.4477	24.659	24.3688					+	+	+				halfMIC_Ctrl;MIC_Ctrl;quarterMIC_Ctrl	10	10	10	39.8	39.8	39.8	36.582	0	77.87
24.7884	25.2065	24.8964	25.2504	25.3852	25.0231	25.246	25.1917	25.401	25.3541	25.4303	25.4767	25.5054	25.395	25.4421	25.5449	25.4271	25.5185	25.4659	25.478	25.2891	25.415	25.538	25.4331	25.2094	25.3511	25.4762	25.2854	25.427	25.4669					+	+	+				halfMIC_Ctrl;MIC_Ctrl;quarterMIC_Ctrl	11	11	11	33.2	33.2	33.2	42.17	0	89.91
21.8366	22.0446	22.223	22.2042	22.1706	21.8139	22.1401	22.0483	22.5308	22.6774	22.2813	22.4841	22.4768	22.5863	22.227	22.3394	22.229	22.276	22.1511	22.2864	22.5795	22.6433	22.6505	22.4846	22.2252	22.6103	22.5829	22.2191	22.526	22.5929					+	+	+				halfMIC_Ctrl;MIC_Ctrl;quarterMIC_Ctrl	8	8	8	30	30	30	33.257	0	17.189
24.4795	24.7997	24.5409	24.8832	25.0813	24.7623	24.9999	24.9022	24.9166	25.0611	25.2049	24.9706	25.2535	25.1403	25.27	25.0725	25.1962	25.2351	25.2736	24.9204	25.1734	25.2484	25.2292	25.462	24.953	25.2309	25.164	25.0079	25.1877	25.0126					+	+	+				halfMIC_Ctrl;MIC_Ctrl;quarterMIC_Ctrl	18	18	18	48.8	48.8	48.8	47.117	0	139.22
21.7966	21.7904	21.6291	22.0301	22.244	22.0717	22.8672	21.577	22.7505	22.713	22.4432	22.371	22.2697	22.6264	22.7221	22.84	22.6543	22.5816	22.6642	22.7982	22.4383	22.8405	23.0027	23.1105	22.3533	22.7738	22.365	21.6456	22.5724	22.593					+	+	+				halfMIC_Ctrl;MIC_Ctrl;quarterMIC_Ctrl	5	5	5	42.5	42.5	42.5	32.572	0	45.274
22.8032	22.8831	23.2501	22.9106	22.9484	22.7009	22.5467	22.2717	22.7261	22.5556	22.6904	22.9449	22.646	22.8548	22.5465	22.6283	22.678	22.646	22.8152	22.7318	22.4344	22.8982	23.0514	22.8365	22.6228	22.8767	22.5881	22.1578	22.9843	22.6987						+					halfMIC_Ctrl	10	10	10	36	36	36	35.681	0	30.408
22.5771	22.478	22.382	22.7258	22.4332	22.1239	22.652	22.8483	22.6223	22.8112	22.4675	23.0495	22.9715	23.0018	22.6256	22.4591	22.481	22.8727	22.4778	22.9467	22.9954	22.8048	23.0504	22.629	22.8943	22.9896	23.0226	22.5656	23.0385	22.5726					+	+	+				halfMIC_Ctrl;MIC_Ctrl;quarterMIC_Ctrl	4	4	4	40.4	40.4	40.4	19.645	0	20.754
25.1589	25.4714	25.2266	25.4842	25.5765	25.2131	25.5658	25.3836	25.6341	25.561	25.6358	25.5431	25.9125	25.7891	25.7247	25.876	25.8172	25.8095	25.8661	25.7959	25.7636	25.906	26.0033	25.9006	25.4755	25.7515	25.7039	25.6408	25.8027	25.7629					+	+	+				halfMIC_Ctrl;MIC_Ctrl;quarterMIC_Ctrl	14	14	14	39.2	39.2	39.2	55.625	0	165.65
25.5702	25.9042	25.598	25.9864	26.1331	25.6493	26.0897	25.8972	26.1086	26.0817	26.1471	26.0184	26.2596	26.2517	26.3704	26.3715	26.249	26.3918	26.2984	26.1954	26.2694	26.3906	26.4202	26.3927	26.0409	26.3895	26.2229	26.0573	26.3042	26.1965					+	+	+				halfMIC_Ctrl;MIC_Ctrl;quarterMIC_Ctrl	24	24	24	48.1	48.1	48.1	66.628	0	323.31
29.4493	29.1639	29.8843	29.4622	28.994	29.0605	28.9062	28.9718	29.1796	29.0008	29.0417	28.5286	28.7504	28.8646	28.7039	28.9456	28.8835	28.8708	28.9891	29.0111	29.0014	28.9559	28.8388	28.9431	28.9842	28.7226	29.0308	29.1456	28.9119	29.0063					+	+	+				halfMIC_Ctrl;MIC_Ctrl;quarterMIC_Ctrl	9	9	9	65.2	65.2	65.2	14.83	0	45.839
21.977	22.562	22.2671	22.319	22.2348	22.1436	22.001	21.5375	22.1715	21.9587	22.0736	22.0177	22.4957	22.3687	22.5654	22.4987	22.2207	22.5636	22.42	22.7195	22.6967	22.6568	22.5601	22.7539	22.1595	22.1442	22.4504	22.2335	22.3963	22.3939						+	+				halfMIC_Ctrl;MIC_Ctrl	4	4	4	22	22	22	25.855	0	28.827
26.3239	26.4023	26.3924	26.3034	26.2313	26.1373	26.2555	26.08	26.1985	26.1553	26.2182	26.1855	26.0972	26.0717	26.1926	26.2978	26.0855	26.1409	26.1176	26.119	26.1835	26.2102	26.1087	26.3873	25.998	26.1503	26.1048	26.1117	26.0853	26.109					+	+					halfMIC_Ctrl;quarterMIC_Ctrl	19	19	19	57.1	57.1	57.1	28.904	0	197.2
23.7453	23.9992	23.7383	23.7874	23.8696	23.7311	23.5933	23.3928	23.6939	23.6661	23.8089	23.6791	23.8415	23.8617	24.0299	23.9929	23.9942	23.9206	24.0741	23.885	23.8658	23.9933	24.0136	23.9725	23.5295	23.7766	23.8174	23.728	23.7843	23.8646						+	+				halfMIC_Ctrl;MIC_Ctrl	9	9	9	47.6	47.6	47.6	29.821	0	102.9
21.2897	20.7488	20.3464	19.8165	19.8859	19.8296	19.8265	19.4336	19.7198	19.7298	19.6794	19.8579	19.8512	19.5806	19.5765	19.5397	19.6454	19.6751	19.7539	19.3912	19.7253	19.6478	19.9952	21.7693	19.7204	19.9486	19.7865	19.6237	20.3541	19.7318						+					halfMIC_Ctrl	2	2	2	16.4	16.4	16.4	23.868	0	4.173
26.341	26.4962	26.2772	26.4884	26.5889	26.5723	26.6954	26.6273	26.8029	26.5841	26.7573	26.412	26.4854	26.4412	26.7383	26.8585	26.601	26.6328	26.6547	26.6009	26.6283	27.1376	26.7754	26.8847	26.5792	26.5932	26.6362	26.6417	26.5267	26.5565					+	+	+				halfMIC_Ctrl;MIC_Ctrl;quarterMIC_Ctrl	10	10	10	55.7	55.7	55.7	20.881	0	309.53
23.9211	23.8876	23.7853	23.9229	23.7734	23.5602	24.2247	23.8457	24.1213	23.8291	24.2338	23.9538	24.335	24.3076	24.3017	24.4592	24.2265	24.5709	24.3956	24.4199	24.3629	24.6694	24.6323	24.5509	24.0152	24.2353	24.1281	24.1497	24.3452	24.329					+	+	+				halfMIC_Ctrl;MIC_Ctrl;quarterMIC_Ctrl	10	10	10	65.2	65.2	65.2	24.037	0	44.499
23.0905	19.9877	23.32	19.9714	19.8341	19.8669	18.7975	18.9467	20.042	19.357	19.098	19.4525	20.0112	19.0797	19.2018	18.8056	18.6536	20.0862	21.3807	18.7052	19.5521	21.5739	20.2226	19.188	19.0143	18.8897	18.814	18.8923	18.6777	18.9609					+	+					halfMIC_Ctrl;quarterMIC_Ctrl	2	2	2	11.5	11.5	11.5	18.764	0	2.8591
24.2324	23.721	24.4363	23.8483	23.6506	23.4694	23.4301	23.5311	23.5226	23.5797	23.3471	23.6797	23.3393	23.2295	23.3909	23.462	23.3316	23.1988	23.384	23.7508	23.8218	23.6655	23.3331	23.1768	23.3811	23.4082	23.3126	23.5086	23.2811	23.2825					+	+	+				halfMIC_Ctrl;MIC_Ctrl;quarterMIC_Ctrl	15	15	15	16	16	16	114.7	0	158.94
26.4271	26.6962	26.4342	26.7002	26.7284	26.5363	26.7563	26.5823	26.7823	26.7681	26.8573	26.7477	26.948	26.9378	27.005	27.0724	26.9655	27.0331	26.957	26.7924	26.8887	27.2444	27.0632	27.0784	26.5539	27.0331	26.9059	26.7636	26.9278	26.9199					+	+	+				halfMIC_Ctrl;MIC_Ctrl;quarterMIC_Ctrl	19	19	19	50.4	50.4	50.4	52.934	0	323.31
24.11	24.4475	24.0668	24.4604	24.396	24.2678	24.4482	24.4012	24.5023	24.5302	24.5159	24.4101	24.4908	24.5427	24.7147	24.6731	24.5885	24.6242	24.6676	24.4127	24.5304	24.7562	24.855	24.6649	24.3988	24.5858	24.7098	24.583	24.5934	24.5374					+	+	+				halfMIC_Ctrl;MIC_Ctrl;quarterMIC_Ctrl	12	12	12	43.1	43.1	43.1	37.776	0	116.44
24.2395	24.7535	24.3658	24.6664	24.7986	24.5207	24.8131	24.6762	24.8998	24.7573	24.8676	24.7267	25.1041	25.1464	25.1741	25.1798	25.0488	25.0736	25.1403	25.0432	25.1231	25.4186	25.2178	25.1392	24.8543	25.1567	25.0267	25.0487	25.109	24.9169					+	+	+				halfMIC_Ctrl;MIC_Ctrl;quarterMIC_Ctrl	14	14	14	41.2	41.2	41.2	59.601	0	197.11
21.1996	21.2868	20.5786	21.2625	21.7405	19.7836	21.7468	21.6032	21.6812	21.687	21.7376	21.4857	22.0781	21.7958	21.6302	21.8837	21.5573	21.9346	21.5619	22.0966	22.9929	22.3634	22.1031	21.7527	21.5739	21.9761	21.7565	21.3441	21.613	22.0092					+	+	+				halfMIC_Ctrl;MIC_Ctrl;quarterMIC_Ctrl	5	5	5	19.6	19.6	19.6	45.109	0	20.03
22.2466	22.4822	22.1627	22.5793	22.6098	22.4213	22.4953	22.5833	22.6209	22.714	22.8934	22.5416	22.8325	22.8715	22.7268	22.8412	22.6386	22.7089	22.8388	22.651	22.5879	22.8063	22.6857	22.8142	22.5966	22.5731	22.6883	22.709	22.8541	22.6753					+	+	+				halfMIC_Ctrl;MIC_Ctrl;quarterMIC_Ctrl	10	10	10	20.2	20.2	20.2	58.931	0	13.609
24.9128	25.29	24.8805	25.2849	25.3266	24.953	25.4182	25.1161	25.4017	25.3526	25.4714	25.323	25.4609	25.2183	25.2741	25.3766	25.4949	25.4076	25.4509	25.3488	25.5796	25.4741	25.5182	25.4574	25.0678	25.4815	25.4322	25.0916	25.4668	25.2402						+	+				halfMIC_Ctrl;MIC_Ctrl	17	17	17	50.7	50.7	50.7	49.123	0	151.17
26.4554	26.7286	26.5397	26.7894	26.9146	26.7595	26.9009	26.7243	26.9737	26.944	26.9703	26.8154	27.0668	27.112	27.136	27.1729	27.0909	27.1555	27.1791	27.0175	27.0322	27.2036	27.1929	27.2398	26.9343	26.9507	27.0035	27.0179	26.9973	27.0304					+	+	+		+		halfMIC_Ctrl;halfMIC_quarterMIC;MIC_Ctrl;quarterMIC_Ctrl	21	21	21	48.6	48.6	48.6	60.256	0	323.31
23.7117	23.878	23.9635	23.8702	24.0064	23.6793	23.6042	23.5033	23.8443	23.7577	23.7588	23.4363	23.7281	23.5259	23.8888	24.0058	23.7632	23.7909	24.0085	23.8391	23.8826	23.9516	23.9542	24.1328	23.5407	23.6268	23.7599	23.6623	23.7281	23.9855												6	6	6	32.2	32.2	32.2	20.977	0	26.419
25.2523	24.6738	24.8169	24.5971	24.1971	24.7018	24.3626	24.4944	24.3441	24.3954	24.4256	23.9224	24.6285	24.8215	24.9513	24.9762	24.9107	24.822	25.4593	25.377	25.5737	25.7272	25.2322	25.5885	24.8301	24.5296	24.4975	24.8555	24.5034	24.4752							+			+	MIC_Ctrl;MIC_halfMIC	19	19	17	39.7	39.7	38.4	76.387	0	90.151
20.7816	20.9984	20.94	21.151	21.2405	20.9945	20.4383	20.572	21.0949	20.8393	20.7634	20.7915	21.0223	20.5292	20.3472	20.5407	20.6222	20.8434	20.9938	20.5354	20.5309	21.01	20.9531	20.5548	20.6142	20.6123	20.7015	20.6951	20.9194	20.9322					+	+	+				halfMIC_Ctrl;MIC_Ctrl;quarterMIC_Ctrl	3	3	3	18.9	18.9	18.9	15.763	0	3.7345
24.4712	24.9642	24.6687	25.0961	25.0388	24.6488	25.1112	24.9812	25.0475	25.1083	25.2525	24.9631	25.3087	25.2839	25.3774	25.5551	25.4911	25.3497	25.4226	25.3812	25.3553	25.411	25.5321	25.5432	25.0712	25.4436	25.3071	25.0225	25.258	25.2243					+	+	+				halfMIC_Ctrl;MIC_Ctrl;quarterMIC_Ctrl	5	5	5	35.5	35.5	35.5	19.588	0	157.64
21.9676	22.6904	23.1782	22.723	23.366	22.9248	23.043	23.4283	23.4703	23.6067	22.9348	23.6653	23.0767	23.5273	22.4085	22.032	22.7913	22.4326	22.8425	23.6055	23.5891	23.3539	22.6639	22.957	23.5176	23.6303	23.1105	23.3301	23.1966	23.3316					+						quarterMIC_Ctrl	6	6	6	35.8	35.8	35.8	11.024	0	44.916
24.1555	24.3877	24.1448	24.2909	24.5408	24.0051	24.2105	23.8998	24.1793	24.0271	23.9747	23.8468	24.0993	24.221	24.0895	24.2351	24.0917	24.2685	24.1479	24.1173	24.091	24.2411	24.0146	24.2623	23.8101	24.019	24.1348	24.1278	24.127	24.1038												9	9	9	38.7	38.7	38.7	32.359	0	60.551
22.9855	23.5322	22.7876	24.0103	23.9098	23.2118	23.8393	23.8953	24.0435	23.6972	24.0661	23.8442	23.9303	23.8343	23.9008	23.7266	23.9341	23.873	24.0138	23.7187	23.75	23.7691	23.77	23.9652	24.3888	24.2597	23.842	24.1865	24.2923	23.6622					+	+	+				halfMIC_Ctrl;MIC_Ctrl;quarterMIC_Ctrl	9	9	9	83.9	83.9	83.9	16.939	0	76.035
23.4671	23.6064	23.4843	23.8773	23.641	23.7262	24.162	23.7514	23.8325	23.9387	23.8677	23.6194	23.8891	24.1081	24.1106	24.1947	24.2675	24.2241	24.1964	23.9728	23.9093	23.9957	24.1602	24.2484	23.8616	24.1247	23.8718	23.9343	24.1372	24.0597					+	+	+				halfMIC_Ctrl;MIC_Ctrl;quarterMIC_Ctrl	8	8	8	39.2	39.2	39.2	36.071	0	77.754
25.8766	26.0109	25.7166	26.1318	26.3594	25.9958	26.3788	26.1305	26.1762	26.2303	26.2561	26.265	26.4282	26.4745	26.4443	26.2597	26.4693	26.4956	26.441	26.3261	26.1612	26.3946	26.4419	26.4242	26.1428	26.5381	26.3649	26.1759	26.4141	26.1217					+	+	+				halfMIC_Ctrl;MIC_Ctrl;quarterMIC_Ctrl	16	16	16	77.1	77.1	77.1	37.513	0	323.31
27.5041	27.8133	27.5063	27.8293	28.0034	27.685	27.9475	27.7708	27.9356	27.9751	28.0721	27.8996	28.1643	28.022	28.1053	28.2118	28.1102	28.1673	28.1382	28.0939	28.0131	28.149	28.1327	28.2654	27.8035	28.1834	28.1434	27.9151	28.1973	28.0572					+	+	+				halfMIC_Ctrl;MIC_Ctrl;quarterMIC_Ctrl	20	20	20	55.3	55.3	55.3	51.802	0	227.55
25.2793	25.5006	25.2791	25.5406	25.7001	25.4227	25.6308	25.5058	25.6428	25.6333	25.7006	25.6066	25.7546	25.6924	25.9207	25.9655	25.7766	25.7274	25.805	25.7434	25.6758	25.977	25.9897	25.9115	25.6406	25.8256	25.6734	25.638	25.7854	25.7472					+	+	+				halfMIC_Ctrl;MIC_Ctrl;quarterMIC_Ctrl	15	15	15	46.7	46.7	46.7	54.72	0	243.14
22.4888	22.8375	22.6462	22.7212	22.7241	22.9107	22.8291	22.8621	22.8265	22.8595	22.8688	23.0146	23.2477	23.1383	22.9878	23.3446	22.9474	23.3589	23.1689	22.8231	22.8184	22.8618	23.0251	23.1242	23.1673	23.0856	23.1761	22.8343	22.9511	22.9111					+	+	+				halfMIC_Ctrl;MIC_Ctrl;quarterMIC_Ctrl	12	12	12	35.3	35.3	35.3	51.341	0	30.494
22.6881	23.0108	22.7606	22.932	23.1477	22.696	23.1489	22.7424	23.2248	23.2036	23.1623	23.3137	23.2607	23.2229	23.0957	23.2838	23.0484	23.32	23.2947	22.8027	22.958	23.3659	23.3487	22.9976	22.8786	23.4194	23.4125	23.0977	23.2894	23.0473					+	+	+				halfMIC_Ctrl;MIC_Ctrl;quarterMIC_Ctrl	8	8	8	25.7	25.7	25.7	47.034	0	40.06
20.233	22.0905	19.8975	20.6456	20.3449	20.3203	18.991	20.42	19.5241	19.8147	20.0637	19.4813	19.398	23.0994	20.659	20.6732	22.8186	18.9667	21.2768	22.1011	20.2558	22.0839	19.5766	20.4194	22.8621	19.8192	22.351	20.3324	20.4037	22.3715												2	2	2	25.7	25.7	25.7	12.282	0	10.066
22.4095	22.4936	22.3968	22.3928	22.7425	23.3167	21.912	21.9437	22.6789	22.3148	22.258	21.9692	22.0299	22.0381	22.1064	21.937	22.0849	21.869	22.0209	22.0864	22.4379	21.9752	22.0823	22.1743	21.9364	22.0962	22.0501	21.9493	18.8022	22.2978						+	+				halfMIC_Ctrl;MIC_Ctrl	5	5	5	18.3	18.3	18.3	38.424	0	9.4482
23.8763	24.1916	24.0302	24.3683	24.4141	24.2768	24.4933	24.0683	24.4775	24.5753	24.6119	24.5669	24.7981	24.654	24.6845	24.9541	24.7255	24.853	24.725	24.5736	24.6405	24.879	24.9039	24.8035	24.2775	24.7727	24.8103	24.7161	24.7781	24.7179					+	+	+				halfMIC_Ctrl;MIC_Ctrl;quarterMIC_Ctrl	10	10	10	43.6	43.6	43.6	34.42	0	59.622
22.9866	20.7828	22.4177	20.99	20.5198	21.0406	20.3323	20.4976	20.4911	20.3024	20.5203	20.8324	20.116	20.1401	20.2687	20.6722	20.3478	20.2724	20.6761	20.5589	20.5626	20.4542	20.3189	20.666	20.3245	20.0543	20.2639	20.3369	20.2193	20.1679					+	+	+				halfMIC_Ctrl;MIC_Ctrl;quarterMIC_Ctrl	6	6	6	16.3	16.3	16.3	65.573	0	7.1548
23.2746	23.3028	23.1739	23.4448	23.4325	23.3593	23.3685	23.4096	23.3687	23.5845	23.4922	23.5478	23.5821	23.657	23.5722	23.7262	23.6054	23.7946	23.6277	23.3044	23.6131	23.8397	23.7809	23.6332	23.5249	23.4757	23.6798	23.5132	23.7521	23.6442					+	+	+				halfMIC_Ctrl;MIC_Ctrl;quarterMIC_Ctrl	15	15	15	47.9	47.9	47.9	51.965	0	49.863
23.3158	22.8605	23.2371	21.9478	19.8454	22.3376	21.0583	21.2647	21.2122	20.7038	21.2153	20.6155	19.271	20.4568	20.5808	20.6468	20.474	20.5233	20.192	20.899	20.9	20.9295	19.5718	20.9261	21.0179	19.0741	20.8368	20.6936	20.4892	20.0154					+	+	+				halfMIC_Ctrl;MIC_Ctrl;quarterMIC_Ctrl	4	4	4	79.7	79.7	79.7	8.973	0	110.45
23.217	23.3388	23.4966	22.8682	23.3127	23.2926	22.8471	23.0302	22.8228	23.089	22.8339	23.3016	22.9773	22.9469	22.9682	22.9392	22.8644	22.6486	22.9695	22.8691	23.0872	22.7692	23.1868	22.6753	23.1117	22.8929	22.9589	23.0868	22.7803	22.8746					+	+	+				halfMIC_Ctrl;MIC_Ctrl;quarterMIC_Ctrl	7	7	7	18.5	18.5	18.5	45.604	0	33.259
29.4206	29.414	29.3909	29.3593	29.4022	29.4065	29.4485	29.4161	29.4796	29.4195	29.5504	29.4088	29.2445	29.4046	29.4204	29.473	29.3654	29.4196	29.3211	29.3823	29.3316	29.3994	29.1644	29.4085	29.565	29.4568	29.3512	29.6401	29.4138	29.4864												25	25	25	68.5	68.5	68.5	41.036	0	323.31
24.7299	25.0262	24.9984	25.0968	25.1157	25.0415	24.7478	24.6278	25.0309	24.8628	24.7862	24.8584	25.219	25.0718	24.9778	24.9292	25.0339	24.9986	25.1891	25.193	25.2461	25.1724	25.1176	25.1253	25.0528	25.0533	25.0833	25.0511	25.0509	25.042							+				MIC_Ctrl	9	9	9	46.4	46.4	46.4	20.884	0	64.965
21.4146	21.3224	20.5739	21.3193	21.6251	21.1381	21.5484	21.5671	21.5401	21.4971	21.5792	22.243	22.0669	21.9006	21.9723	21.7894	21.6793	22.1691	21.9899	21.9551	21.9496	21.928	22.1358	21.9898	21.5484	22.1075	21.8745	21.5669	21.8213	22.0109					+	+	+				halfMIC_Ctrl;MIC_Ctrl;quarterMIC_Ctrl	5	5	5	17.6	17.6	17.6	41.33	0	72.903
25.1151	25.4439	25.1333	25.342	25.4894	25.1647	25.3619	25.3338	25.6358	25.4338	25.5872	25.4852	25.7048	25.6216	25.6742	25.6335	25.6207	25.6699	25.6685	25.6075	25.5822	25.6857	25.6275	25.7432	25.4828	25.6246	25.6485	25.591	25.6274	25.6261					+	+	+				halfMIC_Ctrl;MIC_Ctrl;quarterMIC_Ctrl	17	17	17	41.5	41.5	41.5	66.313	0	113.19
22.7731	22.9601	22.8269	22.6476	22.7299	22.7219	22.4847	22.1553	22.3162	22.4552	20.4665	22.382	22.4814	22.5306	22.5319	22.5928	22.5777	22.3253	22.5091	22.2837	22.7369	22.6424	22.7502	22.6969	22.222	22.5994	22.3991	22.4335	22.2963	22.4977					+	+	+				halfMIC_Ctrl;MIC_Ctrl;quarterMIC_Ctrl	4	4	4	63	63	63	12.534	0	57.214
26.1032	26.2996	26.1897	26.3162	26.5437	26.0538	26.4383	26.2507	26.5034	26.5689	26.5434	26.385	26.6919	26.5989	26.6513	26.7615	26.6473	26.7397	26.6827	26.6037	26.6871	26.7029	26.7253	26.7113	26.3864	26.5874	26.6403	26.4773	26.5586	26.5024					+	+	+				halfMIC_Ctrl;MIC_Ctrl;quarterMIC_Ctrl	14	14	14	46.6	46.6	46.6	43.205	0	319.59
23.022	23.1983	23.0692	23.1509	23.0895	23.3301	23.4475	23.1061	23.5575	23.5459	23.5213	23.0716	23.6849	23.5564	23.4922	23.8264	23.6618	23.8913	23.746	23.791	23.4952	23.696	23.8719	23.8088	23.2708	23.4089	23.6875	23.4654	23.5827	23.5065					+	+	+				halfMIC_Ctrl;MIC_Ctrl;quarterMIC_Ctrl	10	10	10	47.4	47.4	47.4	36.052	0	181.48
22.4871	22.8179	22.9029	22.9428	23.1471	22.8131	22.9671	22.9679	23.1814	23.0508	23.1275	23.0996	23.2461	23.3272	23.3131	23.3481	23.26	23.3395	23.2225	23.3439	23.1673	23.3641	23.4193	23.5385	22.9172	23.2502	23.3182	23.0754	23.213	23.1676					+	+	+				halfMIC_Ctrl;MIC_Ctrl;quarterMIC_Ctrl	7	7	7	23.3	23.3	23.3	41.89	0	44.879
23.2478	23.3729	23.223	23.663	23.3214	23.3564	23.5485	23.2221	23.705	23.5951	23.929	24.146	23.73	23.7825	23.9321	23.8198	23.9893	23.4366	23.9002	23.5191	23.832	24.1076	23.4811	23.7175	23.5421	23.8829	23.9317	23.503	23.809	23.6412					+	+	+				halfMIC_Ctrl;MIC_Ctrl;quarterMIC_Ctrl	6	6	6	37.7	37.7	37.7	27.502	0	70.44
27.4623	27.5861	27.5125	27.6419	27.5597	27.5803	27.6718	27.5235	27.6398	27.697	27.6973	27.6109	27.5834	27.6236	27.7234	27.8479	27.7139	27.7309	27.613	27.7372	27.624	27.732	27.5512	27.7455	27.6758	27.7049	27.6389	27.6334	27.7042	27.7677					+	+	+				halfMIC_Ctrl;MIC_Ctrl;quarterMIC_Ctrl	24	24	24	55.1	55.1	55.1	63.218	0	297.83
26.4156	26.4763	26.3405	26.3891	26.4106	26.229	26.5005	26.361	26.5333	26.5351	26.5433	26.4082	26.4688	26.5311	26.5171	26.535	26.488	26.5274	26.6053	26.4418	26.4405	26.5104	26.4828	26.5291	26.3883	26.5557	26.5219	26.4558	26.4957	26.3807						+	+				halfMIC_Ctrl;MIC_Ctrl	20	20	20	59.7	59.7	59.7	42.89	0	323.31
28.7126	28.9093	28.7638	28.9812	28.9733	28.8697	28.9991	28.843	29.0958	29.1266	29.1273	28.9031	29.0564	29.1135	29.139	29.2135	29.0242	29.1415	29.0566	29.0895	29.0214	28.6512	29.007	29.1189	29.011	29.0971	29.1559	29.1564	29.0999	29.249					+	+					halfMIC_Ctrl;quarterMIC_Ctrl	19	19	19	60	60	60	29.094	0	270.49
25.6408	25.7306	25.8148	25.7064	25.811	25.6513	25.6662	25.8223	25.9185	25.8348	25.8339	26.0007	25.7899	25.7382	25.5346	25.7732	25.679	25.7271	25.6943	25.8243	25.7474	25.7156	25.7628	25.6518	25.7257	25.9266	25.8311	25.7159	25.7694	25.8168												19	19	19	47	47	47	63.757	0	150.93
21.5345	21.9378	21.9442	21.9298	21.8512	22.0134	21.8599	21.4299	21.7532	21.6151	21.7798	21.4481	21.7854	21.8778	21.5992	21.83	21.8854	21.8432	22.0046	21.793	21.8834	21.9673	21.9409	22.3584	21.6773	21.7728	21.971	21.5364	21.9401	22.0817												4	4	4	26.7	26.7	26.7	21.742	0	65.586
20.3829	21.8916	21.7081	19.0188	19.478	19.4219	21.026	22.6313	19.8999	22.1923	22.4651	22.4304	22.3728	22.5325	22.1173	22.2257	22.1689	22.2178	21.9355	21.9149	22.0406	22.2624	21.9791	20.6792	19.2926	22.3385	22.2168	20.0358	22.1756	22.0228						+	+				halfMIC_Ctrl;MIC_Ctrl	4	4	4	23.2	23.2	23.2	26.913	0	20.576
29.1027	28.42	28.9675	28.2215	28.0445	28.0534	27.5496	28.4969	27.9809	27.8954	27.4013	28.2156	26.5089	26.5338	26.296	25.9442	26.3844	25.9371	24.9601	25.4387	26.073	25.5657	24.8717	24.9046	28.1944	27.1012	27.0976	27.73	27.0849	27.4075					+	+	+		+		halfMIC_Ctrl;halfMIC_quarterMIC;MIC_Ctrl;quarterMIC_Ctrl	10	10	10	91.5	91.5	91.5	6.5536	0	97.05
27.6778	27.7893	27.7219	27.9206	27.917	27.7727	27.9313	27.8019	27.9838	27.9366	28.0207	27.8257	28.0303	28.0732	28.0827	28.2073	28.0618	28.1241	28.1027	28.0294	28.0617	28.1226	28.1493	28.1646	27.9652	28.1078	27.9812	27.9997	27.9809	28.0617					+	+	+				halfMIC_Ctrl;MIC_Ctrl;quarterMIC_Ctrl	34	34	34	54.2	54.2	54.2	77.87	0	323.31
24.8949	25.144	25.1212	25.2834	25.2857	25.1615	25.3282	25.197	25.3167	25.3494	25.3685	25.1916	25.2967	25.4471	25.3225	25.6033	25.3443	25.552	25.4142	25.3026	25.3212	25.4327	25.2816	25.4875	25.2985	25.2785	25.2651	25.3716	25.4392	25.4516					+	+	+				halfMIC_Ctrl;MIC_Ctrl;quarterMIC_Ctrl	10	10	10	35.3	35.3	35.3	48.502	0	119.85
22.4045	22.4738	22.216	22.5535	22.5625	22.423	19.8423	21.8368	20.5829	22.2809	22.2811	22.241	22.2498	22.1517	22.3418	22.552	22.2828	22.2054	22.5864	22.251	22.3326	22.1947	22.5282	22.5631	22.1063	22.2943	22.2773	20.2145	22.246	22.2603												5	5	5	45.2	45.2	45.2	21.151	0	16.327
24.7106	25.1335	24.9215	25.0664	25.1154	24.8268	25.2394	24.8998	25.1795	25.3037	25.2559	25.0915	25.3646	25.2961	25.2961	25.4113	25.2241	25.2664	25.3151	25.3253	25.314	25.5051	25.3297	25.4041	24.9997	25.1872	25.3394	25.2056	25.2667	25.1528					+	+	+				halfMIC_Ctrl;MIC_Ctrl;quarterMIC_Ctrl	21	21	21	62.1	62.1	62.1	49.24	0	159.11
23.1704	22.4439	22.8958	22.8061	22.4456	22.0069	22.1831	21.2975	22.3057	22.3329	22.4535	22.1139	22.5322	22.4022	22.2946	22.634	22.656	22.783	22.5426	22.5222	22.327	22.1531	22.6459	22.8588	21.9193	22.221	22.7389	22.5657	22.641	22.5267												8	8	8	40.5	40.5	40.5	22.262	0	15.946
24.2436	24.4087	24.2216	24.3715	24.5273	24.4493	24.5836	24.2951	24.7683	24.567	24.6122	24.4438	24.7991	24.7506	24.6617	24.8278	24.7156	24.9035	24.5857	24.5192	24.5103	24.7517	24.5652	24.7164	24.507	24.6433	24.7759	24.6305	24.7596	24.6908					+	+	+				halfMIC_Ctrl;MIC_Ctrl;quarterMIC_Ctrl	8	8	8	36.1	36.1	36.1	34.27	0	24.611
26.6364	27.0227	26.6856	27.0496	27.1088	26.8541	27.0897	26.9783	27.082	27.0844	27.1651	27.0477	27.2299	27.1621	27.1916	27.2991	27.211	27.2991	27.2289	27.1061	27.2372	27.3569	27.3415	27.2587	27.0377	27.2565	27.1854	27.1701	27.2769	27.1341					+	+	+				halfMIC_Ctrl;MIC_Ctrl;quarterMIC_Ctrl	20	20	20	50.2	50.2	50.2	49.157	0	228.85
25.4431	25.6272	25.3633	25.5967	25.7633	25.6515	25.8103	25.5848	25.6835	25.7673	25.7954	25.6858	25.7928	25.827	25.8444	25.7104	25.9005	25.8603	25.841	25.7818	25.8024	26.0054	25.6309	25.6782	25.8478	25.8233	25.729	25.7879	25.8854	25.6943					+	+	+				halfMIC_Ctrl;MIC_Ctrl;quarterMIC_Ctrl	17	17	17	50.8	50.8	50.8	50.705	0	163.66
24.4588	24.6859	24.6403	24.7426	24.7314	24.2972	24.6884	24.6418	24.8126	24.7821	24.8922	24.7686	25.0895	24.9262	24.7837	25.0297	24.9558	25.0829	24.9026	24.8882	24.8025	24.8562	24.9582	24.9856	24.8364	24.9042	25.0793	24.8172	24.9473	24.9397					+	+	+				halfMIC_Ctrl;MIC_Ctrl;quarterMIC_Ctrl	14	14	14	51.9	51.9	51.9	27.192	0	65.604
24.7537	25.2436	24.9726	25.3198	25.5542	25.0051	25.3052	25.2513	25.4867	25.5264	25.4387	25.4179	25.7077	25.6136	25.4811	25.5484	25.6536	25.673	25.5846	25.4865	25.4849	25.6123	25.6324	25.5959	25.1812	25.5312	25.5279	25.3734	25.6212	25.5307					+	+	+				halfMIC_Ctrl;MIC_Ctrl;quarterMIC_Ctrl	20	20	20	55.2	55.2	55.2	49.603	0	123.2
20.4254	21.1388	20.7444	20.9711	20.9367	20.9929	20.1342	20.8106	20.7009	20.7895	19.2588	20.167	21.0982	21.2395	21.3947	21.2651	21.2117	19.5177	20.3537	20.0336	21.2202	20.6096	20.3648	21.4386	20.6107	19.933	20.8501	21.297	19.8193	20.7273												1	1	1	11.4	11.4	11.4	18.029	0	3.0334
20.739	19.7757	21.2874	19.8563	19.6991	20.4088	20.1078	19.8015	18.8156	18.7924	19.4869	20.1988	19.3626	19.4859	18.7896	19.0887	19.4319	18.2975	20.4604	20.0519	20.8147	20.231	19.4339	21.8956	19.6753	20.3085	19.8188	20.8394	20.1255	19.8351						+					halfMIC_Ctrl	2	2	2	2.5	2.5	2.5	57.635	0.0051993	1.7548
22.1764	22.7665	22.4182	22.5269	23.0349	22.483	22.852	22.6172	22.8545	22.7864	22.9197	23.1128	23.0907	22.6953	23.0088	22.9674	23.0696	23.1474	22.9907	22.8811	23.0991	23.0599	23.388	23.3348	22.7033	23.1959	22.8209	22.7102	23.0763	22.6178						+	+				halfMIC_Ctrl;MIC_Ctrl	7	7	7	33.6	33.6	33.6	23.599	0	46.031
23.1974	23.9036	23.4623	23.8144	23.6809	23.5162	23.7818	23.6708	23.8741	23.9499	24.0499	23.7465	24.111	23.9854	23.8868	23.8746	23.9685	24.16	23.8549	23.929	23.7224	23.9597	23.9434	23.9889	23.6105	24.163	24.0498	23.5109	24.2404	24.1107						+	+				halfMIC_Ctrl;MIC_Ctrl	8	8	8	40.3	40.3	40.3	34.775	0	47.457
24.1363	24.3874	23.9858	24.2759	24.5072	24.4385	23.8306	23.8131	24.0358	24.1436	24.2413	24.2512	24.2911	24.3886	24.1808	24.3134	24.1787	24.375	24.2798	24.1409	24.2764	24.1193	24.476	24.4374	23.9218	24.2028	24.2692	23.9869	24.3075	24.1478												14	14	14	52.4	52.4	52.4	40.937	0	163.59
23.6855	23.6609	24.0946	23.8426	23.863	23.6701	23.5693	23.4933	23.693	23.7349	23.5759	23.7441	23.6842	23.7576	23.53	23.6569	23.6089	23.8078	23.8467	23.7079	24.0264	24.0449	23.7489	23.8751	23.6684	23.6736	23.732	23.6282	23.7282	23.7174												6	6	6	59.7	59.7	59.7	16.575	0	98.02
23.1562	23.6627	23.1466	23.3424	23.7481	23.5002	23.6323	23.6106	23.8177	23.5978	23.7017	23.57	23.905	23.8717	23.8567	24.185	23.9798	23.9775	23.9152	23.8026	23.7053	24.0303	23.8473	24.1902	23.8045	23.9306	24.0635	23.6311	23.8438	23.8194					+	+	+				halfMIC_Ctrl;MIC_Ctrl;quarterMIC_Ctrl	11	11	11	37.8	37.8	37.8	48.684	0	72.014
23.3381	23.6737	23.5329	23.8362	23.5839	23.589	23.7259	23.7291	24.0622	23.8209	23.6631	23.6782	23.8559	23.9949	23.9401	24.0494	23.9811	23.9912	23.7968	23.8272	23.8184	23.8479	23.9302	24.1304	23.6345	23.6806	23.957	23.9004	23.9492	23.8925					+	+	+				halfMIC_Ctrl;MIC_Ctrl;quarterMIC_Ctrl	8	8	8	32	32	32	46.236	0	67.279
25.6553	25.9368	25.7384	25.9283	26.0398	25.8132	26.0175	25.8333	26.0353	25.992	26.143	25.975	26.0859	26.128	26.0545	26.176	26.1309	26.2107	26.0976	26.1575	26.1128	26.2032	26.0681	26.1217	25.8606	26.0954	26.1073	25.891	26.1022	25.992						+	+				halfMIC_Ctrl;MIC_Ctrl	17	17	17	62.1	62.1	62.1	33.616	0	166.75
22.0494	23.334	22.0078	22.6562	22.3746	19.9959	23.055	23.1895	23.1242	22.979	22.5693	23.3689	22.7831	22.5464	21.8372	22.2769	22.4736	22.736	22.063	22.8504	20.7714	22.5026	22.0231	21.3478	23.1583	23.3257	22.9329	22.9119	23.2554	22.7923												4	4	4	51.2	51.2	51.2	9.6713	0	28.614
25.7152	25.8328	25.9533	25.8107	25.9859	25.8277	25.9249	25.8181	26.0895	26.0393	25.9464	26.0089	26.091	26.1486	26.0895	26.0546	26.0935	26.0671	26.0597	26.0317	26.0031	26.1671	26.1016	26.0414	25.8748	26.1017	26.0982	26.0085	26.1459	26.1113					+	+	+				halfMIC_Ctrl;MIC_Ctrl;quarterMIC_Ctrl	19	19	19	54.8	54.8	54.8	49.265	0	153.95
22.0793	22.2502	22.4821	22.316	22.5079	22.1855	21.895	22.0131	22.3362	22.0903	22.2242	22.1052	22.4198	22.5229	22.3182	22.4226	22.268	22.2462	22.5863	22.2163	22.1435	22.482	22.5013	22.5598	22.3011	22.1221	22.3761	22.4301	22.0876	22.1988												9	9	9	14.3	14.3	14.3	83.404	0	36.184
21.8098	22.411	22.098	22.4488	22.5516	22.5515	22.7753	22.2501	22.9369	22.6807	22.7273	22.4525	22.7579	22.8586	22.8384	23.0091	22.9757	23.1916	23.1459	22.807	22.7405	23.0711	22.8697	23.1451	22.6766	22.9741	22.8232	22.71	22.9526	22.7721					+	+	+				halfMIC_Ctrl;MIC_Ctrl;quarterMIC_Ctrl	5	5	5	23	23	23	37.855	0	29.637
22.4383	22.2323	22.3723	22.2728	21.9881	22.3709	22.4539	22.4019	22.4049	22.3795	22.3844	22.4909	22.0952	22.3911	22.0394	22.1967	22.1962	22.269	22.3737	22.2296	22.4801	22.3255	22.6506	21.9928	22.3835	22.4146	22.3968	22.5229	22.1328	22.7253												9	9	9	23	23	23	63.609	0	33.538
23.3407	23.6619	23.642	23.6514	23.809	23.523	23.7663	23.5408	23.8735	23.862	23.7788	23.8106	23.952	23.7855	23.56	23.5385	23.7851	24.012	23.7025	24.1743	23.8138	24.0056	23.9075	24.2949	23.4613	24.043	23.8753	23.5124	23.8674	23.7542							+				MIC_Ctrl	11	11	11	72.6	72.6	72.6	19.855	0	28.332
24.0859	24.3498	24.1652	24.5267	24.656	24.0922	24.5581	24.3308	24.6671	24.5741	24.7066	24.4391	24.7487	24.7859	24.8565	24.8253	24.7618	24.7992	24.6403	24.7345	24.6494	24.6898	24.6543	24.5287	24.4547	24.8188	24.7572	24.6243	24.8423	24.7278					+	+	+			+	halfMIC_Ctrl;MIC_Ctrl;MIC_halfMIC;quarterMIC_Ctrl	22	22	22	36.1	36.1	36.1	90.997	0	187.82
25.0132	25.0876	25.0854	25.497	25.5368	25.3475	25.1809	24.7812	25.0442	25.0303	25.1661	25.003	25.3727	25.2313	25.3032	25.4664	25.2998	25.5135	25.3329	25.3581	25.3536	25.4662	25.3881	25.6069	24.8829	25.2045	25.38	25.0694	25.2711	25.2779												8	8	8	67.1	67.1	67.1	18.005	0	126.75
23.2098	23.3052	23.0216	23.3824	23.3441	23.3491	23.5025	23.2901	23.4406	23.5327	23.6982	23.2362	23.74	23.7803	23.5838	23.6347	23.7249	23.7186	23.6498	23.6176	23.1883	23.3321	23.6134	23.4887	23.2108	23.7857	23.7039	23.5709	23.7052	23.5412					+	+	+				halfMIC_Ctrl;MIC_Ctrl;quarterMIC_Ctrl	7	7	7	39.7	39.7	39.7	28.024	0	53.718
22.598	22.4764	22.7255	22.2036	22.8821	22.0627	22.1873	21.9699	22.2542	22.2886	22.0605	22.4196	21.8969	22.2488	21.9177	21.7994	21.9461	22.0313	22.1689	21.893	21.9217	22.0439	22.2746	21.954	21.7339	22.2395	22.0709	21.7955	22.2184	21.9693					+	+	+				halfMIC_Ctrl;MIC_Ctrl;quarterMIC_Ctrl	6	6	6	31.4	31.4	31.4	31.192	0	46.71
23.6222	24.3026	23.7256	24.1258	24.4188	24.0595	23.7062	23.3545	23.9389	23.7849	23.752	23.8436	24.049	23.7635	23.666	23.676	23.7575	23.8851	23.9168	23.7818	23.6982	23.8487	24.0667	23.9453	23.3395	23.9878	24.0935	23.3129	24.0754	23.7481												7	7	7	39.9	39.9	39.9	18.117	0	100.34
23.822	24.3408	23.967	24.167	24.5006	24.2291	24.3691	24.2043	24.4156	24.5402	24.3938	24.4648	24.8716	24.805	24.6716	24.7402	24.716	24.7909	24.7212	24.6414	24.6121	24.517	24.8374	24.6951	24.3016	24.8288	24.6968	24.2786	24.753	24.4977					+	+	+				halfMIC_Ctrl;MIC_Ctrl;quarterMIC_Ctrl	13	13	13	39.6	39.6	39.6	49.188	0	83.168
23.6713	23.9914	23.8429	23.9415	24.0341	23.7704	24.0373	23.8592	24.0973	23.9856	24.2137	23.9799	23.9573	24.0875	24.1911	24.0171	24.1571	24.223	24.1899	24.1156	23.9893	24.0356	24.138	24.1931	23.9499	24.015	24.0283	23.872	24.0931	24.195						+	+				halfMIC_Ctrl;MIC_Ctrl	10	10	10	57.8	57.8	57.8	29.448	0	64.204
27.2421	27.5263	27.3398	27.6634	27.7248	27.5229	27.766	27.4969	27.8436	27.6239	27.8245	27.6165	27.9096	27.9963	27.8975	27.9333	27.9454	28.0224	27.8961	27.9487	27.852	27.9426	27.826	27.8981	27.7039	27.8882	27.837	27.7362	27.8497	27.8306					+	+	+				halfMIC_Ctrl;MIC_Ctrl;quarterMIC_Ctrl	28	28	28	65.9	65.9	65.9	53.62	0	323.31
25.4645	25.8128	25.6608	25.9362	25.9548	25.748	25.8442	25.7729	26.0248	26.0254	26.0429	25.935	26.0788	26.1509	26.1403	26.0843	26.1807	26.2017	26.1712	26.1318	26.1008	26.2234	26.1963	26.1022	25.941	26.047	26.0437	25.9912	26.0139	26.0708					+	+	+				halfMIC_Ctrl;MIC_Ctrl;quarterMIC_Ctrl	28	28	28	43.9	43.9	43.9	98.519	0	323.31
29.8326	29.9248	29.7181	29.909	29.9074	29.9993	30.0748	29.8858	30.0141	29.957	30.1028	29.9064	30.016	30.146	30.1569	30.249	30.1579	30.1853	30.1315	30.0946	30.1285	30.1247	30.0995	30.1768	29.9951	30.0598	30.0646	30.1075	30.0509	30.0342					+	+	+				halfMIC_Ctrl;MIC_Ctrl;quarterMIC_Ctrl	21	21	21	72.9	72.9	72.9	35.246	0	323.31
23.4948	23.6994	23.5703	23.5774	23.6062	23.2504	23.7285	23.5988	23.7326	23.6267	23.6004	23.753	24.0299	23.8603	23.8955	23.841	23.9982	24.0794	23.8702	24.0526	23.7488	23.9999	24.0417	23.7951	23.6708	24.1348	23.8799	23.7482	23.8747	23.723					+	+	+				halfMIC_Ctrl;MIC_Ctrl;quarterMIC_Ctrl	7	7	7	40.5	40.5	40.5	23.074	0	38.894
22.9541	23.6269	23.0633	23.4871	23.4808	22.8232	23.5034	23.3327	23.5895	23.5451	23.5698	23.6247	23.5894	23.6826	23.7256	23.6398	23.8516	23.8192	23.7422	23.4234	23.4977	23.3749	23.6291	23.5444	23.5769	23.4475	23.688	23.5072	23.5782	23.5841					+	+	+				halfMIC_Ctrl;MIC_Ctrl;quarterMIC_Ctrl	7	7	7	31.6	31.6	31.6	39.741	0	106.81
21.8067	21.7078	21.7162	21.7581	21.8603	21.5954	21.7044	21.3653	21.6833	21.6192	21.5761	20.8853	20.377	19.4656	21.3981	21.6246	21.9336	21.6961	20.7785	21.4842	20.0719	21.5293	21.8767	21.7835	21.7052	21.5993	21.7113	21.1141	21.7274	21.6291												5	5	5	13.9	13.9	13.9	56.057	0	10.207
22.3486	22.2256	22.349	22.43	22.2773	22.5438	22.5448	22.5617	22.5773	22.331	22.7076	22.3537	22.706	22.669	22.7676	22.7947	22.7093	22.8765	23.0267	22.6069	23.0168	22.857	22.789	22.9403	22.3059	22.9418	22.6981	22.7262	22.6713	22.713					+	+	+				halfMIC_Ctrl;MIC_Ctrl;quarterMIC_Ctrl	4	4	4	22.5	22.5	22.5	32.918	0	16.233
28.9985	28.5906	29.1327	28.8294	28.731	28.7678	28.4788	28.6418	28.7538	28.7786	28.6928	28.6022	28.7121	28.7354	28.7271	28.8474	28.6242	28.7465	28.8953	29.1304	29.2381	28.8059	28.5596	28.7352	28.8439	28.5797	28.7165	28.8799	28.5639	28.8488												12	12	12	71.7	71.7	71.7	10.615	0	87.619
24.2904	23.8781	23.9739	24.058	23.8194	24.143	23.9721	24.0741	24.3547	24.362	24.3707	24.22	24.407	24.5104	24.3387	24.4364	24.515	24.525	24.4217	24.4088	24.5476	24.8413	24.5408	24.7526	24.6664	24.439	24.4343	24.3802	24.2958	24.1466					+	+	+				halfMIC_Ctrl;MIC_Ctrl;quarterMIC_Ctrl	12	12	12	68.9	68.9	68.9	20.559	0	30.458
25.1459	25.5492	25.3618	25.4992	25.539	25.3282	25.6857	25.3719	25.5129	25.6147	25.62	25.5527	25.7079	25.5904	25.6752	25.7504	25.7138	25.7052	25.6843	25.5692	25.5975	26.008	25.7925	25.688	25.3975	25.6572	25.6341	25.5025	25.6779	25.6205					+	+	+				halfMIC_Ctrl;MIC_Ctrl;quarterMIC_Ctrl	27	27	27	41.2	41.2	41.2	98.968	0	189.44
22.0686	22.3546	22.6969	22.3111	22.2421	22.1932	21.6416	21.5865	22.1969	22.2032	22.0608	22.3257	22.4713	22.0171	21.7081	21.7752	21.8822	22.0597	22.316	22.5441	22.4537	21.7887	19.9768	21.7986	21.7988	22.4567	20.1165	21.9346	22.2959	22.5798						+					halfMIC_Ctrl	3	3	3	26	26	26	17.491	0	5.2708
22.2965	22.1595	21.9631	21.9389	22.1154	21.7294	22.2105	22.2563	22.5602	22.267	22.5025	21.9029	22.4141	22.427	22.6838	22.7772	22.5196	22.8295	22.4209	22.2663	21.6318	22.1596	22.2669	22.7457	22.1995	22.5221	22.4871	22.337	22.7139	22.5198					+	+					halfMIC_Ctrl;quarterMIC_Ctrl	8	8	8	26	26	26	54.622	0	30.602
26.2693	25.9789	26.4135	26.1841	26.0811	26.0795	25.9692	25.9617	26.0833	26.0275	26.1712	25.6754	25.9627	25.9876	26.0173	26.1803	26.037	26.1304	25.9363	26.0939	25.7594	25.1281	26.1025	25.8305	26.0785	25.8001	26.0157	26.2293	25.943	26.252							+				MIC_Ctrl	15	15	15	43.7	43.7	43.7	36.591	0	71.252
23.3856	23.6351	23.5561	23.5913	23.7189	23.3964	23.6853	23.4528	23.8122	23.6413	23.835	23.8167	23.9458	23.876	23.5845	24.0468	23.8087	23.8964	23.9045	23.5734	23.6525	23.7786	23.6125	23.4974	23.5311	23.926	23.8576	23.6857	23.9042	23.8524					+	+					halfMIC_Ctrl;quarterMIC_Ctrl	10	10	10	41.6	41.6	41.6	34.733	0	62.047
32.3315	32.3367	32.3268	32.3328	32.4522	32.4139	32.4344	32.3691	32.4451	32.4731	32.541	32.353	32.455	32.477	32.44	32.6521	32.4789	32.5669	32.6264	32.5411	32.6101	32.5558	32.6038	32.7518	32.4158	32.4124	32.5195	32.5219	32.5157	32.5889					+	+	+				halfMIC_Ctrl;MIC_Ctrl;quarterMIC_Ctrl	38	38	38	93.4	93.4	93.4	43.103	0	323.31
23.0627	22.8594	23.4784	23.212	23.5059	23.263	23.4964	23.3676	23.5466	23.5302	23.3116	23.4016	23.4406	23.5982	23.2987	23.1677	23.3639	23.4865	23.2008	23.6951	23.6777	23.3721	23.5003	23.5408	23.4296	23.4327	23.4274	23.4184	23.5393	23.6234					+		+				MIC_Ctrl;quarterMIC_Ctrl	4	4	4	27.3	27.3	27.3	21.023	0	109.07
28.6632	28.5062	28.7915	28.5406	28.3174	28.3924	28.2977	28.2699	28.4973	28.4706	28.4572	28.176	28.3613	28.3961	28.2711	28.4388	28.4175	28.4714	28.6056	28.6959	28.6973	28.5244	28.5609	28.8548	28.518	28.1527	28.3016	28.5715	28.2777	28.5944										+	MIC_halfMIC	10	10	10	86.8	86.8	86.8	10.605	0	77.161
25.5376	25.6054	25.3865	25.7655	25.8218	25.68	25.8876	25.5251	25.8317	25.7889	25.9106	25.8717	26.0046	26.0462	26.1644	26.1649	25.938	26.1028	26.0269	25.9975	26.0234	26.2761	26.136	26.1635	25.8408	25.9792	25.9378	25.9448	25.9763	25.8292					+	+	+				halfMIC_Ctrl;MIC_Ctrl;quarterMIC_Ctrl	17	17	17	59.2	59.2	59.2	40.594	0	323.31
25.1406	25.5741	25.2825	25.5437	25.8036	25.3958	25.7498	25.4577	25.5893	25.7198	25.745	25.7321	25.8865	25.8378	25.787	25.9364	25.893	26.0619	25.8481	25.7469	25.9378	26.0511	25.8638	25.975	25.6466	25.97	25.9051	25.7676	25.8618	25.7775					+	+	+				halfMIC_Ctrl;MIC_Ctrl;quarterMIC_Ctrl	22	22	22	43.5	43.5	43.5	91.785	0	287
22.0912	22.0355	21.9089	22.2481	22.3615	22.0933	22.1709	22.304	22.2433	22.2739	22.3861	22.2026	22.5721	22.7768	22.8182	23.049	22.4736	22.8496	22.926	22.5277	22.7301	23.0594	22.7626	22.818	22.1508	22.3926	22.6545	22.3903	22.7656	22.1856					+	+	+				halfMIC_Ctrl;MIC_Ctrl;quarterMIC_Ctrl	8	8	8	40.7	40.7	40.7	28.094	0	27.312
26.2232	26.2525	26.2005	26.2223	26.3332	25.9894	26.1786	25.8045	26.0956	26.0816	26.1141	26.1185	25.9042	26.0081	25.9444	26.1399	26.0563	26.0515	26.1097	26.0162	25.8934	26.1888	25.9266	26.0794	25.8772	26.1382	26.0106	25.9354	26.0132	25.9714					+	+	+				halfMIC_Ctrl;MIC_Ctrl;quarterMIC_Ctrl	10	10	10	49.4	49.4	49.4	25.705	0	212.13
25.9717	26.2437	25.9727	26.3041	26.493	26.2101	26.4075	26.2386	26.4867	26.3251	26.4939	26.31	26.6183	26.6575	26.6619	26.7233	26.5889	26.794	26.5683	26.6074	26.6323	26.6812	26.7622	26.6815	26.3765	26.7598	26.6506	26.4746	26.6585	26.5172					+	+	+				halfMIC_Ctrl;MIC_Ctrl;quarterMIC_Ctrl	37	37	37	56.2	56.2	56.2	101.72	0	257.21
22.6779	22.8216	22.5421	23.0163	23.1061	22.8702	22.5303	22.3647	22.6623	22.7019	22.8235	22.7083	22.8496	22.8687	22.973	22.7222	23.0166	23.0716	23.1739	22.7555	22.911	23.0021	22.8438	22.9334	22.4906	22.7348	22.8192	22.7791	22.8492	22.8107												7	7	7	56.6	56.6	56.6	18.251	0	24.775
23.9827	24.0245	24.0134	23.8925	23.9298	23.9022	24.0944	23.8413	24.1721	24.0636	24.117	24.0546	24.2199	24.3734	24.2818	24.4184	24.3011	24.303	24.3187	24.1151	24.1645	24.5014	24.2408	24.249	24.1354	24.1754	24.1263	24.2295	24.3269	24.2486					+	+	+				halfMIC_Ctrl;MIC_Ctrl;quarterMIC_Ctrl	5	5	5	36.3	36.3	36.3	17.002	0	30.726
20.8532	20.9624	21.0415	21.4409	21.2785	20.561	20.5413	20.535	21.0465	20.8257	20.5941	20.8418	21.618	21.449	21.1405	20.7926	21.6108	21.2236	21.2129	20.7526	21.1809	20.8061	21.608	21.2483	20.2181	21.546	21.7675	20.4585	21.5262	20.7662												4	4	4	38.9	38.9	38.9	16.791	0	11.636
18.8723	20.0318	21.4589	19.7513	19.3522	19.5494	20.3541	20.3342	20.5334	20.401	21.6063	20.5203	20.2959	20.2172	19.7998	20.1497	20.3312	20.2067	20.7119	20.4966	20.201	20.2874	19.7927	20.0597	20.4468	20.7626	19.8241	20.3745	19.7189	19.6536												2	2	2	23.1	23.1	23.1	12.791	0	13.763
25.5005	25.7879	25.4849	25.8095	25.7993	25.7808	25.8654	25.6219	25.9648	25.8555	25.9779	25.822	26.0008	25.9635	25.9601	26.1949	26.0026	26.1466	26.0456	25.876	25.9589	25.9356	26.1322	26.1625	25.7644	26.031	26.0973	25.8406	26.0652	25.9924					+	+	+				halfMIC_Ctrl;MIC_Ctrl;quarterMIC_Ctrl	18	18	18	44.1	44.1	44.1	62.668	0	225.32
22.2782	22.4126	22.1732	22.4368	22.5002	22.4928	22.6329	22.4511	22.4354	22.4384	22.762	22.4552	22.8015	22.7773	23.0352	22.569	22.9187	22.8438	22.8317	22.7114	22.8313	22.9554	22.8384	22.9306	22.469	22.5798	23.0435	22.901	22.7556	22.6228					+	+	+				halfMIC_Ctrl;MIC_Ctrl;quarterMIC_Ctrl	12	12	12	15.1	15.1	15.1	134.22	0	10.087
25.3407	25.7526	25.513	25.7611	25.787	25.8535	25.3439	25.3571	25.5692	25.5716	25.6444	25.4385	25.6092	25.6293	25.8426	25.8463	25.6471	25.7874	25.7367	25.6959	25.8278	25.7763	25.7568	26.0074	25.4579	25.574	25.606	25.7143	25.5748	25.5971												15	15	15	45.7	45.7	45.7	44.233	0	111.09
22.9386	20.9896	22.6612	20.8323	21.0398	20.4609	19.7233	21.1146	20.964	19.9645	21.0384	20.5836	19.8486	20.1744	20.3069	20.4708	18.436	19.4719	20.6428	20.2982	19.5303	20.4686	19.9546	19.5038	19.7694	19.6899	19.3713	20.1947	20.1078	19.604					+	+	+				halfMIC_Ctrl;MIC_Ctrl;quarterMIC_Ctrl	2	2	2	70.5	70.5	70.5	4.4961	0	53.344
23.0647	23.3479	23.4472	23.3462	23.4161	22.8715	22.824	22.9981	22.9432	22.7631	22.9616	23.4555	23.3196	22.9626	22.9031	22.4637	22.8217	22.5666	22.8686	23.6792	23.6543	22.7592	22.8432	22.7693	23.1934	23.1085	22.9802	22.8929	22.9712	23.0991						+					halfMIC_Ctrl	8	8	8	29.9	29.9	29.9	39.352	0	44.718
23.4865	23.6102	23.4183	23.3897	23.6501	23.4482	23.8057	23.343	23.9213	23.455	23.9983	23.7746	23.7013	23.8453	23.8986	23.9324	23.9434	23.8368	23.9758	23.582	24.0755	24.1743	23.8848	24.0501	23.5134	23.6313	23.8798	23.7773	23.7503	23.6868					+	+	+				halfMIC_Ctrl;MIC_Ctrl;quarterMIC_Ctrl	9	9	9	28.9	28.9	28.9	46.422	0	79.204
22.7165	23.2064	22.8054	23.1948	23.2231	22.8185	23.2564	22.9256	23.3144	23.2954	23.3596	23.1288	23.3402	23.219	23.5114	23.4063	23.375	23.5182	23.3367	23.368	23.2145	23.6134	23.4681	23.5317	23.0044	23.2784	23.4104	23.2006	23.2822	23.3012					+	+	+				halfMIC_Ctrl;MIC_Ctrl;quarterMIC_Ctrl	10	10	10	38.8	38.8	38.8	43.333	0	83.021
24.481	25.0978	24.7303	25.0542	25.3645	24.8444	25.1529	24.9202	25.374	25.2521	25.2717	25.1874	25.6338	25.6011	25.4453	25.5287	25.5348	25.5141	25.5168	25.4266	25.317	25.5219	25.561	25.4638	25.1569	25.693	25.5105	25.1952	25.5192	25.2809					+	+	+				halfMIC_Ctrl;MIC_Ctrl;quarterMIC_Ctrl	13	13	13	39	39	39	48.119	0	161.64
20.8175	19.7382	20.0292	18.6859	19.8797	19.6536	20.912	20.2684	19.7525	20.1828	20.443	21.8901	20.1412	21.334	20.5133	19.8255	19.0175	19.5569	19.26	20.9692	20.187	19.969	20.8135	19.0665	19.8616	19.642	19.0401	20.0467	19.6403	20.3795												2	2	2	5.3	5.3	5.3	50.48	0	4.6707
19.6771	18.1008	20.9526	20.5382	17.9838	17.8219	17.514	19.6674	17.576	17.8362	17.5322	17.5131	17.8175	19.7447	17.4312	17.6261	17.5202	17.566	20.7168	17.4811	18.3037	20.9312	18.328	17.9475	20.501	17.7969	17.9947	19.8542	17.6921	17.9362												2	2	2	6.1	6.1	6.1	63.773	0	4.859
23.8211	23.6524	23.3608	23.4284	23.2049	23.4785	23.108	23.1647	23.5735	23.3894	23.3253	23.038	23.1443	23.2103	22.7991	23.2442	23.11	20.9802	23.1847	23.1255	23.2254	23.123	22.8916	23.2417	23.0945	23.0518	23.0615	23.068	23.1584	23.0377					+	+	+				halfMIC_Ctrl;MIC_Ctrl;quarterMIC_Ctrl	4	4	4	55.1	55.1	55.1	11.496	0	27.722
28.1412	28.4938	28.1791	28.4829	28.6018	28.3297	28.5642	28.3679	28.5829	28.5247	28.6291	28.4935	28.7499	28.7455	28.7892	28.837	28.7477	28.813	28.7817	28.631	28.7055	28.7427	28.6718	28.8349	28.5178	28.7041	28.7367	28.6348	28.7118	28.6585					+	+	+				halfMIC_Ctrl;MIC_Ctrl;quarterMIC_Ctrl	24	24	24	76	76	76	44.042	0	323.31
27.4536	26.5654	27.1422	26.3718	25.8609	26.3469	25.788	20.1732	25.9947	25.7974	25.9153	25.3816	25.3806	25.4618	25.5821	25.7988	25.5076	25.6271	25.5643	25.5839	25.7118	25.68	25.2116	25.4336	25.8597	24.912	25.2558	25.9504	25.5233	25.5568					+	+	+				halfMIC_Ctrl;MIC_Ctrl;quarterMIC_Ctrl	3	3	3	54.1	54.1	54.1	6.7436	0	38.907
22.3907	22.1388	21.8235	22.0989	22.3978	22.3363	22.2822	22.2287	22.5376	22.5725	22.6268	22.2397	22.7165	22.512	22.5554	22.8098	22.5615	22.7102	22.6634	22.4391	22.377	23.0063	22.6445	22.8406	22.3337	22.3574	22.5969	22.2133	22.4559	22.5961						+	+				halfMIC_Ctrl;MIC_Ctrl	8	8	8	22.5	22.5	22.5	64.321	0	22.154
22.7207	22.9963	22.2793	23.1258	22.9834	22.8643	23.0957	22.7404	23.4558	23.1361	23.053	23.1988	23.2894	23.5383	23.1221	23.5048	23.3151	23.5385	23.2176	23.4144	23.1932	23.4008	23.748	23.4094	23.1617	23.1614	23.4903	23.351	23.3022	23.146					+	+	+				halfMIC_Ctrl;MIC_Ctrl;quarterMIC_Ctrl	4	4	4	13.7	13.7	13.7	39.553	0	9.9232
19.6681	20.6445	20.9152	20.5582	20.2512	20.7112	20.9349	20.6274	20.8158	20.7645	20.7171	20.9656	21.0048	20.0415	20.473	20.6797	20.4527	20.3709	20.8613	21.988	21.2412	21.477	21.2532	20.4304	20.8223	20.821	20.7576	19.2079	20.6557	20.5312							+				MIC_Ctrl	3	3	3	9.7	9.7	9.7	50.937	0	5.4723
22.0696	22.3938	22.0096	22.4202	22.6883	22.6774	22.7716	22.4633	22.7073	22.5326	22.6836	22.5108	22.9707	22.7919	22.8929	23.196	22.8765	23.0872	22.7743	22.7257	23.143	23.4908	23.0327	22.9682	22.5438	22.9413	22.749	22.6241	22.9681	22.4863					+	+	+				halfMIC_Ctrl;MIC_Ctrl;quarterMIC_Ctrl	4	4	4	24.8	24.8	24.8	33.505	0	21.27
25.3212	25.7484	25.8454	25.6279	25.8196	25.3936	25.3516	25.1668	25.5711	25.5067	25.5582	25.3914	25.5801	25.3499	25.0724	25.4784	25.3389	25.5976	25.522	25.3413	25.3005	25.3283	25.43	25.4304	25.2245	25.0891	25.5163	25.2717	25.6055	25.6385							+				MIC_Ctrl	9	9	9	50.6	50.6	50.6	17.514	0	89.958
23.8123	24.6126	24.241	24.3715	24.8065	24.5211	24.839	24.5003	24.7176	24.6186	24.6813	24.6304	24.8452	24.8714	24.8369	24.7647	24.84	24.9044	24.8466	24.6706	24.5424	24.7925	24.8586	24.7169	24.5999	24.9854	24.8482	24.6848	24.9645	24.7202					+	+	+				halfMIC_Ctrl;MIC_Ctrl;quarterMIC_Ctrl	9	9	9	36.8	36.8	36.8	39.337	0	113.54
23.194	23.4352	22.8701	23.1174	23.3913	23.2711	23.4411	23.2018	23.4399	23.3688	23.4799	23.3672	23.6094	23.5297	23.5643	23.7137	23.6756	23.719	23.6339	23.4643	23.8034	23.2418	23.927	23.9581	23.25	23.391	23.5148	23.4015	23.4988	23.2558						+	+				halfMIC_Ctrl;MIC_Ctrl	6	6	6	33.1	33.1	33.1	30.784	0	30.826
21.006	21.0028	20.4316	20.9545	19.0924	20.6573	19.9574	20.398	19.3381	19.5697	19.9253	20.2333	19.9631	20.8584	22.0852	20.0167	21.4076	21.4452	21.7117	20.4845	21.0726	19.7293	21.2087	19.8749	19.9489	21.2372	20.7902	19.3298	20.5872	20.0201												2	2	2	14.2	14.2	14.2	29.133	0	11.699
23.7139	23.814	23.8225	23.9456	23.6114	23.9475	23.9379	23.9816	24.1757	23.8531	24.0729	23.7368	24.0547	24.0617	24.0489	24.5412	24.1711	24.2091	24.1829	24.0239	23.93	23.9305	24.1854	24.2552	23.873	23.9531	24.0691	23.9716	23.9801	24.1758					+	+	+				halfMIC_Ctrl;MIC_Ctrl;quarterMIC_Ctrl	9	9	9	32.1	32.1	32.1	36.744	0	41.574
20.5454	21.5077	21.2535	19.7076	21.1411	20.7644	18.8917	20.3771	20.3529	19.7174	21.4768	18.4234	21.2446	21.4109	21.4454	21.5805	21.4434	21.7426	21.071	21.7223	21.9445	21.3904	21.2625	22.2262	21.2002	21.489	20.7103	20.344	21.6259	21.3248						+	+				halfMIC_Ctrl;MIC_Ctrl	5	5	5	20.9	20.9	20.9	42.695	0	17.422
23.3191	23.2181	22.9239	23.3676	23.6192	22.7945	22.518	22.9929	23.1442	22.9944	22.5007	23.1887	23.433	23.4144	23.1569	23.2074	23.2833	23.4076	23.2686	22.6286	22.5205	23.1317	23.4324	23.0241	23.1433	23.4687	23.3793	23.1407	23.2998	23.1672												4	4	4	9.2	9.2	9.2	75.242	0	19.746
23.6168	23.9354	23.7349	23.9895	24.158	23.7437	23.9314	24.1731	24.0541	23.9681	23.9268	24.1211	24.1497	23.9695	23.9903	23.5052	23.9776	23.7541	24.2168	24.2801	24.5248	23.9885	23.9906	23.9826	24.1608	24.3319	23.9684	24.0223	24.1318	24.025					+		+				MIC_Ctrl;quarterMIC_Ctrl	10	10	10	35.6	35.6	35.6	43.309	0	22.095
24.8386	25.0172	24.8091	25.1824	25.4612	25.1163	25.3721	25.0906	25.3195	25.2176	25.367	25.2233	25.5307	25.5377	25.5407	25.5859	25.5627	25.6138	25.4518	25.4337	25.3214	25.5836	25.4266	25.5703	25.1171	25.4611	25.4832	25.2686	25.5569	25.3199					+	+	+				halfMIC_Ctrl;MIC_Ctrl;quarterMIC_Ctrl	22	22	22	45.8	45.8	45.8	62.603	0	100.6
21.8513	21.8897	22.2759	22.2179	22.3406	22.1246	21.71	21.5764	22.2261	21.9732	21.9121	21.9637	22.0117	22.332	21.7951	21.7851	22.1269	22.1586	22.0143	21.8443	22.287	21.9267	22.1276	21.6474	22.1281	21.9746	22.1987	21.9953	22.2275	22.1325												7	7	7	28.9	28.9	28.9	35.578	0	16.359
25.4563	25.6623	25.4227	25.714	25.9202	25.7012	25.8627	25.6048	25.8214	25.8252	25.9728	25.7556	25.9002	25.9383	26.06	26.0703	25.8665	26.0083	25.9846	25.8561	25.9897	26.1123	26.0693	26.0734	25.6594	26.0177	25.9404	25.7544	25.8473	25.8452						+	+				halfMIC_Ctrl;MIC_Ctrl	19	19	19	52.2	52.2	52.2	48.371	0	104.86
28.3624	27.8723	28.6088	27.8599	27.3761	27.7761	27.6647	27.9325	27.4505	27.5975	27.4452	27.6794	27.0329	27.2814	26.8883	27.1601	27.0328	26.9092	26.7277	26.9035	26.8982	26.0043	26.1026	26.3042	28.0716	27.0818	27.2454	27.6946	27.1638	27.4783						+	+				halfMIC_Ctrl;MIC_Ctrl	13	13	13	61.7	61.7	61.7	10.315	0	87.316
24.3661	24.5619	24.4273	24.2512	24.6381	24.663	24.6883	24.5445	24.7425	24.5724	24.6224	24.5344	24.7567	24.7587	24.8066	24.8217	24.7782	25.0212	24.957	24.7086	24.6438	25.098	25.183	24.8012	24.2545	24.7714	24.7684	24.6031	24.9109	24.6736						+	+				halfMIC_Ctrl;MIC_Ctrl	9	9	9	45.4	45.4	45.4	31.789	0	87.073
19.9366	21.5324	21.0746	21.4753	21.8037	21.5936	21.9333	21.5114	21.6527	21.7605	21.8095	21.7659	21.8413	21.737	21.8878	22.1087	21.9312	21.9453	21.8532	21.6699	22.0004	22.0131	22.2536	22.1558	21.566	21.8755	22.1796	21.9408	22.0365	21.6198						+	+				halfMIC_Ctrl;MIC_Ctrl	5	5	5	20.1	20.1	20.1	34.812	0	25.212
22.9211	23.2329	23.0373	23.2439	23.2412	22.7581	23.3145	23.2069	23.2673	23.264	23.0899	23.2352	23.3772	23.3872	23.5434	23.4594	23.3269	23.4232	22.9724	23.3504	23.3913	23.5628	23.7315	23.2084	23.1848	23.5063	23.5283	23.2148	23.4615	23.2501					+	+	+				halfMIC_Ctrl;MIC_Ctrl;quarterMIC_Ctrl	10	10	10	30.2	30.2	30.2	49.266	0	70.063
23.5427	23.8123	23.7432	23.9687	24.0926	23.8469	23.9971	23.7509	24.056	24.0204	24.2595	24.0024	24.3624	24.3252	23.8603	24.3923	24.2241	24.3712	24.2066	24.1717	24.4572	23.8917	24.12	24.2203	23.7691	23.9271	24.2843	24.1942	24.068	24.2055						+	+				halfMIC_Ctrl;MIC_Ctrl	4	4	4	19.8	19.8	19.8	35.096	0	20.787
24.6998	24.7973	24.7419	24.7966	24.7902	24.7512	24.6727	24.5326	24.7464	24.8422	24.6955	24.4738	24.4466	24.524	24.7181	24.9414	24.6913	24.7254	24.7041	24.6528	24.7237	24.81	24.6649	24.8176	24.6385	24.5873	24.6219	24.8391	24.5975	24.7594												26	26	26	30.5	30.5	30.5	144.65	0	179.63
24.4394	24.8381	24.7064	24.7698	24.8557	24.5882	24.7943	24.8096	24.9901	24.7628	24.8267	24.792	24.9961	24.8742	24.9594	24.9734	24.8272	24.9397	24.8605	25.0177	24.9936	24.9029	24.9748	24.9672	24.6035	24.8873	24.9663	24.8159	24.8091	24.8452						+	+				halfMIC_Ctrl;MIC_Ctrl	16	16	16	53.9	53.9	53.9	44.893	0	128.39
20.7761	20.6954	20.9196	20.7352	19.309	20.5681	20.4189	20.3276	19.8758	20.475	18.8341	19.0085	19.4624	20.7883	20.6355	20.3557	20.3936	20.5968	20.582	20.6389	18.1991	20.5044	20.5821	19.1537	20.1922	19.544	20.5395	20.7717	20.6866	20.3512												4	4	4	13.7	13.7	13.7	41.471	0	7.427
22.13	22.2657	22.0653	21.8549	21.7439	21.9572	21.7772	22.0173	21.7355	21.9748	21.7549	21.7896	21.6883	21.7028	21.845	21.7993	21.6745	21.7858	21.4938	21.8503	21.8438	21.9756	21.6823	22.067	21.7087	21.7878	21.8199	21.7379	21.4779	21.9258					+	+					halfMIC_Ctrl;quarterMIC_Ctrl	8	8	8	21.9	21.9	21.9	50.211	0	6.5605
23.1261	23.6899	23.1502	23.546	23.6097	23.4429	23.2552	22.488	23.2956	23.2583	23.2208	23.3284	23.5541	23.6479	23.5471	23.6636	23.6319	23.4922	23.7995	23.6448	23.4485	23.785	23.7654	23.7486	23.2569	23.5456	23.3332	23.2423	23.4296	23.4219							+				MIC_Ctrl	7	7	7	53.6	53.6	53.6	15.945	0	50.871
23.6046	23.3625	24.4065	23.7538	23.4064	23.3177	23.9796	24.4468	23.7562	23.9148	23.5825	24.8218	23.3178	23.3695	22.9412	22.6645	23.1044	22.7679	23.0599	23.6117	23.6612	23.5899	22.9957	23.7164	23.6982	23.5671	23.4344	23.9684	23.3058	23.3363						+					halfMIC_Ctrl	8	8	8	21.9	21.9	21.9	35.637	0	106.15
23.1307	23.5751	23.3617	23.4435	23.7279	22.9671	23.5888	23.4569	23.5246	23.6864	23.6571	23.5476	23.8718	23.6877	23.8723	23.7395	23.8566	23.8334	23.7726	23.8036	23.6952	23.9255	23.5975	24.0428	23.4686	23.728	23.7844	23.7067	23.9774	23.5361					+	+	+				halfMIC_Ctrl;MIC_Ctrl;quarterMIC_Ctrl	10	10	10	45.4	45.4	45.4	36.736	0	70.425
19.7234	20.7248	19.5271	20.3751	20.5886	20.602	20.184	20.5985	20.8379	20.7479	20.9918	20.6357	20.935	20.9991	18.7087	20.8849	19.9519	21.0785	20.8065	20.9554	20.1767	21.1968	20.7209	20.4523	20.0874	20.8657	20.7036	20.4091	20.0168	20.7448												2	2	2	11.7	11.7	11.7	25.596	0	5.8046
22.0237	22.6992	22.5764	22.8547	23.0337	22.55	22.8572	22.7601	23.1542	22.9493	22.9442	22.6909	23.1503	23.086	23.3231	23.3864	23.1845	23.3799	23.2614	22.9361	22.9271	23.697	23.3998	23.5575	22.8364	23.0664	23.2847	23.0418	23.1696	22.9528					+	+	+				halfMIC_Ctrl;MIC_Ctrl;quarterMIC_Ctrl	10	10	10	35.8	35.8	35.8	45.847	0	15.659
23.845	23.7364	23.7771	23.8405	23.8645	23.4511	24.0803	23.6258	23.8812	23.9415	24.0665	23.8808	23.8068	23.8199	23.9044	24.165	23.8243	24.1288	23.9548	23.7547	23.9736	23.9589	23.8146	24.0575	23.705	23.7273	23.8632	23.92	23.7794	23.8956						+	+				halfMIC_Ctrl;MIC_Ctrl	7	7	7	41.1	41.1	41.1	23.592	0	62.779
25.2765	25.5074	25.1147	25.4605	25.5475	25.343	25.5256	25.3277	25.5946	25.5729	25.6189	25.4434	25.5568	25.6893	25.7178	25.7865	25.6789	25.7077	25.6496	25.6812	25.7811	25.7275	25.7765	25.8204	25.4687	25.78	25.6867	25.6132	25.7181	25.636					+	+	+				halfMIC_Ctrl;MIC_Ctrl;quarterMIC_Ctrl	24	24	24	49.6	49.6	49.6	68.174	0	174.2
25.9171	25.8837	26.0109	26.3232	26.2489	26.0335	26.2508	26.3047	26.2732	26.1255	26.1334	26.1534	26.2617	26.1714	26.3293	26.366	26.1199	26.2869	26.2052	26.1519	26.1778	26.4303	26.2828	26.2974	26.3808	26.4423	26.1295	26.3359	26.3709	26.1521					+	+	+				halfMIC_Ctrl;MIC_Ctrl;quarterMIC_Ctrl	17	17	17	49.5	49.5	49.5	41.777	0	165.95
25.9736	26.2297	25.9833	26.1457	26.3523	26.2062	26.2815	26.0869	26.3897	26.3099	26.3244	26.255	26.3593	26.3181	26.355	26.4233	26.3724	26.3973	26.348	26.3837	26.4572	26.5365	26.4538	26.4418	26.168	26.4853	26.4495	26.3135	26.4179	26.389					+	+	+				halfMIC_Ctrl;MIC_Ctrl;quarterMIC_Ctrl	34	34	34	47.1	47.1	47.1	95.959	0	323.31
23.0572	21.911	22.7295	21.7186	22.0526	21.8455	22.037	21.6306	21.9462	19.809	21.9947	21.668	21.5218	21.9941	22.2627	21.7947	22.4032	22.5867	22.11	21.8892	21.3522	22.2632	22.1951	21.896	21.4619	21.8847	22.0053	21.971	22.1451	22.2624												5	5	5	36.5	36.5	36.5	12.284	0	13.042
28.8617	28.9675	29.0531	29.0104	28.995	28.8768	28.8551	28.8283	28.8986	28.9868	28.8845	28.9181	28.9751	29.0261	28.9215	28.9416	28.9675	28.9589	28.8679	28.9796	29.018	28.766	28.8287	28.9938	28.9048	29.0272	28.9216	28.987	28.9	29.0006												38	38	38	81.8	81.8	81.8	52.85	0	323.31
24.1924	24.88	24.2545	24.8042	24.8933	24.4324	24.9477	24.6663	24.9433	24.9155	24.6917	24.7416	25.0211	24.9693	25.2048	25.1527	25.0736	25.1962	25.1568	24.946	24.9909	25.399	25.2823	25.1872	24.5897	25.2131	25.1954	24.8101	25.1462	24.9097					+	+	+				halfMIC_Ctrl;MIC_Ctrl;quarterMIC_Ctrl	9	9	9	48.8	48.8	48.8	35.077	0	87.867
25.9863	26.3178	26.2413	26.3197	26.3973	26.2483	26.3663	26.2829	26.3835	26.2794	26.3983	26.4578	26.5866	26.4882	26.3902	26.4236	26.5243	26.5325	26.535	26.6046	26.5706	26.6569	26.5874	26.6967	26.3716	26.6647	26.485	26.408	26.5159	26.3974					+	+	+				halfMIC_Ctrl;MIC_Ctrl;quarterMIC_Ctrl	23	23	23	67.9	67.9	67.9	41.913	0	279.52
26.5121	26.6755	26.5373	26.6701	26.5458	26.5476	26.4155	26.2699	26.6234	26.4412	26.6852	26.2718	26.6047	26.4734	26.7462	26.7213	26.6249	26.7013	26.7398	26.7107	26.7457	26.8598	26.8174	26.955	26.3658	26.5449	26.6746	26.5219	26.5879	26.5326							+				MIC_Ctrl	20	20	20	53.5	53.5	53.5	43.741	0	282.47
20.3935	20.5285	20.898	20.8774	20.8813	20.4974	19.9588	20.131	20.7218	20.6117	20.6994	20.316	20.751	20.6653	20.6727	20.4332	20.4797	20.5272	20.6158	20.8553	20.7455	20.7377	20.4493	20.7604	19.9703	21.114	20.6907	20.7333	20.6087	20.6392												3	3	3	11.1	11.1	11.1	48.415	0	5.5069
24.9648	24.9372	25.025	24.9918	25.0052	24.7905	24.7661	24.7124	24.8784	25.0197	24.9103	24.8578	24.7445	24.8201	24.8569	24.9271	24.7416	24.81	24.851	24.7303	24.7483	24.7197	24.9274	24.7432	24.816	24.7472	25.0126	24.886	24.8249	24.7882						+	+				halfMIC_Ctrl;MIC_Ctrl	19	19	19	47.9	47.9	47.9	45.802	0	66.627
21.2704	21.722	20.2536	20.7318	21.2129	21.1018	20.019	18.939	19.6853	21.2286	21.1641	20.9116	21.0887	20.4757	21.2725	21.2077	21.1829	21.2248	21.2388	21.0675	21.0709	21.2269	21.353	21.2189	20.4634	20.6405	21.2201	21.1879	21.5081	21.1874												4	4	4	14.7	14.7	14.7	37.869	0	6.4681
22.0778	19.2822	19.2667	21.7664	21.7939	19.8228	19.7156	18.5931	19.4435	19.3096	18.9803	21.2537	20.0573	20.5926	19.3999	20.381	20.5005	19.682	19.7279	20.0984	20.9643	20.3302	19.4061	20.2028	20.0339	21.407	19.6761	19.9509	20.5849	18.963												2	2	2	30.8	30.8	30.8	9.3443	0.0085543	1.5161
23.2991	23.3195	23.2353	23.4089	23.3126	23.2252	23.2306	23.0325	23.2385	23.409	23.1698	23.1386	23.1624	23.3941	23.2774	23.4941	23.1578	23.265	23.3798	23.499	23.2541	23.5235	23.4641	23.5106	23.0219	23.1629	23.3557	23.2704	23.3242	23.4427							+				MIC_Ctrl	9	9	9	34.1	34.1	34.1	34.354	0	73.354
26.3263	26.5624	26.3012	26.576	26.6843	26.4677	26.6415	26.4964	26.6136	26.6024	26.7605	26.5246	26.911	26.9375	26.9142	26.997	26.8413	26.9882	26.8677	26.7902	26.7433	26.9201	26.8972	26.9324	26.5397	26.9189	26.864	26.7265	26.7771	26.7628					+	+	+				halfMIC_Ctrl;MIC_Ctrl;quarterMIC_Ctrl	12	12	12	41.1	41.1	41.1	34.068	0	162.24
23.7468	23.4441	24.3566	23.1865	23.2062	23.1051	23.0915	23.1089	23.1916	23.2748	23.009	23.3625	22.983	22.9876	22.8362	22.978	22.9429	23.0415	22.7845	23.0144	22.9532	22.7224	22.9525	22.5189	23.2263	23.0489	23.0776	23.2244	22.9615	23.1597						+	+				halfMIC_Ctrl;MIC_Ctrl	10	10	10	26.8	26.8	26.8	40.059	0	57.043
28.063	28.4763	28.3193	28.4455	28.4969	28.3448	28.5114	28.3146	28.4816	28.5149	28.5797	28.489	28.5772	28.5847	28.5708	28.5266	28.586	28.5743	28.6271	28.5402	28.3892	28.5111	28.5452	28.673	28.3765	28.6309	28.7126	28.4584	28.6376	28.516					+	+	+				halfMIC_Ctrl;MIC_Ctrl;quarterMIC_Ctrl	20	20	20	54	54	54	42.601	0	289.25
25.2748	25.4009	25.3031	25.5343	25.6833	25.4079	25.5156	25.3971	25.6978	25.6025	25.6564	25.5004	25.7196	25.7219	25.6649	25.883	25.7204	25.7541	25.7316	25.7395	25.7863	25.8785	25.7649	25.8034	25.5827	25.7502	25.6655	25.571	25.7158	25.705					+	+	+				halfMIC_Ctrl;MIC_Ctrl;quarterMIC_Ctrl	21	21	21	35.7	35.7	35.7	99.35	0	188.99
26.4177	26.5363	26.3424	26.6033	26.7389	26.4599	26.2426	26.246	26.4475	26.5027	26.5172	26.386	26.5246	26.5674	26.5029	26.6446	26.5381	26.5938	26.8359	26.5995	26.626	26.679	26.7502	26.7932	26.3564	26.682	26.5904	26.5956	26.4657	26.548							+				MIC_Ctrl	12	12	12	72.2	72.2	72.2	23.05	0	190.84
24.9341	24.2272	24.7933	24.1835	23.8212	22.989	23.2981	23.5825	23.3899	24.0002	23.3861	24.1275	22.9728	23.6449	23.4697	23.046	23.6812	22.8581	23.0833	22.8236	22.9073	23.7487	22.2797	20.8207	23.3471	23.1491	22.9231	23.5951	23.1406	23.2959					+	+	+				halfMIC_Ctrl;MIC_Ctrl;quarterMIC_Ctrl	3	3	3	49.4	49.4	49.4	9.1373	0	19.334
19.9933	19.8534	20.1296	20.063	20.1062	20.1243	20.0196	19.9795	20.2743	20.207	20.1801	20.2678	20.5111	20.0962	19.959	19.9905	20.2163	20.0996	20.228	20.1682	20.3778	21.5137	20.0676	19.5476	20.0765	20.2923	20.2154	20.8524	20.4262	20.2162					+						quarterMIC_Ctrl	2	2	2	15.3	15.3	15.3	19.992	0	6.7111
23.4055	23.1691	23.4117	23.3581	23.2523	23.1337	23.3147	22.9001	23.406	22.9955	23.2164	22.9105	23.1629	23.1491	23.0586	23.1698	23.1376	23.0049	23.1572	22.9197	23.0058	23.2066	23.2531	23.1377	23.0528	22.9092	23.0513	23.0595	23.1152	23.1286					+	+	+				halfMIC_Ctrl;MIC_Ctrl;quarterMIC_Ctrl	4	4	4	54.6	54.6	54.6	11.035	0	17.859
21.9754	22.0202	21.9443	21.8917	21.9862	21.9797	20.7345	21.5788	22.1216	22.099	21.754	21.4808	21.9483	21.8513	22.0267	22.3327	22.0207	21.6936	22.2807	21.8499	21.7042	22.3589	22.08	22.0564	21.6843	21.6761	21.8602	22.0263	21.8768	22.004												7	7	7	19.8	19.8	19.8	59.186	0	17.923
23.4952	22.8948	25.1408	23.9264	23.5142	22.337	23.1466	22.9933	23.4708	22.5957	22.7519	19.5312	22.6948	22.9233	23.1379	22.9622	22.911	22.7986	23.218	23.503	23.6186	23.4799	19.3525	23.3049	22.5539	22.8445	22.71	23.4772	23.141	22.046												4	4	4	35.7	35.7	35.7	18.594	0	23.099
27.8366	28.1039	28.0973	27.9592	27.8818	27.7509	27.6822	27.6791	27.8175	27.87	27.8459	27.9984	27.7889	27.8037	27.8109	27.8472	27.7796	27.7596	27.6374	27.8416	27.8254	28.0037	27.946	27.9562	27.7728	27.8116	27.8881	27.8686	27.7742	27.9522						+					halfMIC_Ctrl	19	19	19	81.8	81.8	81.8	27.291	0	323.31
28.0209	27.3697	28.0679	27.7768	27.5915	27.5129	27.1253	27.4748	27.6301	27.7439	27.5033	27.4841	27.1972	27.1965	26.9556	27.1372	27.1533	27.0564	27.1432	27.2721	27.417	26.5225	26.7299	26.9829	27.5278	27.1697	27.3285	27.4907	27.3322	27.5359					+	+	+				halfMIC_Ctrl;MIC_Ctrl;quarterMIC_Ctrl	21	21	21	73.6	73.6	73.6	13.719	0	62.852
24.121	24.425	24.108	24.4267	24.2382	24.214	24.4039	24.3584	24.3103	24.2629	24.3475	24.4775	24.4017	24.4959	24.5506	24.4174	24.4091	24.4712	24.6343	24.1844	24.1937	24.6276	24.5221	24.266	24.2554	24.4412	24.4172	24.4427	24.4447	24.3571						+					halfMIC_Ctrl	12	12	12	54.3	54.3	54.3	29.875	0	25.292
28.3319	28.3979	28.3254	28.477	28.536	28.4387	28.4355	28.4019	28.5739	28.4877	28.5577	28.4688	28.5222	28.5156	28.5007	28.5511	28.5006	28.5531	28.4309	28.3675	28.4235	28.4324	28.3699	28.4782	28.436	28.5473	28.5192	28.5021	28.5437	28.525					+	+				+	halfMIC_Ctrl;MIC_halfMIC;quarterMIC_Ctrl	31	31	31	55.8	55.8	55.8	62.387	0	323.31
19.6687	19.8206	19.5595	19.4549	21.4292	21.1912	21.1544	21.2292	21.2286	21.1223	20.4487	19.9692	21.1607	21.3952	20.8972	21.7354	21.2771	21.6616	21.1879	21.2581	21.2092	21.3536	21.4009	21.3447	20.7442	21.6127	21.1586	20.9516	21.1093	21.1802					+	+	+				halfMIC_Ctrl;MIC_Ctrl;quarterMIC_Ctrl	6	6	6	11.8	11.8	11.8	76.854	0.0017937	2.2746
24.9016	25.0048	24.685	25.054	25.1651	24.9707	25.2634	24.8873	25.2336	25.0698	25.2467	24.9725	25.3075	25.3547	25.4275	25.3734	25.4027	25.5003	25.4541	25.1761	25.3682	25.7165	25.4464	25.4974	25.1089	25.2993	25.2586	25.1108	25.2642	25.1836					+	+	+				halfMIC_Ctrl;MIC_Ctrl;quarterMIC_Ctrl	16	16	16	61.2	61.2	61.2	40.457	0	175.32
26.1209	26.3757	26.0376	26.311	26.3903	26.2723	26.3508	26.2263	26.3812	26.4402	26.4652	26.2991	26.294	26.5406	26.4295	26.5336	26.5036	26.4957	26.4217	26.3857	26.4777	26.2703	26.3269	26.2877	26.2844	26.4996	26.4173	26.4663	26.4074	26.3941					+	+					halfMIC_Ctrl;quarterMIC_Ctrl	17	17	17	76.3	76.3	76.3	33.113	0	211.51
21.6397	22.1386	21.7076	21.6767	21.6855	21.6376	21.8089	21.8453	22.0358	21.7737	22.2091	21.8182	22.1241	22.2478	21.9064	22.2076	22.059	22.1032	21.9947	19.7204	22.0763	22.1238	22.0183	22.2015	20.1032	21.893	21.7759	21.8933	21.8243	21.9886						+					halfMIC_Ctrl	5	5	5	30.4	30.4	30.4	22.344	0	21.129
21.9335	22.1802	22.1778	22.3604	22.8417	22.43	22.0754	21.9857	21.9307	19.6138	22.1098	22.167	21.8466	22.1204	22.6439	22.5322	22.1227	22.3711	22.1637	21.9626	22.1527	22.3051	22.2759	22.301	22.2899	22.3625	22.5227	22.2451	22.143	22.1377												9	9	9	18.8	18.8	18.8	68.64	0	14.108
26.8806	27.1546	26.8824	27.2036	27.2825	27.0445	27.198	27.0664	27.235	27.2862	27.3109	27.1032	27.3648	27.3572	27.4492	27.5162	27.3748	27.5338	27.4591	27.3294	27.4085	27.5186	27.431	27.4958	27.2188	27.3782	27.435	27.258	27.3514	27.3287					+	+	+				halfMIC_Ctrl;MIC_Ctrl;quarterMIC_Ctrl	35	35	35	55.5	55.5	55.5	74.487	0	323.31
25.5942	25.8688	25.5844	25.847	25.8692	25.6659	25.8922	25.7105	25.9273	25.8708	25.9342	25.7432	26.0156	25.8995	25.9499	26.1203	26.0186	26.0924	26.0436	25.8826	25.8929	26.1921	26.0366	26.0499	25.7745	25.9644	26.0681	25.8391	26.0096	25.9433					+	+	+				halfMIC_Ctrl;MIC_Ctrl;quarterMIC_Ctrl	17	17	17	55.6	55.6	55.6	43.417	0	105.2
21.6774	21.1467	21.1615	19.8082	21.1947	21.3612	21.4595	21.2507	21.693	21.4674	21.5188	21.4944	21.596	21.8063	21.5353	21.7434	21.7502	21.633	21.2964	21.7099	21.6934	21.3364	21.6573	21.344	21.3174	21.7323	21.7257	21.5584	21.8364	21.8617						+					halfMIC_Ctrl	8	8	8	25.8	25.8	25.8	42.795	0	14.279
20.2922	22.1052	20.5366	21.8973	21.7823	22.0127	22.2442	21.9834	22.2215	22.2019	22.1907	21.2253	21.9028	22.153	21.9799	22.09	22.1356	22.0414	22.0207	20.3243	21.9955	22.4426	20.6435	22.3767	20.6892	22.1074	22.0764	22.0282	22.1416	22.1869												6	6	6	28.8	28.8	28.8	38.887	0	56.803
23.1837	22.9306	23.0659	23.5876	23.3651	23.0697	22.8302	22.445	20.3027	22.8207	22.798	23.5937	23.2377	23.1406	23.2517	23.2079	23.0999	23.1609	23.56	23.2463	23.3367	23.4364	23.3134	23.6186	23.2912	23.1948	23.0955	23.2046	22.8824	23.0591												3	3	3	34.7	34.7	34.7	18.539	0	49.872
24.1264	23.1156	23.7775	22.7282	22.3907	22.9441	22.3309	23.5473	22.0148	20.863	22.9162	23.0042	19.9306	20.5279	20.6754	20.5726	20.2536	19.9084	19.6239	20.0133	20.5562	21.505	20.438	20.0808	22.0411	21.9219	21.6048	22.8563	21.3609	20.766					+	+	+				halfMIC_Ctrl;MIC_Ctrl;quarterMIC_Ctrl	4	4	4	27.3	27.3	27.3	24.066	0	25.107
27.7019	28.1589	27.9021	28.254	28.3016	28.1569	28.2598	28.0963	28.3359	28.2243	28.3861	28.1518	28.4355	28.5133	28.4812	28.5418	28.5028	28.5732	28.3664	28.2977	28.393	28.4601	28.4937	28.5642	28.2222	28.4986	28.4126	28.367	28.4325	28.4463					+	+	+				halfMIC_Ctrl;MIC_Ctrl;quarterMIC_Ctrl	29	29	29	62.2	62.2	62.2	58.23	0	323.31
24.4164	24.4058	24.487	24.4693	24.5452	24.4404	24.3344	24.3172	24.3035	24.5663	24.4549	24.3462	24.6196	24.3921	24.6527	24.7167	24.6541	24.6664	24.6805	24.5101	24.466	24.6308	24.689	24.6304	24.315	24.5499	24.5041	24.4998	24.5436	24.3713						+	+				halfMIC_Ctrl;MIC_Ctrl	24	24	24	31.4	31.4	31.4	111.24	0	106.47
25.6933	26.0861	25.8353	26.1227	26.206	26.1025	26.1871	25.963	26.1985	26.1782	26.3167	26.0879	26.3037	26.2147	26.392	26.4111	26.3151	26.4439	26.3012	26.2497	26.2319	26.4452	26.4201	26.636	26.069	26.3477	26.3111	26.2189	26.3264	26.3493					+	+	+				halfMIC_Ctrl;MIC_Ctrl;quarterMIC_Ctrl	9	9	9	46.6	46.6	46.6	33.879	0	205.18
22.3537	21.5837	22.1079	21.8965	22.0576	21.6691	21.6474	21.5314	21.8599	21.6934	22.0847	21.4301	21.3671	21.4623	21.6038	22.0443	21.5353	21.6137	21.9208	21.8201	21.9227	21.9174	21.8045	21.7119	21.8124	21.5349	21.583	21.6386	21.5406	21.8927						+					halfMIC_Ctrl	8	8	8	21.3	21.3	21.3	53.219	0	10.261
22.8688	22.7417	22.43	22.7346	22.1211	23.0671	22.5126	22.4477	22.6261	22.4051	22.281	22.3225	22.3317	22.3315	22.5965	22.7283	22.4193	22.6181	22.4626	22.2804	22.5193	22.7233	22.6403	22.3172	22.5585	22.4385	22.5405	22.459	22.341	22.4324												7	7	7	30	30	30	36.97	0	146.36
23.2238	23.06	23.1908	23.1797	23.4515	23.0368	22.7982	22.7877	23.1287	23.3225	22.7582	23.2319	23.2411	23.1315	23.016	23.1405	23.419	23.2904	23.3135	23.1961	23.1454	23.2843	23.6496	23.0447	23.1164	23.2069	23.1288	22.8129	23.1407	23.3362												9	9	9	40.7	40.7	40.7	33.797	0	59.421
24.4293	22.838	23.7559	22.8202	20.0306	26.2925	24.0344	20.0203	19.5402	19.1832	23.1694	22.9032	24.2125	23.7877	20.3701	23.5844	25.1266	24.2073	25.5845	19.3219	24.1334	24.242	20.0729	20.16	23.9554	24.0865	23.029	20.4841	22.9302	23.4843												5	5	5	11.9	11.9	11.9	58.254	0.0035367	2.0873
23.4962	23.4967	23.4701	23.7564	23.6373	23.4864	23.7106	23.5822	23.7311	23.5828	23.633	23.606	23.8134	23.7694	23.6408	23.8671	23.7956	23.9995	23.938	23.5888	23.8402	23.9344	23.9078	23.9611	23.5086	23.8669	23.7609	23.5248	23.7804	23.7612						+	+				halfMIC_Ctrl;MIC_Ctrl	9	9	9	26.6	26.6	26.6	60.538	0	120.74
24.3421	24.7302	24.4454	24.6313	24.6909	24.5811	24.4721	24.5479	24.816	24.7703	24.8228	24.8122	24.7029	24.6409	24.6167	24.8421	24.6952	24.758	24.788	24.7015	24.7112	24.7772	24.6202	24.748	24.5035	24.7786	24.7954	24.5115	24.7977	24.778						+	+				halfMIC_Ctrl;MIC_Ctrl	10	10	10	42.7	42.7	42.7	31.822	0	268.44
20.8094	21.161	21.0638	21.8916	21.8403	21.6403	21.7242	21.5102	21.9439	21.6262	21.7659	21.6334	21.7628	21.8967	22.0077	21.7293	21.602	21.7393	21.6728	21.2283	21.5408	22.0028	21.9119	21.9827	21.4045	21.9212	21.916	21.5723	21.9926	21.6231						+					halfMIC_Ctrl	5	5	5	28.6	28.6	28.6	23.8	0	31.765
22.2293	22.4995	22.2928	21.1267	22.4627	22.5615	22.4837	22.781	22.4464	22.6555	22.6981	22.2645	22.7064	22.6765	22.628	22.7528	22.6058	22.8165	22.7463	22.7241	22.7179	22.6911	22.4347	22.825	22.3697	22.5358	23.1424	20.0175	22.2988	22.374						+	+				halfMIC_Ctrl;MIC_Ctrl	7	7	7	29.1	29.1	29.1	35.635	0	18.295
19.5167	21.6962	21.5824	19.0463	21.9483	21.3503	21.7698	21.5389	21.5709	21.7155	21.7832	21.4767	21.2996	21.176	20.8639	21.6768	21.5714	21.5297	21.4111	21.4731	21.4332	22.3814	21.3354	21.9611	21.3684	21.3587	21.7609	19.1355	21.5288	21.4965												4	4	4	27.2	27.2	27.2	27.241	0	34.897
21.9647	22.0274	19.7153	21.7795	21.8099	22.0186	21.8697	22.029	22.0367	22.4382	22.3448	22.1054	22.4603	22.2377	22.253	22.5023	22.5264	22.3857	22.8466	22.3241	22.3497	20.4077	22.3419	20.3526	19.4802	22.5327	22.4934	22.2999	22.5684	22.3509						+					halfMIC_Ctrl	4	4	4	25.6	25.6	25.6	20.083	0	6.7777
23.4459	23.8154	23.5211	23.6258	23.5363	23.8579	23.8532	23.4812	23.8617	23.8328	24.0068	23.6903	23.7041	23.7825	23.9585	24.01	23.8009	24.0555	23.8037	23.6433	23.6899	24.2751	23.7905	23.9391	23.6047	24.0195	23.8387	23.7258	23.8789	23.7175						+					halfMIC_Ctrl	8	8	8	42.2	42.2	42.2	34.913	0	68.593
25.8759	25.9504	28.01	26.0054	25.9761	26.1535	27.3892	26.7281	26.464	27.1436	26.3234	27.5429	26.5802	26.8741	26.2707	25.7176	26.2715	25.9385	26.2331	26.5925	26.5379	26.6527	25.6018	26.336	27.1498	26.631	26.311	27.6141	26.3851	26.3025												7	7	7	36.4	36.4	36.4	13.686	0	44.158
22.8532	23.3337	23.2473	23.4081	23.5853	23.2681	23.4554	23.4154	23.4002	23.5693	23.3339	23.4735	23.7084	23.7727	23.4979	23.9547	23.6922	23.728	23.5148	23.3491	23.591	24.0264	23.9437	23.6877	23.6336	23.7129	23.6532	23.745	23.6709	23.5366					+	+	+	+			halfMIC_Ctrl;MIC_Ctrl;quarterMIC_Ctrl;quarterMIC_eighthMIC	11	11	11	37	37	37	50.114	0	60.583
26.1344	26.2552	26.0381	26.2663	26.2164	26.1843	26.1223	25.7049	26.1311	26.144	26.2583	25.9347	26.2162	26.2062	26.2211	26.2286	26.2401	26.3256	26.2122	26.2845	26.1895	25.6884	26.3207	26.2238	26.0554	26.0574	26.2797	26.2286	26.1349	26.1589												9	9	9	64	64	64	21.619	0	152.45
27.8662	27.4343	28.1981	27.8689	27.7465	27.6736	27.7938	27.9114	28.1244	28.1227	28.1806	27.7948	27.5167	27.8573	27.4115	27.7312	27.8631	27.9743	28.1217	27.148	27.6296	27.0412	27.6472	27.5785	27.6547	27.7178	27.8124	27.9788	27.727	28.1537												14	14	14	67.6	67.6	67.6	11.536	0	54.148
23.8411	23.528	23.3073	23.4224	23.3732	20.6304	24.0685	23.4958	23.576	23.7813	23.6176	24.0312	23.9625	23.9442	24.0122	23.906	23.6853	23.7747	23.8487	23.8738	23.686	24.3476	23.7726	23.7471	23.7687	23.5431	23.5636	23.585	23.8583	23.5761												10	10	10	46.6	46.6	46.6	39.399	0	89.848
22.1566	20.5573	20.8907	20.6536	20.5112	20.8032	20.8259	19.1354	21.3566	19.9959	20.3753	20.2789	20.2512	20.0349	20.7773	20.1873	19.839	19.6853	19.7892	20.206	20.5146	20.0731	19.4825	20.2631	19.5005	20.0873	19.7579	20.3305	21.423	20.1389						+	+				halfMIC_Ctrl;MIC_Ctrl	3	3	3	65.6	65.6	65.6	7.1001	0.0018232	2.5098
21.7216	21.791	21.5756	21.939	22.1082	19.3284	22.2197	21.7115	22.041	22.0625	22.157	22.1562	22.2271	22.4797	21.7864	22.3136	22.4141	22.0753	21.3086	22.198	22.3316	22.5999	21.8602	22.3484	22.0639	22.244	22.3883	21.8343	22.1675	22.0301												4	4	4	24	24	24	20.749	0	8.443
19.322	22.0853	19.9368	21.9729	22.5251	22.1912	22.0316	22.115	22.3986	22.087	22.1997	22.2095	22.718	22.237	22.5349	22.4722	22.2352	22.643	22.1376	22.4145	22.3977	22.7199	22.5329	22.6215	22.0295	22.7499	22.4675	22.0163	22.5211	22.0791						+	+				halfMIC_Ctrl;MIC_Ctrl	6	6	6	27.9	27.9	27.9	42.266	0	78.843
20.3189	19.7416	21.3026	21.1219	21.6223	21.2566	21.256	21.26	21.3987	21.5788	21.3833	21.1661	21.3777	21.201	21.3763	21.6552	21.4417	21.0124	21.4133	19.7589	21.4828	21.5897	21.8169	21.9	19.6798	21.6409	21.4177	19.5525	21.8217	19.9596												6	6	6	22.9	22.9	22.9	45.646	0	27.652
20.5212	22.9621	22.5768	22.9513	23.0399	23.0318	23.1341	23.1103	23.3537	23.1014	22.9273	23.1355	23.2572	23.3365	23.0658	23.4836	23.2935	23.2886	23.3489	23.5277	23.261	23.2314	23.1889	23.4093	23.1561	23.376	23.0357	23.2034	23.2636	23.2728						+	+				halfMIC_Ctrl;MIC_Ctrl	6	6	6	31.2	31.2	31.2	31.359	0	61.005
25.9468	26.2569	25.8118	26.2382	26.4731	26.1108	26.3349	26.1744	26.3092	26.3044	26.3485	26.2671	26.6492	26.5577	26.581	26.6461	26.5633	26.5757	26.4435	26.4483	26.5522	26.7584	26.6824	26.5681	26.3804	26.6285	26.5114	26.2576	26.6017	26.3722					+	+	+				halfMIC_Ctrl;MIC_Ctrl;quarterMIC_Ctrl	29	29	29	47.3	47.3	47.3	74.885	0	241.3
26.6784	27.0748	26.7844	27.0947	27.1854	26.9311	27.1582	26.8695	27.0845	27.1155	27.2792	27.1134	27.2902	27.2651	27.2783	27.3868	27.31	27.3409	27.3077	27.2466	27.2485	27.3778	27.3885	27.3844	27.0313	27.3161	27.335	27.106	27.3117	27.2654					+	+	+				halfMIC_Ctrl;MIC_Ctrl;quarterMIC_Ctrl	21	21	21	64.2	64.2	64.2	56.423	0	238.85
21.2645	22.9121	20.7811	22.8717	22.9433	19.4362	22.8182	19.6589	19.5346	20.2149	21.1867	19.7359	20.4961	23.1676	23.248	23.3363	19.4326	20.1962	20.0233	19.4488	18.4394	19.6618	20.2183	19.4161	23.0221	20.1782	20.3226	20.3411	20.6783	19.4467							+				MIC_Ctrl	3	3	3	16.9	16.9	16.9	27.123	0	5.0121
22.6666	22.9795	22.5469	22.8262	22.9539	22.8612	22.8567	22.8146	23.128	22.7692	23.0548	23.0259	23.4799	23.1153	23.2539	23.4246	23.2004	23.4659	23.2988	22.8163	23.197	23.0887	23.2571	23.4793	22.8745	23.2428	23.206	23.0281	23.2366	23.2524					+	+	+				halfMIC_Ctrl;MIC_Ctrl;quarterMIC_Ctrl	5	5	5	34.2	34.2	34.2	21.472	0	39.48
24.6044	23.7844	25.2001	23.6376	23.2301	23.2914	23.4542	23.7851	23.4359	23.1767	23.0821	23.7751	23.0866	23.1115	23.0681	22.6964	22.8638	22.7089	22.3865	23.3922	24.1497	23.2478	22.1975	22.8155	23.9827	23.1762	22.8859	23.6597	22.9558	23.0147						+	+				halfMIC_Ctrl;MIC_Ctrl	4	4	4	53.5	53.5	53.5	10.006	0	24.995
26.2956	26.4936	26.4779	26.539	26.4898	26.3961	26.3737	26.2477	26.4826	26.3997	26.4496	26.2809	26.5089	26.4289	26.4959	26.644	26.3975	26.5533	26.5828	26.4264	26.6085	26.6417	26.4578	26.6421	26.3952	26.4736	26.4685	26.464	26.483	26.4566							+				MIC_Ctrl	22	22	22	55.4	55.4	55.4	51.968	0	181.65
22.0893	21.9874	21.6044	21.8335	22.2775	21.8891	22.0203	21.9239	22.1489	22.1929	22.2538	22.0698	21.9484	22.0638	22.2508	22.2973	22.1474	22.2419	22.0601	21.8575	21.8488	22.2399	22.0541	22.4016	21.886	22.2249	22.1158	21.8276	22.4386	22.1028						+					halfMIC_Ctrl	3	3	3	42	42	42	13.021	0	71.169
21.0002	19.7513	20.2142	20.6815	20.5093	20.1326	21.604	20.5133	19.7728	21.7221	20.8837	20.8103	20.9684	20.9561	20.6891	20.9495	21.167	21.3491	21.0774	21.3988	20.8504	21.2599	21.1482	20.965	20.2641	21.7103	21.1195	20.5688	21.5168	21.0068					+	+	+				halfMIC_Ctrl;MIC_Ctrl;quarterMIC_Ctrl	3	3	3	23	23	23	25.891	0	5.206
29.855	29.4472	29.6538	29.4454	29.3451	29.3674	29.4018	29.3597	29.5061	29.4529	29.4134	29.1617	29.2309	29.3272	29.3062	29.5949	29.3572	29.3307	29.4604	29.3997	29.5706	29.5006	29.2272	29.2694	29.6409	29.2157	29.1841	29.5792	29.2549	29.4626												13	13	13	91.8	91.8	91.8	11.595	0	215.6
23.2724	23.3185	23.0975	23.4492	23.5561	23.4806	23.109	23.0667	23.2319	23.2737	23.5148	23.1578	23.5347	23.4975	23.7356	23.3593	23.5739	23.5266	23.8858	23.6485	23.4584	23.4808	23.9562	23.4681	23.2134	23.3294	23.4329	23.5126	23.4089	23.3928						+	+				halfMIC_Ctrl;MIC_Ctrl	9	9	9	38.7	38.7	38.7	33.737	0	30.917
24.2457	24.5594	24.3346	24.7963	24.9599	24.5627	24.5019	24.2005	24.3136	24.3342	24.5484	24.4938	24.7895	24.4692	24.6349	24.6281	24.6963	24.7395	24.621	24.5525	24.5241	24.9646	24.7345	24.8331	24.1084	24.7723	24.5276	24.2501	24.7298	24.4886												8	8	8	49.5	49.5	49.5	20.63	0	44.058
21.3006	20.93	20.7972	20.8032	21.0993	20.9309	19.7122	20.596	20.9047	20.9936	21.0348	20.7563	20.8805	20.8171	19.9115	20.741	20.7167	20.7683	20.7869	20.6031	21.2302	20.7815	21.2743	21.0715	20.7311	20.821	20.8415	20.6673	20.8607	20.6978					+	+					halfMIC_Ctrl;quarterMIC_Ctrl	3	3	3	21.6	21.6	21.6	17.435	0	12.256
23.8743	23.781	23.7008	23.6659	23.9319	23.6169	24.0486	23.2947	24.205	24.2134	24.2516	23.8991	24.3028	24.2964	24.4736	24.7362	24.295	24.5055	24.5132	24.3742	24.4984	24.6359	24.2536	24.6642	24.2213	24.1217	24.101	24.347	24.1611	24.4076					+	+	+				halfMIC_Ctrl;MIC_Ctrl;quarterMIC_Ctrl	3	3	3	34.4	34.4	34.4	17.121	0	56.081
21.5639	19.8268	21.777	20.7317	20.7858	19.9403	20.5442	20.2689	19.6257	20.3397	20.2958	20.5134	19.433	20.4473	19.7948	19.9984	20.1652	19.7964	19.3847	20.2099	19.8074	20.3881	20.2814	20.0188	20.9707	19.7023	20.2435	20.8163	19.7611	20.305						+	+				halfMIC_Ctrl;MIC_Ctrl	7	7	7	24.3	24.3	24.3	38.745	0	17.179
21.9797	21.9597	21.7995	22.0053	21.8725	21.7702	22.3703	21.4403	21.4656	21.3534	21.6469	21.7639	21.9353	21.7464	21.9809	21.8249	21.9366	22.0191	21.975	22.0237	22.7372	22.2268	21.6887	21.9753	21.7737	21.4124	21.7471	21.6605	21.7397	21.3244					+						quarterMIC_Ctrl	13	13	13	20.8	20.8	20.8	99.902	0	60.549
22.7534	23.167	22.8305	23.2901	23.5062	22.9715	23.0783	23.2852	23.4004	23.5052	23.2761	23.1243	23.5491	23.5191	23.7173	23.7043	23.4643	23.5133	23.5526	23.5308	23.5385	23.7309	23.691	23.8068	23.228	23.4207	23.4418	23.478	23.568	23.3921					+	+	+				halfMIC_Ctrl;MIC_Ctrl;quarterMIC_Ctrl	19	19	19	21.7	21.7	21.7	133.11	0	102.91
23.9168	24.4416	24.0201	24.4294	24.6233	24.2765	24.5748	24.332	24.5486	24.3901	24.5974	24.3097	24.7357	24.6158	24.7643	24.6742	24.6679	24.7642	24.6255	24.6021	24.5607	24.9552	24.7119	24.9072	24.2279	24.6487	24.5873	24.5765	24.6448	24.582						+	+				halfMIC_Ctrl;MIC_Ctrl	16	16	16	55.5	55.5	55.5	46.618	0	99.095
20.2432	19.8558	21.0911	21.2496	21.0591	20.3148	21.3113	20.8869	21.1546	21.1611	21.391	20.3168	21.1584	21.2493	21.0544	21.2624	21.1684	21.1579	21.2799	19.8065	20.317	21.14	21.066	21.2091	21.1009	20.8614	21.0953	21.1557	21.1148	21.2428						+					halfMIC_Ctrl	2	2	2	12.6	12.6	12.6	23.754	0	8.8869
23.2044	23.7068	23.4171	23.589	23.8072	23.5845	23.7526	23.5596	23.7606	23.6473	23.7595	23.6307	23.9668	23.7908	23.8627	23.7185	23.7401	24.0371	23.9589	23.9344	23.6857	23.1629	23.7891	24.1406	23.3217	23.8001	24.0733	23.3262	24.0558	23.8807						+					halfMIC_Ctrl	6	6	6	60.5	60.5	60.5	15.061	0	103.28
21.8389	21.9244	21.9414	22.185	22.0377	22.032	22.1951	22.032	22.1213	22.0434	22.4405	21.8933	21.9787	22.1402	22.3267	22.4098	22.2332	22.1395	22.1138	22.317	22.0785	22.2951	22.3665	22.2537	22.1082	21.9155	22.1832	21.9713	22.0718	22.2085						+	+				halfMIC_Ctrl;MIC_Ctrl	4	4	4	19.9	19.9	19.9	34.583	0	10.838
23.3881	23.4035	23.4171	23.5318	23.4903	23.2842	23.4492	23.6306	23.5413	23.5783	23.6625	23.2521	23.4043	23.2538	23.3676	23.2999	23.2677	23.6648	23.1261	23.5285	23.2413	23.3246	23.2337	23.4305	23.1862	23.1127	23.2564	23.4493	23.3945	23.3222												9	9	9	28.5	28.5	28.5	42.58	0	51.039
22.4598	22.6954	22.4828	22.6377	22.6824	22.3879	21.6179	22.5438	22.3511	22.2623	22.7616	22.4003	22.6418	22.5261	22.7326	22.4921	22.1175	22.4617	22.8549	22.5962	22.5376	22.5841	22.8584	22.0548	21.8934	22.3189	22.4712	22.307	22.4083	22.8459												8	8	8	11.4	11.4	11.4	88.66	0	8.9509
19.4716	19.7353	19.1785	19.536	20.0386	20.2569	22.2673	20.3801	19.7831	21.4248	20.0455	18.7804	19.3837	20.3057	22.2802	20.1137	21.9336	19.9969	19.0295	19.988	20.8574	21.8865	22.4319	19.6509	20.5032	22.2277	19.8297	21.8888	22.1006	22.251					+	+					halfMIC_Ctrl;quarterMIC_Ctrl	3	3	3	9.4	9.4	9.4	56.741	0	3.1147
21.6455	22.3332	22.0122	19.0843	22.1196	21.9895	22.4633	22.5996	21.7509	22.1444	22.121	22.3968	22.0531	22.2808	22.281	21.8869	22.2485	21.6256	21.3503	21.9417	21.5157	21.7154	22.0409	21.9772	22.3747	22.3234	22.0045	21.9389	22.0705	21.7446												7	7	7	23.2	23.2	23.2	48.261	0	43.503
25.4718	25.6812	25.6107	25.6861	25.7776	25.664	25.7977	25.5761	25.8163	25.6884	25.8383	25.668	25.9149	25.893	25.9484	26.071	25.9578	25.8934	25.834	25.7981	25.9222	26.0889	25.9605	25.875	25.7829	25.8472	25.9059	25.7894	25.9115	25.7917					+	+	+				halfMIC_Ctrl;MIC_Ctrl;quarterMIC_Ctrl	9	9	9	30.6	30.6	30.6	40.618	0	134.58
23.8052	24.1332	23.9403	24.1853	24.2228	23.8544	23.7727	23.779	23.904	23.9308	24.0178	24.0214	24.0364	23.8441	24.1396	24.0848	24.0003	24.0074	24.1531	24.0272	24.1629	24.6516	24.1529	24.1641	24.1131	24.1187	24.1527	24.3583	24.1424	24.0143												9	9	9	27.8	27.8	27.8	46.725	0	130.18
23.5796	23.833	23.5585	23.9151	23.9509	23.99	23.8309	23.8757	24.0337	24.0682	23.9485	23.8088	23.9287	23.9521	23.9291	24.2326	24.1257	24.1586	24.0102	23.7067	24.0477	23.852	23.9204	23.809	23.9153	23.8936	24.1384	23.9792	24.0472	23.9276						+					halfMIC_Ctrl	11	11	11	37	37	37	43.108	0	32.2
22.236	22.5094	22.091	22.298	22.7978	22.2652	22.6133	22.1709	22.9962	22.6171	22.6531	22.4062	22.8768	22.8603	22.7718	22.7396	22.5337	23.0286	23.0282	22.6654	22.4691	22.8458	22.6852	22.8091	22.8238	22.7402	22.8562	22.8011	22.7336	22.768					+	+	+				halfMIC_Ctrl;MIC_Ctrl;quarterMIC_Ctrl	8	8	8	28.6	28.6	28.6	45.016	0	30.697
22.0671	22.3421	22.5478	21.9409	22.3859	19.6839	20.5733	21.2716	20.7563	21.9904	20.9811	21.3828	21.4724	21.2713	21.1277	20.9212	21.0691	21.1631	20.8837	19.5214	21.9804	21.2422	21.5894	21.0169	21.2847	21.2563	21.2596	21.1669	21.4298	21.8538												7	1	1	40.9	5.9	5.9	23.472	0	6.7938
20.0508	20.331	19.3055	20.5577	20.7	19.7562	20.559	20.7987	19.5268	20.8262	20.5593	20.8947	19.8095	20.7917	20.5983	20.9416	20.8419	20.3033	20.7835	19.7499	20.3559	19.1987	20.1479	20.8937	21.1212	20.9007	20.9162	20.6035	20.2851	19.496												2	2	2	11.2	11.2	11.2	28.469	0	11.222
22.9314	23.2557	23.0825	22.9243	23.3676	23.0724	22.8938	23.2506	23.0248	22.9048	22.9904	22.748	22.983	22.8948	23.1081	23.0141	23.2384	23.3605	22.9973	22.7255	22.9003	22.98	23.0456	22.7834	22.7644	23.1283	23.0674	23.1407	22.8604	22.9709							+				MIC_Ctrl	7	7	7	33.6	33.6	33.6	25.388	0	14.145
21.2384	21.1038	20.4899	21.6273	21.5947	20.5888	21.333	21.2286	21.348	21.4578	21.2999	21.7015	22.0434	22.2367	22.2442	21.6371	22.2769	22.0363	21.7482	21.6308	22.1953	22.0723	22.1462	21.9747	21.3194	21.8106	21.9225	21.5252	22.1306	20.9569						+	+				halfMIC_Ctrl;MIC_Ctrl	5	5	5	45.2	45.2	45.2	20.729	0	15.924
25.5726	25.8088	25.6557	25.8295	25.7845	25.6421	25.8744	25.6036	25.9549	25.8042	25.8996	25.7175	25.8523	25.8247	25.9874	26.0922	25.8534	25.9391	25.9246	25.8137	25.8977	25.7961	25.9695	26.0713	25.802	25.8215	25.909	25.8985	25.8672	25.8951					+	+	+				halfMIC_Ctrl;MIC_Ctrl;quarterMIC_Ctrl	11	11	11	53	53	53	21.69	0	111.55
19.1897	19.6241	19.2207	19.3218	19.4949	19.2102	22.0515	19.7745	20.7596	19.1001	19.0719	19.3034	18.4467	18.1888	18.9147	18.4493	18.7264	18.8628	19.1391	19.735	18.4248	20.7076	20.0235	18.9764	20.7884	18.2959	18.8633	18.8461	19.6404	18.4838						+					halfMIC_Ctrl	2	2	2	13.1	13.1	13.1	15.348	0	29.332
19.6832	20.3218	19.7899	20.9893	21.3888	20.1764	19.5268	19.2226	19.6291	19.3524	20.8378	20.5936	21.0208	19.239	21.8747	21.7151	21.2449	21.7446	21.0067	19.9553	19.7976	20.0681	21.4054	20.7819	19.317	19.182	19.9336	19.8953	19.0063	19.9431					+						quarterMIC_Ctrl	2	2	2	16	16	16	25.646	0	11.693
21.6961	21.6533	21.3294	21.7444	22.0122	21.6086	21.8259	21.1736	21.4826	21.3524	21.7053	21.4262	21.7215	21.9343	21.994	21.7975	21.8171	21.9778	21.4102	21.732	21.9701	21.8888	21.9113	21.7112	21.5188	21.6967	21.636	21.6431	21.6943	21.7073						+					halfMIC_Ctrl	2	2	2	36	36	36	11.519	0	57.125
22.5378	23.1418	22.7878	22.9812	23.289	23.0864	23.3754	22.8673	23.2071	23.1393	23.2236	23.0731	23.1961	23.3446	23.2985	23.4406	23.215	23.2177	23.3838	22.9274	23.1112	22.973	23.3615	23.568	22.7754	23.171	23.0671	23.145	23.1628	23.0805						+					halfMIC_Ctrl	9	9	9	44.5	44.5	44.5	31.669	0	62.648
21.8536	21.68	21.8223	22.4087	21.8442	21.8785	22.0493	21.6413	21.6587	21.5048	21.7273	18.7182	21.6335	21.8489	21.815	22.569	22.356	21.9586	22.0116	21.9121	22.0164	21.9852	22.5083	22.127	21.5961	21.8836	21.5122	21.9677	21.8988	20.4297												5	5	5	28.2	28.2	28.2	39.783	0	8.4963
28.3002	28.2903	28.1804	28.2157	28.2803	28.2396	28.0729	28.1824	28.3073	28.2632	28.2258	28.1335	28.0883	28.1471	28.2559	28.3388	28.1562	28.2899	27.9949	28.1103	28.0811	28.29	28.0144	28.0733	28.2823	28.2489	28.1884	28.3061	28.2006	28.3237							+				MIC_Ctrl	10	10	10	61.8	61.8	61.8	16.242	0	88.747
25.2475	25.5175	25.362	25.5741	25.7093	25.4871	25.6775	25.4221	25.7576	25.6552	25.6073	25.458	25.7664	25.8584	25.8753	25.8636	25.7956	25.9513	25.8817	25.7619	25.7871	25.8751	25.8972	25.8749	25.5182	25.6471	25.7477	25.7091	25.7882	25.785					+	+	+				halfMIC_Ctrl;MIC_Ctrl;quarterMIC_Ctrl	20	20	20	51.1	51.1	51.1	50.955	0	208.11
29.7198	29.9954	29.85	29.984	30.0606	29.84	29.9224	29.8649	30.0521	30.0751	30.0921	29.9555	30.0811	30.0752	30.1507	30.1753	30.0637	30.2005	30.1325	29.9787	30.0177	30.1402	30.1323	30.2742	30.0238	30.0534	30.0955	30.0761	30.0316	30.1287					+	+	+				halfMIC_Ctrl;MIC_Ctrl;quarterMIC_Ctrl	23	23	23	54.7	54.7	54.7	49.481	0	240.7
22.0713	19.9655	21.3808	21.4439	21.8002	18.8247	21.6341	21.7541	22.0779	21.4115	21.7766	21.0779	21.8915	21.9576	22.0328	21.5861	21.922	21.9817	21.6665	21.432	21.502	22.3193	21.8882	21.9758	21.7265	22.0139	21.498	20.2391	21.564	21.5464						+					halfMIC_Ctrl	6	6	6	20.5	20.5	20.5	44.767	0	25.316
26.0003	26.0994	26.1267	26.2096	26.2984	26.0455	26.1825	26.1054	26.2146	26.2258	26.3161	26.1599	26.31	26.3615	26.4372	26.5507	26.4293	26.5137	26.3675	26.298	26.3744	26.5504	26.3926	26.4661	26.1841	26.3143	26.3153	26.3164	26.3302	26.4337					+	+	+				halfMIC_Ctrl;MIC_Ctrl;quarterMIC_Ctrl	18	18	18	44.2	44.2	44.2	48.639	0	162.76
26.1868	26.2301	26.3577	26.2591	26.1923	26.2292	26.3197	26.5093	26.2086	26.2854	26.2079	26.3404	25.9909	26.1325	26.1048	26.069	25.871	25.9916	26.0703	26.3749	26.3803	26.0698	26.454	26.6362	26.5199	26.1627	26.1384	26.3615	26.1852	26.2047						+					halfMIC_Ctrl	6	6	6	42.8	42.8	42.8	19.539	0	239.25
21.3967	21.2391	21.1288	21.3489	21.2467	21.3478	21.2524	21.4039	21.622	21.379	21.6806	21.1282	21.6775	21.5293	21.7517	21.393	21.2745	21.5584	21.9907	21.7544	21.7297	22.2419	21.8869	21.9461	21.3541	21.4865	21.4699	21.473	21.539	21.4437					+	+	+				halfMIC_Ctrl;MIC_Ctrl;quarterMIC_Ctrl	7	7	7	25.9	25.9	25.9	36.047	0	9.883
19.347	19.61	19.7551	19.7379	19.7963	20.1115	19.5016	19.8278	21.1275	19.3495	20.1054	21.0945	21.1503	21.4339	20.3425	21.2778	21.3855	21.1776	21.1411	21.1636	21.1005	21.4168	20.066	20.7658	21.1368	21.2839	20.4302	20.3153	20.2989	21.1782					+	+	+				halfMIC_Ctrl;MIC_Ctrl;quarterMIC_Ctrl	3	3	3	5.2	5.2	5.2	96.865	0	14.449
22.1045	23.0118	22.476	22.3878	22.326	21.9535	22.2886	22.2324	22.3365	22.1962	22.1751	21.1485	22.0441	19.7582	19.4411	22.4309	20.1793	20.2416	19.8213	19.7918	22.3004	20.3252	20.3238	22.8856	18.8542	18.9197	22.2202	22.2507	19.1128	19.8127					+	+	+				halfMIC_Ctrl;MIC_Ctrl;quarterMIC_Ctrl	2	2	2	14.9	14.9	14.9	17.511	0	8.2493
22.405	22.3785	22.5282	22.7842	22.781	22.0351	22.7317	22.4991	22.659	22.7349	22.8513	22.4687	22.7104	22.96	22.8458	22.8559	22.9833	23.0076	22.653	22.881	23.0706	23.1699	22.8602	23.075	22.8027	22.7849	22.6909	22.7314	22.5678	22.8332						+	+				halfMIC_Ctrl;MIC_Ctrl	8	8	8	33.1	33.1	33.1	41.086	0	124.18
23.4443	23.7729	23.6486	23.7168	23.9746	23.5145	23.7422	23.6051	23.9683	23.8274	24.0046	23.7158	24.0852	24.0972	24.0236	24.1215	24.0524	24.1661	23.9728	24.1406	23.9906	24.2204	23.893	24.1154	24.0528	23.9659	24.0271	23.881	24.1031	24.0318					+	+	+				halfMIC_Ctrl;MIC_Ctrl;quarterMIC_Ctrl	14	14	14	54.2	54.2	54.2	36.116	0	84.192
20.1031	21.4098	22.1791	21.1067	20.2112	20.7754	20.5047	20.7269	20.2144	20.7192	20.7489	20.2232	19.1423	20.237	20.1445	20.3429	20.4376	19.776	20.3928	21.2378	20.4703	20.7954	19.1793	20.1958	19.5804	20.117	20.0007	20.798	20.6393	20.592						+					halfMIC_Ctrl	5	5	5	10.7	10.7	10.7	69.252	0	14.877
19.0748	23.6534	23.5786	23.7305	23.9311	23.4418	23.8444	23.5477	23.9711	23.7867	24.429	23.9821	24.1525	24.0719	24.1437	23.9915	24.0461	24.0821	24.1158	23.8814	24.1603	24.4034	24.2139	24.3568	23.6591	24.1551	24.0935	23.8588	24.1473	24.0761												5	5	5	28.8	28.8	28.8	16.081	0	19.253
20.7149	21.0696	21.2935	20.842	21.4987	20.8835	21.2351	21.0534	21.3753	21.2732	21.1081	21.2936	21.5213	21.7497	21.1806	20.8783	21.5083	21.459	21.6624	21.4033	21.5782	21.1999	21.4284	21.3814	21.3146	21.6609	21.5106	21.2101	21.5883	21.3684					+	+	+				halfMIC_Ctrl;MIC_Ctrl;quarterMIC_Ctrl	4	4	4	29.2	29.2	29.2	29.889	0	32.634
23.4345	23.329	23.0203	23.7553	23.5577	23.5365	23.7553	23.2542	23.7727	23.7426	23.7427	23.4345	23.6345	23.7361	23.626	23.7968	23.7062	23.7823	23.8364	23.5079	23.5217	23.7327	23.7438	23.9193	23.6316	23.6814	23.7531	23.8007	23.8066	23.7002					+	+	+				halfMIC_Ctrl;MIC_Ctrl;quarterMIC_Ctrl	11	11	11	43.8	43.8	43.8	43.046	0	40.532
25.3789	24.9869	26.1669	25.1251	25.1285	24.861	24.9456	24.9644	24.9217	25.1674	24.9537	25.1427	24.7743	24.9219	24.8381	24.9466	24.8762	24.8515	24.8569	24.9664	24.9804	25.0994	24.8542	24.8854	25.0562	25.0112	24.8771	25.0808	24.9856	25.109						+					halfMIC_Ctrl	17	17	17	45.7	45.7	45.7	53.221	0	143.84
21.9985	22.0243	23.1748	22.5042	22.3413	21.7001	21.7072	21.9326	21.7154	22.2111	22.1697	22.1873	22.4478	21.9941	22.2323	22.4423	22.4396	22.2925	22.4238	22.1716	22.2945	22.3287	22.3245	22.2982	22.0489	22.3679	22.4233	21.9057	22.536	22.3563												4	4	4	33.1	33.1	33.1	19.611	0	22.567
23.1907	23.6099	23.6635	23.7808	23.8771	23.8493	23.9515	23.5737	23.92	23.8704	23.6859	23.9137	24.0714	23.7883	24.0374	24.1209	23.7669	23.7165	23.2304	24.1467	24.0263	24.2968	23.8084	23.7176	23.7407	24.2339	23.8249	23.9822	23.8099	24.0799						+					halfMIC_Ctrl	6	6	6	32.1	32.1	32.1	33.158	0	77.942
28.7791	28.8629	28.8588	28.7721	28.3316	28.7326	28.5963	28.5256	28.7508	28.4294	28.7634	28.5046	28.5045	28.4865	28.7172	28.7278	28.6196	28.6264	28.6681	28.5954	28.4918	28.6126	28.6414	28.5137	29.1004	28.5835	28.6481	28.8546	28.5351	28.7507												9	9	9	59	59	59	13.748	0	200.95
23.4768	23.595	23.3621	23.799	23.7845	23.5323	23.9639	23.5578	23.7146	23.7671	23.7878	23.5117	23.8563	23.7873	23.8832	23.9326	23.6415	23.9702	23.9164	23.7546	23.7254	23.5764	23.756	23.8615	23.5677	23.6815	23.8026	23.6263	23.8503	23.8549						+	+				halfMIC_Ctrl;MIC_Ctrl	13	13	13	59	59	59	36.847	0	83.503
22.0161	22.1259	21.799	22.3581	22.1233	22.0309	21.995	21.692	22.2433	21.958	22.0382	21.5514	22.2609	21.9558	22.2598	22.5554	22.1959	22.3047	22.0455	22.2404	22.134	22.4761	22.5657	22.3901	21.9733	22.069	22.2588	22.295	22.0692	21.905							+				MIC_Ctrl	7	7	7	20.4	20.4	20.4	57.927	0	53.833
24.6428	24.9687	24.7711	24.9672	25.0649	25.0765	24.8168	24.6668	24.9323	24.7311	24.9661	24.7196	25.1082	25.0914	25.0444	25.1877	25.0848	25.1179	25.1154	24.956	25.0397	25.1617	25.1936	25.2327	24.8829	25.0185	25.0721	24.8928	25.1027	25.0918						+	+				halfMIC_Ctrl;MIC_Ctrl	10	10	10	44.4	44.4	44.4	36.909	0	70.773
20.2619	20.7458	20.52	20.9328	21.1727	20.4029	20.1277	21.7248	21.1843	20.9362	20.8404	21.1758	21.9993	21.7575	20.5773	20.8865	20.805	21.1727	22.1291	21.9606	21.9769	20.9922	20.1134	20.4471	21.8775	21.8151	21.4455	21.5598	21.5118	21.3265					+	+					halfMIC_Ctrl;quarterMIC_Ctrl	3	3	3	28.8	28.8	28.8	13.34	0	18.05
23.3749	23.4633	23.1156	23.6188	23.6359	23.8046	23.6807	23.4482	23.7463	23.6292	23.651	23.6648	23.5317	23.6771	23.7769	23.939	23.7534	23.7695	23.928	23.6309	23.7724	24.2362	23.7783	23.8459	23.4875	23.5889	23.7453	23.6633	23.4936	23.7331						+	+				halfMIC_Ctrl;MIC_Ctrl	9	9	9	36.6	36.6	36.6	44.14	0	57.21
22.1629	22.2142	22.0936	22.5293	22.4937	20.309	22.0875	22.435	22.4605	22.5041	22.6763	22.2834	22.5495	22.3142	22.7641	22.817	22.597	22.7688	22.658	22.3747	22.5319	22.4664	22.7871	22.4201	22.4729	22.6792	22.4903	22.5532	22.5314	22.5266						+					halfMIC_Ctrl	5	5	5	27	27	27	34.513	0	43.016
21.5816	21.7355	21.3724	21.894	21.7596	21.6844	21.6267	21.5836	21.7631	21.5677	20.488	21.4638	21.8309	21.7206	19.2811	19.9937	20.7486	19.3145	21.6595	21.6095	21.7617	21.7425	21.8067	21.7764	21.5463	21.9048	21.8118	18.7027	21.9971	20.8543						+					halfMIC_Ctrl	3	3	3	21.4	21.4	21.4	18.5	0	3.4399
21.2418	21.2669	21.6695	21.6039	21.3893	21.0128	21.0577	21.4083	21.2567	20.9904	21.0061	21.4742	21.4325	21.3794	21.2759	21.3086	21.1317	20.9292	21.3307	21.7571	22.1681	21.3068	21.1645	21.5129	21.7048	21.5397	21.2536	21.6718	21.3002	21.1127												4	4	4	22.2	22.2	22.2	46.785	0	15.58
22.5208	22.7995	22.4119	22.8711	23.1619	22.8109	22.9093	22.7754	23.0548	22.6586	23.1688	23.0084	23.1978	23.148	23.1502	23.2613	23.0019	23.2353	23.156	22.9071	23.0312	23.1325	23.4205	23.4125	22.8172	23.1267	23.1351	22.7884	22.9404	22.8346						+	+				halfMIC_Ctrl;MIC_Ctrl	8	8	8	34	34	34	38.968	0	25.141
22.5869	22.9449	22.4404	22.9155	22.9249	22.7599	22.8282	22.9758	22.8051	22.7434	23.0625	22.8834	22.9742	22.9436	22.9928	22.9946	22.9438	23.2049	23.1193	22.9577	23.1111	23.506	23.21	22.9771	22.738	23.0559	23.0686	22.9217	23.0822	22.7326						+	+				halfMIC_Ctrl;MIC_Ctrl	11	11	11	46.4	46.4	46.4	36.691	0	66.536
26.15	26.5149	26.4256	26.6342	26.6524	26.4776	26.5286	26.3204	26.6803	26.6852	26.7506	26.6133	26.615	26.5508	26.5388	26.7402	26.6061	26.7582	26.6713	26.5288	26.5989	26.6317	26.6622	26.6355	26.3528	26.651	26.7573	26.4463	26.727	26.7229						+					halfMIC_Ctrl	22	22	22	50.7	50.7	50.7	58.379	0	253.44
20.8114	20.554	21.7697	21.5093	21.996	20.599	20.7081	20.0414	21.7525	20.183	19.7704	21.6223	22.142	21.8581	20.1025	22.0313	21.7944	19.1509	20.22	19.6289	20.1103	22.7879	22.1444	21.914	20.6981	21.9138	21.893	21.6219	18.8269	21.6297												6	6	6	15.4	15.4	15.4	64.87	0	24.105
21.7294	22.421	21.9594	22.0628	22.1816	22.0458	22.2353	21.8318	22.4387	22.2489	22.3679	22.2137	22.6275	22.5302	22.2641	22.1607	22.468	22.4543	22.4413	21.795	22.3962	21.9901	22.5266	22.3954	22.1039	22.3212	22.3779	22.2908	22.2038	22.498						+					halfMIC_Ctrl	6	6	6	31.6	31.6	31.6	30.769	0	9.352
24.1541	24.3691	24.1749	24.5532	24.7263	24.4659	24.5243	24.4064	24.6084	24.5072	24.5589	24.5295	24.7034	24.7011	24.6065	24.8178	24.6083	24.6957	24.6668	24.5948	24.6081	24.6208	24.6493	24.6629	24.5164	24.6114	24.62	24.6326	24.76	24.7065					+	+	+				halfMIC_Ctrl;MIC_Ctrl;quarterMIC_Ctrl	17	17	17	58.8	58.8	58.8	42.851	0	125.85
24.8031	25.1906	25.0562	25.0292	25.1907	24.8476	24.8267	24.6975	24.9262	25.1256	24.8748	25.0084	24.9777	24.8481	24.7043	24.9321	24.8141	24.8787	24.9102	24.889	24.9086	24.9364	24.967	24.8217	24.8513	24.9964	25.0611	24.8912	24.874	25.0412						+					halfMIC_Ctrl	14	14	14	40.9	40.9	40.9	48.521	0	48.111
21.485	21.5805	20.9088	20.2578	21.7641	21.4061	20.3492	19.8947	21.3297	21.5779	21.6667	19.0296	21.3634	18.5399	21.4979	21.5417	21.0213	21.6273	21.5513	21.5446	21.0834	20.1134	21.7159	21.3102	19.6676	21.3072	21.7539	21.6344	21.8227	21.5839												8	8	8	22.7	22.7	22.7	50.894	0	11.365
20.2977	21.1318	20.5107	21.1099	21.2134	21.0575	21.1697	20.8665	21.375	21.1311	21.3796	20.7631	21.2708	20.9822	21.381	21.2105	20.8069	21.1755	21.1383	21.1228	21.312	19.5439	21.319	21.2121	21.092	21.1389	21.3265	21.2189	21.1145	20.4308												3	3	3	12.6	12.6	12.6	26.618	0	4.1558
24.6744	24.9276	24.5051	24.8533	24.9904	24.8201	24.6968	24.5438	24.805	24.7749	24.7671	24.558	25.0592	25.0163	24.998	25.0595	24.9633	25.0964	25.0267	24.8666	24.819	24.7305	24.9153	24.8303	24.667	24.8924	25.0109	24.7055	24.928	24.9359						+					halfMIC_Ctrl	12	12	12	58.5	58.5	58.5	26.692	0	70.181
22.924	22.7699	22.6501	23.0485	23.0252	22.5721	22.6234	22.9084	22.4145	22.8428	22.6129	22.7901	22.6414	22.648	22.483	23.0145	22.5029	22.9614	22.7995	22.4653	22.6014	22.7761	22.572	22.6477	22.8482	22.8045	22.7569	22.6651	22.5443	22.6754												6	6	6	35.7	35.7	35.7	30.925	0	42.191
22.3545	22.0003	22.2821	22.5064	22.5604	22.5347	22.5277	22.4337	22.6708	22.5303	22.4655	22.3192	22.6926	22.9833	22.6606	23.0414	22.8427	22.6421	22.6846	22.435	22.6682	23.022	22.9184	23.0385	22.5243	22.7168	22.5411	22.3613	22.7742	22.6146						+	+				halfMIC_Ctrl;MIC_Ctrl	7	7	7	26.3	26.3	26.3	34.803	0	20.463
19.7552	21.2253	21.3607	21.2223	21.4798	21.2332	21.2208	20.9169	20.2385	20.6442	19.8781	21.0004	19.3519	20.836	18.0333	20.587	20.7678	20.271	21.3047	20.3855	21.3057	21.191	21.2733	20.4118	20.0973	20.1833	21.1058	18.873	19.4618	19.1836					+	+					halfMIC_Ctrl;quarterMIC_Ctrl	4	4	4	36.1	36.1	36.1	14.178	0	2.9752
24.2891	24.0424	24.4243	24.2075	23.905	24.3426	24.2087	24.422	24.3554	24.2252	24.3894	24.2384	23.9492	23.9874	24.0554	24.3419	24.1826	24.0846	24.1678	24.1809	24.1223	24.0549	24.1871	24.2833	24.1043	24.1472	24.2847	24.3149	24.2215	24.116												8	8	8	41.7	41.7	41.7	33.804	0	30.79
20.5242	19.8667	20.6239	20.9079	20.846	21.3017	20.2698	20.3494	20.4407	20.4488	20.5518	20.5754	20.9757	19.7592	19.7445	20.1152	18.6067	20.5901	20.5323	20.9812	19.9132	19.3611	20.5573	19.0903	21.0087	20.7559	21.076	20.529	20.4685	20.4388												4	4	4	31.2	31.2	31.2	22.28	0	3.9477
21.7332	22.2398	21.4546	21.9439	21.9097	21.3947	21.8093	21.3219	21.6231	21.8077	21.3676	21.6394	21.7439	21.4781	21.8666	22.0341	21.7327	21.9388	21.8987	22.0545	22.0586	21.9754	21.7616	22.1218	21.4149	21.8866	21.5603	21.6986	21.5195	21.578												4	4	4	28.3	28.3	28.3	23.424	0	69.655
20.3468	22.309	22.4504	22.2874	23.0563	22.2574	22.6028	22.3706	22.5993	22.6187	22.5067	22.682	22.7549	22.9233	22.7088	22.5657	22.7546	22.7987	22.791	22.4512	22.4558	22.314	23.2189	22.5953	22.453	22.705	22.5599	22.366	23.0428	22.9054												4	4	4	18.8	18.8	18.8	35.585	0	4.928
25.4642	25.7245	25.5778	25.7244	25.6959	25.7162	25.6044	25.6192	25.8347	25.7159	25.7753	25.7548	25.9489	25.928	25.8007	25.8729	25.9137	25.9652	26.0522	25.984	25.95	25.9599	25.8986	25.9747	25.7635	25.7942	25.955	25.7629	25.9109	25.8531					+	+	+				halfMIC_Ctrl;MIC_Ctrl;quarterMIC_Ctrl	17	17	17	42.1	42.1	42.1	43.641	0	164.6
19.9564	21.6428	19.5198	21.4024	21.9034	21.5405	21.413	19.4721	21.7273	19.2864	20.0589	19.9315	21.8313	21.3208	21.8723	21.9521	21.6871	21.9466	21.9822	21.555	21.8401	19.9972	21.7344	22.2152	19.6923	21.5573	21.484	22.0417	21.7915	22.0253												4	4	4	22.5	22.5	22.5	30.471	0	4.5728
27.8333	28.2163	28.1592	28.1532	28.263	27.9492	27.8957	27.7351	28.1721	27.9932	27.9331	28.1663	27.8728	27.7703	27.6328	27.6544	27.7154	27.6018	27.7593	27.817	27.9191	27.8933	27.76	27.844	27.7303	28.0979	27.987	27.7538	27.9779	28.0001						+	+				halfMIC_Ctrl;MIC_Ctrl	11	11	11	54	54	54	14.718	0	65.39
24.3714	24.2585	24.3036	24.3335	24.4078	24.2409	24.1939	24.0969	24.3635	24.1524	24.5477	23.8819	23.961	23.9834	23.9785	24.0542	24.0234	24.2379	23.9149	23.4902	23.9914	23.7266	24.1954	24.2634	24.0442	24.3238	24.153	24.2239	24.0788	24.2658					+	+	+				halfMIC_Ctrl;MIC_Ctrl;quarterMIC_Ctrl	6	6	6	78.5	78.5	78.5	15.542	0	103.93
22.2374	22.6015	22.5597	22.7601	22.5382	22.2557	22.5541	22.4228	23.1861	22.6223	22.7682	22.4129	22.9169	22.7731	22.881	22.7513	22.7894	22.8322	22.7012	22.8329	22.5344	22.6714	22.7788	22.8541	22.4936	22.5203	22.695	22.7622	22.7889	22.7844						+	+				halfMIC_Ctrl;MIC_Ctrl	5	5	5	30.8	30.8	30.8	29.698	0	43.136
22.6302	22.9236	22.4477	23.1877	23.1263	23.2305	22.595	22.539	22.7971	22.9227	22.864	22.8128	22.7781	23.0278	23.3307	23.3083	22.9969	23.1079	23.0153	23.0232	22.9351	23.2953	23.0832	22.9905	22.6787	22.9447	22.9353	23.0041	23.0265	22.8376												8	8	8	33.3	33.3	33.3	38.591	0	18.243
26.9414	27.4394	26.9761	27.4849	27.6124	27.2536	27.4417	27.2032	27.4594	27.4726	27.5375	27.4454	27.7399	27.6009	27.6302	27.775	27.6779	27.7746	27.5994	27.6812	27.5867	27.7816	27.7334	27.7011	27.376	27.7739	27.652	27.4448	27.6732	27.501						+	+				halfMIC_Ctrl;MIC_Ctrl	25	25	25	56	56	56	49.822	0	238.78
24.8778	25.2845	25.09	25.1043	25.4654	25.1719	25.0992	25.1831	25.3092	25.3845	25.2648	25.3943	25.4383	25.3909	25.3246	25.4282	25.2232	25.5494	25.4061	25.4568	25.3897	25.3363	25.4466	25.4229	25.1555	25.4983	25.5	25.34	25.4557	25.4939					+	+	+				halfMIC_Ctrl;MIC_Ctrl;quarterMIC_Ctrl	17	17	17	47	47	47	48.979	0	154.14
20.9277	21.0354	21.0474	20.8492	20.928	20.8762	20.6836	20.5844	21.1011	20.7516	20.5416	21.2003	20.9001	20.7471	20.7302	20.7062	20.7855	20.5687	20.9363	19.7426	20.9569	20.8325	21.0035	21.1	20.8096	20.8298	20.8422	20.6514	21.004	20.9925						+					halfMIC_Ctrl	3	3	3	32.1	32.1	32.1	14.964	0	12.781
23.2959	23.7104	23.2138	23.4589	23.695	23.5256	23.7764	23.469	23.4571	23.5836	23.6769	23.5976	23.8337	23.8057	23.9072	23.7461	23.7233	23.8352	23.8853	23.8095	23.764	23.828	23.9481	23.7874	23.5857	23.8488	23.8603	23.5895	23.7724	23.783					+	+	+				halfMIC_Ctrl;MIC_Ctrl;quarterMIC_Ctrl	9	9	9	42.7	42.7	42.7	32.865	0	92.862
21.4075	21.6658	21.4008	22.0777	21.6783	20.4242	21.3566	20.9772	20.3593	21.0085	21.4669	21.5176	21.9421	21.6349	18.3342	21.8667	22.2216	21.6044	21.6564	20.9002	22.5077	22.7905	22.3066	21.7005	21.1012	22.0006	21.6155	21.6667	21.4943	20.1525												3	3	3	23.1	23.1	23.1	15.765	0	3.4487
22.8992	23.3934	23.1835	23.4405	23.6293	23.1092	23.0532	22.6962	23.2379	23.2872	23.1897	23.2366	23.4711	23.2678	23.29	23.1618	23.2206	23.4483	23.4482	23.4057	23.1264	23.5767	23.5904	23.1182	23.1287	23.155	23.3019	22.935	23.324	23.0872												9	9	9	25.5	25.5	25.5	54.128	0	52.464
24.198	24.7107	24.3566	24.7911	25.0512	24.4427	24.7303	24.4088	24.9237	24.9027	24.8257	24.78	25.3122	25.0171	25.3156	25.2707	25.1554	25.2414	25.2693	24.9717	25.0882	25.3072	25.1521	25.2134	24.8327	25.2271	25.1952	24.9025	25.2031	25.149					+	+	+				halfMIC_Ctrl;MIC_Ctrl;quarterMIC_Ctrl	9	9	9	46.8	46.8	46.8	23.738	0	94.111
19.9817	20.4969	20.5005	20.4298	20.298	20.843	20.5822	20.5449	20.7967	20.5023	20.6496	20.3572	20.8055	20.5392	19.9008	19.7962	19.4278	20.6942	20.8135	20.5939	20.0957	20.7341	20.9884	20.5012	19.9203	20.6616	19.5913	20.594	19.5607	20.5322												2	2	2	17.4	17.4	17.4	28.463	0	17.299
27.595	27.7919	27.7029	27.8434	27.8968	27.6702	27.8256	27.6524	27.8792	27.8627	27.8984	27.7847	27.8605	27.8286	27.9378	27.9664	27.8825	27.9579	27.8497	27.8455	27.8415	27.9784	27.9247	27.9191	27.6917	27.9309	27.8607	27.8362	27.9329	27.8316						+	+				halfMIC_Ctrl;MIC_Ctrl	37	37	37	74.5	74.5	74.5	56.719	0	323.31
25.663	25.4467	25.1524	24.7419	24.3003	25.1979	25.0419	25.6578	24.9959	25.417	25.1801	25.8613	24.5978	24.5206	24.2559	23.955	24.2063	24.1308	23.7192	24.0217	23.4564	23.9442	23.3426	23.203	25.8976	24.329	24.6448	24.992	24.3729	24.6232						+	+				halfMIC_Ctrl;MIC_Ctrl	5	5	5	58.4	58.4	58.4	8.5493	0	53.381
21.6491	21.8167	20.6224	21.6024	22.1792	21.8705	22.0459	21.7573	22.0443	22.0714	21.7382	21.6259	22.1378	21.8308	21.5212	21.3264	21.6357	21.585	21.8181	21.7846	21.7373	21.798	21.8282	21.8073	21.6915	22.3509	22.1723	21.592	22.0178	21.9544												5	5	5	30.9	30.9	30.9	19.572	0	31.811
19.7297	19.8849	19.9267	20.9839	20.136	20.6327	20.3663	20.6117	20.889	20.6993	19.7123	20.7859	20.9461	20.4064	21.0289	18.6338	20.8847	20.7556	20.8286	20.8571	19.8312	21.0313	21.1966	21.0708	21.049	20.4634	21.0026	20.3519	20.6827	20.5251							+				MIC_Ctrl	3	3	3	16.7	16.7	16.7	24.887	0	6.9777
22.0396	22.106	21.9178	22.2359	22.3354	22.0375	22.0207	22.0552	22.4731	22.1374	22.5306	22.1714	22.4301	22.4118	22.342	22.5442	22.5308	22.6223	22.4698	22.5512	22.5541	22.4212	22.5069	22.4648	21.8474	22.3452	22.4648	22.333	22.4234	22.2648						+	+				halfMIC_Ctrl;MIC_Ctrl	7	7	7	26.5	26.5	26.5	47.655	0	58.883
22.2225	22.7378	22.2218	22.5261	22.6842	22.4163	22.3564	22.4932	22.4593	22.3537	22.4094	21.8855	22.5978	22.7934	22.6461	22.8555	22.7838	22.7661	22.5816	22.425	22.5124	22.8589	22.8494	22.8356	22.3367	22.6053	22.6861	22.5776	22.7692	22.4012						+					halfMIC_Ctrl	4	4	4	22.2	22.2	22.2	28.758	0	24.895
28.0124	28.6	28.3216	28.5957	28.6142	28.5681	28.4681	28.0287	28.426	28.2827	28.4713	28.2337	28.6144	28.5386	28.588	28.6686	28.4985	28.7824	28.7345	28.5731	28.5422	28.5886	28.7432	28.9104	28.0214	28.6401	28.5802	28.3097	28.5574	28.4285							+				MIC_Ctrl	12	12	12	74.4	74.4	74.4	22.711	0	181.26
24.8274	25.3714	24.9514	25.4862	25.639	24.9685	25.3009	25.0504	25.4274	25.4441	25.4699	25.5774	25.5902	25.5175	25.3991	25.2764	25.4974	25.5216	25.3092	24.9136	25.057	24.9571	25.2567	25.3852	25.0462	25.7463	25.6552	25.2535	25.7334	25.3832												10	10	10	69.5	69.5	69.5	19.547	0	40.26
20.0003	21.2995	21.0092	20.7859	21.3031	20.1582	19.9027	19.631	19.9216	19.4764	21.6028	21.1999	19.717	20.2147	20.182	21.5045	21.1349	21.0842	20.9948	20.9424	19.9523	20.3583	20.9827	20.9955	20.8579	20.8289	20.6334	20.1867	20.1925	19.722												5	5	5	21.7	21.7	21.7	33.11	0	5.8528
23.1658	23.4506	23.32	23.373	23.5766	23.4898	23.2334	23.2562	23.3369	23.4664	23.3065	23.3318	23.8455	23.4331	23.6545	23.8611	23.6687	23.7178	23.615	23.7941	23.7223	23.7172	23.9465	23.6804	23.1159	23.6183	23.6871	23.351	23.6215	23.5101						+	+				halfMIC_Ctrl;MIC_Ctrl	9	9	9	50.2	50.2	50.2	31.534	0	25.912
24.8666	24.8111	25.0366	24.8973	24.9481	24.6868	24.9753	24.8143	24.8223	25.127	24.9133	25.0601	24.9155	25.1246	25.0039	25.1268	25.0701	25.0409	25.1812	25.0319	25.0946	25.2134	25.2212	24.9401	24.8903	24.9623	25.0317	24.9858	24.9715	24.901						+	+				halfMIC_Ctrl;MIC_Ctrl	8	8	8	44.8	44.8	44.8	17.798	0	47.29
21.7137	20.0137	21.3231	21.6238	21.5141	21.2795	20.313	20.1591	21.5295	21.5618	21.5948	19.111	21.5595	22.1319	21.5565	21.7269	20.2825	21.8711	21.8474	21.7719	20.9309	22.0058	21.4622	21.7128	22.107	21.635	21.4181	21.7458	21.7745	21.443												5	5	5	22.9	22.9	22.9	38.209	0	11.44
22.2512	22.7327	22.6554	22.8174	22.7523	22.403	22.4643	22.2107	22.3804	22.4556	22.8175	22.4841	22.7998	22.6025	22.5557	22.6881	22.6804	22.8965	22.8476	22.7735	22.8035	22.853	22.3115	21.9865	22.3927	22.9349	22.5434	22.3799	22.5715	22.841												3	3	3	21.3	21.3	21.3	20.889	0	10.207
21.833	21.9635	21.9794	21.8117	19.6587	21.8407	20.3233	19.9246	22.1571	22.1259	21.2538	19.3227	19.9263	19.8462	19.8363	21.9502	20.0593	18.6306	22.1462	20.4372	20.2174	22.6496	21.8091	19.8113	19.4649	22.2971	22.0588	19.2363	20.7847	19.1522						+					halfMIC_Ctrl	3	3	3	42.3	42.3	42.3	12.686	0	12.338
19.4427	19.2867	20.9546	19.8118	19.8632	19.0201	21.8783	19.8361	19.6296	19.5044	19.5648	21.2351	19.6616	19.8712	19.7144	19.9265	19.7898	19.6927	19.8885	20.1001	19.8403	19.8594	19.3738	19.8437	19.8477	19.9995	19.9365	20.2886	19.8066	19.1714												3	3	3	6.6	6.6	6.6	76.174	0	9.3948
22.7882	23.2122	22.7844	22.9427	23.0514	23.0404	22.6435	22.6207	22.9547	22.8634	23.0286	23.0426	23.1631	23.269	23.428	23.3881	23.1221	23.144	23.0357	22.8673	23.2296	23.7447	23.3636	23.3094	22.7404	23.2047	23.1777	23.122	23.1634	22.6646						+	+				halfMIC_Ctrl;MIC_Ctrl	3	3	3	17.2	17.2	17.2	19.732	0	28.54
23.1823	23.6715	23.3209	23.2031	23.5374	22.6674	23.1423	23.5028	23.368	23.803	23.289	23.593	24.0319	23.9515	24.161	23.9488	24.0356	24.1062	23.8959	24.0261	23.6195	23.904	24.1663	23.7183	23.6746	23.703	23.8817	23.2216	23.637	23.8849					+	+	+				halfMIC_Ctrl;MIC_Ctrl;quarterMIC_Ctrl	2	2	2	27.1	27.1	27.1	11.048	0	12.867
22.3873	22.2267	22.4098	22.2378	22.296	21.9404	22.3426	22.2074	22.1132	22.5369	22.3254	22.6843	22.4825	22.5757	22.1168	22.0421	22.1748	22.4841	22.2656	22.1537	22.9374	22.3111	22.0941	22.3316	22.2032	22.4903	21.6696	21.9613	22.4261	21.8461												3	3	3	34.7	34.7	34.7	16.697	0	28.226
21.4245	21.4205	21.4582	21.5649	21.7114	20.268	19.2972	21.1591	21.3805	21.3037	21.2044	21.0335	21.2442	21.2714	20.1743	19.0111	20.9159	21.4455	21.6178	21.5497	19.5717	22.5431	20.4273	20.4362	21.2726	21.4466	20.4945	21.3407	19.6521	20.023												3	3	3	18	18	18	29.522	0	29.186
27.996	28.4221	28.141	28.4013	28.5205	28.1893	28.4068	28.1723	28.4197	28.479	28.4507	28.3315	28.5287	28.6174	28.7196	28.6565	28.5606	28.6632	28.5868	28.4761	28.4995	28.6204	28.5829	28.6717	28.3637	28.5304	28.5417	28.4652	28.625	28.4626					+	+	+				halfMIC_Ctrl;MIC_Ctrl;quarterMIC_Ctrl	11	11	11	68.8	68.8	68.8	20.976	0	313.45
23.615	23.486	23.4847	23.6758	23.8671	23.7343	23.6848	23.3727	23.7042	23.5822	23.571	23.4448	23.5136	23.8215	23.6958	24.0337	23.7428	23.8312	23.673	23.5951	23.7701	23.7951	23.8573	23.9125	23.5099	23.8893	23.6822	23.8304	23.6434	23.6291												7	7	7	42.4	42.4	42.4	37.927	0	42.823
21.5872	22.3316	21.2964	21.9233	22.1161	21.3323	21.4358	21.1978	21.7632	21.6673	21.7826	21.5161	22.3637	21.9458	21.9349	22.0947	22.0531	22.2444	21.9956	21.7149	22.0244	21.7282	22.575	21.8776	21.6379	22.3443	22.3001	21.6617	21.9845	22.1912												5	5	5	32	32	32	27.443	0	10.977
23.7579	22.9004	23.7366	23.5242	23.6779	24.36	23.6681	23.4505	23.3992	23.1165	23.4117	23.6218	23.8517	23.4991	23.9141	23.6276	23.8824	23.8265	23.8763	23.8806	23.8121	24.0223	23.8567	23.7512	23.6239	23.6778	23.7038	23.2109	23.5972	23.3745												8	8	8	38.4	38.4	38.4	31.881	0	21.197
24.691	24.6074	24.6282	24.7468	24.8354	24.6088	24.5976	24.5187	24.7217	24.6687	24.652	24.6671	24.6956	24.7503	24.5393	24.577	24.7187	24.7992	24.7016	24.6121	24.5886	24.7157	24.6183	24.6241	24.5748	24.6425	24.697	24.6625	24.7928	24.7606												20	20	20	39	39	39	72.539	0	65.487
19.8949	20.8273	19.9275	21.0852	20.3864	19.212	21.0643	21.0465	20.3333	20.9178	20.6674	19.5703	20.0353	21.263	21.236	21.3109	21.1139	19.8381	20.0832	20.9279	19.555	19.2723	20.753	20.906	19.1938	21.3977	21.068	21.2339	19.9888	21.151												4	4	4	10.4	10.4	10.4	70.967	0	12.788
26.7833	27.074	26.84	27.0801	27.2594	27.1219	27.2108	26.8991	27.1772	27.1199	27.2443	27.0634	27.2782	27.3345	27.3958	27.4291	27.3043	27.4386	27.3124	27.1561	27.2431	27.3818	27.3787	27.4006	27.1265	27.3525	27.3516	27.1557	27.3634	27.2475					+	+	+				halfMIC_Ctrl;MIC_Ctrl;quarterMIC_Ctrl	25	25	25	63.6	63.6	63.6	56.288	0	323.31
25.5822	25.8803	25.7561	25.8406	26.1265	25.7531	25.9807	25.6095	26.0355	26.0087	25.9958	25.9163	26.0718	26.0521	26.0657	26.0943	26.004	26.0399	26.0894	26.0001	25.9712	26.1549	25.9712	26.1896	25.8097	26.0291	26.0717	25.7791	26.1097	25.9434						+	+				halfMIC_Ctrl;MIC_Ctrl	10	10	10	37	37	37	33.635	0	220.21
22.149	21.4864	21.7638	21.9941	21.9878	22.0279	21.7722	19.5494	22.2346	21.9163	21.9013	21.5201	22.056	20.1422	21.9697	22.1215	22.0694	22.0591	22.2247	21.9908	21.9343	22.397	22.1209	20.1462	21.8688	22.0811	22.3411	21.7153	22.1375	22.3825												4	4	4	30.6	30.6	30.6	20.439	0	10.1
25.0186	24.997	25.4537	24.8477	24.5408	24.6233	25.0885	25.4752	24.7547	25.0667	24.7504	25.5144	24.9799	24.9885	24.6373	24.4352	24.3752	24.1791	24.3905	24.8889	24.6093	23.7232	23.4037	23.8807	26.0864	24.5967	24.801	25.295	24.5536	24.8184							+				MIC_Ctrl	8	8	8	59	59	59	13.135	0	15.204
19.9401	21.6034	20.3611	21.1911	20.9559	19.3655	20.3574	18.8557	20.3937	20.3237	20.6223	20.2737	20.0194	20.3456	20.0579	19.9343	20.2569	20.1624	20.7242	20.5722	20.0467	20.6896	19.7534	20.4416	20.5601	20.6926	20.5119	20.5627	20.701	19.3056												5	5	5	13.8	13.8	13.8	49.261	0	3.9837
22.2525	22.0905	22.2557	22.2639	22.5101	23.3832	22.788	22.3386	22.0065	22.3	22.6057	19.6685	22.4268	22.5831	22.7787	23.0537	22.5874	22.6589	22.8295	22.8884	22.8578	22.8829	22.6635	22.9023	19.9259	22.1782	22.7667	18.8943	22.86	22.4796												6	6	6	44.9	44.9	44.9	19.041	0	23.614
21.1832	21.9903	20.7922	19.9583	21.9251	20.689	19.7523	19.6741	21.25	21.9975	21.2346	19.3817	22.4612	19.7384	22.1055	22.2889	22.1155	20.1796	19.951	20.5411	22.0826	22.0165	22.1033	22.4079	21.7682	21.9733	21.9204	21.0978	21.8912	20.111												4	4	4	26.1	26.1	26.1	25.701	0	25.98
26.3908	26.4957	26.3794	26.5435	26.5562	26.6326	26.6599	26.431	26.606	26.5299	26.6158	26.4792	26.5477	26.5892	26.6119	26.7421	26.7166	26.6761	26.5643	26.5096	26.5697	26.7297	26.5766	26.6688	26.5541	26.6062	26.6179	26.6065	26.6053	26.5174						+	+				halfMIC_Ctrl;MIC_Ctrl	21	21	21	51	51	51	56.942	0	261.39
22.7927	21.9417	19.8269	21.7993	19.5689	19.4655	20.04	23.0536	21.0304	20.3214	22.9327	22.9161	22.0238	22.386	22.3129	20.91	20.7404	21.6349	22.0076	22.924	22.7981	21.6574	21.4131	22.2072	22.3305	22.4351	20.1612	22.6715	21.8725	19.5534												2	2	2	7	7	7	34.813	0.00091996	2.674
20.3664	21.761	20.0683	22.0129	21.7888	21.9576	21.633	20.7028	21.8492	19.7494	20.1818	20.9633	21.589	21.7065	21.3254	21.6012	21.6532	18.7223	21.6209	20.5376	21.7094	21.7642	21.5938	21.9866	19.8816	21.6434	21.8537	21.644	21.7217	21.4789												5	5	5	30.1	30.1	30.1	27.717	0.009322	1.4501
21.8629	21.9069	21.8647	21.8873	21.8227	22.1375	22.0081	19.8332	21.8135	22.0971	22.042	21.5799	22.1571	21.8475	22.0859	22.1185	22.5691	22.3829	21.6928	22.823	22.1553	22.2765	21.4708	22.3279	22.3169	22.0853	21.9617	21.9981	22.3575	21.854						+					halfMIC_Ctrl	3	3	3	19.4	19.4	19.4	26.95	0	11.497
23.3194	24.0731	23.4528	23.5805	23.6459	23.7275	23.7251	23.3475	24.0132	23.8103	24.0493	23.7262	23.8808	24.0181	24.0045	24.059	24.1501	24.1384	24.1351	24.2982	23.9437	24.4381	24.3132	24.0729	23.5967	24.1512	24.1951	23.7846	24.1257	23.875						+	+				halfMIC_Ctrl;MIC_Ctrl	18	18	18	28.3	28.3	28.3	105.34	0	65.262
24.9593	24.9329	25.0107	25.1046	25.1885	24.9437	24.9506	24.7748	25.0107	24.9784	25.14	24.9055	25.1104	24.8933	25.0343	25.0951	24.7798	25.1457	25.0453	25.1914	25.1825	25.1991	24.9551	25.0889	24.9476	25.032	24.9302	24.9984	25.0383	25.0798												13	13	13	46.9	46.9	46.9	40.349	0	135.39
21.9127	21.5565	22.1212	21.5708	22.6537	23.5838	22.4013	21.7473	21.6732	21.8089	21.9373	21.8807	21.6593	20.9729	21.5048	21.7563	21.2934	21.4288	21.9491	21.4117	21.5912	21.5527	21.7966	21.7784	21.5454	21.9002	21.6707	21.4099	21.6806	21.4746						+					halfMIC_Ctrl	5	5	5	19.2	19.2	19.2	33.264	0	6.9538
24.6695	24.7224	24.8295	24.8215	24.9337	24.7499	24.6898	24.6712	24.9605	24.9223	24.9581	24.9157	25.0507	24.9895	25.0301	25.0909	24.951	25.0671	24.9622	25.0278	25.2227	25.4316	25.2303	25.0077	24.77	24.9666	24.856	24.955	25.0444	25.0597					+	+	+				halfMIC_Ctrl;MIC_Ctrl;quarterMIC_Ctrl	6	6	6	57.9	57.9	57.9	16.221	0	197.94
23.5739	24.0186	23.8556	24.0464	24.2347	23.8266	23.8127	23.5769	23.9452	23.8339	23.9159	23.8492	24.2334	24.0445	23.9656	23.9363	24.0961	24.1356	24.1473	23.7358	23.79	24.0931	24.0658	23.9733	23.6994	23.7301	24.1558	23.7583	24.2479	23.9424												8	8	8	41.6	41.6	41.6	30.644	0	140.9
20.2994	20.8367	20.7276	20.559	20.9186	20.0039	20.5819	20.3782	19.4256	19.9194	20.7723	20.7545	20.8099	20.8581	20.4478	20.1984	19.6268	18.7229	20.6075	20.694	21.1294	20.64	20.6476	20.8578	20.5781	20.4568	20.6592	20.5586	20.8612	20.5781												2	2	2	9	9	9	31.471	0	17.907
21.2186	20.879	20.926	21.0049	21.0671	21.167	20.7911	19.6926	21.0385	21.0433	21.2492	21.0666	21.1231	21.071	20.7626	21.0843	21.0054	21.2076	20.3285	21.1604	20.9577	21.2465	21.1415	21.4588	21.0595	21.0829	19.5888	21.1769	21.0682	21.1428												2	2	2	18.8	18.8	18.8	19.928	0	8.0682
24.8224	25.0322	25.2604	25.171	25.2087	24.8387	25.1319	24.9841	25.1694	25.1773	25.0942	25.2841	25.3157	25.268	25.1378	25.1163	25.1465	25.0514	25.1019	25.1563	25.3046	25.1056	25.0401	25.2699	25.1795	25.4151	25.1386	25.1608	25.2092	25.1255												8	8	8	31.4	31.4	31.4	38.451	0	92.422
25.939	26.1818	25.9792	26.2122	26.4095	26.225	26.1432	25.894	26.1149	26.1168	26.2056	25.9804	26.3821	26.2847	26.3099	26.3863	26.3396	26.387	26.2322	26.2023	26.2763	26.4593	26.2564	26.3339	26.0637	26.3298	26.2742	26.2209	26.2784	26.2514						+					halfMIC_Ctrl	27	27	27	50.2	50.2	50.2	79.535	0	323.31
22.5958	23.0688	23.0497	23.0781	23.1143	23.0155	22.8791	22.6966	23.1249	22.9848	22.9573	22.661	23.1487	23.2911	23.0836	23.3649	23.2257	23.2605	23.2153	23.1287	23.0092	23.4853	23.306	23.3214	23.0255	23.088	23.1071	23.2845	23.2358	23.1929						+	+				halfMIC_Ctrl;MIC_Ctrl	9	9	9	26.4	26.4	26.4	38.77	0	49.573
19.1749	21.4583	21.2282	21.9358	21.6835	21.2201	21.0278	20.6626	21.0851	19.4375	21.0564	20.6958	20.7157	20.565	20.5902	20.786	20.8525	20.9767	19.2712	21.2135	21.0931	22.4485	20.9797	21.1539	20.7586	20.9648	20.8023	20.3475	20.8348	18.2941												3	3	3	38.3	38.3	38.3	11.208	0	35.603
20.4108	20.374	19.7115	19.8308	20.3475	20.1738	19.8438	20.5014	20.3652	20.9207	20.4982	19.8982	20.5001	19.8522	19.547	17.7734	20.5324	20.8358	20.6884	20.4363	20.5159	20.2685	21.0294	20.8351	20.316	20.7808	20.9235	20.8947	20.5856	19.5142							+				MIC_Ctrl	3	3	3	12.3	12.3	12.3	34.624	0	13.503
22.4159	22.1049	22.6793	22.5547	22.3098	22.7121	22.6109	22.3338	22.3603	22.3593	22.3138	22.1611	22.1508	22.3871	22.5402	22.4688	22.0544	22.4996	22.5237	22.5922	22.3361	22.406	22.7556	22.5266	22.4684	22.3252	22.21	22.4308	22.1316	22.2935												8	8	8	25	25	25	61.779	0	34.608
25.4687	25.7244	25.4427	25.7611	25.755	25.6718	25.7457	25.5768	25.745	25.7518	25.8554	25.5682	25.9364	25.8811	26.0402	25.9866	25.9308	26.1001	26.0091	25.8912	25.8085	26.1353	25.9916	26.1278	25.7012	25.845	25.961	25.7446	25.9346	25.734					+	+	+				halfMIC_Ctrl;MIC_Ctrl;quarterMIC_Ctrl	16	16	16	45.5	45.5	45.5	49.716	0	263.36
24.6624	24.8694	24.4902	24.9237	25.0005	24.8331	24.8896	24.6638	24.9644	24.843	25.035	24.8991	24.9571	24.9854	25.1113	25.1105	25.0245	25.1192	24.9348	24.9517	24.994	25.2525	25.1863	25.0304	24.8463	25.0729	24.9915	25.0028	24.9775	24.887						+	+				halfMIC_Ctrl;MIC_Ctrl	27	27	27	52.7	52.7	52.7	99.194	0	172.38
22.7285	22.6435	23.5593	22.1988	22.8136	22.0528	22.7598	23.1091	22.6226	22.9547	22.5511	23.425	22.6918	22.7297	22.6087	22.0968	22.5064	22.2043	22.1426	23.1135	23.0245	22.7297	22.731	22.2048	23.2044	23.0775	22.654	22.7664	22.5406	22.656												5	5	5	33.6	33.6	33.6	14.803	0	25.826
17.3736	19.9774	20.1766	20.1546	18.9426	21.8789	18.6982	19.9154	19.1017	18.2066	20.1139	18.6613	20.3024	17.5546	19.8481	21.5226	19.4591	18.3845	21.6976	20.3925	20.3681	17.268	18.8225	19.5583	20.2399	18.01	19.1043	19.8611	19.8594	20.5946												2	2	2	4.4	4.4	4.4	40.665	0	25.236
25.39	25.6517	25.602	25.8429	25.5675	25.3164	25.41	25.4632	25.5233	25.5826	25.5664	25.3504	25.6285	25.5695	25.6112	25.4904	25.7339	25.8123	25.583	25.2532	25.5025	25.3806	25.6948	25.779	25.3395	25.714	25.6999	25.4155	25.6966	25.7462												6	6	6	47	47	47	13.669	0	193.5
20.8329	22.9083	22.4965	23.0523	22.7508	22.6168	22.7127	22.7308	22.7351	22.75	22.8916	22.6703	23.0982	22.9312	22.9882	23.5033	22.9603	23.1103	22.8523	22.6985	23.1992	23.0623	23.2696	23.028	22.7057	23.1471	23.0118	22.7133	23.02	22.7638						+					halfMIC_Ctrl	6	6	6	44.6	44.6	44.6	26.511	0	34.194
22.6842	22.8063	23.1941	22.9882	22.7708	23.1395	22.6891	23.0306	22.9434	19.2189	23.2815	22.9355	22.1648	22.6772	23.2914	23.3339	23.0053	23.1608	22.8434	23.0398	21.8597	23.4387	23.0543	23.3791	22.8361	19.4879	23.0823	22.9952	22.892	22.5915												4	4	4	22.8	22.8	22.8	23.541	0	14.999
28.6006	28.4736	28.4443	28.3196	28.2267	28.4333	28.277	28.461	28.5013	28.3847	28.3407	28.1049	27.9136	28.0713	28.0773	28.3249	27.9498	28.2063	28.0684	28.1282	28.0404	27.9009	27.9814	28.1642	28.7228	28.0598	28.1439	28.234	28.0969	28.4107						+	+				halfMIC_Ctrl;MIC_Ctrl	14	14	14	92.1	92.1	92.1	13.31	0	323.31
23.905	24.1448	23.9467	24.3067	24.293	24.2672	24.0791	23.8616	24.1976	24.0989	24.1517	23.9957	24.2925	24.2708	24.3085	24.3927	24.3234	24.351	24.2674	24.489	24.3158	24.5517	24.2736	24.7596	23.9748	24.2992	24.1796	24.1193	24.2606	24.1701						+	+				halfMIC_Ctrl;MIC_Ctrl	7	7	7	55.2	55.2	55.2	19.117	0	207.52
21.002	19.777	21.0058	20.0615	20.4105	20.2415	20.1018	20.9075	20.3026	20.4505	19.1404	19.8709	20.3377	20.4146	20.9165	20.6919	19.3382	20.7144	20.5361	20.7258	20.4488	20.0938	20.8039	20.1302	20.3503	20.3089	20.5425	20.2345	20.711	20.8455												2	2	2	16.5	16.5	16.5	15.354	0	4.861
23.1604	23.3525	23.3615	23.4429	23.6293	23.2051	23.2758	23.2057	23.3184	23.3721	23.2023	23.3691	23.17	23.3153	23.335	23.3973	23.4382	23.3385	23.3514	23.2607	23.3516	23.4689	23.5874	23.458	23.2472	23.4783	23.4048	23.3453	23.4015	23.4621												11	11	11	44.7	44.7	44.7	31.44	0	26.714
19.1553	17.6051	17.9376	17.7871	17.6595	19.5692	17.0606	19.9422	17.3552	17.377	17.2959	17.6745	17.4048	19.7217	17.8622	17.1559	19.4037	17.295	21.4241	20.5424	17.7845	20.8244	20.0774	17.3201	19.7954	17.6477	16.4666	21.4243	17.3553	16.4855												3	3	3	25	25	25	13.798	0.010067	1.3238
22.2707	22.3499	21.828	22.3262	22.5067	22.3005	22.4245	22.0999	22.704	22.2995	22.3244	22.3852	22.3765	22.5813	22.3324	22.8337	22.2969	22.6577	22.6815	22.4945	22.5405	22.5531	22.6281	22.6607	22.3396	22.621	22.6528	22.4193	22.5337	22.2785						+	+				halfMIC_Ctrl;MIC_Ctrl	7	7	7	26	26	26	46.8	0	21.01
25.3383	25.7749	25.4993	25.66	25.8348	25.7126	25.7038	25.5403	25.8278	25.7306	25.8652	25.6328	25.8452	25.8079	25.8509	25.956	25.8049	25.9526	26.0271	25.9826	26.0599	26.2363	26.0795	26.1661	25.5728	25.8407	25.7908	25.718	25.8259	25.7562						+	+			+	halfMIC_Ctrl;MIC_Ctrl;MIC_halfMIC	19	19	19	77.3	77.3	77.3	34.674	0	215.22
23.7752	24.1809	23.9035	24.3314	24.3528	24.1309	24.1999	24.105	24.2407	24.0705	24.534	24.1417	24.4594	24.5921	24.4962	24.6028	24.6664	24.5166	24.4618	24.4803	24.3603	24.5575	24.5128	24.5911	24.2148	24.5377	24.5491	24.3264	24.4294	24.3202					+	+	+				halfMIC_Ctrl;MIC_Ctrl;quarterMIC_Ctrl	7	7	7	34	34	34	27.945	0	52.295
22.4415	22.7893	22.2189	22.6258	22.7238	22.3186	22.7194	22.4615	22.7062	22.6373	22.726	22.4373	22.8751	22.6655	22.6431	22.6361	22.6521	22.8278	22.7563	22.3514	22.444	22.8038	22.8851	22.8361	22.662	22.7291	22.9088	22.549	22.8666	22.513						+					halfMIC_Ctrl	6	6	6	31.8	31.8	31.8	33.401	0	44.656
26.5318	26.7532	26.7514	26.8529	27.0054	26.8088	26.7321	26.6598	27.0068	26.895	26.9763	26.8777	27.014	26.9957	27.0672	27.032	27.0076	27.0925	27.0144	26.9716	26.9367	27.0671	26.9857	27.2215	26.7308	26.9682	27.0136	26.9148	26.9584	26.9964						+	+				halfMIC_Ctrl;MIC_Ctrl	19	19	19	52.4	52.4	52.4	48.548	0	219.34
22.0528	22.2024	22.0249	22.0125	21.6966	21.8632	21.6437	21.9395	22.2735	21.7797	21.6821	21.9164	21.9104	21.807	21.8169	22.0685	21.7126	21.8919	22.1877	21.9291	21.9329	21.8148	22.1325	21.6603	22.2611	21.8294	21.85	21.8672	21.8726	21.8775												4	4	4	27.1	27.1	27.1	15.339	0.0017921	2.2625
21.5834	21.6746	20.1409	21.4729	21.5831	21.2338	19.8658	21.8361	22.2295	21.9641	22.0836	21.9671	22.2379	22.1782	22.5124	22.6995	22.3005	22.5061	22.4273	22.2564	22.1675	22.156	22.4333	22.4342	22.1447	21.8151	21.9703	21.8459	22.1709	22.0956					+	+	+				halfMIC_Ctrl;MIC_Ctrl;quarterMIC_Ctrl	3	3	3	14.6	14.6	14.6	37.762	0	75.561
20.4757	23.4784	22.9769	23.4576	23.3681	21.5765	20.0548	19.9864	23.3944	19.2459	23.7404	23.6931	19.7745	24.1259	20.3927	18.5522	19.3477	24.1084	20.1201	23.8483	24.2719	23.8341	23.3499	23.9155	19.9419	19.9572	24.1529	23.646	19.3264	23.879												2	2	2	25.8	25.8	25.8	13.273	0	6.2759
25.4861	25.882	25.7373	25.9603	25.9745	25.8673	25.7508	25.5915	25.8066	25.7666	25.8483	25.7143	25.8122	25.8683	25.7658	26.0264	25.852	25.9026	25.908	25.7561	25.8097	25.8577	25.8619	25.9733	25.7872	25.7498	25.779	25.7134	25.8089	25.8041												30	30	30	51.5	51.5	51.5	80.934	0	317.34
24.4833	24.8292	24.6411	24.8819	24.8562	24.706	24.801	24.6159	24.7628	24.8612	24.9559	24.8024	24.9567	24.9	25.1168	25.0622	24.978	25.1268	25.0387	25.031	24.8921	25.2976	24.9294	25.1928	24.6961	24.8893	24.9382	24.9415	24.9301	25.036						+	+				halfMIC_Ctrl;MIC_Ctrl	15	15	15	67.8	67.8	67.8	35.07	0	105.42
20.3577	20.6419	19.9541	20.052	20.3447	20.9586	19.7706	19.3988	20.1066	20.3144	20.8656	20.5039	20.5236	20.3695	21.2397	20.5913	18.8495	20.921	19.679	20.7055	20.8023	21.1065	20.8159	20.769	19.6293	20.761	20.1962	20.5415	20.1816	21.0325												3	3	3	17.9	17.9	17.9	24.937	0.0060501	1.7177
27.2041	27.0616	27.0204	27.1298	27.0576	26.9924	27.0175	26.908	27.1205	26.9956	27.2159	26.9051	26.9681	26.8939	26.9286	27.1695	26.9224	26.9885	26.9313	26.9606	26.9621	27.1325	27.0211	27.0613	26.9207	26.9715	27.0416	26.9247	27.0513	27.0624						+					halfMIC_Ctrl	34	34	34	57.5	57.5	57.5	80.425	0	323.31
24.0064	24.3261	24.3307	24.6011	24.6368	24.2357	24.0129	24.2585	24.2388	24.518	24.1953	24.3115	24.3819	24.569	24.7047	24.808	24.6763	24.8117	24.7295	24.3425	24.3946	25.0413	25.0949	24.7447	24.1695	24.5554	24.599	24.3622	24.5582	24.5419						+	+				halfMIC_Ctrl;MIC_Ctrl	8	8	8	73.1	73.1	73.1	14.844	0	119.79
20.4652	21.5637	21.7422	21.9224	22.2572	20.2237	21.8085	20.0076	21.8387	21.7456	20.0816	20.0485	22.1271	22.0095	21.7268	19.0034	21.9864	21.8075	22.2142	22.1668	22.445	22.5539	22.2896	19.006	21.8816	22.6287	22.1084	19.982	22.2211	21.8796												3	3	3	21.3	21.3	21.3	23.391	0	16.413
20.0242	20.207	20.5446	20.1765	20.2904	19.7213	19.1383	20.2698	20.2882	20.2385	19.3258	20.4065	20.4255	20.1965	20.3787	20.1277	20.038	20.2207	20.0787	20.5193	20.6599	20.2246	20.252	19.7079	20.4322	20.016	20.6913	19.6891	20.3095	20.8932												2	2	2	11.4	11.4	11.4	18.415	0.0017809	2.2005
21.9532	22.1275	21.956	22.3679	22.5853	22.4329	22.6195	22.229	22.4156	22.2931	22.1747	22.3327	22.2694	22.5354	22.3471	22.7037	22.4716	22.4404	22.1757	22.4805	22.1876	22.6534	22.5424	22.3978	22.522	22.6341	22.3077	22.8558	22.3837	22.5392					+						quarterMIC_Ctrl	6	6	6	48.8	48.8	48.8	23.301	0	11.776
19.0061	20.3162	20.8326	20.3662	20.1164	20.3098	20.933	20.1098	20.5514	20.1478	20.4731	20.1656	21.0832	20.7244	20.6747	20.4639	21.0354	20.992	20.6793	20.9969	20.459	20.257	20.7624	20.7296	20.4818	20.7851	20.7434	20.5294	20.9775	20.4662						+					halfMIC_Ctrl	3	3	3	15.5	15.5	15.5	43.021	0	67.324
22.3229	22.205	22.0836	22.4532	22.5096	22.2612	22.0325	22.2226	22.3149	22.4359	22.353	21.981	22.0538	22.0313	22.3837	22.5434	22.1518	22.3532	22.2902	22.4551	22.4505	22.3855	22.2044	22.4872	22.449	21.1034	22.4555	22.4032	22.32	22.7818												3	3	3	4.4	4.4	4.4	60.471	0	42.027
26.4877	26.9306	26.6814	26.9385	27.0251	26.9025	26.8644	26.7892	26.9917	26.9289	27.0459	26.8103	27.0989	27.0672	27.1845	27.2594	27.135	27.2373	27.1348	26.9886	27.148	27.3143	27.193	27.1785	26.8931	27.1404	27.1767	26.9959	27.1379	27.0227					+	+	+				halfMIC_Ctrl;MIC_Ctrl;quarterMIC_Ctrl	30	30	30	64.6	64.6	64.6	62.381	0	323.31
24.8986	25.035	24.7953	25.0453	24.853	25.0223	24.8005	24.6901	25.0803	24.9657	24.753	24.9804	24.9135	24.8542	24.7305	24.7618	24.6921	24.8657	25.0159	25.0705	25.1217	24.7907	24.9915	25.0711	24.7664	24.7772	24.8001	24.8806	24.7631	24.8503					+	+					halfMIC_Ctrl;quarterMIC_Ctrl	16	16	16	69	69	69	17.598	0	42.436
23.1206	23.6345	23.2309	23.585	23.5291	23.44	23.3002	23.3225	23.3669	23.3621	23.3704	23.3931	23.5381	23.5303	23.5486	23.6135	23.5859	23.748	23.6288	23.6119	23.5877	23.8061	23.741	23.6946	23.2054	23.6534	23.6741	23.4432	23.6757	23.5513						+	+				halfMIC_Ctrl;MIC_Ctrl	6	6	6	34.6	34.6	34.6	29.281	0	34.184
20.4218	20.535	20.1425	21.1903	20.7646	21.0478	20.9911	20.8042	20.9088	19.8424	20.6705	19.2415	21.0194	20.8361	19.7765	20.9001	20.9209	19.7132	20.3962	20.736	20.8566	20.8953	20.9223	21.1396	20.4011	21.4017	20.4668	18.6779	21.8109	20.7278												4	4	4	29.3	29.3	29.3	26.728	0	7.8577
25.2609	25.7314	25.5045	25.8033	25.8391	25.5559	25.7536	25.4323	25.7478	25.6896	25.8675	25.7326	25.9535	25.9336	25.8947	26.0442	25.9306	25.9786	25.8636	25.9104	26.0227	26.1294	25.9973	25.9633	25.6206	26.1259	25.9372	25.776	25.9563	25.9192					+	+	+				halfMIC_Ctrl;MIC_Ctrl;quarterMIC_Ctrl	17	17	17	73.8	73.8	73.8	31.893	0	212.12
26.0568	26.5129	26.2187	26.4626	26.6488	26.42	26.5552	26.2234	26.5393	26.5734	26.5459	26.3933	26.6865	26.6733	26.7743	26.8071	26.723	26.7812	26.6428	26.6007	26.6259	26.8973	26.6894	26.8282	26.4567	26.6835	26.7042	26.4892	26.7432	26.7074					+	+	+				halfMIC_Ctrl;MIC_Ctrl;quarterMIC_Ctrl	22	22	22	57.2	57.2	57.2	52.531	0	278.15
22.1999	22.3155	22.4882	22.6703	22.679	22.0119	22.3957	22.1481	22.5198	22.7161	22.4764	22.8134	22.8211	22.8455	22.6411	22.5922	22.7991	22.866	22.659	23.0076	22.855	23.079	22.7306	22.6459	22.5479	22.8395	22.8252	22.4058	22.7548	22.4182						+	+				halfMIC_Ctrl;MIC_Ctrl	11	11	11	40.3	40.3	40.3	37.057	0	31.525
23.6506	23.8664	23.7719	23.7118	23.8989	23.7668	23.6619	23.6286	23.7217	23.8256	23.8415	23.7385	23.8599	23.9034	23.9696	24.0016	23.8401	23.9292	23.9801	23.9201	24.1096	24.194	23.8589	24.1042	23.6749	23.962	23.7881	23.6718	23.9736	23.7753						+	+				halfMIC_Ctrl;MIC_Ctrl	19	19	19	50.9	50.9	50.9	61.173	0	89.036
21.5725	19.6048	21.5888	21.7464	20.9983	21.2041	20.7537	20.8457	20.9456	20.924	20.942	20.7399	19.0123	20.7141	20.6444	20.8441	19.987	20.8259	21.1952	20.8154	20.9625	20.8874	20.902	20.9566	20.6325	20.6459	19.5033	20.8625	20.8916	20.3407												2	2	2	29.7	29.7	29.7	8.6298	0	3.1336
21.4836	20.6983	20.3592	19.342	18.7349	20.3102	19.7877	21.1867	19.9168	20.0598	21.2945	21.034	21.153	21.0805	21.214	21.5028	21.4455	21.4544	21.2296	21.2074	21.359	21.5035	21.2147	21.5196	21.0204	18.8903	20.569	21.2931	19.966	20.066						+	+				halfMIC_Ctrl;MIC_Ctrl	2	2	2	8.3	8.3	8.3	30.172	0	3.5809
23.7836	23.8651	23.946	24.031	24.0503	23.9683	23.828	23.8941	23.8929	23.9246	23.9434	23.9451	24.0829	24.2704	24.0747	24.2603	23.8928	24.1707	24.3065	24.1557	24.2341	24.4098	24.3458	24.475	23.9072	24.1911	23.9861	24.0302	24.0979	24.1519						+	+				halfMIC_Ctrl;MIC_Ctrl	15	15	15	40.2	40.2	40.2	70.115	0	43.157
24.4795	24.6072	24.5909	24.7432	24.8843	24.567	24.6462	24.6538	24.8795	24.7508	24.7022	24.5861	24.7978	24.6994	24.7045	24.7221	24.7748	24.7719	24.947	24.8725	24.9997	24.9368	24.8433	25.0294	24.7218	24.6934	24.7324	24.7443	24.7615	24.809							+			+	MIC_Ctrl;MIC_halfMIC	13	13	13	51.9	51.9	51.9	31.871	0	113.75
19.866	19.8407	21.1777	21.6973	21.6064	19.2274	21.5228	20.4722	21.9081	19.7519	20.7794	21.5808	22.0167	22.0598	21.5642	21.931	21.9327	20.3789	21.8205	20.428	21.7499	19.679	22.1102	19.2536	18.1137	22.1365	21.7712	20.617	22.0086	19.7167						+					halfMIC_Ctrl	6	6	6	36.7	36.7	36.7	29.848	0	5.0924
20.7017	20.9001	22.337	18.8332	19.8726	18.8272	20.9951	20.8831	20.7851	20.2341	20.7259	20.5289	21.2755	20.2907	20.1256	20.5805	19.876	20.2732	20.5836	20.8956	20.5759	20.8133	20.0133	19.7137	20.7967	20.1075	20.4801	20.5939	20.6432	20.4506												3	3	3	26.6	26.6	26.6	21.847	0	7.6831
21.096	21.6395	21.2963	21.7316	21.7217	21.5098	21.7473	19.5785	21.6877	21.4758	21.4015	21.4587	21.4021	20.3619	21.3389	21.6324	21.6552	21.5013	21.5241	21.0471	20.1869	21.109	20.4086	19.7882	20.7262	21.5566	21.3929	20.2867	21.5594	21.377							+				MIC_Ctrl	3	3	3	26.3	26.3	26.3	21.99	0	3.2949
27.3918	27.4016	27.416	27.4227	27.3501	27.3497	27.2844	27.3604	27.4848	27.4629	27.5003	27.4093	27.3205	27.3545	27.3475	27.5036	27.4268	27.4359	27.3748	27.3573	27.2921	27.5711	27.3175	27.4427	27.4444	27.3885	27.4852	27.3634	27.386	27.4474												17	17	17	60.5	60.5	60.5	35.181	0	323.31
23.3863	23.6212	23.3195	23.7696	23.6961	23.4937	23.6466	23.6382	23.6964	23.4248	23.7262	23.5534	23.71	23.794	23.929	23.8803	23.8735	23.9251	23.6605	23.7952	23.7979	24.0229	24.0166	23.8598	23.4599	23.7095	23.7445	23.9492	23.8539	23.7386						+	+				halfMIC_Ctrl;MIC_Ctrl	9	9	9	30.7	30.7	30.7	46.224	0	96.211
25.0301	25.5871	25.1657	25.7192	25.816	25.2371	25.5087	25.3365	25.7062	25.6452	25.609	25.4238	26.0808	25.9196	25.7948	25.8623	25.9023	26.0054	25.9589	25.7108	25.7671	25.8006	25.9026	25.8297	25.4047	25.9163	25.9247	25.5834	25.9783	25.7078						+	+				halfMIC_Ctrl;MIC_Ctrl	7	7	7	51.6	51.6	51.6	17.921	0	98.945
26.1358	25.3029	26.4114	25.0947	24.7328	25.3602	25.1258	25.6826	25.0401	25.1716	24.7419	25.8274	24.4127	24.8897	24.165	24.3652	24.6255	24.6213	23.6884	24.5906	24.352	24.1894	23.5305	25.6828	25.7482	24.4828	24.2964	25.0524	24.3281	24.5527						+	+				halfMIC_Ctrl;MIC_Ctrl	6	6	6	56	56	56	10.322	0	20.311
27.1239	27.4797	27.2158	27.4611	27.5408	27.3669	27.2684	27.2023	27.4265	27.3267	27.391	27.2163	27.5313	27.5259	27.5159	27.6191	27.5547	27.6219	27.4961	27.3955	27.4459	27.6195	27.5283	27.4885	27.2493	27.5827	27.5655	27.3422	27.5139	27.5058						+					halfMIC_Ctrl	38	38	38	52.6	52.6	52.6	82.604	0	323.31
23.2572	23.4743	23.2624	23.351	23.6434	23.3181	23.1949	23.0666	23.4381	23.1558	23.6705	23.2737	23.5398	23.0393	23.3495	23.3559	23.2644	23.3453	23.3126	23.423	23.1673	23.0423	23.3454	23.4228	22.9774	23.0664	23.3415	23.0678	23.3194	23.2464					+						quarterMIC_Ctrl	6	6	6	36.4	36.4	36.4	17.26	0	36.661
21.7653	21.9424	21.8223	21.8618	22.7721	22.4554	19.8664	22.0986	22.5409	22.4428	22.815	20.3862	23.2162	22.9018	23.0214	23.1991	23.1137	22.8542	23.1065	23.0942	22.6477	22.7615	23.0199	20.6954	22.4849	22.8841	22.9689	22.7786	23.1398	22.7167					+	+					halfMIC_Ctrl;quarterMIC_Ctrl	2	2	2	36	36	36	9.9987	0	43.49
23.6055	23.6543	23.5259	23.7986	23.8561	23.7754	23.7836	23.3446	23.753	23.6483	23.73	23.5681	23.8413	23.8968	23.7839	24.1176	23.9246	23.9133	23.7569	23.7424	23.8678	24.1352	24.0014	24.0612	23.5484	23.9303	23.7579	23.6239	23.9204	23.8662						+	+				halfMIC_Ctrl;MIC_Ctrl	3	3	3	46.6	46.6	46.6	12.768	0	38.037
24.1887	24.4536	24.3072	24.5033	24.5073	24.4956	24.3368	24.3476	24.3489	24.3984	24.5156	24.1958	24.5124	24.6024	24.669	24.7254	24.488	24.6473	24.627	24.5644	24.598	24.6675	24.8059	24.6821	24.4047	24.4957	24.482	24.6163	24.5544	24.5326						+	+				halfMIC_Ctrl;MIC_Ctrl	16	16	16	49.3	49.3	49.3	54.104	0	147.89
21.9627	22.4198	22.0667	22.5529	21.9823	21.8139	22.126	21.7674	22.3353	21.7185	22.15	22.0042	22.1042	19.9966	22.3959	22.6413	22.9987	23.3095	22.1663	22.2855	22.1205	22.3671	22.5228	19.3494	19.554	22.7881	22.462	22.4778	19.8099	22.3052												10	10	10	5.7	5.7	5.7	273.48	0	17.739
29.1018	28.7957	29.0189	28.6861	28.7126	28.8547	28.7641	28.8408	28.7658	28.893	28.8012	28.7793	28.3636	28.6988	28.7304	28.9079	28.7664	28.6228	28.5297	28.614	28.5818	28.8371	28.3939	28.8318	28.9047	28.4117	28.5722	29.156	28.4802	28.8183							+				MIC_Ctrl	16	16	16	65.9	65.9	65.9	23.718	0	262.53
28.4907	28.6461	28.4224	28.4497	28.658	28.7871	28.7242	28.4593	28.6984	28.6359	28.7299	28.542	28.7628	28.7078	28.702	28.5523	28.7526	28.6148	28.6943	28.7735	28.6839	28.1363	28.5904	28.7506	28.531	28.8867	28.649	28.9399	28.6868	28.7244												16	16	16	71.3	71.3	71.3	30.836	0	145.13
29.2634	29.1439	29.4242	29.2785	29.1907	28.9586	29.1004	29.1778	29.0988	29.3397	29.1173	29.0858	28.8904	29.2354	29.2461	29.4291	29.1002	29.1542	29.0942	29.2238	29.4123	29.0723	29.3847	29.2935	29.3042	29.1053	29.1404	29.4668	28.9952	29.285												19	19	19	74	74	74	15.597	0	217
24.1384	24.4129	24.1635	24.4913	24.5391	24.1966	24.3996	23.9257	24.3017	24.2345	24.4188	24.1938	24.5681	24.4992	24.4649	24.4315	24.5227	24.6578	24.4969	24.2911	24.2802	24.4746	24.7174	24.3418	24.0121	24.5564	24.7492	24.2356	24.5883	24.423						+					halfMIC_Ctrl	14	14	14	55.3	55.3	55.3	38.546	0	57.061
21.5385	21.4487	21.5571	21.6796	21.6544	21.382	21.7554	21.4848	21.7158	21.5174	21.6816	21.4327	21.6051	21.6704	21.7016	21.5806	21.476	21.8209	21.9342	21.6201	21.6423	18.323	21.2248	22.0938	21.534	21.5665	21.699	21.5007	21.5421	21.6958												3	3	3	21.2	21.2	21.2	22.733	0	6.057
20.0504	21.6313	21.5622	21.6876	22.0412	21.4068	21.0932	21.6847	21.8602	21.8532	21.512	21.7508	22.1629	21.6476	21.9308	21.8395	21.966	22.2393	21.2924	21.6718	21.4445	21.7476	22.1733	22.0901	21.2463	21.4783	21.8938	21.7351	22.0357	21.9583						+					halfMIC_Ctrl	3	3	3	11.8	11.8	11.8	41.797	0	11.88
25.4258	25.621	25.6087	25.7072	25.7919	25.5603	25.5324	25.4578	25.5982	25.5735	25.6911	25.5954	25.619	25.8277	25.6725	25.9148	25.6979	25.7776	25.7611	25.7912	25.7107	25.8211	25.6977	25.6832	25.6781	25.6967	25.6036	25.8026	25.6346	25.6058						+	+				halfMIC_Ctrl;MIC_Ctrl	12	12	12	54.2	54.2	54.2	30.843	0	310.37
20.788	19.7195	20.2782	19.6491	19.5175	20.4019	20.3287	20.4582	19.1489	19.687	21.5115	21.0077	20.3546	20.0292	20.4032	20.4	19.3558	20.2132	20.2586	19.738	20.1724	20.0601	19.9769	20.471	21.2928	20.0178	20.1817	19.6218	20.5516	20.2153												4	4	4	12.5	12.5	12.5	39.816	0.00181	2.4089
22.6593	23.0666	22.6542	22.8025	22.8472	22.7167	22.7225	22.7448	22.8541	22.9013	22.8692	22.9811	23.1212	22.7871	22.9234	23.126	22.6112	23.0486	23.3828	22.883	23.1014	23.0904	23.2275	23.2644	22.8478	22.7553	22.9987	22.7349	23.2103	23.2736							+				MIC_Ctrl	10	10	10	23.2	23.2	23.2	62.458	0	12.356
21.7261	22.3462	21.9704	22.4178	22.3303	21.9106	22.4595	22.3633	22.0608	19.0237	22.1956	22.1928	22.4874	22.5439	22.6797	22.7332	22.5384	22.6238	22.5119	22.322	22.3006	22.5094	22.3372	22.3768	22.1374	22.4682	22.4519	22.3838	22.4427	22.1641						+	+				halfMIC_Ctrl;MIC_Ctrl	2	2	2	26.2	26.2	26.2	11.967	0	27.473
23.5348	23.5979	23.351	23.4306	23.7618	23.5095	23.4773	23.4209	23.7808	23.6125	23.7097	23.5358	23.9365	23.677	23.8705	24.0271	23.9186	23.8743	24.0304	23.8368	23.6948	24.1073	23.9908	24.3424	23.5628	23.861	23.9515	23.6512	23.722	23.8873					+	+	+				halfMIC_Ctrl;MIC_Ctrl;quarterMIC_Ctrl	6	6	6	46.1	46.1	46.1	30.084	0	96.212
25.6684	25.8541	25.8199	25.9142	26.0484	25.7149	25.7861	25.8205	25.8169	25.7255	25.8533	25.7648	25.8001	25.7299	25.8071	25.9545	25.7653	25.8543	25.8654	26.0891	26.1742	25.9161	26.0244	25.9809	25.885	25.8457	25.8543	25.7126	25.7718	25.8111							+				MIC_Ctrl	12	12	12	58.5	58.5	58.5	29.474	0	250.83
24.6621	24.7871	24.9158	24.7834	24.6746	24.9821	24.7152	24.8109	24.7643	24.7713	24.6984	24.8075	24.7495	24.8412	24.8378	25.081	24.7955	24.6794	24.8446	24.9294	24.9162	24.979	24.7797	24.9272	24.8311	24.7616	24.7111	25.0038	24.7212	24.8709												11	11	11	50.5	50.5	50.5	31.841	0	93.419
23.0892	23.2587	23.4596	23.3589	23.3913	22.9549	23.042	23.1876	23.3028	23.202	23.3613	22.9993	23.0508	23.1423	23.0378	23.232	22.8645	23.2707	23.0281	23.1427	23.4747	23.2581	23.2382	23.2475	23.1503	23.0945	23.0936	23.2445	23.1201	23.1158												13	13	13	25.8	25.8	25.8	82.708	0	48.419
22.8304	22.9445	22.7455	23.0419	23.0633	22.7382	22.731	22.6033	22.9002	22.9748	22.9637	22.8365	23.1793	23.288	23.1452	23.3009	23.1587	23.2405	23.1003	22.9682	22.9038	22.8457	23.0825	22.9357	22.8693	23.2733	23.266	23.2013	22.9458	23.0846					+	+				+	halfMIC_Ctrl;MIC_halfMIC;quarterMIC_Ctrl	5	5	5	28.4	28.4	28.4	23.664	0	22.381
19.1246	20.4192	20.5153	20.621	20.3511	20.3876	19.9473	19.716	19.867	20.5475	20.3769	19.8468	20.5938	20.5984	21.0446	20.7331	20.9054	21.201	21.0478	21.5534	20.8458	20.6999	20.92	20.1929	19.5904	20.9497	20.3415	20.5931	20.6158	20.6364						+	+				halfMIC_Ctrl;MIC_Ctrl	2	2	2	9.1	9.1	9.1	29.096	0	3.5874
26.2001	26.6927	26.4144	26.648	26.6736	26.5985	26.6428	26.3929	26.6847	26.614	26.7398	26.5472	26.7763	26.7515	26.8507	26.8728	26.7584	26.8785	26.7813	26.7614	26.7641	26.9717	26.9512	26.9824	26.5127	26.771	26.8143	26.599	26.673	26.6521						+	+				halfMIC_Ctrl;MIC_Ctrl	20	20	20	81.6	81.6	81.6	40.086	0	323.31
19.4453	20.8688	21.1675	19.6953	19.9023	19.4853	19.9289	19.2959	20.2729	21.7414	21.1292	20.1717	19.9734	21.6888	21.6917	21.8906	21.7775	21.7857	21.1833	21.4506	19.2823	20.907	21.9017	21.2756	19.4308	20.4541	21.8769	20.182	20.2269	19.1333						+					halfMIC_Ctrl	6	6	6	20.5	20.5	20.5	42.907	0	4.0858
22.4934	22.9816	22.5136	22.9478	23.1086	22.9149	22.809	22.4927	22.9067	22.5481	22.8679	22.8038	23.0491	22.9042	22.7503	22.8851	22.9229	22.9416	23.0528	22.8192	22.8333	23.0837	22.9235	23.015	22.3553	23.1775	23.2134	22.7676	23.1328	22.9747												8	8	8	41.1	41.1	41.1	32.298	0	51.949
19.9461	20.9226	20.9895	21.1921	21.7168	18.5135	21.3497	20	21.3535	18.4842	20.3844	18.8986	19.3073	20.7619	19.1169	21.303	19.5527	20.7129	21.3488	19.4777	21.5588	21.2964	20.6153	19.649	20.1971	21.8083	21.2446	19.7989	19.6954	19.1794												6	6	6	29.9	29.9	29.9	38.133	0	4.9049
26.2438	25.8841	27.5635	25.7343	25.4951	25.9652	27.0793	26.7969	25.7012	26.9221	25.5096	26.5457	25.0272	26.1063	24.9692	24.6415	25.9805	24.3231	24.9246	24.6581	24.8714	25.2707	24.4183	24.6654	26.9879	25.693	25.2584	26.9284	25.3223	25.8522						+	+				halfMIC_Ctrl;MIC_Ctrl	6	6	6	36.4	36.4	36.4	7.6972	0	13.166
27.1607	26.7264	27.1132	26.8017	26.5411	26.6737	26.7208	27.2524	26.715	26.5739	26.5792	26.5732	26.1971	26.3004	26.2973	26.3826	26.2592	26.1661	26.2892	26.4045	26.3211	26.0343	25.8713	26.1887	26.9485	26.2532	26.3377	26.8662	26.2856	26.4558						+	+				halfMIC_Ctrl;MIC_Ctrl	7	7	7	39.1	39.1	39.1	20.353	0	129.18
22.6347	23.2096	22.685	23.2711	23.2404	23.1603	22.8407	22.7096	23.1442	22.9154	22.9547	23.0905	23.1945	23.0547	23.0231	22.9917	22.9229	23.1952	23.2464	23.0256	22.9844	23.3692	23.5786	23.1368	22.9974	23.1398	23.1844	22.8461	22.9794	23.0524												8	8	8	52.5	52.5	52.5	22.68	0	42.899
22.7937	23.2974	22.736	23.2081	23.4661	22.9287	22.9582	22.5551	23.0435	23.1893	23.2353	22.8133	23.3362	23.4232	23.3487	23.2588	23.2519	23.2528	23.1475	23.0327	23.1623	23.3358	23.4259	22.7662	22.7768	23.1162	23.4165	22.9508	23.4458	23.1556						+					halfMIC_Ctrl	7	7	7	17.2	17.2	17.2	54.396	0	21.638
28.134	27.9267	28.112	28.1313	28.0064	27.988	27.9557	27.9367	28.169	28.059	28.0969	27.837	28.004	28.0862	28.0644	28.3783	28.1146	28.1635	28.1686	28.1995	28.2471	27.6326	28.1478	28.2411	28.0301	27.9431	28.0627	28.2072	28.0822	28.2276												21	21	21	56.6	56.6	56.6	34.011	0	210.68
25.051	25.0367	25.3238	25.1707	25.2357	24.914	24.7945	24.9992	25.0805	25.1991	24.9172	25.3398	25.0717	24.9248	24.8973	24.8107	24.8334	24.9809	24.9977	25.3811	25.3036	24.7854	25.0507	24.8849	25.1203	25.113	25.0012	24.9517	25.0619	25.1005						+					halfMIC_Ctrl	9	9	9	41	41	41	23.514	0	162.23
25.1636	25.5068	25.2663	25.5523	25.6611	25.6519	25.343	25.2848	25.4575	25.4952	25.4194	25.4427	25.5058	25.5053	25.476	25.5785	25.4808	25.5281	25.5244	25.4915	25.6426	25.3715	25.4997	25.6972	25.3108	25.6312	25.5169	25.4667	25.4722	25.5585												14	14	14	41.7	41.7	41.7	45.172	0	43.525
19.8362	19.1257	21.1197	22.0574	21.857	20.3822	22.1803	20.1789	21.7518	20.6801	19.8409	22.2901	22.1365	21.9725	22.2674	19.8712	21.9936	22.2287	22.6283	22.0804	22.0713	22.1484	22.1469	19.4537	21.8264	22.3742	20.2558	18.6694	22.376	22.2954												6	6	6	41.5	41.5	41.5	26.223	0	16.947
21.0372	19.8412	20.9953	19.7216	21.525	18.2533	21.1741	20.7405	21.2042	21.0664	19.8971	19.5395	21.3908	21.2107	19.8364	21.7605	21.4853	21.4783	21.1552	19.186	21.7928	21.3675	21.1494	20.0273	21.2799	21.0335	21.0842	19.273	21.4649	21.4611												6	6	6	22.1	22.1	22.1	52.57	0	12.351
29.1018	29.3146	29.2087	29.2424	29.187	29.3079	29.1408	29.2961	29.3296	29.3779	29.2845	29.138	29.1618	29.2224	29.0849	29.1327	29.0179	29.1225	29.1568	29.1986	29.2632	29.0111	28.863	28.7935	29.3773	29.1088	29.1828	29.3799	29.2013	29.4409						+	+				halfMIC_Ctrl;MIC_Ctrl	20	20	20	91	91	91	16.333	0	225.48
22.9654	23.5346	20.651	20.246	20.077	18.0077	22.3454	18.2693	22.2354	22.3686	22.2376	22.2017	18.9806	22.3277	22.3463	22.4805	22.3754	22.3737	20.312	22.3275	22.3458	22.3392	21.5162	22.3384	21.2976	22.3109	22.3409	22.3847	22.3269	22.2617												4	4	4	32.2	32.2	32.2	20.328	0	20.16
21.5972	20.3082	20.266	20.5315	20.8885	20.3398	20.8315	20.8426	20.5831	20.2397	20.2103	20.2805	20.8706	21.0782	20.6951	20.4593	20.8424	21.2179	20.8521	21.0277	20.8866	21.0862	21.4673	21.0519	20.0954	20.9272	21.1678	20.7167	20.6236	20.5356												3	3	3	27.7	27.7	27.7	20.164	0	10.22
25.0508	25.3925	25.1601	25.5522	25.6435	25.3744	25.3718	25.3082	25.4538	25.5308	25.513	25.3793	25.6815	25.5939	25.7342	25.7156	25.6445	25.8035	25.6646	25.6538	25.6679	25.736	25.7334	25.7678	25.3758	25.7171	25.6621	25.4617	25.6567	25.6139						+	+				halfMIC_Ctrl;MIC_Ctrl	36	36	36	43.2	43.2	43.2	128.55	0	232.2
22.2163	22.7911	22.4399	22.743	23.0888	22.3641	22.7846	22.5938	22.5782	22.7515	22.6758	22.7933	22.8931	22.9037	22.8948	22.9133	22.8893	22.8619	22.6741	22.9099	22.9778	22.9948	22.8823	22.6257	22.578	22.9466	22.8187	22.7052	22.8051	22.8568						+					halfMIC_Ctrl	6	6	6	55.7	55.7	55.7	17.762	0	94.299
27.2927	27.2507	27.3153	27.3567	27.4035	27.191	27.2643	27.2038	27.4209	27.3086	27.4021	27.3916	27.3624	27.2606	27.3297	27.341	27.2808	27.3593	27.2438	27.3855	27.418	27.5521	27.3487	27.5192	27.3944	27.4425	27.3325	27.3844	27.3685	27.2508												22	22	22	77.5	77.5	77.5	43.287	0	323.31
25.3086	25.5224	25.4575	25.5363	25.5071	25.2528	25.2569	25.1708	25.5155	25.5064	25.4298	25.4163	25.4923	25.5305	25.4804	25.7213	25.6006	25.5635	25.3572	25.4718	25.4007	25.697	25.7501	25.6133	25.2937	25.5217	25.5603	25.4531	25.5917	25.521						+					halfMIC_Ctrl	18	18	18	45.2	45.2	45.2	54.796	0	172.7
23.9516	24.237	23.6769	24.2611	24.4967	24.2084	24.3158	23.9801	24.3599	24.2136	24.3319	24.1288	24.4078	24.357	24.6285	24.5711	24.4571	24.7474	24.6773	24.5406	24.4684	24.5213	24.4692	24.5785	24.106	24.5309	24.5536	24.3717	24.621	24.1787						+	+				halfMIC_Ctrl;MIC_Ctrl	11	11	11	46.2	46.2	46.2	30.07	0	107.04
22.9939	23.4973	23.0157	23.4381	23.7934	23.4447	23.4979	23.2912	23.5231	23.4881	23.5859	23.3101	23.765	23.507	23.6833	23.9269	23.6663	23.6983	23.7158	23.8102	23.8062	23.7349	23.7877	23.8033	23.3321	23.4974	23.6426	23.6942	23.6371	23.6869						+	+				halfMIC_Ctrl;MIC_Ctrl	14	14	14	18.3	18.3	18.3	136.75	0	52.837
24.9985	25.3831	25.0964	25.5005	25.5162	25.3433	25.316	25.1973	25.4144	25.4131	25.469	25.3904	25.6044	25.5637	25.4988	25.5712	25.5709	25.6298	25.5761	25.4577	25.3636	25.7566	25.6849	25.7633	25.3583	25.4948	25.5262	25.5127	25.5912	25.4512						+	+				halfMIC_Ctrl;MIC_Ctrl	14	14	14	47.4	47.4	47.4	46.388	0	206.44
24.9641	25.113	24.7289	25.1982	25.2494	25.0459	25.0614	24.8858	25.1042	24.9634	25.0893	24.8673	25.1951	25.1036	25.2209	25.2959	25.3022	25.3491	25.2611	25.2041	25.0954	25.2917	25.3286	25.2295	24.9399	25.2394	25.189	25.0953	25.1754	25.0344						+	+				halfMIC_Ctrl;MIC_Ctrl	23	23	14	49.6	49.6	33.6	66.074	0	199.17
21.5664	21.7089	21.4479	21.7283	21.8427	21.9323	21.6861	21.332	21.8012	21.9625	21.9961	21.9128	22.0551	22.1214	22.0929	22.032	21.9456	21.9869	21.9721	22.0599	22.0606	22.1124	22.1064	21.987	22.0214	22.0367	21.9626	21.7096	21.9026	21.9564					+	+	+				halfMIC_Ctrl;MIC_Ctrl;quarterMIC_Ctrl	6	6	6	17.6	17.6	17.6	56.365	0	16.004
24.9816	25.0466	25.0359	24.9773	24.9797	24.7599	25.0166	24.98	25.1263	24.888	25.0492	24.9261	24.9263	24.9308	24.9329	25.0977	25.0329	25.0607	25.0339	24.8171	24.8608	25.1002	24.9927	25.0013	24.8604	25.1109	25.1468	24.8842	25.1136	24.9917												14	14	14	57.2	57.2	57.2	32.952	0	79.711
24.0077	24.3392	24.2748	24.3719	24.6029	24.3226	24.258	24.0147	24.4035	24.2554	24.4115	24.2129	24.5896	24.4737	24.4024	24.4808	24.5712	24.3981	24.5581	24.5877	24.5508	24.7982	24.6031	24.6685	23.9967	24.4468	24.5336	24.301	24.3932	24.2461						+	+				halfMIC_Ctrl;MIC_Ctrl	13	13	13	44.7	44.7	44.7	46.59	0	79.6
20.1959	19.4068	19.9648	20.6014	23.6127	19.8306	23.5821	18.8409	23.1701	19.07	19.445	23.8245	19.8909	23.3147	23.9458	23.4874	23.3026	23.4451	23.7942	24.2436	23.6742	23.4486	24.5047	23.8186	22.8198	19.4196	20.2594	20.3641	21.0656	23.0117						+	+				halfMIC_Ctrl;MIC_Ctrl	4	4	4	4.7	4.7	4.7	117.27	0	3.1692
18.9814	20.2765	20.3238	20.2301	20.4578	20.4613	19.4361	21.1668	20.5049	19.9284	19.934	17.8924	20.7398	19.8473	20.5106	20.8424	20.6488	19.496	20.1462	17.8774	21.2731	19.9598	20.544	20.4386	20.0013	20.94	20.9582	20.8106	21.6694	19.7813												3	3	3	8.8	8.8	8.8	54.708	0	4.36
26.7103	26.9112	26.5646	26.8606	27.1046	26.7642	26.7718	26.6717	26.8717	26.7563	26.8466	26.6988	27.0243	26.9841	26.8953	26.9819	27.036	27.0039	26.9439	26.8733	26.8823	27.2142	27.0232	26.8394	26.742	26.9605	26.8903	26.9486	26.9934	26.9002						+					halfMIC_Ctrl	17	17	17	53.4	53.4	53.4	34.839	0	274.55
23.0961	23.4025	23.1176	23.5378	23.5006	23.3137	23.2644	23.4615	23.5883	23.3762	23.4267	23.1983	23.7168	23.5462	23.7997	23.8616	23.6515	23.8171	23.7424	23.7623	23.6144	23.9513	23.826	23.8031	23.5253	23.5533	23.5766	23.6221	23.7234	23.6872					+	+	+				halfMIC_Ctrl;MIC_Ctrl;quarterMIC_Ctrl	8	8	8	30.9	30.9	30.9	47.578	0	101.56
21.3206	21.692	21.7994	21.9371	21.7012	21.8917	21.7013	21.6493	22.1038	21.9333	21.9234	21.4927	22.229	22.0874	21.9645	21.7691	22.2796	22.4263	22.1395	21.2826	22.4615	22.1182	22.2888	22.3612	21.5732	22.2173	22.1105	21.599	22.1344	22.206						+					halfMIC_Ctrl	6	6	6	32.9	32.9	32.9	27.122	0	15.64
23.9504	24.0219	23.8149	24.1361	23.7942	23.9332	23.9772	24.0068	23.9768	23.98	24.295	23.7331	24.0041	24.1007	23.8193	23.993	24.0795	24.1007	24.0141	23.9348	24.0624	24.2213	24.3396	24.1555	24.0298	24.0729	23.8905	24.1891	23.9429	23.8665							+				MIC_Ctrl	5	5	5	53	53	53	13.482	0	125.74
21.9467	22.1991	21.9052	22.1337	22.3895	22.2681	22.4017	21.9092	22.1724	21.8095	22.1621	21.9788	22.5418	22.2706	22.3124	22.0838	22.4954	22.5366	22.2882	22.4269	22.4332	23.3322	22.4285	22.4372	21.9956	22.3854	22.4624	22.017	22.238	22.1997						+	+				halfMIC_Ctrl;MIC_Ctrl	4	4	4	39.4	39.4	39.4	17.952	0	17.406
26.1332	26.3875	26.1439	26.4865	26.5377	26.3314	26.4958	26.2387	26.3669	26.435	26.3856	26.3709	26.5819	26.5767	26.5866	26.5713	26.485	26.5253	26.5225	26.4936	26.4944	26.712	26.6119	26.3598	26.2686	26.4293	26.5555	26.446	26.5079	26.4809						+	+				halfMIC_Ctrl;MIC_Ctrl	16	16	16	56.4	56.4	56.4	30.425	0	164.46
22.764	22.9413	23.1542	23.0172	22.8709	22.6114	22.7007	23.1954	22.867	22.8443	22.8237	22.503	23.1472	22.8567	22.7812	22.6575	22.8585	22.8502	22.8148	22.9306	22.9598	23.2691	23.0535	22.9785	23.5793	22.9487	23.2046	22.8443	23.1892	22.5926												7	7	7	29.2	29.2	29.2	34.593	0	15.577
21.1565	18.2136	20.5521	18.2883	20.2836	20.6947	19.0024	19.6386	18.2407	20.8662	19.9236	19.3017	18.3957	20.8361	18.2434	17.9481	20.4396	18.1136	19.4683	18.397	18.5008	18.1832	18.4871	18.2002	19.9008	18.406	18.3734	21.915	18.214	17.082							+				MIC_Ctrl	2	2	2	5.4	5.4	5.4	50.352	0	2.8874
20.9906	21.1437	21.358	21.1679	21.7025	21.448	21.2254	20.9175	21.857	21.3219	21.5017	21.5685	21.6884	21.8422	21.7002	21.516	21.8174	21.6285	21.5923	21.2063	21.9094	19.7242	20.2566	22.0371	21.4012	21.9478	21.8532	21.4905	21.7784	21.6123					+	+					halfMIC_Ctrl;quarterMIC_Ctrl	4	4	4	23.3	23.3	23.3	31.865	0	42.1
19.4854	18.6723	19.1458	19.9805	19.4229	20.1702	19.7654	19.2746	19.32	19.4327	19.954	20.0358	19.1584	20.1939	19.1804	19.5975	19.3868	19.444	21.5276	19.3921	20.8402	21.2824	19.3072	19.8441	20.4937	21.0585	19.3446	21.5526	19.3483	19.4161												2	2	2	10.1	10.1	10.1	32.918	0	3.8191
25.2944	25.6185	25.4314	25.5471	25.9075	25.3541	25.5654	25.3878	25.6289	25.5896	25.7229	25.6058	25.7711	25.6266	25.6476	25.7576	25.6019	25.7686	25.7183	25.6911	25.8434	25.6406	25.709	25.7311	25.4959	25.7235	25.7585	25.6481	25.7529	25.7138							+				MIC_Ctrl	22	22	22	59.2	59.2	59.2	54.781	0	124.7
22.7106	23.2241	22.9377	23.2043	23.6023	23.6834	23.1603	22.9756	23.3592	23.5385	23.5458	23.3873	23.7345	23.59	23.5122	23.4225	23.5858	23.5425	23.7882	23.2435	23.912	23.8597	23.4098	23.9749	23.0789	23.2898	23.6536	23.4187	23.6625	23.5953						+	+				halfMIC_Ctrl;MIC_Ctrl	11	11	11	39.7	39.7	39.7	34.481	0	23.034
21.9452	21.5976	21.4084	21.9548	22.0729	21.7837	21.8749	21.3671	22.0382	21.8847	22.2806	21.8589	22.0895	21.9521	21.9593	22.3061	22.1638	22.0618	22.2	21.8807	21.839	22.4252	22.0137	22.0688	21.7789	22.0838	21.9487	21.571	22.1714	21.8654						+	+				halfMIC_Ctrl;MIC_Ctrl	4	4	4	14.2	14.2	14.2	40.216	0	54.299
23.5509	23.6793	23.2915	23.2231	23.4279	23.0947	23.2277	23.2548	23.6095	23.4197	23.7981	23.3819	23.6454	23.615	23.4699	23.5682	23.5916	23.7377	23.647	23.5237	23.1086	23.3068	23.6837	23.3242	23.1575	23.4871	23.5951	23.2507	23.5822	23.6433						+					halfMIC_Ctrl	8	8	8	36.3	36.3	36.3	34.227	0	77.01
21.3272	21.4606	21.2698	21.6256	20.5747	21.1173	20.6727	20.3365	21.2397	21.2705	21.6235	21.4023	21.5598	21.6916	21.4142	22.4176	21.6241	21.7425	21.7379	21.1822	21.27	21.8352	21.6127	22.0814	21.0442	21.8974	21.573	21.3048	21.5711	19.8333						+					halfMIC_Ctrl	3	3	3	22.3	22.3	22.3	21.442	0	63.454
23.3374	23.7256	23.8128	23.5022	23.6304	23.3867	23.4794	23.438	23.4941	23.5495	23.6258	23.5347	23.7742	23.6447	23.7558	23.7769	23.7336	23.594	23.7963	23.9526	23.7828	23.7241	23.8845	23.7286	23.4	23.6594	23.6155	23.5881	23.7621	23.7037							+				MIC_Ctrl	10	10	10	34.1	34.1	34.1	40.106	0	114.58
21.8052	21.7302	22.2857	21.3242	21.7108	21.9989	22.0203	21.56	21.7435	21.6178	21.847	21.5631	21.6198	19.2863	22.3408	21.8405	21.9418	22.037	22.2012	22.0239	22.6389	20.7002	22.6983	22.8927	21.5924	19.9073	21.8078	22.1716	22.0247	21.739												5	5	5	21.1	21.1	21.1	36.979	0	27.25
19.7274	20.0026	20.511	20.3217	20.6382	20.0257	20.3164	20.0975	20.3908	19.9785	20.6217	20.3823	20.0387	19.8991	19.9941	20.312	19.994	20.051	20.596	20.2705	22.5057	20.3595	19.9876	19.4912	19.1092	19.9566	20.2878	20.2895	20.2556	20.3589												2	2	2	6.3	6.3	6.3	40.044	0	18.961
25.2502	25.4606	25.41	25.5971	25.6427	25.5465	25.5046	25.2966	25.5897	25.703	25.5114	25.5651	25.4945	25.606	25.7413	25.6655	25.6404	25.6797	25.6144	25.3917	25.6453	25.7588	25.7116	25.7697	25.5124	25.548	25.6385	25.4577	25.5751	25.6191						+	+				halfMIC_Ctrl;MIC_Ctrl	20	20	20	69.6	69.6	69.6	43.795	0	180.17
22.7641	22.266	22.5156	22.5062	22.1617	22.1367	22.2347	22.5121	22.5241	22.572	22.5595	22.3259	22.539	22.5584	22.5209	22.862	22.7357	22.8747	23.187	22.7466	23.3137	23.7365	23.0188	23.1543	22.6886	22.5122	22.7132	22.6265	22.3803	22.5712						+	+				halfMIC_Ctrl;MIC_Ctrl	6	6	6	24.6	24.6	24.6	34.329	0	13.281
25.3637	24.9449	25.353	25.2391	24.9942	25.1575	25.0312	25.0544	25.1881	25.1306	25.1678	25.2226	25.0444	25.0238	24.9141	25.3663	24.9822	25.2263	25.0155	25.0516	25.3031	24.9188	24.8646	24.8927	25.175	25.106	24.9971	25.2851	24.9588	24.9748												8	8	8	50	50	50	16.639	0	83.509
22.8405	23.5011	23.1585	23.5115	23.7986	23.4265	23.4723	23.3692	23.5083	23.4852	23.2009	23.6923	23.7578	23.6517	23.4749	23.6413	23.4275	23.5832	23.6578	23.9413	23.6361	23.795	23.6734	23.7368	23.5168	23.8289	23.8287	23.4521	23.7105	23.6271							+				MIC_Ctrl	6	6	6	29.2	29.2	29.2	29.39	0	78.54
18.8567	19.0571	20.4248	20.2369	21.2511	20.8725	21.1029	19.978	20.9136	21.2536	19.7502	19.3522	21.4631	19.0276	20.8946	20.9179	20.7083	19.1856	19.2896	20.0154	20.8672	20.0588	20.3529	20.9018	19.1599	19.3793	19.6813	20.6366	21.5984	19.1176												5	5	5	13.5	13.5	13.5	35.513	0.00091743	2.6342
20.1205	21.4253	19.6559	21.7237	21.5857	19.3577	20.0231	19.835	19.6242	21.0815	20.3703	21.2926	19.7665	19.7629	20.2512	21.2511	19.5829	21.6151	19.1096	19.9348	20.7139	19.6997	19.9622	19.8424	21.0146	20.3117	19.1003	19.1647	18.5751	21.0008												2	2	2	10.8	10.8	10.8	30.059	0.0018198	2.4977
24.0299	24.1468	24.0758	24.29	24.3802	23.928	24.0149	24.0327	24.3431	24.1466	23.9982	24.0381	24.0266	24.015	24.0267	23.6744	23.8511	23.8745	23.918	24.5843	24.5345	24.398	23.7514	24.2714	24.1305	24.1949	23.9344	23.9201	23.9136	23.8804						+					halfMIC_Ctrl	14	14	14	43.7	43.7	43.7	52.314	0	85.497
23.2045	23.4842	23.484	23.4822	23.2931	22.981	23.4842	23.3156	23.2358	23.3134	23.4447	23.427	23.3953	23.5516	23.7518	23.5666	23.5133	23.5185	23.3953	23.4288	23.4196	23.6319	23.4406	23.6649	23.3178	23.3122	23.3515	23.4165	23.4701	23.2329						+					halfMIC_Ctrl	10	10	10	48.9	48.9	48.9	34.886	0	58.913
19.8936	20.9819	20.7656	20.8852	21.1269	20.9864	20.6988	20.5355	21.2261	19.7237	20.8065	20.7836	20.9947	21.1306	20.9562	20.9815	20.7289	21.3798	20.0706	19.258	19.7182	21.1445	21.1854	21.2972	20.6648	21.0068	20.8951	20.4706	20.9279	20.9416												4	4	4	17.9	17.9	17.9	33.069	0	5.6915
20.9992	22.4641	22.465	22.8687	23.0239	22.862	22.8608	22.2268	22.6167	19.7992	23.017	22.3548	22.9654	23.2109	23.3014	23.226	23.0042	23.1255	23.2122	22.9601	22.8652	22.9439	23.3625	23.0434	22.634	22.9295	22.6349	22.8663	23.0261	22.8011						+					halfMIC_Ctrl	6	6	6	49.8	49.8	49.8	28.046	0	14.229
22.0468	22.1512	21.9282	21.9977	22.1175	22.0152	22.4331	22.0127	22.1424	22.204	22.2539	21.5939	21.9988	21.9477	22.471	22.5076	22.165	22.1241	22.1958	22.5968	22.5087	22.6823	22.5457	22.1495	21.949	22.039	22.2573	22.1572	22.2999	22.0348							+				MIC_Ctrl	9	9	9	37.5	37.5	37.5	32.808	0	96.518
21.0327	19.8905	19.1463	20.7099	20.5924	19.7533	20.3151	19.9809	20.7732	20.7374	21.1193	19.4081	20.759	21.2042	20.87	21.2512	20.9251	19.5534	19.7721	21.541	20.8522	19.948	20.0924	20.4429	21.4278	20.1859	20.8787	21.1477	21.2458	20.4383												2	2	2	16.8	16.8	16.8	16.793	0	9.3831
23.5814	23.9257	23.4425	23.8433	23.8295	23.6891	23.6179	23.506	23.6942	23.9917	24.0366	23.8206	24.1181	24.1352	23.7987	24.0809	24.1074	24.1876	24.1598	24.1732	23.8755	24.3867	24.2233	24.5314	23.6931	24.218	24.065	23.5253	24.0013	24.1904						+	+				halfMIC_Ctrl;MIC_Ctrl	10	10	10	51.8	51.8	51.8	34.444	0	58.97
24.7879	25.3113	24.8391	25.2066	25.4171	25.0826	25.1494	24.8907	25.2844	25.1336	25.3777	25.1947	25.5996	25.4399	25.3838	25.4511	25.5546	25.5978	25.5033	25.2603	25.3416	25.7673	25.5866	25.6556	25.1115	25.5353	25.4718	25.146	25.5648	25.2742						+	+				halfMIC_Ctrl;MIC_Ctrl	20	20	20	63.5	63.5	63.5	49.675	0	153.81
21.3891	21.479	21.4056	21.2928	21.6457	20.7378	21.3342	21.1384	21.5681	21.708	21.0719	21.6522	21.5741	21.6961	21.3264	21.5328	21.4942	21.8797	21.605	20.6376	20.9245	19.4799	22.2544	21.409	21.1575	21.6132	21.2978	21.2296	21.3003	21.4358												3	3	3	26.6	26.6	26.6	16.306	0	10.958
24.7913	25.0777	24.9517	25.0599	25.4049	25.0567	25.0889	24.8884	25.2984	25.2284	25.1967	24.9667	25.2567	25.2398	25.1418	25.2398	25.382	25.361	25.2721	25.2764	25.1454	25.2855	25.2538	25.2196	24.8874	25.2439	25.237	24.9872	25.2689	25.2919						+	+				halfMIC_Ctrl;MIC_Ctrl	8	8	8	45.6	45.6	45.6	29.255	0	63.17
18.832	21.8263	21.2144	21.48	21.6272	21.327	21.1118	19.6072	21.2712	21.2269	20.3682	21.0887	21.3385	21.087	20.7523	21.2622	20.887	21.35	21.3589	20.3504	20.9317	19.6474	21.2116	19.9939	20.9433	21.058	21.4886	21.3002	21.5691	21.5377												3	3	3	46	46	46	13.996	0.0026667	2.1839
24.051	24.0341	23.8848	24.2295	24.4774	23.9509	24.2814	24.0211	24.1441	24.2304	24.1789	24.0714	24.0184	24.2274	24.3235	24.4947	24.1715	24.3126	24.4659	23.8958	24.881	24.418	24.3357	24.4718	24.1011	24.3404	24.1897	24.191	24.328	24.3636												9	9	9	32.8	32.8	32.8	45.685	0	54.131
20.3977	21.1923	21.1155	21.3749	21.7096	21.3933	21.1376	21.2757	21.3461	21.284	21.4006	21.3075	21.6606	21.5609	21.3766	21.5948	21.5866	22.2116	22.3304	21.6903	21.6244	22.1912	21.8819	21.7908	21.1363	21.7996	21.4742	21.3478	21.3509	21.1863						+	+				halfMIC_Ctrl;MIC_Ctrl	4	4	4	24.2	24.2	24.2	17.478	0	7.8105
22.7785	22.4907	22.3626	22.6708	22.7651	22.4214	22.9477	22.42	22.7375	22.8176	22.7603	22.2187	22.7319	22.8113	23.0059	22.7664	22.8243	22.9482	22.8657	22.7284	22.8223	22.7886	22.839	23.1711	22.8093	22.6571	22.9977	22.6545	22.7718	22.7504						+	+				halfMIC_Ctrl;MIC_Ctrl	10	10	10	32.6	32.6	32.6	51.983	0	51.778
23.5146	23.7513	23.5416	23.8198	23.7313	23.9069	23.742	23.6176	23.8357	23.8097	23.8397	23.6498	23.8333	23.6419	23.8176	23.888	23.7958	23.8998	23.7603	23.8188	23.8533	23.8976	23.9792	23.8703	23.7052	23.7372	23.8301	23.6346	23.8858	23.8384							+				MIC_Ctrl	17	17	17	25.9	25.9	25.9	84.073	0	142.39
19.2853	21.744	21.3018	21.2777	21.3771	21.1644	20.0982	20.8059	20.9836	20.8062	21.1648	21.0925	21.0597	21.1046	20.5682	21.1672	21.0007	20.9639	20.8035	20.9364	21.0172	18.2883	20.9868	20.8432	19.6412	19.9401	20.212	20.9683	19.2551	20.9277												5	5	5	36	36	36	24.983	0	5.5872
23.4193	23.5953	23.7995	23.8052	23.7782	23.0363	23.6221	23.2296	23.4276	23.55	23.535	23.6466	23.7391	23.6464	23.6566	23.7601	23.5097	23.8021	23.6349	23.5617	23.618	24.0661	23.9932	24.0025	23.379	23.807	23.3818	23.3944	23.7493	23.4613												11	11	11	41.5	41.5	41.5	46.755	0	168.26
22.9377	23.548	23.0993	23.0874	23.707	23.1881	23.3733	23.3637	23.6172	22.7225	23.4246	23.6153	23.7417	24.0008	24.0015	23.6569	24.0256	23.9554	23.8527	23.6498	23.7118	24.3165	23.9379	24.0473	23.5554	23.9446	23.7917	23.5551	23.8893	23.2401					+	+	+				halfMIC_Ctrl;MIC_Ctrl;quarterMIC_Ctrl	8	8	8	33.6	33.6	33.6	35.958	0	47.263
23.8895	23.9613	24.3874	24.0577	24.0125	23.9182	23.8894	23.9193	24.0719	24.1167	24.0875	23.8806	24.0062	23.8126	23.9496	24.0213	23.874	23.8973	23.9062	24.298	24.2814	24.1964	24.3094	24.0665	23.8614	23.9747	23.9236	23.9578	23.9777	23.996												12	12	12	21.1	21.1	21.1	82.051	0	115.53
20.9079	21.4685	20.869	21.3485	21.6101	21.3265	21.6392	20.7618	21.6762	21.0051	21.7202	21.3411	21.6456	21.4952	21.7659	21.9595	21.7823	22.006	21.4172	21.7354	21.2945	21.3473	21.7302	22.1319	21.3461	22.1095	21.6045	20.8748	21.6352	21.6393						+					halfMIC_Ctrl	3	3	3	30.1	30.1	30.1	15.922	0	23.988
24.3528	24.4755	24.1542	24.4007	24.5976	24.2586	24.5369	24.3182	24.5838	24.2329	24.4621	24.3594	24.6778	24.4825	24.6234	24.6513	24.5694	24.6261	24.7266	24.4507	24.6471	24.8375	24.8499	24.8932	24.324	24.7042	24.5069	24.4444	24.5896	24.4633						+	+				halfMIC_Ctrl;MIC_Ctrl	12	12	12	50.3	50.3	50.3	39.696	0	138.45
19.5551	20.0797	20.3136	20.7139	19.7268	19.4981	21.4248	19.9203	20.5918	19.202	18.8025	18.45	19.4115	20.9299	21.008	20.1397	19.1474	20.5241	19.9204	19.7907	19.4346	19.6134	20.5744	19.3907	19.4761	20.5653	19.5108	21.038	20.7385	20.2591												2	2	2	11.2	11.2	11.2	25.416	0	5.7562
21.0236	21.4198	21.3016	20.3946	21.1435	20.4096	20.4106	20.5356	20.831	21.256	20.7737	21.2063	21.0714	20.8956	20.933	21.1432	21.0286	20.983	20.493	20.9035	19.993	20.7345	21.2046	20.7957	20.9175	20.7013	21.2471	21.0034	20.8588	20.9125												2	2	2	9.3	9.3	9.3	33.212	0	21.799
29.8587	29.8157	29.8721	29.896	29.8006	29.7933	29.8063	29.7971	29.9822	29.9171	29.9883	29.6939	29.6262	29.6983	29.7063	29.8707	29.7352	29.8351	29.8023	29.6614	29.7678	29.8481	29.5907	29.8789	29.7462	29.7615	29.7839	29.8839	29.7761	29.9751						+					halfMIC_Ctrl	24	24	24	85.5	85.5	85.5	20.266	0	323.31
25.4	25.9871	25.9771	26.0506	26.461	25.8772	25.5289	25.5368	26.5356	25.8677	25.7673	25.9255	25.6534	25.1283	24.9032	25.1576	26.0284	25.4369	25.4156	25.6832	25.3663	25.8482	25.0093	24.6243	25.3621	25.5841	25.7043	25.676	26.4725	25.1537						+	+				halfMIC_Ctrl;MIC_Ctrl	11	11	11	36.6	36.6	36.6	43.129	0	6.9325
21.4771	20.3566	20.3654	20.8013	20.0086	21.1093	20.9107	21.3593	20.5432	20.6379	20.0802	21.4652	20.6294	20.2941	20.6203	20.0196	20.1586	19.7943	20.4576	21.4278	18.2252	19.2199	20.6279	20.3058	20.4364	20.6843	20.4323	20.6058	20.2784	19.7539												4	4	4	27.4	27.4	27.4	21.416	0	33.444
25.0503	25.2751	25.3469	25.1108	25.2586	25.3693	25.1976	25.145	25.2955	25.3035	25.4261	25.2291	25.1415	25.1135	25.0188	25.2984	25.1026	25.2448	24.9295	24.9161	24.9709	24.9364	24.926	25.1225	24.9617	25.1693	25.3233	25.1317	25.2708	25.3331							+				MIC_Ctrl	6	6	6	66.1	66.1	66.1	13.6	0	51.243
23.5391	23.5774	23.7221	23.5602	23.7381	23.095	23.4826	23.6127	23.5321	23.3879	23.5095	23.4313	23.7404	23.7119	23.7617	23.9533	23.7421	23.7538	23.6672	23.9051	23.875	23.9205	23.6423	23.7443	23.3407	23.6686	23.702	23.5837	23.7142	23.386						+	+				halfMIC_Ctrl;MIC_Ctrl	11	11	11	59	59	59	35.07	0	66.782
25.2281	25.2333	25.8882	25.973	24.8611	25.0892	25.5444	25.5835	25.4728	25.4013	25.3386	25.4404	25.184	25.5026	25.1245	25.2769	25.5614	25.0591	25.5638	25.7132	25.9991	25.8247	25.354	25.6663	25.7285	25.4889	25.1597	25.4824	25.149	25.2918												24	24	24	73.1	73.1	73.1	35.071	0	183.76
22.8361	22.6433	23.0458	23.1971	23.5088	22.8571	23.0528	22.6685	23.2357	22.8948	22.9666	22.8741	22.9844	22.835	22.9218	22.873	23.121	23.0685	23.2034	22.637	23.8122	23.2554	22.8382	23.165	22.7847	23.079	22.9652	23.0698	23.1045	23.0671												15	15	15	56.3	56.3	56.3	43.407	0	51.958
25.7874	26.3086	25.8522	26.1674	26.4228	26.0316	25.9235	25.8734	26.2226	26.1376	26.0959	26.0066	26.2923	26.3254	26.2001	26.2473	26.3704	26.3638	26.4143	26.3782	26.5384	26.4071	26.4142	26.426	25.9706	26.2753	26.3136	26.0453	26.2616	26.216						+	+				halfMIC_Ctrl;MIC_Ctrl	18	18	18	55.3	55.3	55.3	40.742	0	224.59
24.5068	24.6467	24.6893	24.532	24.7757	24.7237	24.5442	24.5141	24.7599	24.64	24.6403	24.6264	24.7213	24.8818	24.8249	24.9109	24.7163	24.8641	24.9328	24.7868	25.2344	24.9796	25.0694	24.9896	24.6984	24.7611	24.79	24.7411	24.9275	24.7844					+	+	+				halfMIC_Ctrl;MIC_Ctrl;quarterMIC_Ctrl	7	7	7	45.6	45.6	45.6	19.326	0	67.407
23.5933	23.647	23.4521	23.6868	23.8767	23.5082	23.6299	23.334	23.4659	23.7645	23.7837	23.5366	23.7785	23.5432	23.9512	23.9109	23.8878	24.017	23.8094	23.6318	23.8098	23.835	23.9059	23.8692	23.5682	23.8064	23.9563	23.7741	23.8987	23.7881						+	+				halfMIC_Ctrl;MIC_Ctrl	13	13	13	23.3	23.3	23.3	83.693	0	62.755
23.124	23.3402	23.1724	23.4458	23.3659	23.1213	23.1957	23.0615	23.1832	23.263	23.4376	23.2303	23.1488	22.9857	22.9749	23.2717	23.2223	23.2346	23.1022	23.1022	23.2215	23.4862	23.2191	23.4476	22.9392	23.3048	23.1751	22.825	23.2577	23.3076												9	9	9	69.3	69.3	69.3	24.604	0	75.87
24.919	24.9809	24.8074	25.0149	25.0415	25.0527	25.0439	24.9654	24.8308	25.0787	25.0142	25.0184	25.1492	25.0747	25.0225	24.9605	25.0724	25.2147	25.1156	25.1964	25.43	25.0726	25.3198	25.2964	25.0635	25.253	25.028	24.9285	25.1458	24.9472						+	+				halfMIC_Ctrl;MIC_Ctrl	8	8	2	45.5	45.5	10.5	23.327	0	94.108
20.9351	21.0588	20.9624	21.0773	20.9956	20.8141	20.5059	21.0234	21.1848	20.9065	21.3066	20.564	21.0117	20.6371	21.1005	21.332	20.7322	20.9114	21.3563	21.1584	21.1958	21.5629	19.4031	21.304	20.7672	19.6079	21.1403	20.7554	21.2931	21.0765												3	3	3	14	14	14	30.971	0	4.2293
21.5657	20.4259	22.0321	21.6167	21.3172	20.0774	20.1191	21.8178	21.7104	21.7368	21.7849	20.9201	22.1885	21.7206	21.9253	22.0618	22.0599	22.0475	22.0799	22.2498	22.4126	22.7762	22.4366	22.1575	21.8733	21.8557	21.7392	22.2203	21.687	21.8698						+	+				halfMIC_Ctrl;MIC_Ctrl	7	7	7	19.2	19.2	19.2	46.914	0	16.654
24.9878	25.2229	25.1298	25.2438	25.2298	25.1604	25.1577	25.002	25.3671	24.9961	25.212	25.0623	25.2618	25.2986	25.3813	25.4052	25.3767	25.4675	25.3301	25.3909	25.3046	25.5502	25.4468	25.4143	25.1515	25.1837	25.3463	25.1421	25.2215	25.2481						+	+				halfMIC_Ctrl;MIC_Ctrl	16	16	16	51.1	51.1	51.1	51.08	0	97.026
28.7483	28.7781	28.8771	28.748	28.7005	28.7004	28.7354	28.7032	28.8681	28.6968	28.9246	28.7417	28.8954	28.7035	28.6929	28.8725	28.8419	28.8346	28.8737	28.5684	28.418	28.5571	28.7861	28.5007	28.7717	28.7803	28.7694	29.025	28.8778	28.8397												11	11	11	62.4	62.4	62.4	12.835	0	110.6
23.0267	23.6153	22.9643	23.2945	23.4858	23.0741	22.8243	23.0412	23.2917	23.3849	23.3055	23.2674	23.3934	23.2636	23.3512	23.3793	23.334	23.4361	23.2405	23.1833	23.4641	23.4042	23.4522	23.464	23.1975	23.3795	23.2361	23.2557	23.1277	23.3969												6	6	6	33.5	33.5	33.5	27.969	0	66.121
23.2912	23.7379	23.4039	23.7927	23.9927	23.55	23.8565	23.4614	23.5178	23.6703	23.8694	23.7066	23.955	23.9867	24.0848	24.079	23.8814	23.9908	23.9868	23.933	23.5968	24.2826	24.0566	24.3079	23.6206	23.9265	23.8043	23.8446	23.9475	23.7483						+	+				halfMIC_Ctrl;MIC_Ctrl	10	10	10	34.8	34.8	34.8	52.946	0	49.605
23.6032	24.0224	23.7376	24.0595	24.2096	23.7485	23.901	23.6871	24.0373	23.9434	24.2011	23.8926	24.025	24.0431	24.1831	24.2423	23.9979	24.0567	24.1439	24.3318	24.0888	24.291	24.2109	24.1608	23.9718	24.1355	24.1009	24.023	24.1964	24.102							+				MIC_Ctrl	8	8	8	26.7	26.7	26.7	48.282	0	159.97
22.3973	22.3998	22.3246	22.7586	22.6742	21.9673	22.1697	22.387	22.5463	22.5167	22.5378	22.685	22.8254	22.4773	22.4481	22.7608	22.6936	22.8776	22.8339	22.7363	22.4079	22.3587	23.0885	22.4705	22.2592	22.5114	22.6993	19.6704	22.8966	23.0308						+					halfMIC_Ctrl	6	6	6	38.4	38.4	38.4	22.184	0	19.363
26.5175	26.6264	26.6349	26.673	26.6228	26.5303	26.4821	26.4376	26.738	26.656	26.663	26.4961	26.6954	26.6709	26.658	26.7986	26.6651	26.752	26.7677	26.6772	26.7664	26.6272	26.7512	26.7617	26.5496	26.737	26.7505	26.6712	26.7345	26.8872					+	+	+				halfMIC_Ctrl;MIC_Ctrl;quarterMIC_Ctrl	17	17	17	42.4	42.4	42.4	46.297	0	264.9
23.669	23.6461	23.5776	23.8198	24.1229	24.0383	23.8542	23.9106	23.7827	23.2006	23.8561	23.934	24.0914	23.9809	23.7193	24.0872	24.0073	23.581	23.8769	24.2741	23.8979	23.8436	24.0812	24.1302	23.5058	23.9427	23.8745	23.7845	24.0808	23.7008												5	5	5	33.8	33.8	33.8	17.11	0	15.403
22.8953	23.1001	22.8199	23.1959	23.074	22.9838	23.0378	22.736	23.1493	22.9002	23.3083	23.1676	23.2522	23.1194	23.3173	23.2819	23.2387	23.3873	23.2564	23.3609	23.1209	23.3434	23.3553	23.3665	22.9815	23.1944	23.3068	23.2686	23.3677	23.1507					+	+	+				halfMIC_Ctrl;MIC_Ctrl;quarterMIC_Ctrl	10	10	10	24	24	24	64.05	0	47.209
23.0497	23.3554	23.3453	23.4564	23.5922	23.2252	23.3832	23.15	23.662	23.3986	23.4715	23.203	23.6149	23.4265	23.5118	23.6458	23.6282	23.6516	23.6267	23.6906	23.5349	23.5671	23.5841	23.295	23.5071	23.455	23.5658	23.3077	23.8043	23.6211						+	+				halfMIC_Ctrl;MIC_Ctrl	10	10	10	32.1	32.1	32.1	41.904	0	43.025
25.5542	25.9057	25.6809	26.0183	26.1616	25.8351	25.9383	25.7617	25.8463	25.8711	26.0064	25.951	26.1706	26.0926	26.1502	26.263	26.1368	26.2742	26.1813	26.0189	26.1597	26.2707	26.2013	26.2129	25.7913	26.1125	26.1611	25.923	26.1068	25.9844						+	+				halfMIC_Ctrl;MIC_Ctrl	21	21	21	55.2	55.2	55.2	52.824	0	300.51
20.2978	21.3813	19.9626	21.256	21.4122	19.3504	21.2019	20.4368	21.294	21.2203	19.3525	21.2205	20.9026	21.9005	21.3734	21.0847	21.3967	21.3538	19.206	20.1821	19.5328	21.1552	21.6696	21.646	21.3235	21.3815	21.1851	21.3669	21.5261	20.0226						+					halfMIC_Ctrl	3	3	3	18.1	18.1	18.1	24.992	0	16.579
22.3435	22.8335	22.7967	23.0755	22.8687	22.9634	22.7306	22.6013	23.078	22.8094	22.8583	22.5103	23.0234	22.7252	22.8868	23.0552	23.076	22.9721	22.9793	23.0036	22.7163	22.9275	22.8214	23.0322	22.7299	23.0983	22.9238	22.9293	22.9803	22.9564												5	5	5	52	52	52	24.921	0	21.743
21.1032	21.5697	21.5125	21.5871	21.6095	20.9763	21.1558	21.2457	21.502	21.3273	21.2433	21.5904	21.5779	21.5492	21.3275	21.3616	21.0157	21.3595	21.4144	21.1545	21.2826	21.9523	21.7326	21.4153	21.1451	21.4134	21.2907	21.2756	21.4807	21.544												5	5	5	21.5	21.5	21.5	28.597	0	16.51
23.5157	23.3518	23.4826	23.4594	23.2403	23.577	23.4891	23.3582	23.5584	23.4174	23.3752	23.2886	23.2938	23.5839	23.4	23.6846	23.5012	23.637	23.4644	23.3639	23.6364	23.4756	23.5109	23.5133	23.0988	23.3457	23.3679	23.4284	23.5108	23.4166												6	6	6	32.5	32.5	32.5	31.01	0	68.478
23.7904	24.1007	23.7616	24.0575	23.9506	23.9088	23.7919	23.7968	24.0759	23.8222	24.0988	23.8045	24.1526	23.9977	24.2143	24.3282	24.1155	24.2918	24.1654	24.1386	24.126	24.2887	24.278	24.1768	24.0273	24.1281	24.0458	23.9721	24.1809	24.1223					+	+	+				halfMIC_Ctrl;MIC_Ctrl;quarterMIC_Ctrl	5	5	5	42.8	42.8	42.8	16.014	0	74.575
22.6606	22.7574	20.0836	22.8192	22.6583	19.7873	22.2958	19.0379	22.6242	22.8698	22.7147	19.1725	22.3395	22.1022	22.2402	20.1787	22.1351	21.1093	22.498	22.206	20.5006	20.5273	22.2797	20.7383	20.6603	22.3419	22.5871	19.1986	22.2851	22.5999												3	3	3	23.6	23.6	23.6	22.042	0.0017905	2.2442
22.625	22.4739	22.5775	22.2555	19.9667	21.9306	21.8033	22.3353	22.2572	21.9139	22.5375	21.9109	22.125	22.3469	22.1513	22.4829	22.1401	22.4683	22.2003	22.2647	22.319	22.0243	22.2484	22.1023	18.8536	21.5965	22.2412	22.3042	22.2566	22.3458												6	6	6	26.3	26.3	26.3	33.576	0	9.701
23.2375	22.2025	23.8764	21.0557	21.865	21.2482	21.7809	22.5021	22.0825	22.0102	21.6353	22.4716	21.321	21.2481	21.0528	20.9763	21.0536	20.8296	19.8742	21.9036	21.4263	20.6899	20.0993	20.2494	22.2912	21.5399	21.2371	21.9803	21.3872	21.4892						+	+				halfMIC_Ctrl;MIC_Ctrl	3	3	3	26.6	26.6	26.6	9.2033	0	8.8613
22.802	23.4039	22.742	23.308	23.3307	23.2852	23.0892	23.049	23.1179	23.0912	23.3111	22.9421	23.2041	23.2545	23.2433	23.5013	23.3476	23.4377	23.5362	23.1365	23.222	23.2731	23.3842	23.0704	23.2058	23.2126	23.2462	23.2357	23.3362	23.1845												5	5	5	44.3	44.3	44.3	21.062	0	60.133
20.9016	20.5042	20.0711	20.1492	20.8454	19.4381	19.8644	20.2976	20.2908	20.6337	20.4117	19.8833	20.4332	19.8888	20.2471	19.4008	18.3937	20.1908	20.5715	20.0763	21.3376	19.1788	19.768	19.1888	19.4725	19.8632	20.9468	20.7551	20.1939	19.7953												2	2	2	22.3	22.3	22.3	11.04	0	2.8097
24.6886	24.8123	24.4403	24.843	24.8085	24.9798	24.8352	24.6778	24.928	24.8934	24.8534	24.5743	24.9616	24.8038	24.9514	25.1453	24.964	24.9927	24.9841	24.9693	24.8186	24.8822	25.091	25.2027	24.7955	24.8229	24.9529	24.9751	24.9604	24.8611						+	+				halfMIC_Ctrl;MIC_Ctrl	19	19	19	40.3	40.3	40.3	74.363	0	127.59
21.6661	19.7976	21.5029	19.7322	21.6616	20.0656	21.4962	19.2903	20.1305	20.2313	20.6922	21.5188	21.4661	19.3598	19.5829	19.525	19.7938	19.3652	20.196	19.7705	21.9488	19.9967	20.405	18.2056	19.7153	20.0711	21.6276	19.5596	21.3242	21.2503												3	3	3	32.7	32.7	32.7	23.041	0	3.7481
19.0181	19.5552	20.1575	19.7605	20.0639	21.2355	19.4765	19.8731	19.097	20.6504	21.0469	20.5103	18.8859	20.2537	20.2332	19.2311	20.1707	20.5124	20.1129	20.8968	19.6101	20.3677	19.8466	20.6799	19.3727	18.969	20.4062	20.0107	20.6869	19.7596												3	3	3	16.1	16.1	16.1	29.171	0	5.5971
28.0825	28.1649	28.1355	28.3409	28.3633	28.2785	28.07	28.0916	28.3501	28.2492	28.3157	28.1567	28.1697	28.2131	28.2539	28.2814	28.2087	28.2728	28.2541	28.2554	28.3459	28.3818	28.2362	28.5192	28.1772	28.2323	28.2687	28.156	28.2918	28.311												17	17	17	64	64	64	43.739	0	323.31
26.3102	26.6444	26.5468	26.6743	26.7543	26.5776	26.4961	26.4806	26.6468	26.6195	26.6075	26.5249	26.7907	26.7121	26.68	26.6907	26.628	26.7451	26.664	26.6713	26.6869	26.7367	26.6611	26.4918	26.6306	26.5813	26.6834	26.5578	26.5926	26.6103												23	23	23	55.7	55.7	55.7	54.347	0	225.42
23.1887	23.3458	23.0265	23.5793	23.442	22.8124	23.2977	23.0462	23.4486	23.2723	23.4654	23.119	23.3873	23.5311	23.3083	23.5384	23.5352	23.3059	23.5626	23.3008	23.2774	23.0627	23.3601	23.4361	23.1032	23.4685	23.4233	23.3691	23.4145	23.3005												4	4	4	29.9	29.9	29.9	17.016	0	48.303
19.7188	20.1352	19.9739	21.1065	21.2858	20.461	21.6969	19.8064	20.2015	21.5314	20.0617	20.1783	21.5441	21.3162	21.5152	19.9318	21.2453	21.5164	22.0123	21.9782	22.0127	21.5119	21.231	20.1762	21.6397	21.7914	21.558	21.4317	21.8362	21.7183					+	+	+				halfMIC_Ctrl;MIC_Ctrl;quarterMIC_Ctrl	6	6	6	62.9	62.9	62.9	11.649	0	24.861
23.4529	23.88	23.9532	23.9126	24.1092	23.6766	23.7611	23.6026	23.9639	23.9608	23.9448	23.9584	23.9663	24.057	23.9876	24.1542	24.106	24.165	24.1803	24.1617	24.2046	24.1895	24.2	24.1699	23.8901	24.126	23.9437	24.0193	23.949	24.0005						+	+				halfMIC_Ctrl;MIC_Ctrl	20	20	20	40	40	40	75.08	0	149.35
25.0616	25.1976	24.8766	25.1245	25.0897	25.1197	25.145	24.9604	25.1018	25.1565	25.2286	24.9894	24.7187	24.8888	24.9028	25.1002	24.8547	25.0048	24.8824	24.7684	24.6554	24.7395	24.9332	24.7657	24.8302	24.9885	24.9889	24.8851	25.0015	24.81					+	+	+				halfMIC_Ctrl;MIC_Ctrl;quarterMIC_Ctrl	17	17	17	40.1	40.1	40.1	74.399	0	274.23
20.8297	20.937	20.6934	20.0642	21.0825	20.9269	20.7943	20.5433	20.7239	21.0271	20.6014	20.5406	20.8994	20.8193	20.3451	20.2779	20.435	20.5818	20.325	19.6103	20.0634	19.8539	21.2884	20.2398	20.9045	20.6572	20.7718	20.6434	20.4992	21.0565												3	3	3	18.5	18.5	18.5	17.311	0	7.8962
24.0776	24.5492	24.2906	24.5318	24.704	24.4271	24.487	24.4152	24.5369	24.4083	24.528	24.3697	24.6495	24.5886	24.6688	24.5872	24.609	24.813	24.6687	24.5154	24.4831	24.7423	24.6748	24.953	24.4308	24.7238	24.7309	24.5954	24.7448	24.5882						+	+				halfMIC_Ctrl;MIC_Ctrl	11	11	11	48.9	48.9	48.9	30.395	0	92.719
24.0821	24.4237	24.1337	24.5056	24.5381	24.2988	24.3834	23.9917	24.6092	24.3869	24.5238	24.2919	24.6403	24.6507	24.7242	24.6428	24.6509	24.8108	24.6146	24.687	24.6968	24.799	24.824	24.9396	24.3291	24.4865	24.6413	24.3372	24.5776	24.5502						+	+				halfMIC_Ctrl;MIC_Ctrl	15	15	15	42.8	42.8	42.8	49.843	0	99.693
20.6179	21.5203	21.0832	21.6104	21.788	21.7918	21.8265	21.3117	21.5592	21.5206	21.4224	21.1391	21.6742	21.8693	21.6702	21.6701	21.4366	21.7201	21.763	21.8659	21.7506	21.4574	21.8417	22.1469	20.9439	21.4795	21.6245	21.4453	21.7459	21.7548												4	4	4	27.4	27.4	27.4	21.199	0	14.001
20.5544	23.2124	20.3453	23.1628	20.5379	23.5201	23.1524	23.0765	23.2686	19.9618	23.3051	20.1565	23.1201	20.8067	23.1252	23.1306	23.294	23.1735	20.349	23.0774	23.5922	23.5783	19.6539	23.7277	23.0649	23.2003	23.0347	19.893	23.2504	20.1355												3	3	3	30.7	30.7	30.7	14.05	0	4.1805
23.985	24.1712	24.1372	24.2543	24.5207	24.18	24.1639	24.1308	24.2714	24.4143	24.1711	24.2404	24.4478	24.4576	24.3415	24.3941	24.3997	24.5177	24.3508	24.4109	24.3319	24.1249	24.4476	24.3894	24.1969	24.298	24.5284	24.2836	24.4863	24.5401						+					halfMIC_Ctrl	10	10	10	38.9	38.9	38.9	37.017	0	77.661
24.7688	24.6564	24.8833	24.6454	24.731	24.5707	24.5746	24.5841	24.7589	24.7068	24.7203	24.8103	24.859	24.7658	24.7768	25.0587	24.9374	24.8127	24.702	24.8991	24.8602	24.97	24.9452	24.8986	24.7051	24.8558	24.6813	24.7395	24.9976	24.8175						+	+				halfMIC_Ctrl;MIC_Ctrl	19	19	19	38.2	38.2	38.2	79.112	0	196.34
23.7849	23.9243	23.4142	23.9437	24.0867	24.0822	23.7935	23.793	24.1432	23.7846	23.9732	23.9483	24.0173	23.995	24.1079	24.02	23.9563	24.0664	23.9883	23.8665	24.0088	24.2122	24.2226	24.0465	23.6975	23.8617	23.9492	23.9113	24.0346	23.8928												17	17	17	30.1	30.1	30.1	90.434	0	52.596
21.714	21.9914	21.8167	21.9288	22.4186	21.8832	22.0109	22.0312	21.9821	21.994	21.7922	21.7535	22.4307	21.9627	22.0966	22.0942	22.0852	22.3713	22.085	22.3494	22.3922	22.5243	21.9245	22.067	21.8087	21.9886	22.5495	21.7305	21.9129	22.2332												6	6	6	28.2	28.2	28.2	32.483	0	29.668
28.0299	28.0967	27.9835	28.1096	28.08	27.9222	28.1279	27.9995	28.0386	28.0067	28.1302	27.986	27.8795	27.9899	28.0868	28.1887	27.9749	28.1216	27.989	28.2195	28.1067	28.1582	28.02	28.2373	27.9131	28.0281	28.0805	28.1265	27.9548	27.958												14	14	14	79.9	79.9	79.9	25.886	0	323.31
23.3894	23.2614	23.7385	22.9905	22.8395	23.1639	23.0032	23.2304	23.1941	23.3101	23.1221	23.3045	22.8675	22.9475	22.7398	22.764	22.6028	22.9331	22.7178	23.148	23.4788	22.5633	22.1041	22.8441	23.1767	22.8086	22.5914	23.026	22.7657	23.413						+					halfMIC_Ctrl	6	6	6	40	40	40	23.024	0	54.385
23.0258	23.4113	23.5433	23.3306	23.3897	23.0762	23.3935	23.0792	23.331	23.2758	23.4665	23.0615	23.524	23.3578	23.1787	23.3008	23.432	23.2502	23.3586	23.2497	23.2888	22.9475	23.0067	23.1846	23.2842	23.302	23.3774	23.2748	23.4875	23.4343												8	8	8	23.5	23.5	23.5	48.617	0	31.908
22.925	22.9517	22.9224	23.129	22.9651	23.4545	23.1592	23.0404	23.1146	22.8237	23.2637	22.772	23.173	23.3171	23.2014	23.43	23.1647	23.1957	23.2876	23.0449	23.4714	23.6029	23.3346	23.5854	22.8896	23.2636	23.0895	23.3149	23.1481	23.1662						+	+				halfMIC_Ctrl;MIC_Ctrl	3	3	3	18	18	18	22.955	0	12.328
21.6097	21.8086	19.934	21.6521	17.9478	20.9269	21.3107	21.2814	21.652	19.9853	19.0872	21.6621	21.4361	19.2393	21.2892	21.2963	20.1188	20.5816	21.4154	19.4057	21.7621	20.6416	21.7086	18.7719	19.6187	21.6111	21.5876	20.0513	21.6566	21.3881												4	4	4	31	31	31	15.865	0.0018215	2.4998
20.403	21.0705	19.6984	19.7704	21.1746	20.6897	19.9699	18.9629	20.798	21.256	21.5574	20.9416	19.8117	20.0213	21.1507	19.0508	20.3195	20.3881	19.9489	18.7093	20.9868	19.5683	20.934	19.6407	20.155	19.4508	20.2392	21.0113	19.6121	21.4535												5	5	5	18.6	18.6	18.6	46.277	0	4.7885
22.652	22.9038	22.6955	22.6536	22.653	22.4917	22.8405	22.6442	22.7578	22.5195	22.9172	22.4978	22.8137	22.9185	22.6414	22.9101	22.8489	22.7702	22.8487	22.681	22.8386	22.7771	22.9366	22.9469	22.7038	22.9103	22.6893	22.6343	22.7566	22.8068						+	+				halfMIC_Ctrl;MIC_Ctrl	6	6	6	12.6	12.6	12.6	69.098	0	65.042
26.6327	26.9765	26.748	26.9146	27.1014	26.7739	26.7557	26.7292	27.0084	26.864	27.0743	26.8428	27.0482	26.9211	27.0874	26.7992	26.9925	27.0549	26.9629	27.0412	26.9508	26.8763	26.8948	27.1934	26.7256	27.0331	27.0376	26.9191	27.0406	26.9094												12	12	12	76.2	76.2	76.2	28.022	0	111
22.7665	22.3268	22.3223	20.601	22.4444	22.3751	22.0752	22.3825	22.1799	22.1778	22.0598	22.4145	22.4818	22.5351	22.0362	21.9788	22.3386	22.0458	22.0302	21.4915	22.2682	21.8883	22.0345	21.9808	22.9125	22.4558	21.9399	22.6457	22.0082	21.8443												4	4	4	24	24	24	16.045	0	7.569
21.9349	22.3616	22.1865	22.1375	22.097	22.0437	22.0999	21.9356	22.3895	22.0951	22.2098	21.9	22.3996	22.5358	22.3005	22.4247	22.5136	22.459	22.4864	22.5335	21.9225	22.4272	22.3662	22.3535	22.0433	22.0845	22.3353	22.2067	22.4823	22.1067						+	+				halfMIC_Ctrl;MIC_Ctrl	6	6	6	24.6	24.6	24.6	31.594	0	42.213
25.3425	25.4676	25.5073	25.4915	25.5045	25.404	25.374	25.3843	25.5625	25.5644	25.4451	25.4477	25.4555	25.2297	25.2811	25.5733	25.383	25.516	25.4705	25.3202	25.4484	25.4703	25.4697	25.3562	25.3273	25.4891	25.4684	25.3587	25.4762	25.476												15	15	15	50.9	50.9	50.9	44.946	0	138.99
25.6771	25.2547	26.2071	25.5207	25.3032	25.1743	25.4687	25.9842	25.0362	25.5326	24.9546	25.8414	24.7778	25.2039	24.7668	24.5773	25.1188	24.7107	24.2914	25.0687	25.0823	24.6429	24.4246	24.5978	25.9365	25.0572	24.9752	25.6605	24.887	25.1854						+	+				halfMIC_Ctrl;MIC_Ctrl	14	14	14	57.9	57.9	57.9	21.306	0	111.04
21.6033	21.9305	21.6151	21.9099	22.135	22.054	22.1487	21.8128	22.0573	21.9374	21.8683	21.5896	22.2509	21.8596	22.2161	22.1997	21.9225	22.2162	22.2381	21.8817	21.8276	22.2995	22.1242	22.2051	21.6917	22.0451	22.0091	21.6734	22.2948	21.8828						+					halfMIC_Ctrl	6	6	6	23.5	23.5	23.5	43.657	0	22.2
26.3455	26.501	26.5167	26.5401	26.5329	26.4759	26.5372	26.3738	26.4447	26.5307	26.546	26.4224	26.5506	26.5465	26.345	26.3008	26.6012	26.5256	26.4605	26.3605	26.4539	26.5514	26.5365	26.3662	26.4236	26.397	26.5652	26.4355	26.6299	26.4306												11	11	11	66.5	66.5	66.5	20.554	0	131.82
22.6334	22.6819	22.789	22.9377	22.982	22.6022	22.8194	22.6127	22.8294	22.7645	23.0734	22.6548	23.011	22.8254	23.0688	22.9914	23.1423	23.0839	23.0939	22.8052	22.7615	23.1907	23.12	23.1714	22.8211	22.8105	22.9508	22.6517	23.0592	22.9765						+	+				halfMIC_Ctrl;MIC_Ctrl	6	6	5	28.1	28.1	25.2	31.467	0	14.861
21.2331	20.4866	19.9258	21.0085	20.7565	20.6311	20.7066	20.7373	20.7414	20.5043	20.7596	20.8526	21.1984	19.7597	20.4457	19.5283	20.8164	21.1528	18.618	20.8961	20.9267	20.9989	21.4445	21.2268	19.9254	20.9393	21.0823	21.4149	21.0094	21.1007												4	4	4	12.1	12.1	12.1	63.513	0	24.765
20.3155	21.8817	20.9577	21.9087	20.008	20.9638	21.7261	22.2263	19.2112	19.6112	19.7893	22.569	21.7221	19.8091	20.4604	20.2832	21.4584	20.3159	21.2191	21.6933	20.11	19.6356	20.9943	19.7298	20.6229	21.8464	19.7755	20.6395	20.5459	18.7548												6	6	6	29.8	29.8	29.8	27.207	0	18.116
19.9864	20.4464	20.9048	19.9063	20.1908	20.0353	20.4093	20.4813	20.2271	20.2817	20.3045	19.4881	20.4889	20.5333	20.6943	20.5339	20.5245	20.4859	20.3432	20.2698	20.6453	20.4637	20.3791	21.1342	20.2852	20.2629	20.2697	20.9309	20.6853	21.3867						+					halfMIC_Ctrl	3	3	3	13.6	13.6	13.6	44.547	0	3.3504
21.2387	21.7531	21.6452	21.8166	21.4477	21.5516	21.4644	21.6502	21.4983	21.5402	21.4863	21.6931	21.5155	21.7426	21.2894	21.711	21.4999	21.5637	21.7939	21.644	21.8993	21.4701	21.641	21.7721	21.5267	21.9165	21.7112	21.5535	21.6308	21.7595												5	5	5	25.4	25.4	25.4	33.683	0	18.977
20.4002	20.7929	19.1368	20.8598	21.4229	20.781	20.7812	20.8015	20.8636	20.4816	20.48	20.3997	20.8053	20.7078	20.5954	20.6081	20.8681	21.003	20.7226	20.6839	20.8071	20.732	20.912	20.6589	20.8274	21.1951	19.2664	20.674	20.7856	21.0976												4	4	4	35.3	35.3	35.3	18.203	0	5.9378
23.1875	23.3113	23.8151	23.3824	23.5052	23.3724	23.6399	23.0838	23.376	23.3885	23.7831	23.4686	23.6609	23.8083	24.0245	23.8469	23.9057	24.0276	23.7034	23.6638	23.6044	24.0223	23.6517	23.552	23.2767	23.6713	23.904	23.4352	23.718	23.5376						+	+				halfMIC_Ctrl;MIC_Ctrl	6	6	6	24.3	24.3	24.3	42.493	0	18.023
20.9779	18.6596	21.158	19.5962	19.9984	20.8352	20.482	19.5709	19.1639	21.3948	19.6276	20.3449	20.8267	20.7406	20.6707	20.9857	20.9136	20.9491	21.002	20.0869	19.6057	20.6595	20.8139	20.4266	20.8022	20.9895	20.95	20.8621	18.7099	20.0579												2	2	2	38.9	38.9	38.9	14.366	0	6.5656
25.8367	25.5144	25.7319	25.5414	25.5556	25.4081	25.3842	25.5128	25.7377	25.6131	25.6404	25.6003	25.4677	25.633	25.7226	25.9092	25.6358	25.7925	25.6998	25.6719	25.7705	25.7911	25.6518	25.9806	25.7018	25.42	25.599	25.7885	25.5087	25.7116							+				MIC_Ctrl	13	13	13	38.9	38.9	38.9	37.854	0	129.83
25.5039	25.9677	25.6052	25.9737	26.1935	25.7802	25.8392	25.6882	25.9165	25.8264	25.9945	25.8984	26.1852	26.0268	26.0449	26.1229	26.0631	26.1519	26.0533	25.9653	25.8655	26.151	26.179	26.0813	25.7233	26.1196	26.156	25.8483	26.2232	26.0058						+					halfMIC_Ctrl	23	23	23	40.2	40.2	40.2	69.819	0	230.14
26.9117	27.3465	27.0858	27.2344	27.3047	27.1494	26.7744	27.1558	27.3091	27.2333	27.3634	27.3318	27.7355	27.3922	27.3987	27.4392	27.275	27.2646	28.224	28.5431	28.5474	28.009	28.2707	28.3379	27.0227	27.4083	27.3741	27.1791	27.4424	27.4606						+	+			+	halfMIC_Ctrl;MIC_Ctrl;MIC_halfMIC	6	6	6	50.6	50.6	50.6	10.608	0	36.427
23.137	23.2959	22.8767	23.5662	23.466	23.5437	23.493	23.2805	23.3127	23.2717	23.4764	23.192	23.6291	23.6384	23.7426	23.7547	23.7882	23.709	23.7843	23.6486	23.5178	23.9539	23.9591	23.8214	23.2526	23.7647	23.561	23.4859	23.7412	23.374						+	+				halfMIC_Ctrl;MIC_Ctrl	11	11	11	42.8	42.8	42.8	47.003	0	96.783
27.3377	27.6978	27.3352	27.6455	27.8103	27.6106	27.6082	27.4474	27.6792	27.6112	27.6571	27.5359	27.7926	27.8201	27.8035	27.9131	27.7506	27.8563	27.7534	27.823	27.7538	27.9716	27.845	28.0019	27.5464	27.7268	27.7374	27.705	27.7169	27.7						+	+				halfMIC_Ctrl;MIC_Ctrl	26	26	26	68.9	68.9	68.9	52.82	0	323.31
25.2778	25.5847	25.3864	25.5572	25.627	25.4229	25.3941	25.4391	25.5557	25.5461	25.5226	25.469	25.6857	25.7332	25.7532	25.8507	25.7543	25.7261	25.6932	25.8983	25.7944	25.8096	25.747	25.7405	25.8122	25.6352	25.6476	25.7097	25.6949	25.7356					+	+	+	+			halfMIC_Ctrl;MIC_Ctrl;quarterMIC_Ctrl;quarterMIC_eighthMIC	13	13	13	54.7	54.7	54.7	35.612	0	252.78
24.4032	24.5356	24.4615	24.6334	24.5223	24.3979	24.3817	24.3653	24.529	24.5085	24.5691	24.5427	24.4477	24.4852	24.557	24.6299	24.492	24.5302	24.5904	24.6262	24.4488	24.8141	24.7634	24.6958	24.438	24.5716	24.4138	24.635	24.4713	24.5652							+				MIC_Ctrl	10	10	10	39.9	39.9	39.9	41.703	0	66.339
29.3634	29.2279	29.4988	29.3127	29.3176	29.1661	29.0614	29.2276	29.3956	29.4528	29.3444	29.3227	29.2357	29.2899	29.1028	29.3391	29.2753	29.2459	29.1239	29.0024	29.1935	29.2077	29.2242	29.2437	29.5027	29.0855	29.2645	29.4357	29.296	29.4372							+				MIC_Ctrl	11	11	11	67.3	67.3	67.3	17.794	0	117.78
22.1091	22.8868	22.4782	22.7843	23.0004	22.5313	22.7912	22.5751	22.6293	22.5356	22.8351	22.5799	22.7217	22.8456	22.8272	22.9019	22.8402	23.0315	22.6585	22.9179	22.8766	22.9591	22.8122	22.8774	22.6465	22.8537	22.9304	22.8663	22.7788	22.6031												7	7	7	40.9	40.9	40.9	26.227	0	33.335
19.8725	20.8539	20.1083	20.7199	20.7345	20.3642	21.601	20.3413	19.835	19.2218	20.7895	20.4656	20.6983	18.9314	20.9828	21.1296	21.1365	21.0499	20.4669	21.0493	20.8697	21.5011	21.2207	20.681	20.4452	20.477	20.6733	20.8473	20.6394	20.4016							+				MIC_Ctrl	2	2	2	12.2	12.2	12.2	32.357	0.00091659	2.6117
21.3488	21.6324	22.3498	21.9449	21.7903	19.6425	21.3211	21.4944	21.7389	21.6128	21.3619	21.5965	21.4115	21.6576	20.9972	21.6183	21.4406	21.3851	21.358	21.7778	21.9355	21.2849	21.6581	21.2785	21.3675	21.5463	21.1885	21.3225	21.5187	21.451												6	6	6	15.1	15.1	15.1	55.26	0	14.321
21.1541	22.2809	22.1538	22.5075	22.3284	22.4026	22.1424	22.0068	22.3312	22.1041	22.1776	22.2811	22.6881	22.2241	22.5257	22.3293	22.4662	22.5772	22.4306	22.4477	22.3995	22.0152	22.4105	21.9209	22.2306	22.1752	22.4266	22.3975	22.3733	22.6166												10	10	10	28.4	28.4	28.4	42.958	0	19.117
23.8866	24.0507	23.9499	24.1515	24.1108	24.1094	24.0383	23.9566	24.1503	23.9963	24.1823	23.8698	24.0628	24.2468	24.2039	24.4038	24.1181	24.2641	24.2293	24.175	24.2758	24.3636	24.3401	24.3202	24.025	24.0959	24.1313	24.0506	24.0985	24.1357						+	+				halfMIC_Ctrl;MIC_Ctrl	13	13	13	60.1	60.1	60.1	32.451	0	99.75
19.9616	20.0087	20.7613	19.8924	20.0612	20.7875	21.065	20.2868	19.8732	19.6628	20.2128	20.1132	20.3119	18.8944	19.7581	20.4178	19.7459	20.5596	20.1631	20.9463	20.9034	18.7666	20.4953	20.6123	21.1897	20.2837	19.9174	19.9764	20.3096	20.2127												2	2	2	11.3	11.3	11.3	37.558	0	4.5861
20.0121	20.0532	20.4101	20.5225	19.8279	19.7151	20.2302	19.9923	19.9255	20.103	20.0473	20.1115	20.1538	20.3285	20.0134	20.1407	20.0212	20.1129	19.7532	20.0731	19.9415	19.9203	20.5726	21.0553	19.9783	20.5983	19.2019	19.0534	21.0514	19.9162												3	3	3	20	20	20	33.626	0	5.958
20.8248	19.6628	21.5981	20.5129	20.5481	21.3424	20.9891	20.768	20.2129	21.1615	20.9627	20.0833	21.7	21.0081	21.1003	21.0393	20.9635	21.2368	19.8042	21.3818	21.833	21.0267	21.7451	20.0017	18.9627	21.1794	21.2537	19.7523	21.1947	20.2042												5	5	5	19.9	19.9	19.9	36.053	0	4.9156
24.52	24.7454	24.5969	24.8372	24.9281	24.6976	24.644	24.7019	24.7229	24.796	24.7919	24.7278	24.9646	25.0268	25.1043	25.0795	25.1083	25.1203	25.0804	24.9548	24.9367	25.139	25.137	25.1362	24.8201	25.0496	25.0456	24.7338	24.9412	24.9325					+	+	+				halfMIC_Ctrl;MIC_Ctrl;quarterMIC_Ctrl	21	21	21	57	57	57	59.748	0	231
21.2042	21.9407	21.2275	20.2761	22.175	21.6086	19.9343	21.4206	21.7591	21.905	21.6888	22.094	22.3482	22.4518	22.408	21.5698	22.3981	21.6679	22.1379	22.5288	22.1035	22.7166	22.4715	22.3337	21.6158	22.2524	22.3398	21.8692	22.399	21.5499						+	+				halfMIC_Ctrl;MIC_Ctrl	4	4	4	26.8	26.8	26.8	26.857	0	10.064
26.3943	26.2984	26.1072	26.2085	26.1848	25.9962	26.2739	26.0285	26.2545	26.2055	26.3616	26.129	26.3506	26.3165	26.3845	26.5156	26.3656	26.4112	26.4326	26.2938	26.3176	26.3	26.5598	26.5815	26.4074	26.3864	26.4107	26.2304	26.38	26.2477						+	+				halfMIC_Ctrl;MIC_Ctrl	13	13	13	59.1	59.1	59.1	23.974	0	207.22
22.2236	22.3556	21.9493	22.0208	22.4143	22.6558	22.7161	19.0801	22.5461	22.795	22.8518	23.0941	22.7323	22.7335	22.9264	22.7788	22.8574	22.7152	22.5445	22.6579	22.8733	22.5478	22.9884	22.9569	22.4897	22.8072	22.8366	22.7552	22.7449	22.7229					+	+	+				halfMIC_Ctrl;MIC_Ctrl;quarterMIC_Ctrl	7	7	7	33.2	33.2	33.2	35.778	0	26.16
24.7868	24.5358	24.9093	24.8448	24.9755	25.0298	24.8409	24.8405	24.9352	24.7605	24.8564	24.9127	24.8002	24.8361	25.0681	24.6322	24.9248	24.8248	24.8102	24.76	25.1396	24.8078	24.884	25.1999	24.7886	24.9949	24.6172	24.9187	24.873	24.8234												7	7	7	53.8	53.8	53.8	26.32	0	77.764
19.6248	18.7456	20.1801	21.009	21.3708	20.5707	21.3929	21.3084	19.2687	19.4397	21.2563	19.3164	21.4715	20.6486	20.6303	19.9921	21.5861	21.524	21.776	21.186	21.491	20.9131	19.494	21.4074	20.1857	21.6024	21.3434	20.6812	21.4229	19.787												3	3	2	11.6	11.6	9.4	35.562	0	7.1338
22.0631	21.9461	21.7848	22.1223	22.0259	21.4828	22.3421	21.6607	21.7498	21.7905	21.8917	21.8807	21.9227	21.666	22.0849	21.8674	22.106	22.2219	21.8452	21.7854	22.0115	22.2247	22.1205	21.9432	21.3324	22.1138	21.9596	21.7316	22.2052	21.8782												6	6	6	33	33	33	32.202	0	29.08
23.1803	23.4386	23.3758	23.7242	23.3232	23.8029	23.5972	23.2933	23.603	23.4423	23.6422	23.3578	23.5831	23.45	23.4923	23.4918	23.755	23.7656	23.6462	23.577	23.5964	23.6078	23.7561	23.4625	23.4237	23.741	23.625	23.5211	23.6141	23.4041												7	7	7	37.9	37.9	37.9	21.703	0	44.667
23.1444	23.2001	24.4101	23.6341	23.6488	22.7068	23.2982	23.7232	23.2608	23.3283	23.138	23.7917	23.7432	23.5055	23.4113	22.8812	23.2765	23.3016	22.7486	24.129	24.4502	23.4689	22.8966	23.4007	23.3109	23.7934	23.6503	23.21	23.6655	23.2443												4	4	4	41.9	41.9	41.9	13.385	0	62.272
24.1049	24.2516	24.1281	24.0583	24.2416	24.2061	24.2788	23.9922	24.1865	24.2887	24.2123	24.0737	24.1408	24.2912	24.1633	24.2772	24.0899	24.1645	24.0537	24.172	24.2738	24.3855	24.166	24.2544	23.9516	24.1697	24.3406	23.9813	24.1819	24.1755												11	11	11	62.3	62.3	62.3	30.696	0	38.227
23.9981	23.9337	24.43	23.8824	24.1	23.8793	23.9717	24.0422	24.1323	24.1444	24.0409	23.9551	24.0628	24.1719	23.9946	24.0992	24.1516	24.114	24.2581	24.0527	24.0114	24.114	23.8673	24.0318	24.1146	24.1687	24.1639	24.2915	24.0975	24.1603												10	10	10	42.2	42.2	42.2	33.38	0	32.612
20.5608	20.8822	19.313	20.9358	20.9	20.7956	19.8954	20.0473	19.8219	21.0901	20.9905	21.2916	21.4694	21.5757	21.0449	21.2036	21.5649	20.6517	21.0707	21.2072	20.2674	21.0324	21.4084	20.9517	20.0299	20.8197	21.0223	20.4131	19.3632	19.8149						+					halfMIC_Ctrl	5	5	5	9	9	9	74.46	0	13.874
23.6593	24.1455	23.6289	24.1039	24.1489	24.1092	23.7686	23.8384	23.9899	24.1409	24.1589	23.9762	24.3501	24.3169	24.3756	24.5097	24.3452	24.5042	24.2965	24.1865	24.1459	24.0874	24.3377	24.3947	24.1672	24.4291	24.371	24.2082	24.3572	24.1825					+	+	+				halfMIC_Ctrl;MIC_Ctrl;quarterMIC_Ctrl	11	11	11	31.1	31.1	31.1	64.555	0	73.349
22.5149	23.0011	23.3672	22.6554	22.9183	22.3145	22.6044	22.8344	22.9838	23.0075	22.7311	22.5014	22.9792	22.8232	23.0561	22.842	22.8796	23.1035	23.0818	23.247	22.5801	22.6425	23.1864	22.7652	22.9412	23.1581	23.0713	23.0724	23.0831	22.9502												4	4	4	27.6	27.6	27.6	25.275	0	15.09
22.0505	21.7344	22.2559	22.1346	21.9531	21.7468	21.7238	21.9312	22.1215	22.0665	22.0404	21.9287	22.2917	22.2247	22.349	22.3267	22.169	21.9489	22.3164	22.537	22.838	21.9934	22.3148	22.1493	22.5228	22.0613	22.2455	20.3684	22.3642	21.7183						+	+				halfMIC_Ctrl;MIC_Ctrl	8	8	8	44.6	44.6	44.6	29.779	0	25.739
26.8287	26.3603	26.7816	26.4429	26.4714	26.1738	26.4547	26.4282	26.573	26.5712	26.5459	26.4207	26.2966	26.399	25.9809	26.4471	26.3799	26.3602	26.3847	26.4183	26.4192	25.9002	26.1742	26.1113	26.4109	26.4028	26.0493	26.6094	26.3083	26.4773							+				MIC_Ctrl	6	6	6	41.7	41.7	41.7	20.213	0	48.36
21.8238	21.9009	21.402	21.802	22.205	22.1306	22.1497	20.5295	22.0692	22.0786	22.1936	22.0785	22.2953	22.5755	22.458	22.3104	22.2113	22.3801	22.434	21.9592	22.7598	22.3835	22.1564	22.3191	21.9944	22.3722	22.1365	22.2086	22.3169	22.2634					+	+	+				halfMIC_Ctrl;MIC_Ctrl;quarterMIC_Ctrl	5	5	5	22.4	22.4	22.4	39.279	0	5.7889
22.5911	22.9625	22.9394	22.9098	22.8885	22.8969	22.9604	22.6313	22.9881	23.1174	22.715	22.725	22.6578	22.9611	23.2717	23.1405	23.0864	23.1394	22.7993	23.0908	22.9045	22.8059	23.1379	22.9703	22.9491	22.641	23.0361	23.0256	22.979	23.2498												10	10	10	24.4	24.4	24.4	54.813	0	40.37
19.9398	20.0498	20.9517	20.1169	19.9236	19.126	19.9575	19.8536	19.8847	19.9689	19.7439	20.8488	20.1559	20.0974	20.4575	20.2888	19.8074	20.0455	20.9326	19.9334	18.7208	20.7204	20.3503	21.6603	19.5009	20.0451	19.9794	19.9592	20.056	20.1288												2	2	2	17.9	17.9	17.9	18.102	0	3.1313
23.975	24.425	24.2671	24.4916	24.6233	24.4565	24.4258	24.2887	24.3078	24.2878	24.4675	24.5116	24.5714	24.5718	24.49	24.1998	24.341	24.5277	24.5585	24.4904	24.6018	24.5945	24.6491	24.47	24.4013	24.7363	24.3675	24.2123	24.5029	24.4356												9	9	9	38	38	38	33.481	0	89.369
24.4349	24.34	24.5998	24.5739	24.4573	24.267	24.5753	24.2618	24.3659	24.3638	24.745	24.4048	24.1272	24.4386	24.3042	24.4381	24.4287	24.3944	24.4913	24.2081	24.434	24.6352	24.3246	24.5658	24.1753	24.4057	24.4171	24.2615	24.0789	24.3023					+						quarterMIC_Ctrl	4	4	4	46.3	46.3	46.3	13.89	0	35.405
24.0962	24.4397	24.1142	24.4524	24.7175	24.2598	24.3526	24.1223	24.4238	24.4193	24.4319	24.277	24.5865	24.63	24.5788	24.5746	24.6389	24.7309	24.6082	24.6155	24.531	24.6798	24.8302	24.7326	24.1823	24.7019	24.6289	24.2787	24.6326	24.5225						+	+				halfMIC_Ctrl;MIC_Ctrl	15	15	15	37.1	37.1	37.1	53.685	0	170.19
29.4889	28.975	29.7541	29.0934	28.9198	28.7235	29.1649	29.3602	29.0824	29.007	29.0394	29.223	29.0326	29.2621	29.2983	29.1352	29.0604	29.1352	28.7578	29.3252	29.3139	29.1023	28.5664	28.542	29.4753	28.7295	28.9944	29.4274	29.0743	29.0046												10	10	10	86.8	86.8	86.8	10.235	0	195.28
24.0066	24.0794	24.1932	24.2928	23.9691	24.192	24.1079	23.938	24.2043	24.106	24.2992	24.1096	24.2926	24.2156	24.0972	24.1759	24.0511	24.2855	24.1584	24.3741	24.2587	23.8117	24.2185	24.2549	24.1151	24.0011	24.1844	24.2305	24.1144	24.405												14	14	14	56.7	56.7	56.7	32.506	0	107.46
20.4793	18.7604	18.5332	19.7132	16.7638	19.846	17.2085	17.4724	21.6157	17.1963	19.8005	20.3857	17.2664	21.0059	17.0037	16.92	17.0816	16.877	21.638	19.6556	21.144	16.7921	19.3521	16.4759	19.8501	20.5131	19.2467	17.3298	17.4735	20.7245												2	2	2	10.7	10.7	10.7	16.052	0.0060397	1.6737
22.6584	22.4286	22.9387	22.6765	22.7218	23.0047	23.3948	22.279	22.624	22.6058	22.5268	23.0803	22.7881	22.5143	22.7714	22.3186	22.6146	22.437	22.9133	22.9931	23.2117	23.0159	22.7206	22.9017	22.4393	22.9532	22.718	22.4702	22.8229	22.381							+				MIC_Ctrl	9	9	9	35.7	35.7	35.7	47.856	0	27.428
23.8007	24.3429	24.5302	24.4165	24.2328	24.1674	24.1986	24.0495	24.3665	24.4336	24.5002	23.9974	24.0517	23.8191	24.049	24.2526	24.0754	24.2254	24.1329	23.8418	24.0763	23.5486	23.8611	23.9145	23.8361	24.1323	24.1569	24.2131	24.3631	24.6303							+				MIC_Ctrl	8	8	8	36.7	36.7	36.7	20.089	0	19.208
20.5617	19.9689	19.9189	19.9182	20.1425	19.6731	19.6916	19.592	20.8559	19.9876	21.1795	19.0223	20.2933	20.0459	20.8295	20.3277	20.6694	20.0675	19.6881	20.3069	20.3405	19.7992	20.3459	19.6623	20.7277	20.7068	19.1135	19.8543	19.7806	19.6211						+					halfMIC_Ctrl	4	4	4	10.4	10.4	10.4	46.618	0	4.5976
23.8145	24.4631	24.0661	24.5011	24.8406	24.0654	24.2335	24.09	24.4025	24.3233	24.2909	24.3457	24.6858	24.4059	24.2784	24.219	24.4976	24.6831	24.5426	24.682	24.5294	24.4312	24.5225	24.59	23.9039	24.4854	24.5523	24.0458	24.6926	24.2833												7	7	7	55	55	55	16.484	0	78.401
23.1089	23.4799	23.1399	23.3586	23.5893	23.5097	23.2456	23.1494	23.4904	23.6288	23.3213	23.3081	23.5656	23.5362	23.4087	23.5756	23.6067	23.6728	23.4692	23.4701	23.2678	23.7124	23.5594	23.6175	23.1596	23.1441	23.5922	23.4695	23.7028	23.3914						+					halfMIC_Ctrl	6	6	6	26.7	26.7	26.7	36.839	0	48.709
20.228	21.0276	19.5348	19.43	20.8995	20.6196	21.0719	19.9589	20.4471	18.9362	20.7348	20.7495	21.1164	19.8011	21.0358	21.062	20.9478	20.7222	21.31	20.7792	20.9176	21.0042	21.39	19.4231	21.3552	20.8376	21.0495	20.3893	21.8275	20.5666												4	4	4	15.4	15.4	15.4	40.259	0	33.459
26.3926	26.2407	26.0924	26.058	25.9769	25.953	26.3084	25.9729	26.2362	26.0387	26.2887	25.8299	26.0674	26.1363	25.9111	26.5773	26.3248	26.3822	26.2781	26.3829	26.5372	26.7099	26.3687	26.5317	26.3847	26.0823	26.2546	26.4086	26.2987	26.1966							+				MIC_Ctrl	6	6	6	44.7	44.7	44.7	13.151	0	102.95
23.5934	23.8973	23.6631	23.9017	23.9853	23.9393	23.9569	23.4806	24.0303	23.7863	23.8293	23.8675	24.0547	24.1995	24.0442	24.1917	24.1648	24.1196	24.1683	24.0742	24.1269	24.2649	24.1761	24.3176	23.7543	24.1571	23.9587	23.9808	24.0777	23.8363						+	+				halfMIC_Ctrl;MIC_Ctrl	8	8	8	32	32	32	34.198	0	19.675
20.7375	23.1869	23.3823	20.7732	23.7109	22.6618	22.9377	23.0407	22.9535	22.959	19.9552	22.8165	22.7305	20.2535	19.7753	22.6928	19.9239	19.2672	19.9959	22.9069	21.1241	19.8073	22.8088	23.015	19.7508	22.8619	22.9285	19.8639	22.9474	22.9656						+					halfMIC_Ctrl	4	4	4	36.8	36.8	36.8	9.8563	0	3.1951
24.8403	24.9832	25.1807	25.138	25.1957	25.1703	25.0461	24.982	25.1911	25.0985	25.2422	24.966	25.2391	25.1486	25.2737	25.4185	25.1207	25.3448	25.2554	25.3812	25.5209	25.547	25.3506	25.5313	25.1962	25.1981	25.0883	25.0486	25.1637	25.0597						+	+				halfMIC_Ctrl;MIC_Ctrl	18	18	18	53	53	53	47.235	0	122.48
25.0456	25.5454	25.1899	25.618	25.8448	25.359	25.547	25.2833	25.5215	25.3947	25.4897	25.3963	25.8403	25.831	25.7856	25.7941	25.8054	25.9479	25.773	25.7521	25.8265	26.1066	26.0486	25.6399	25.2735	25.9395	25.7794	25.4245	25.8888	25.4427						+	+				halfMIC_Ctrl;MIC_Ctrl	10	10	10	87.2	87.2	87.2	20.911	0	307.97
26.4579	25.5439	27.4735	25.6447	25.4914	25.3162	25.7752	26.3902	25.8605	26.2948	25.4493	26.2449	25.2721	25.402	25.0843	24.6552	25.1089	24.8251	24.2456	25.0759	25.2608	24.7135	24.1924	24.5446	26.2304	25.6523	25.4806	25.8713	25.575	25.6007						+	+				halfMIC_Ctrl;MIC_Ctrl	13	13	13	65	65	65	15.733	0	203.76
21.7017	22.33	22.4052	22.458	22.3156	22.2877	21.997	22.1695	22.1571	22.1967	22.5426	22.4092	22.5915	22.365	22.731	22.5206	22.5091	22.7529	22.6639	22.8065	22.7576	22.7273	22.783	22.7699	22.0319	22.6733	22.5952	22.3393	22.6434	22.6082						+	+				halfMIC_Ctrl;MIC_Ctrl	4	4	4	26.8	26.8	26.8	17.243	0	19.804
22.0567	22.1089	22.0616	22.2416	22.3397	22.3245	22.1051	21.6987	22.7552	22.2864	22.0074	22.2543	22.0678	22.067	22.2042	22.4748	21.9732	22.1814	22.3682	22.1452	22.1708	22.7045	22.5292	22.4778	22.0274	21.7661	22.2853	22.3931	22.2146	22.155							+				MIC_Ctrl	9	9	9	21.7	21.7	21.7	72.597	0	56.537
23.5762	24.0728	23.8222	24.0463	24.0706	23.673	23.715	23.7071	23.998	23.9959	23.8765	23.9856	24.2303	24.1382	24.0286	24.0784	24.1317	24.1548	24.0033	24.0883	23.996	24.1115	24.2702	24.1659	23.7776	24.1962	24.1939	24.008	24.2891	24.1486						+	+				halfMIC_Ctrl;MIC_Ctrl	11	11	11	51	51	51	28.161	0	64.764
22.1631	22.055	22.7592	21.9851	21.7876	21.9287	22.5292	22.6246	22.6766	19.7553	22.4052	22.7515	22.0471	21.8008	21.7085	21.9062	21.9381	21.8932	21.7929	22.6505	22.4641	22.1795	22.1806	21.5657	22.3727	22.1669	21.7972	22.1822	21.6829	22.06												7	7	7	36.1	36.1	36.1	38.61	0	12.06
26.0122	26.412	26.2773	26.4794	26.4823	26.2155	26.3322	26.171	26.4311	26.3096	26.2934	26.3315	26.3564	26.2077	26.2593	26.0693	26.2298	26.2112	26.252	26.6108	26.6308	26.2944	26.1445	26.4209	26.2288	26.3328	26.2385	26.2009	26.3102	26.101												14	14	14	61.5	61.5	61.5	28.755	0	178.07
19.8644	20.8938	21.01	21.4451	21.4486	21.1815	21.364	21.3212	21.3784	21.1644	20.9656	19.6168	21.3281	21.2987	21.529	21.3098	21.2483	21.5471	21.3703	20.0709	21.7026	22.0935	21.3818	21.5218	20.8878	21.5445	21.7087	21.1847	21.5131	21.4172												6	6	6	24	24	24	42.412	0	10.387
22.6085	22.7882	22.6639	22.9306	22.9661	22.7399	22.3616	22.6205	22.8435	23.1417	22.7067	23.0337	23.0329	22.8508	22.674	22.8898	22.7689	22.9418	22.8328	23.0542	23.0769	22.8948	23.027	22.7976	22.738	22.7417	23.0444	22.788	22.8074	23.059							+				MIC_Ctrl	7	7	7	44.7	44.7	44.7	22.214	0	31.005
22.8185	22.9542	23.231	23.4621	23.2815	23.1751	23.0248	22.8022	23.2938	23.228	23.3592	23.2225	23.4368	23.2755	23.2447	23.4648	23.2929	23.4037	23.3545	23.2089	23.3378	23.4535	23.3354	23.3827	23.0573	23.3411	22.9538	23.1693	23.1809	23.2296						+					halfMIC_Ctrl	9	9	9	25.5	25.5	25.5	49.909	0	60.055
23.2496	23.6775	23.2389	23.6536	23.7124	23.5856	23.5746	23.452	23.6777	23.5269	23.5562	23.3359	23.95	23.882	23.9356	23.9341	23.8557	23.8879	23.9351	23.9881	23.7575	24.1448	23.9201	24.1421	23.4676	23.9791	23.8353	23.6136	23.8753	23.7578						+	+				halfMIC_Ctrl;MIC_Ctrl	12	12	12	33.2	33.2	33.2	66.903	0	170.73
21.2781	21.4611	20.0769	21.4091	22.0465	21.2292	21.2545	21.0885	21.8628	21.2042	20.9542	21.1403	21.3301	21.5498	21.7777	22.0606	21.572	21.5528	21.6842	21.3424	21.4943	21.7816	22.2585	21.6069	21.3976	21.5416	21.6782	21.6266	21.4408	21.4518												3	3	3	14.1	14.1	14.1	36.822	0	32.139
21.376	19.6658	19.9026	20.8089	22.1793	19.4953	19.3165	20.1002	20.0688	20.4722	19.9662	19.7357	20.9462	20.8365	19.4412	18.7623	20.0888	21.3556	19.9266	19.8888	20.3827	20.208	20.288	20.1743	20.0273	19.9954	19.9749	19.6182	19.2539	20.0904												3	3	3	7.1	7.1	7.1	62.376	0	19.515
20.7438	19.5514	20.4893	20.0082	20.0334	20.8794	19.833	20.461	21.035	19.6029	19.6043	19.6107	19.7178	21.6026	19.445	19.2127	19.8063	19.2144	19.928	20.4965	20.8943	19.8545	21.0861	20.5407	19.7139	19.8497	19.705	20.1768	19.8539	20.0045												3	3	3	12.3	12.3	12.3	25.549	0.0077519	1.6246
19.441	20.3366	20.8395	20.5348	20.0436	19.859	18.8237	20.0372	20.3952	19.5827	19.6387	20.6447	18.442	21.0006	19.2891	19.4293	21.0411	20.4464	19.8085	21.0048	20.2949	20.0097	21.2699	21.2807	20.1996	21.2251	20.1832	20.873	20.8987	20.2757												2	2	2	12.7	12.7	12.7	24.536	0.00091912	2.6625
19.8812	19.1341	19.6752	18.5836	18.9798	20.4511	20.0823	21.3558	19.3396	21.0666	19.6855	20.4238	21.081	20.453	20.9724	20.8713	21.2374	19.9365	19.781	21.2469	20.1665	20.2266	19.1606	21.1318	21.0803	18.9046	18.9592	19.903	20.0045	19.9518						+					halfMIC_Ctrl	2	2	2	8.2	8.2	8.2	41.152	0	9.0939
20.6504	20.6201	21.4449	20.9504	21.4685	19.5247	20.9894	19.7845	18.9513	19.691	21.5915	19.8745	21.1017	21.3522	19.5518	20.3918	19.6502	21.0782	19.5858	19.5697	22.2102	21.8314	21.9806	19.9358	21.9567	19.3925	19.6595	19.9791	19.4214	21.77												2	2	2	22	22	22	15.401	0	7.6888
[truncated: 293 more columns]

## Sheet: Fasta Headers
Fasta Header	Identifiers	Protein Name
sp|Q2FW03|TOP3_STAA8 DNA topoisomerase 3 OS=Staphylococcus aureus (strain NCTC 8325) GN=topB PE=3 SV=1	sp|Q2FW03|TOP3_STAA8	DNA topoisomerase 3 OS=Staphylococcus aureus (strain NCTC 8325) GN=topB PE=3 SV=1
sp|Q2FXJ0|MURC_STAA8 UDP-N-acetylmuramate--L-alanine ligase OS=Staphylococcus aureus (strain NCTC 8325) GN=murC PE=3 SV=1	sp|Q2FXJ0|MURC_STAA8	UDP-N-acetylmuramate--L-alanine ligase OS=Staphylococcus aureus (strain NCTC 8325) GN=murC PE=3 SV=1
sp|Q2FYR1|FEMB_STAA8 Aminoacyltransferase FemB OS=Staphylococcus aureus (strain NCTC 8325) GN=femB PE=1 SV=1	sp|Q2FYR1|FEMB_STAA8	Aminoacyltransferase FemB OS=Staphylococcus aureus (strain NCTC 8325) GN=femB PE=1 SV=1
sp|Q2FZ66|RLMN_STAA8 Probable dual-specificity RNA methyltransferase RlmN OS=Staphylococcus aureus (strain NCTC 8325) GN=rlmN PE=3 SV=1	sp|Q2FZ66|RLMN_STAA8	Probable dual-specificity RNA methyltransferase RlmN OS=Staphylococcus aureus (strain NCTC 8325) GN=rlmN PE=3 SV=1
sp|Q2FZE6|ISDE_STAA8 High-affinity heme uptake system protein IsdE OS=Staphylococcus aureus (strain NCTC 8325) GN=isdE PE=1 SV=2	sp|Q2FZE6|ISDE_STAA8	High-affinity heme uptake system protein IsdE OS=Staphylococcus aureus (strain NCTC 8325) GN=isdE PE=1 SV=2
sp|Q2G0P5|CLPC_STAA8 ATP-dependent Clp protease ATP-binding subunit ClpC OS=Staphylococcus aureus (strain NCTC 8325) GN=clpC PE=1 SV=1	sp|Q2G0P5|CLPC_STAA8	ATP-dependent Clp protease ATP-binding subunit ClpC OS=Staphylococcus aureus (strain NCTC 8325) GN=clpC PE=1 SV=1
sp|Q2G0Z5|NRFA_STAA8 NADPH-dependent oxidoreductase OS=Staphylococcus aureus (strain NCTC 8325) GN=nfrA PE=1 SV=1	sp|Q2G0Z5|NRFA_STAA8	NADPH-dependent oxidoreductase OS=Staphylococcus aureus (strain NCTC 8325) GN=nfrA PE=1 SV=1
tr|Q2FV40|Q2FV40_STAA8 Uncharacterized protein OS=Staphylococcus aureus (strain NCTC 8325) GN=SAOUHSC_02899 PE=4 SV=1	tr|Q2FV40|Q2FV40_STAA8	Uncharacterized protein OS=Staphylococcus aureus (strain NCTC 8325) GN=SAOUHSC_02899 PE=4 SV=1
tr|Q2FVK3|Q2FVK3_STAA8 Gamma-hemolysin h-gamma-ii subunit, putative OS=Staphylococcus aureus (strain NCTC 8325) GN=SAOUHSC_02708 PE=4 SV=1	tr|Q2FVK3|Q2FVK3_STAA8	Gamma-hemolysin h-gamma-ii subunit, putative OS=Staphylococcus aureus (strain NCTC 8325) GN=SAOUHSC_02708 PE=4 SV=1
tr|Q2FWL5|Q2FWL5_STAA8 ABC transporter, ATP-binding protein, putative OS=Staphylococcus aureus (strain NCTC 8325) GN=SAOUHSC_02274 PE=4 SV=1	tr|Q2FWL5|Q2FWL5_STAA8	ABC transporter, ATP-binding protein, putative OS=Staphylococcus aureus (strain NCTC 8325) GN=SAOUHSC_02274 PE=4 SV=1
tr|Q2FYH2|Q2FYH2_STAA8 Uncharacterized protein OS=Staphylococcus aureus (strain NCTC 8325) GN=SAOUHSC_01480 PE=4 SV=1	tr|Q2FYH2|Q2FYH2_STAA8	Uncharacterized protein OS=Staphylococcus aureus (strain NCTC 8325) GN=SAOUHSC_01480 PE=4 SV=1
tr|Q2FZD4|Q2FZD4_STAA8 DNA-dependent DNA polymerase beta chain, putative OS=Staphylococcus aureus (strain NCTC 8325) GN=SAOUHSC_01098 PE=4 SV=1	tr|Q2FZD4|Q2FZD4_STAA8	DNA-dependent DNA polymerase beta chain, putative OS=Staphylococcus aureus (strain NCTC 8325) GN=SAOUHSC_01098 PE=4 SV=1
tr|Q2G2H4|Q2G2H4_STAA8 DNA polymerase III subunit beta OS=Staphylococcus aureus (strain NCTC 8325) GN=SAOUHSC_00002 PE=3 SV=1	tr|Q2G2H4|Q2G2H4_STAA8	DNA polymerase III subunit beta OS=Staphylococcus aureus (strain NCTC 8325) GN=SAOUHSC_00002 PE=3 SV=1
tr|Q2G2Q2|Q2G2Q2_STAA8 Riboflavin biosynthesis protein OS=Staphylococcus aureus (strain NCTC 8325) GN=SAOUHSC_01249 PE=3 SV=1	tr|Q2G2Q2|Q2G2Q2_STAA8	Riboflavin biosynthesis protein OS=Staphylococcus aureus (strain NCTC 8325) GN=SAOUHSC_01249 PE=3 SV=1
sp|O05154|TAGX_STAA8 Putative glycosyltransferase TagX OS=Staphylococcus aureus (strain NCTC 8325) GN=tagX PE=3 SV=2	sp|O05154|TAGX_STAA8	Putative glycosyltransferase TagX OS=Staphylococcus aureus (strain NCTC 8325) GN=tagX PE=3 SV=2
sp|O05204|AHPF_STAA8 Alkyl hydroperoxide reductase subunit F OS=Staphylococcus aureus (strain NCTC 8325) GN=ahpF PE=3 SV=1	sp|O05204|AHPF_STAA8	Alkyl hydroperoxide reductase subunit F OS=Staphylococcus aureus (strain NCTC 8325) GN=ahpF PE=3 SV=1
sp|O06446|SECA1_STAA8 Protein translocase subunit SecA 1 OS=Staphylococcus aureus (strain NCTC 8325) GN=secA1 PE=1 SV=2	sp|O06446|SECA1_STAA8	Protein translocase subunit SecA 1 OS=Staphylococcus aureus (strain NCTC 8325) GN=secA1 PE=1 SV=2
sp|O07325|FTSA_STAA8 Cell division protein FtsA OS=Staphylococcus aureus (strain NCTC 8325) GN=ftsA PE=1 SV=2	sp|O07325|FTSA_STAA8	Cell division protein FtsA OS=Staphylococcus aureus (strain NCTC 8325) GN=ftsA PE=1 SV=2
sp|O33599|LYTM_STAA8 Glycyl-glycine endopeptidase LytM OS=Staphylococcus aureus (strain NCTC 8325) GN=lytM PE=1 SV=3	sp|O33599|LYTM_STAA8	Glycyl-glycine endopeptidase LytM OS=Staphylococcus aureus (strain NCTC 8325) GN=lytM PE=1 SV=3
sp|O34090|HEM3_STAA8 Porphobilinogen deaminase OS=Staphylococcus aureus (strain NCTC 8325) GN=hemC PE=3 SV=1	sp|O34090|HEM3_STAA8	Porphobilinogen deaminase OS=Staphylococcus aureus (strain NCTC 8325) GN=hemC PE=3 SV=1
sp|O52582|CDR_STAA8 Coenzyme A disulfide reductase OS=Staphylococcus aureus (strain NCTC 8325) GN=cdr PE=1 SV=3	sp|O52582|CDR_STAA8	Coenzyme A disulfide reductase OS=Staphylococcus aureus (strain NCTC 8325) GN=cdr PE=1 SV=3
sp|P02976|SPA_STAA8 Immunoglobulin G-binding protein A OS=Staphylococcus aureus (strain NCTC 8325) GN=spa PE=1 SV=3	sp|P02976|SPA_STAA8	Immunoglobulin G-binding protein A OS=Staphylococcus aureus (strain NCTC 8325) GN=spa PE=1 SV=3
sp|P0A084|MSRA1_STAA8 Peptide methionine sulfoxide reductase MsrA 1 OS=Staphylococcus aureus (strain NCTC 8325) GN=msrA1 PE=3 SV=1	sp|P0A084|MSRA1_STAA8	Peptide methionine sulfoxide reductase MsrA 1 OS=Staphylococcus aureus (strain NCTC 8325) GN=msrA1 PE=3 SV=1
sp|P0A086|MSRA2_STAA8 Peptide methionine sulfoxide reductase MsrA 2 OS=Staphylococcus aureus (strain NCTC 8325) GN=msrA2 PE=1 SV=1	sp|P0A086|MSRA2_STAA8	Peptide methionine sulfoxide reductase MsrA 2 OS=Staphylococcus aureus (strain NCTC 8325) GN=msrA2 PE=1 SV=1
sp|P0A088|MSRB_STAA8 Peptide methionine sulfoxide reductase MsrB OS=Staphylococcus aureus (strain NCTC 8325) GN=msrB PE=1 SV=1	sp|P0A088|MSRB_STAA8	Peptide methionine sulfoxide reductase MsrB OS=Staphylococcus aureus (strain NCTC 8325) GN=msrB PE=1 SV=1
sp|P0A0B7|AHPC_STAA8 Alkyl hydroperoxide reductase C OS=Staphylococcus aureus (strain NCTC 8325) GN=ahpC PE=1 SV=1	sp|P0A0B7|AHPC_STAA8	Alkyl hydroperoxide reductase C OS=Staphylococcus aureus (strain NCTC 8325) GN=ahpC PE=1 SV=1
sp|P0A0F4|RL11_STAA8 50S ribosomal protein L11 OS=Staphylococcus aureus (strain NCTC 8325) GN=rplK PE=3 SV=2	sp|P0A0F4|RL11_STAA8	50S ribosomal protein L11 OS=Staphylococcus aureus (strain NCTC 8325) GN=rplK PE=3 SV=2
sp|P0A0F8|RL15_STAA8 50S ribosomal protein L15 OS=Staphylococcus aureus (strain NCTC 8325) GN=rplO PE=1 SV=1	sp|P0A0F8|RL15_STAA8	50S ribosomal protein L15 OS=Staphylococcus aureus (strain NCTC 8325) GN=rplO PE=1 SV=1
sp|P0A0G2|RL30_STAA8 50S ribosomal protein L30 OS=Staphylococcus aureus (strain NCTC 8325) GN=rpmD PE=1 SV=1	sp|P0A0G2|RL30_STAA8	50S ribosomal protein L30 OS=Staphylococcus aureus (strain NCTC 8325) GN=rpmD PE=1 SV=1
sp|P0A0H0|RS12_STAA8 30S ribosomal protein S12 OS=Staphylococcus aureus (strain NCTC 8325) GN=rpsL PE=1 SV=1	sp|P0A0H0|RS12_STAA8	30S ribosomal protein S12 OS=Staphylococcus aureus (strain NCTC 8325) GN=rpsL PE=1 SV=1
sp|P0A0J0|SIGA_STAA8 RNA polymerase sigma factor SigA OS=Staphylococcus aureus (strain NCTC 8325) GN=sigA PE=1 SV=1	sp|P0A0J0|SIGA_STAA8	RNA polymerase sigma factor SigA OS=Staphylococcus aureus (strain NCTC 8325) GN=sigA PE=1 SV=1
sp|P0A0J3|SODM1_STAA8 Superoxide dismutase [Mn] 1 OS=Staphylococcus aureus (strain NCTC 8325) GN=sodA PE=1 SV=1	sp|P0A0J3|SODM1_STAA8	Superoxide dismutase [Mn] 1 OS=Staphylococcus aureus (strain NCTC 8325) GN=sodA PE=1 SV=1
sp|P0A0K3|Y2013_STAA8 Uncharacterized protein SAOUHSC_02013 OS=Staphylococcus aureus (strain NCTC 8325) GN=SAOUHSC_02013 PE=3 SV=1	sp|P0A0K3|Y2013_STAA8	Uncharacterized protein SAOUHSC_02013 OS=Staphylococcus aureus (strain NCTC 8325) GN=SAOUHSC_02013 PE=3 SV=1
sp|P0A0M9|ATSE_STAA8 Putative acetyltransferase SAOUHSC_00995 OS=Staphylococcus aureus (strain NCTC 8325) GN=SAOUHSC_00995 PE=3 SV=1	sp|P0A0M9|ATSE_STAA8	Putative acetyltransferase SAOUHSC_00995 OS=Staphylococcus aureus (strain NCTC 8325) GN=SAOUHSC_00995 PE=3 SV=1
sp|P0C0V7|GLMM_STAA8 Phosphoglucosamine mutase OS=Staphylococcus aureus (strain NCTC 8325) GN=glmM PE=1 SV=1	sp|P0C0V7|GLMM_STAA8	Phosphoglucosamine mutase OS=Staphylococcus aureus (strain NCTC 8325) GN=glmM PE=1 SV=1
sp|P0C7Y1|PSMA1_STAA8 Phenol-soluble modulin alpha 1 peptide OS=Staphylococcus aureus (strain NCTC 8325) GN=psmA1 PE=1 SV=1	sp|P0C7Y1|PSMA1_STAA8	Phenol-soluble modulin alpha 1 peptide OS=Staphylococcus aureus (strain NCTC 8325) GN=psmA1 PE=1 SV=1
sp|P0C818|PSMA4_STAA8 Phenol-soluble modulin alpha 4 peptide OS=Staphylococcus aureus (strain NCTC 8325) GN=psmA4 PE=3 SV=1	sp|P0C818|PSMA4_STAA8	Phenol-soluble modulin alpha 4 peptide OS=Staphylococcus aureus (strain NCTC 8325) GN=psmA4 PE=3 SV=1
sp|P14738|FNBA_STAA8 Fibronectin-binding protein A OS=Staphylococcus aureus (strain NCTC 8325) GN=fnbA PE=1 SV=1	sp|P14738|FNBA_STAA8	Fibronectin-binding protein A OS=Staphylococcus aureus (strain NCTC 8325) GN=fnbA PE=1 SV=1
sp|P47768|RPOB_STAA8 DNA-directed RNA polymerase subunit beta OS=Staphylococcus aureus (strain NCTC 8325) GN=rpoB PE=3 SV=2	sp|P47768|RPOB_STAA8	DNA-directed RNA polymerase subunit beta OS=Staphylococcus aureus (strain NCTC 8325) GN=rpoB PE=3 SV=2
sp|P48860|RL7_STAA8 50S ribosomal protein L7/L12 OS=Staphylococcus aureus (strain NCTC 8325) GN=rplL PE=3 SV=2	sp|P48860|RL7_STAA8	50S ribosomal protein L7/L12 OS=Staphylococcus aureus (strain NCTC 8325) GN=rplL PE=3 SV=2
sp|P48940|RS7_STAA8 30S ribosomal protein S7 OS=Staphylococcus aureus (strain NCTC 8325) GN=rpsG PE=1 SV=2	sp|P48940|RS7_STAA8	30S ribosomal protein S7 OS=Staphylococcus aureus (strain NCTC 8325) GN=rpsG PE=1 SV=2
sp|P52078|Y997_STAA8 Uncharacterized protein SAOUHSC_00997 OS=Staphylococcus aureus (strain NCTC 8325) GN=SAOUHSC_00997 PE=3 SV=2	sp|P52078|Y997_STAA8	Uncharacterized protein SAOUHSC_00997 OS=Staphylococcus aureus (strain NCTC 8325) GN=SAOUHSC_00997 PE=3 SV=2
sp|P60070|RSBV_STAA8 Anti-sigma-B factor antagonist OS=Staphylococcus aureus (strain NCTC 8325) GN=rsbV PE=3 SV=1	sp|P60070|RSBV_STAA8	Anti-sigma-B factor antagonist OS=Staphylococcus aureus (strain NCTC 8325) GN=rsbV PE=3 SV=1
sp|P60393|RSMH_STAA8 Ribosomal RNA small subunit methyltransferase H OS=Staphylococcus aureus (strain NCTC 8325) GN=rsmH PE=3 SV=1	sp|P60393|RSMH_STAA8	Ribosomal RNA small subunit methyltransferase H OS=Staphylococcus aureus (strain NCTC 8325) GN=rsmH PE=3 SV=1
sp|P60430|RL2_STAA8 50S ribosomal protein L2 OS=Staphylococcus aureus (strain NCTC 8325) GN=rplB PE=1 SV=1	sp|P60430|RL2_STAA8	50S ribosomal protein L2 OS=Staphylococcus aureus (strain NCTC 8325) GN=rplB PE=1 SV=1
sp|P95689|SYS_STAA8 Serine--tRNA ligase OS=Staphylococcus aureus (strain NCTC 8325) GN=serS PE=3 SV=1	sp|P95689|SYS_STAA8	Serine--tRNA ligase OS=Staphylococcus aureus (strain NCTC 8325) GN=serS PE=3 SV=1
sp|Q05615|AROA_STAA8 3-phosphoshikimate 1-carboxyvinyltransferase OS=Staphylococcus aureus (strain NCTC 8325) GN=aroA PE=3 SV=2	sp|Q05615|AROA_STAA8	3-phosphoshikimate 1-carboxyvinyltransferase OS=Staphylococcus aureus (strain NCTC 8325) GN=aroA PE=3 SV=2
sp|Q2FUQ2|MNME_STAA8 tRNA modification GTPase MnmE OS=Staphylococcus aureus (strain NCTC 8325) GN=mnmE PE=3 SV=1	sp|Q2FUQ2|MNME_STAA8	tRNA modification GTPase MnmE OS=Staphylococcus aureus (strain NCTC 8325) GN=mnmE PE=3 SV=1
sp|Q2FUQ3|MNMG_STAA8 tRNA uridine 5-carboxymethylaminomethyl modification enzyme MnmG OS=Staphylococcus aureus (strain NCTC 8325) GN=mnmG PE=3 SV=2	sp|Q2FUQ3|MNMG_STAA8	tRNA uridine 5-carboxymethylaminomethyl modification enzyme MnmG OS=Staphylococcus aureus (strain NCTC 8325) GN=mnmG PE=3 SV=2
sp|Q2FUQ4|RSMG_STAA8 Ribosomal RNA small subunit methyltransferase G OS=Staphylococcus aureus (strain NCTC 8325) GN=rsmG PE=3 SV=1	sp|Q2FUQ4|RSMG_STAA8	Ribosomal RNA small subunit methyltransferase G OS=Staphylococcus aureus (strain NCTC 8325) GN=rsmG PE=3 SV=1
sp|Q2FUS7|Y3024_STAA8 UPF0176 protein SAOUHSC_03024 OS=Staphylococcus aureus (strain NCTC 8325) GN=SAOUHSC_03024 PE=3 SV=1	sp|Q2FUS7|Y3024_STAA8	UPF0176 protein SAOUHSC_03024 OS=Staphylococcus aureus (strain NCTC 8325) GN=SAOUHSC_03024 PE=3 SV=1
sp|Q2FUS9|Y3022_STAA8 UPF0312 protein SAOUHSC_03022 OS=Staphylococcus aureus (strain NCTC 8325) GN=SAOUHSC_03022 PE=3 SV=1	sp|Q2FUS9|Y3022_STAA8	UPF0312 protein SAOUHSC_03022 OS=Staphylococcus aureus (strain NCTC 8325) GN=SAOUHSC_03022 PE=3 SV=1
sp|Q2FUT6|HISZ_STAA8 ATP phosphoribosyltransferase regulatory subunit OS=Staphylococcus aureus (strain NCTC 8325) GN=hisZ PE=3 SV=1	sp|Q2FUT6|HISZ_STAA8	ATP phosphoribosyltransferase regulatory subunit OS=Staphylococcus aureus (strain NCTC 8325) GN=hisZ PE=3 SV=1
sp|Q2FUW6|SECA2_STAA8 Protein translocase subunit SecA 2 OS=Staphylococcus aureus (strain NCTC 8325) GN=secA2 PE=3 SV=1	sp|Q2FUW6|SECA2_STAA8	Protein translocase subunit SecA 2 OS=Staphylococcus aureus (strain NCTC 8325) GN=secA2 PE=3 SV=1
sp|Q2FUX3|ISAB_STAA8 Immunodominant staphylococcal antigen B OS=Staphylococcus aureus (strain NCTC 8325) GN=isaB PE=2 SV=1	sp|Q2FUX3|ISAB_STAA8	Immunodominant staphylococcal antigen B OS=Staphylococcus aureus (strain NCTC 8325) GN=isaB PE=2 SV=1
sp|Q2FUX7|ARCA_STAA8 Arginine deiminase OS=Staphylococcus aureus (strain NCTC 8325) GN=arcA PE=3 SV=1	sp|Q2FUX7|ARCA_STAA8	Arginine deiminase OS=Staphylococcus aureus (strain NCTC 8325) GN=arcA PE=3 SV=1
sp|Q2FUY2|CLFB_STAA8 Clumping factor B OS=Staphylococcus aureus (strain NCTC 8325) GN=clfB PE=1 SV=1	sp|Q2FUY2|CLFB_STAA8	Clumping factor B OS=Staphylococcus aureus (strain NCTC 8325) GN=clfB PE=1 SV=1
sp|Q2FV11|BETA_STAA8 Oxygen-dependent choline dehydrogenase OS=Staphylococcus aureus (strain NCTC 8325) GN=betA PE=3 SV=1	sp|Q2FV11|BETA_STAA8	Oxygen-dependent choline dehydrogenase OS=Staphylococcus aureus (strain NCTC 8325) GN=betA PE=3 SV=1
sp|Q2FV17|ALF1_STAA8 Fructose-bisphosphate aldolase class 1 OS=Staphylococcus aureus (strain NCTC 8325) GN=fda PE=3 SV=1	sp|Q2FV17|ALF1_STAA8	Fructose-bisphosphate aldolase class 1 OS=Staphylococcus aureus (strain NCTC 8325) GN=fda PE=3 SV=1
sp|Q2FV21|PANB_STAA8 3-methyl-2-oxobutanoate hydroxymethyltransferase OS=Staphylococcus aureus (strain NCTC 8325) GN=panB PE=3 SV=2	sp|Q2FV21|PANB_STAA8	3-methyl-2-oxobutanoate hydroxymethyltransferase OS=Staphylococcus aureus (strain NCTC 8325) GN=panB PE=3 SV=2
sp|Q2FV22|PANC_STAA8 Pantothenate synthetase OS=Staphylococcus aureus (strain NCTC 8325) GN=panC PE=1 SV=1	sp|Q2FV22|PANC_STAA8	Pantothenate synthetase OS=Staphylococcus aureus (strain NCTC 8325) GN=panC PE=1 SV=1
sp|Q2FV23|PAND_STAA8 Aspartate 1-decarboxylase OS=Staphylococcus aureus (strain NCTC 8325) GN=panD PE=1 SV=2	sp|Q2FV23|PAND_STAA8	Aspartate 1-decarboxylase OS=Staphylococcus aureus (strain NCTC 8325) GN=panD PE=1 SV=2
sp|Q2FV39|Y2900_STAA8 Uncharacterized hydrolase SAOUHSC_02900 OS=Staphylococcus aureus (strain NCTC 8325) GN=SAOUHSC_02900 PE=3 SV=1	sp|Q2FV39|Y2900_STAA8	Uncharacterized hydrolase SAOUHSC_02900 OS=Staphylococcus aureus (strain NCTC 8325) GN=SAOUHSC_02900 PE=3 SV=1
sp|Q2FV52|ISAA_STAA8 Probable transglycosylase IsaA OS=Staphylococcus aureus (strain NCTC 8325) GN=isaA PE=1 SV=1	sp|Q2FV52|ISAA_STAA8	Probable transglycosylase IsaA OS=Staphylococcus aureus (strain NCTC 8325) GN=isaA PE=1 SV=1
sp|Q2FV54|OATA_STAA8 O-acetyltransferase OatA OS=Staphylococcus aureus (strain NCTC 8325) GN=oatA PE=3 SV=1	sp|Q2FV54|OATA_STAA8	O-acetyltransferase OatA OS=Staphylococcus aureus (strain NCTC 8325) GN=oatA PE=3 SV=1
sp|Q2FV55|SSAA_STAA8 Staphylococcal secretory antigen SsaA OS=Staphylococcus aureus (strain NCTC 8325) GN=ssaA PE=2 SV=1	sp|Q2FV55|SSAA_STAA8	Staphylococcal secretory antigen SsaA OS=Staphylococcus aureus (strain NCTC 8325) GN=ssaA PE=2 SV=1
sp|Q2FV60|CRTN_STAA8 Dehydrosqualene desaturase OS=Staphylococcus aureus (strain NCTC 8325) GN=crtN PE=3 SV=1	sp|Q2FV60|CRTN_STAA8	Dehydrosqualene desaturase OS=Staphylococcus aureus (strain NCTC 8325) GN=crtN PE=3 SV=1
sp|Q2FV63|COPZ_STAA8 Copper chaperone CopZ OS=Staphylococcus aureus (strain NCTC 8325) GN=copZ PE=1 SV=1	sp|Q2FV63|COPZ_STAA8	Copper chaperone CopZ OS=Staphylococcus aureus (strain NCTC 8325) GN=copZ PE=1 SV=1
sp|Q2FV67|ROCA_STAA8 1-pyrroline-5-carboxylate dehydrogenase OS=Staphylococcus aureus (strain NCTC 8325) GN=rocA PE=3 SV=1	sp|Q2FV67|ROCA_STAA8	1-pyrroline-5-carboxylate dehydrogenase OS=Staphylococcus aureus (strain NCTC 8325) GN=rocA PE=3 SV=1
sp|Q2FV74|CLPL_STAA8 ATP-dependent Clp protease ATP-binding subunit ClpL OS=Staphylococcus aureus (strain NCTC 8325) GN=clpL PE=2 SV=1	sp|Q2FV74|CLPL_STAA8	ATP-dependent Clp protease ATP-binding subunit ClpL OS=Staphylococcus aureus (strain NCTC 8325) GN=clpL PE=2 SV=1
sp|Q2FV87|PTU3C_STAA8 PTS system glucoside-specific EIICBA component OS=Staphylococcus aureus (strain NCTC 8325) GN=glcB PE=3 SV=1	sp|Q2FV87|PTU3C_STAA8	PTS system glucoside-specific EIICBA component OS=Staphylococcus aureus (strain NCTC 8325) GN=glcB PE=3 SV=1
sp|Q2FVA4|Y2829_STAA8 Putative NAD(P)H nitroreductase SAOUHSC_02829 OS=Staphylococcus aureus (strain NCTC 8325) GN=SAOUHSC_02829 PE=3 SV=1	sp|Q2FVA4|Y2829_STAA8	Putative NAD(P)H nitroreductase SAOUHSC_02829 OS=Staphylococcus aureus (strain NCTC 8325) GN=SAOUHSC_02829 PE=3 SV=1
sp|Q2FVB2|F16PC_STAA8 Fructose-1,6-bisphosphatase class 3 OS=Staphylococcus aureus (strain NCTC 8325) GN=fbp PE=3 SV=1	sp|Q2FVB2|F16PC_STAA8	Fructose-1,6-bisphosphatase class 3 OS=Staphylococcus aureus (strain NCTC 8325) GN=fbp PE=3 SV=1
sp|Q2FVC1|PGCA_STAA8 Phosphoglucomutase OS=Staphylococcus aureus (strain NCTC 8325) GN=pgcA PE=1 SV=2	sp|Q2FVC1|PGCA_STAA8	Phosphoglucomutase OS=Staphylococcus aureus (strain NCTC 8325) GN=pgcA PE=1 SV=2
sp|Q2FVC5|Y2788_STAA8 Uncharacterized lipoprotein SAOUHSC_02788 OS=Staphylococcus aureus (strain NCTC 8325) GN=SAOUHSC_02788 PE=3 SV=1;sp|Q2FVD0|Y2783_STAA8 Uncharacterized protein SAOUHSC_02783 OS=Staphylococcus aureus (strain NCTC 8325) GN=SAOUHSC_02783	sp|Q2FVC5|Y2788_STAA8	Uncharacterized lipoprotein SAOUHSC_02788 OS=Staphylococcus aureus (strain NCTC 8325) GN=SAOUHSC_02788 PE=3 SV=1;sp|Q2FVD0|Y2783_STAA8	Uncharacterized protein SAOUHSC_02783 OS=Staphylococcus aureus (strain NCTC 8325) GN=SAOUHSC_02783
sp|Q2FVD5|Y2778_STAA8 Uncharacterized oxidoreductase SAOUHSC_02778 OS=Staphylococcus aureus (strain NCTC 8325) GN=SAOUHSC_02778 PE=3 SV=1	sp|Q2FVD5|Y2778_STAA8	Uncharacterized oxidoreductase SAOUHSC_02778 OS=Staphylococcus aureus (strain NCTC 8325) GN=SAOUHSC_02778 PE=3 SV=1
sp|Q2FVJ6|BIOA_STAA8 Adenosylmethionine-8-amino-7-oxononanoate aminotransferase OS=Staphylococcus aureus (strain NCTC 8325) GN=bioA PE=3 SV=1	sp|Q2FVJ6|BIOA_STAA8	Adenosylmethionine-8-amino-7-oxononanoate aminotransferase OS=Staphylococcus aureus (strain NCTC 8325) GN=bioA PE=3 SV=1
sp|Q2FVJ7|BIOB_STAA8 Biotin synthase OS=Staphylococcus aureus (strain NCTC 8325) GN=bioB PE=3 SV=1	sp|Q2FVJ7|BIOB_STAA8	Biotin synthase OS=Staphylococcus aureus (strain NCTC 8325) GN=bioB PE=3 SV=1
sp|Q2FVK5|SBI_STAA8 Immunoglobulin-binding protein sbi OS=Staphylococcus aureus (strain NCTC 8325) GN=sbi PE=1 SV=1	sp|Q2FVK5|SBI_STAA8	Immunoglobulin-binding protein sbi OS=Staphylococcus aureus (strain NCTC 8325) GN=sbi PE=1 SV=1
sp|Q2FVK8|GPMA_STAA8 2,3-bisphosphoglycerate-dependent phosphoglycerate mutase OS=Staphylococcus aureus (strain NCTC 8325) GN=gpmA PE=3 SV=1	sp|Q2FVK8|GPMA_STAA8	2,3-bisphosphoglycerate-dependent phosphoglycerate mutase OS=Staphylococcus aureus (strain NCTC 8325) GN=gpmA PE=3 SV=1
sp|Q2FVN3|SARZ_STAA8 HTH-type transcriptional regulator SarZ OS=Staphylococcus aureus (strain NCTC 8325) GN=sarZ PE=1 SV=1	sp|Q2FVN3|SARZ_STAA8	HTH-type transcriptional regulator SarZ OS=Staphylococcus aureus (strain NCTC 8325) GN=sarZ PE=1 SV=1
sp|Q2FVP8|FENR_STAA8 Ferredoxin--NADP reductase OS=Staphylococcus aureus (strain NCTC 8325) GN=SAOUHSC_02654 PE=3 SV=1	sp|Q2FVP8|FENR_STAA8	Ferredoxin--NADP reductase OS=Staphylococcus aureus (strain NCTC 8325) GN=SAOUHSC_02654 PE=3 SV=1
sp|Q2FVQ2|Y2650_STAA8 Uncharacterized lipoprotein SAOUHSC_02650 OS=Staphylococcus aureus (strain NCTC 8325) GN=SAOUHSC_02650 PE=3 SV=1	sp|Q2FVQ2|Y2650_STAA8	Uncharacterized lipoprotein SAOUHSC_02650 OS=Staphylococcus aureus (strain NCTC 8325) GN=SAOUHSC_02650 PE=3 SV=1
sp|Q2FVR9|IDI2_STAA8 Isopentenyl-diphosphate delta-isomerase OS=Staphylococcus aureus (strain NCTC 8325) GN=fni PE=3 SV=1	sp|Q2FVR9|IDI2_STAA8	Isopentenyl-diphosphate delta-isomerase OS=Staphylococcus aureus (strain NCTC 8325) GN=fni PE=3 SV=1
sp|Q2FVT1|LYRA_STAA8 Lysostaphin resistance protein A OS=Staphylococcus aureus (strain NCTC 8325) GN=lyrA PE=1 SV=1	sp|Q2FVT1|LYRA_STAA8	Lysostaphin resistance protein A OS=Staphylococcus aureus (strain NCTC 8325) GN=lyrA PE=1 SV=1
sp|Q2FVT2|HUTG_STAA8 Formimidoylglutamase OS=Staphylococcus aureus (strain NCTC 8325) GN=hutG PE=3 SV=1	sp|Q2FVT2|HUTG_STAA8	Formimidoylglutamase OS=Staphylococcus aureus (strain NCTC 8325) GN=hutG PE=3 SV=1
sp|Q2FVV9|FDHL_STAA8 Putative formate dehydrogenase SAOUHSC_02582 OS=Staphylococcus aureus (strain NCTC 8325) GN=SAOUHSC_02582 PE=3 SV=1	sp|Q2FVV9|FDHL_STAA8	Putative formate dehydrogenase SAOUHSC_02582 OS=Staphylococcus aureus (strain NCTC 8325) GN=SAOUHSC_02582 PE=3 SV=1
sp|Q2FVW4|Y2577_STAA8 Putative 2-hydroxyacid dehydrogenase SAOUHSC_02577 OS=Staphylococcus aureus (strain NCTC 8325) GN=SAOUHSC_02577 PE=3 SV=1	sp|Q2FVW4|Y2577_STAA8	Putative 2-hydroxyacid dehydrogenase SAOUHSC_02577 OS=Staphylococcus aureus (strain NCTC 8325) GN=SAOUHSC_02577 PE=3 SV=1
sp|Q2FVX9|MOAC_STAA8 Cyclic pyranopterin monophosphate synthase OS=Staphylococcus aureus (strain NCTC 8325) GN=moaC PE=1 SV=1	sp|Q2FVX9|MOAC_STAA8	Cyclic pyranopterin monophosphate synthase OS=Staphylococcus aureus (strain NCTC 8325) GN=moaC PE=1 SV=1
sp|Q2FVZ4|FEMX_STAA8 Lipid II:glycine glycyltransferase OS=Staphylococcus aureus (strain NCTC 8325) GN=femX PE=1 SV=1	sp|Q2FVZ4|FEMX_STAA8	Lipid II:glycine glycyltransferase OS=Staphylococcus aureus (strain NCTC 8325) GN=femX PE=1 SV=1
sp|Q2FW03|TOP3_STAA8 DNA topoisomerase 3 OS=Staphylococcus aureus (strain NCTC 8325) GN=topB PE=3 SV=1	sp|Q2FW03|TOP3_STAA8	DNA topoisomerase 3 OS=Staphylococcus aureus (strain NCTC 8325) GN=topB PE=3 SV=1
sp|Q2FW06|RL3_STAA8 50S ribosomal protein L3 OS=Staphylococcus aureus (strain NCTC 8325) GN=rplC PE=1 SV=1	sp|Q2FW06|RL3_STAA8	50S ribosomal protein L3 OS=Staphylococcus aureus (strain NCTC 8325) GN=rplC PE=1 SV=1
sp|Q2FW07|RL4_STAA8 50S ribosomal protein L4 OS=Staphylococcus aureus (strain NCTC 8325) GN=rplD PE=1 SV=1	sp|Q2FW07|RL4_STAA8	50S ribosomal protein L4 OS=Staphylococcus aureus (strain NCTC 8325) GN=rplD PE=1 SV=1
sp|Q2FW08|RL23_STAA8 50S ribosomal protein L23 OS=Staphylococcus aureus (strain NCTC 8325) GN=rplW PE=1 SV=1	sp|Q2FW08|RL23_STAA8	50S ribosomal protein L23 OS=Staphylococcus aureus (strain NCTC 8325) GN=rplW PE=1 SV=1
sp|Q2FW10|RS19_STAA8 30S ribosomal protein S19 OS=Staphylococcus aureus (strain NCTC 8325) GN=rpsS PE=1 SV=1	sp|Q2FW10|RS19_STAA8	30S ribosomal protein S19 OS=Staphylococcus aureus (strain NCTC 8325) GN=rpsS PE=1 SV=1
sp|Q2FW11|RL22_STAA8 50S ribosomal protein L22 OS=Staphylococcus aureus (strain NCTC 8325) GN=rplV PE=1 SV=1	sp|Q2FW11|RL22_STAA8	50S ribosomal protein L22 OS=Staphylococcus aureus (strain NCTC 8325) GN=rplV PE=1 SV=1
sp|Q2FW12|RS3_STAA8 30S ribosomal protein S3 OS=Staphylococcus aureus (strain NCTC 8325) GN=rpsC PE=1 SV=1	sp|Q2FW12|RS3_STAA8	30S ribosomal protein S3 OS=Staphylococcus aureus (strain NCTC 8325) GN=rpsC PE=1 SV=1
sp|Q2FW13|RL16_STAA8 50S ribosomal protein L16 OS=Staphylococcus aureus (strain NCTC 8325) GN=rplP PE=1 SV=1	sp|Q2FW13|RL16_STAA8	50S ribosomal protein L16 OS=Staphylococcus aureus (strain NCTC 8325) GN=rplP PE=1 SV=1
sp|Q2FW14|RL29_STAA8 50S ribosomal protein L29 OS=Staphylococcus aureus (strain NCTC 8325) GN=rpmC PE=1 SV=1	sp|Q2FW14|RL29_STAA8	50S ribosomal protein L29 OS=Staphylococcus aureus (strain NCTC 8325) GN=rpmC PE=1 SV=1
sp|Q2FW15|RS17_STAA8 30S ribosomal protein S17 OS=Staphylococcus aureus (strain NCTC 8325) GN=rpsQ PE=1 SV=1	sp|Q2FW15|RS17_STAA8	30S ribosomal protein S17 OS=Staphylococcus aureus (strain NCTC 8325) GN=rpsQ PE=1 SV=1
sp|Q2FW16|RL14_STAA8 50S ribosomal protein L14 OS=Staphylococcus aureus (strain NCTC 8325) GN=rplN PE=1 SV=1	sp|Q2FW16|RL14_STAA8	50S ribosomal protein L14 OS=Staphylococcus aureus (strain NCTC 8325) GN=rplN PE=1 SV=1
sp|Q2FW17|RL24_STAA8 50S ribosomal protein L24 OS=Staphylococcus aureus (strain NCTC 8325) GN=rplX PE=1 SV=1	sp|Q2FW17|RL24_STAA8	50S ribosomal protein L24 OS=Staphylococcus aureus (strain NCTC 8325) GN=rplX PE=1 SV=1
sp|Q2FW18|RL5_STAA8 50S ribosomal protein L5 OS=Staphylococcus aureus (strain NCTC 8325) GN=rplE PE=1 SV=1	sp|Q2FW18|RL5_STAA8	50S ribosomal protein L5 OS=Staphylococcus aureus (strain NCTC 8325) GN=rplE PE=1 SV=1
sp|Q2FW20|RS8_STAA8 30S ribosomal protein S8 OS=Staphylococcus aureus (strain NCTC 8325) GN=rpsH PE=1 SV=1	sp|Q2FW20|RS8_STAA8	30S ribosomal protein S8 OS=Staphylococcus aureus (strain NCTC 8325) GN=rpsH PE=1 SV=1
sp|Q2FW21|RL6_STAA8 50S ribosomal protein L6 OS=Staphylococcus aureus (strain NCTC 8325) GN=rplF PE=1 SV=1	sp|Q2FW21|RL6_STAA8	50S ribosomal protein L6 OS=Staphylococcus aureus (strain NCTC 8325) GN=rplF PE=1 SV=1
sp|Q2FW22|RL18_STAA8 50S ribosomal protein L18 OS=Staphylococcus aureus (strain NCTC 8325) GN=rplR PE=1 SV=1	sp|Q2FW22|RL18_STAA8	50S ribosomal protein L18 OS=Staphylococcus aureus (strain NCTC 8325) GN=rplR PE=1 SV=1
sp|Q2FW23|RS5_STAA8 30S ribosomal protein S5 OS=Staphylococcus aureus (strain NCTC 8325) GN=rpsE PE=1 SV=1	sp|Q2FW23|RS5_STAA8	30S ribosomal protein S5 OS=Staphylococcus aureus (strain NCTC 8325) GN=rpsE PE=1 SV=1
sp|Q2FW28|IF1_STAA8 Translation initiation factor IF-1 OS=Staphylococcus aureus (strain NCTC 8325) GN=infA PE=1 SV=1	sp|Q2FW28|IF1_STAA8	Translation initiation factor IF-1 OS=Staphylococcus aureus (strain NCTC 8325) GN=infA PE=1 SV=1
sp|Q2FW30|RS13_STAA8 30S ribosomal protein S13 OS=Staphylococcus aureus (strain NCTC 8325) GN=rpsM PE=1 SV=1	sp|Q2FW30|RS13_STAA8	30S ribosomal protein S13 OS=Staphylococcus aureus (strain NCTC 8325) GN=rpsM PE=1 SV=1
sp|Q2FW31|RS11_STAA8 30S ribosomal protein S11 OS=Staphylococcus aureus (strain NCTC 8325) GN=rpsK PE=1 SV=1	sp|Q2FW31|RS11_STAA8	30S ribosomal protein S11 OS=Staphylococcus aureus (strain NCTC 8325) GN=rpsK PE=1 SV=1
sp|Q2FW32|RPOA_STAA8 DNA-directed RNA polymerase subunit alpha OS=Staphylococcus aureus (strain NCTC 8325) GN=rpoA PE=3 SV=1	sp|Q2FW32|RPOA_STAA8	DNA-directed RNA polymerase subunit alpha OS=Staphylococcus aureus (strain NCTC 8325) GN=rpoA PE=3 SV=1
sp|Q2FW33|RL17_STAA8 50S ribosomal protein L17 OS=Staphylococcus aureus (strain NCTC 8325) GN=rplQ PE=1 SV=1	sp|Q2FW33|RL17_STAA8	50S ribosomal protein L17 OS=Staphylococcus aureus (strain NCTC 8325) GN=rplQ PE=1 SV=1
sp|Q2FW35|ECFA2_STAA8 Energy-coupling factor transporter ATP-binding protein EcfA2 OS=Staphylococcus aureus (strain NCTC 8325) GN=ecfA2 PE=3 SV=1	sp|Q2FW35|ECFA2_STAA8	Energy-coupling factor transporter ATP-binding protein EcfA2 OS=Staphylococcus aureus (strain NCTC 8325) GN=ecfA2 PE=3 SV=1
sp|Q2FW37|TRUA_STAA8 tRNA pseudouridine synthase A OS=Staphylococcus aureus (strain NCTC 8325) GN=truA PE=3 SV=1	sp|Q2FW37|TRUA_STAA8	tRNA pseudouridine synthase A OS=Staphylococcus aureus (strain NCTC 8325) GN=truA PE=3 SV=1
sp|Q2FW38|RL13_STAA8 50S ribosomal protein L13 OS=Staphylococcus aureus (strain NCTC 8325) GN=rplM PE=1 SV=1	sp|Q2FW38|RL13_STAA8	50S ribosomal protein L13 OS=Staphylococcus aureus (strain NCTC 8325) GN=rplM PE=1 SV=1
sp|Q2FW39|RS9_STAA8 30S ribosomal protein S9 OS=Staphylococcus aureus (strain NCTC 8325) GN=rpsI PE=1 SV=1	sp|Q2FW39|RS9_STAA8	30S ribosomal protein S9 OS=Staphylococcus aureus (strain NCTC 8325) GN=rpsI PE=1 SV=1
sp|Q2FW52|Y2465_STAA8 Uncharacterized hydrolase SAOUHSC_02465 OS=Staphylococcus aureus (strain NCTC 8325) GN=SAOUHSC_02465 PE=3 SV=1	sp|Q2FW52|Y2465_STAA8	Uncharacterized hydrolase SAOUHSC_02465 OS=Staphylococcus aureus (strain NCTC 8325) GN=SAOUHSC_02465 PE=3 SV=1
sp|Q2FW66|ASP23_STAA8 Alkaline shock protein 23 OS=Staphylococcus aureus (strain NCTC 8325) GN=asp23 PE=3 SV=1	sp|Q2FW66|ASP23_STAA8	Alkaline shock protein 23 OS=Staphylococcus aureus (strain NCTC 8325) GN=asp23 PE=3 SV=1
sp|Q2FW79|Y2425_STAA8 UPF0457 protein SAOUHSC_02425 OS=Staphylococcus aureus (strain NCTC 8325) GN=SAOUHSC_02425 PE=3 SV=1	sp|Q2FW79|Y2425_STAA8	UPF0457 protein SAOUHSC_02425 OS=Staphylococcus aureus (strain NCTC 8325) GN=SAOUHSC_02425 PE=3 SV=1
sp|Q2FW81|URTF_STAA8 Probable uridylyltransferase SAOUHSC_02423 OS=Staphylococcus aureus (strain NCTC 8325) GN=SAOUHSC_02423 PE=3 SV=1	sp|Q2FW81|URTF_STAA8	Probable uridylyltransferase SAOUHSC_02423 OS=Staphylococcus aureus (strain NCTC 8325) GN=SAOUHSC_02423 PE=3 SV=1
sp|Q2FW96|MTLD_STAA8 Mannitol-1-phosphate 5-dehydrogenase OS=Staphylococcus aureus (strain NCTC 8325) GN=mtlD PE=3 SV=1	sp|Q2FW96|MTLD_STAA8	Mannitol-1-phosphate 5-dehydrogenase OS=Staphylococcus aureus (strain NCTC 8325) GN=mtlD PE=3 SV=1
sp|Q2FWC1|PDP_STAA8 Pyrimidine-nucleoside phosphorylase OS=Staphylococcus aureus (strain NCTC 8325) GN=pdp PE=3 SV=1	sp|Q2FWC1|PDP_STAA8	Pyrimidine-nucleoside phosphorylase OS=Staphylococcus aureus (strain NCTC 8325) GN=pdp PE=3 SV=1
sp|Q2FWC3|LUXS_STAA8 S-ribosylhomocysteine lyase OS=Staphylococcus aureus (strain NCTC 8325) GN=luxS PE=3 SV=1	sp|Q2FWC3|LUXS_STAA8	S-ribosylhomocysteine lyase OS=Staphylococcus aureus (strain NCTC 8325) GN=luxS PE=3 SV=1
sp|Q2FWD0|RPOE_STAA8 Probable DNA-directed RNA polymerase subunit delta OS=Staphylococcus aureus (strain NCTC 8325) GN=rpoE PE=3 SV=1	sp|Q2FWD0|RPOE_STAA8	Probable DNA-directed RNA polymerase subunit delta OS=Staphylococcus aureus (strain NCTC 8325) GN=rpoE PE=3 SV=1
sp|Q2FWD1|PYRG_STAA8 CTP synthase OS=Staphylococcus aureus (strain NCTC 8325) GN=pyrG PE=3 SV=1	sp|Q2FWD1|PYRG_STAA8	CTP synthase OS=Staphylococcus aureus (strain NCTC 8325) GN=pyrG PE=3 SV=1
sp|Q2FWD6|ALD1_STAA8 Putative aldehyde dehydrogenase SAOUHSC_02363 OS=Staphylococcus aureus (strain NCTC 8325) GN=SAOUHSC_02363 PE=3 SV=1	sp|Q2FWD6|ALD1_STAA8	Putative aldehyde dehydrogenase SAOUHSC_02363 OS=Staphylococcus aureus (strain NCTC 8325) GN=SAOUHSC_02363 PE=3 SV=1
sp|Q2FWD8|RL31B_STAA8 50S ribosomal protein L31 type B OS=Staphylococcus aureus (strain NCTC 8325) GN=rpmE2 PE=1 SV=1	sp|Q2FWD8|RL31B_STAA8	50S ribosomal protein L31 type B OS=Staphylococcus aureus (strain NCTC 8325) GN=rpmE2 PE=1 SV=1
sp|Q2FWE0|RF1_STAA8 Peptide chain release factor 1 OS=Staphylococcus aureus (strain NCTC 8325) GN=prfA PE=3 SV=1	sp|Q2FWE0|RF1_STAA8	Peptide chain release factor 1 OS=Staphylococcus aureus (strain NCTC 8325) GN=prfA PE=3 SV=1
sp|Q2FWE4|Y2355_STAA8 UPF0340 protein SAOUHSC_02355 OS=Staphylococcus aureus (strain NCTC 8325) GN=SAOUHSC_02355 PE=3 SV=1	sp|Q2FWE4|Y2355_STAA8	UPF0340 protein SAOUHSC_02355 OS=Staphylococcus aureus (strain NCTC 8325) GN=SAOUHSC_02355 PE=3 SV=1
sp|Q2FWE5|GLYA_STAA8 Serine hydroxymethyltransferase OS=Staphylococcus aureus (strain NCTC 8325) GN=glyA PE=3 SV=1	sp|Q2FWE5|GLYA_STAA8	Serine hydroxymethyltransferase OS=Staphylococcus aureus (strain NCTC 8325) GN=glyA PE=3 SV=1
sp|Q2FWE6|UPP_STAA8 Uracil phosphoribosyltransferase OS=Staphylococcus aureus (strain NCTC 8325) GN=upp PE=3 SV=1	sp|Q2FWE6|UPP_STAA8	Uracil phosphoribosyltransferase OS=Staphylococcus aureus (strain NCTC 8325) GN=upp PE=3 SV=1
sp|Q2FWE7|ATPD_STAA8 ATP synthase subunit delta OS=Staphylococcus aureus (strain NCTC 8325) GN=atpH PE=3 SV=1	sp|Q2FWE7|ATPD_STAA8	ATP synthase subunit delta OS=Staphylococcus aureus (strain NCTC 8325) GN=atpH PE=3 SV=1
sp|Q2FWE8|ATPA_STAA8 ATP synthase subunit alpha OS=Staphylococcus aureus (strain NCTC 8325) GN=atpA PE=3 SV=1	sp|Q2FWE8|ATPA_STAA8	ATP synthase subunit alpha OS=Staphylococcus aureus (strain NCTC 8325) GN=atpA PE=3 SV=1
sp|Q2FWF0|ATPB_STAA8 ATP synthase subunit beta OS=Staphylococcus aureus (strain NCTC 8325) GN=atpD PE=3 SV=1	sp|Q2FWF0|ATPB_STAA8	ATP synthase subunit beta OS=Staphylococcus aureus (strain NCTC 8325) GN=atpD PE=3 SV=1
sp|Q2FWF1|ATPE_STAA8 ATP synthase epsilon chain OS=Staphylococcus aureus (strain NCTC 8325) GN=atpC PE=3 SV=1	sp|Q2FWF1|ATPE_STAA8	ATP synthase epsilon chain OS=Staphylococcus aureus (strain NCTC 8325) GN=atpC PE=3 SV=1
sp|Q2FWF5|FABZ_STAA8 3-hydroxyacyl-[acyl-carrier-protein] dehydratase FabZ OS=Staphylococcus aureus (strain NCTC 8325) GN=fabZ PE=3 SV=1	sp|Q2FWF5|FABZ_STAA8	3-hydroxyacyl-[acyl-carrier-protein] dehydratase FabZ OS=Staphylococcus aureus (strain NCTC 8325) GN=fabZ PE=3 SV=1
sp|Q2FWF8|SCED_STAA8 Probable transglycosylase SceD OS=Staphylococcus aureus (strain NCTC 8325) GN=sceD PE=1 SV=1	sp|Q2FWF8|SCED_STAA8	Probable transglycosylase SceD OS=Staphylococcus aureus (strain NCTC 8325) GN=sceD PE=1 SV=1
sp|Q2FWG0|TENA_STAA8 Aminopyrimidine aminohydrolase OS=Staphylococcus aureus (strain NCTC 8325) GN=tenA PE=3 SV=1	sp|Q2FWG0|TENA_STAA8	Aminopyrimidine aminohydrolase OS=Staphylococcus aureus (strain NCTC 8325) GN=tenA PE=3 SV=1
sp|Q2FWG2|THIM_STAA8 Hydroxyethylthiazole kinase OS=Staphylococcus aureus (strain NCTC 8325) GN=thiM PE=3 SV=1	sp|Q2FWG2|THIM_STAA8	Hydroxyethylthiazole kinase OS=Staphylococcus aureus (strain NCTC 8325) GN=thiM PE=3 SV=1
sp|Q2FWG4|YIDC_STAA8 Membrane protein insertase YidC OS=Staphylococcus aureus (strain NCTC 8325) GN=yidC PE=3 SV=1	sp|Q2FWG4|YIDC_STAA8	Membrane protein insertase YidC OS=Staphylococcus aureus (strain NCTC 8325) GN=yidC PE=3 SV=1
sp|Q2FWH3|DDL_STAA8 D-alanine--D-alanine ligase OS=Staphylococcus aureus (strain NCTC 8325) GN=ddl PE=3 SV=1	sp|Q2FWH3|DDL_STAA8	D-alanine--D-alanine ligase OS=Staphylococcus aureus (strain NCTC 8325) GN=ddl PE=3 SV=1
sp|Q2FWH5|CSHA_STAA8 DEAD-box ATP-dependent RNA helicase CshA OS=Staphylococcus aureus (strain NCTC 8325) GN=cshA PE=1 SV=1	sp|Q2FWH5|CSHA_STAA8	DEAD-box ATP-dependent RNA helicase CshA OS=Staphylococcus aureus (strain NCTC 8325) GN=cshA PE=1 SV=1
sp|Q2FWH9|KDPA_STAA8 Potassium-transporting ATPase potassium-binding subunit OS=Staphylococcus aureus (strain NCTC 8325) GN=kdpA PE=3 SV=1	sp|Q2FWH9|KDPA_STAA8	Potassium-transporting ATPase potassium-binding subunit OS=Staphylococcus aureus (strain NCTC 8325) GN=kdpA PE=3 SV=1
sp|Q2FWI1|KDPC_STAA8 Potassium-transporting ATPase KdpC subunit OS=Staphylococcus aureus (strain NCTC 8325) GN=kdpC PE=3 SV=1	sp|Q2FWI1|KDPC_STAA8	Potassium-transporting ATPase KdpC subunit OS=Staphylococcus aureus (strain NCTC 8325) GN=kdpC PE=3 SV=1
sp|Q2FWI8|MAZF_STAA8 Endoribonuclease MazF OS=Staphylococcus aureus (strain NCTC 8325) GN=mazF PE=1 SV=1	sp|Q2FWI8|MAZF_STAA8	Endoribonuclease MazF OS=Staphylococcus aureus (strain NCTC 8325) GN=mazF PE=1 SV=1
sp|Q2FWJ3|RSBW_STAA8 Serine-protein kinase RsbW OS=Staphylococcus aureus (strain NCTC 8325) GN=rsbW PE=3 SV=2	sp|Q2FWJ3|RSBW_STAA8	Serine-protein kinase RsbW OS=Staphylococcus aureus (strain NCTC 8325) GN=rsbW PE=3 SV=2
sp|Q2FWK7|ILVD_STAA8 Dihydroxy-acid dehydratase OS=Staphylococcus aureus (strain NCTC 8325) GN=ilvD PE=3 SV=1	sp|Q2FWK7|ILVD_STAA8	Dihydroxy-acid dehydratase OS=Staphylococcus aureus (strain NCTC 8325) GN=ilvD PE=3 SV=1
sp|Q2FWL2|TSAD_STAA8 tRNA N6-adenosine threonylcarbamoyltransferase OS=Staphylococcus aureus (strain NCTC 8325) GN=tsaD PE=1 SV=1	sp|Q2FWL2|TSAD_STAA8	tRNA N6-adenosine threonylcarbamoyltransferase OS=Staphylococcus aureus (strain NCTC 8325) GN=tsaD PE=1 SV=1
sp|Q2FWL6|REX_STAA8 Redox-sensing transcriptional repressor Rex OS=Staphylococcus aureus (strain NCTC 8325) GN=rex PE=3 SV=1	sp|Q2FWL6|REX_STAA8	Redox-sensing transcriptional repressor Rex OS=Staphylococcus aureus (strain NCTC 8325) GN=rex PE=3 SV=1
sp|Q2FWM8|HLD_STAA8 Delta-hemolysin OS=Staphylococcus aureus (strain NCTC 8325) GN=hld PE=3 SV=3	sp|Q2FWM8|HLD_STAA8	Delta-hemolysin OS=Staphylococcus aureus (strain NCTC 8325) GN=hld PE=3 SV=3
sp|Q2FWN3|CH10_STAA8 10 kDa chaperonin OS=Staphylococcus aureus (strain NCTC 8325) GN=groS PE=3 SV=1	sp|Q2FWN3|CH10_STAA8	10 kDa chaperonin OS=Staphylococcus aureus (strain NCTC 8325) GN=groS PE=3 SV=1
sp|Q2FWN4|CH60_STAA8 60 kDa chaperonin OS=Staphylococcus aureus (strain NCTC 8325) GN=groL PE=3 SV=1	sp|Q2FWN4|CH60_STAA8	60 kDa chaperonin OS=Staphylococcus aureus (strain NCTC 8325) GN=groL PE=3 SV=1
sp|Q2FWP0|LUKL1_STAA8 Uncharacterized leukocidin-like protein 1 OS=Staphylococcus aureus (strain NCTC 8325) GN=SAOUHSC_02241 PE=1 SV=1	sp|Q2FWP0|LUKL1_STAA8	Uncharacterized leukocidin-like protein 1 OS=Staphylococcus aureus (strain NCTC 8325) GN=SAOUHSC_02241 PE=1 SV=1
sp|Q2FWP1|PHLC_STAA8 Phospholipase C OS=Staphylococcus aureus (strain NCTC 8325) GN=hlb PE=1 SV=2	sp|Q2FWP1|PHLC_STAA8	Phospholipase C OS=Staphylococcus aureus (strain NCTC 8325) GN=hlb PE=1 SV=2
sp|Q2FWX8|Y2143_STAA8 Uncharacterized protein SAOUHSC_02143 OS=Staphylococcus aureus (strain NCTC 8325) GN=SAOUHSC_02143 PE=3 SV=1	sp|Q2FWX8|Y2143_STAA8	Uncharacterized protein SAOUHSC_02143 OS=Staphylococcus aureus (strain NCTC 8325) GN=SAOUHSC_02143 PE=3 SV=1
sp|Q2FWY1|PPAC_STAA8 Probable manganese-dependent inorganic pyrophosphatase OS=Staphylococcus aureus (strain NCTC 8325) GN=ppaC PE=3 SV=1	sp|Q2FWY1|PPAC_STAA8	Probable manganese-dependent inorganic pyrophosphatase OS=Staphylococcus aureus (strain NCTC 8325) GN=ppaC PE=3 SV=1
sp|Q2FWY8|GATC_STAA8 Aspartyl/glutamyl-tRNA(Asn/Gln) amidotransferase subunit C OS=Staphylococcus aureus (strain NCTC 8325) GN=gatC PE=3 SV=1	sp|Q2FWY8|GATC_STAA8	Aspartyl/glutamyl-tRNA(Asn/Gln) amidotransferase subunit C OS=Staphylococcus aureus (strain NCTC 8325) GN=gatC PE=3 SV=1
sp|Q2FWY9|GATA_STAA8 Glutamyl-tRNA(Gln) amidotransferase subunit A OS=Staphylococcus aureus (strain NCTC 8325) GN=gatA PE=3 SV=1	sp|Q2FWY9|GATA_STAA8	Glutamyl-tRNA(Gln) amidotransferase subunit A OS=Staphylococcus aureus (strain NCTC 8325) GN=gatA PE=3 SV=1
sp|Q2FWZ0|GATB_STAA8 Aspartyl/glutamyl-tRNA(Asn/Gln) amidotransferase subunit B OS=Staphylococcus aureus (strain NCTC 8325) GN=gatB PE=3 SV=1	sp|Q2FWZ0|GATB_STAA8	Aspartyl/glutamyl-tRNA(Asn/Gln) amidotransferase subunit B OS=Staphylococcus aureus (strain NCTC 8325) GN=gatB PE=3 SV=1
sp|Q2FWZ2|DAGK_STAA8 Diacylglycerol kinase OS=Staphylococcus aureus (strain NCTC 8325) GN=dagK PE=3 SV=1	sp|Q2FWZ2|DAGK_STAA8	Diacylglycerol kinase OS=Staphylococcus aureus (strain NCTC 8325) GN=dagK PE=3 SV=1
sp|Q2FWZ8|FTN_STAA8 Bacterial non-heme ferritin OS=Staphylococcus aureus (strain NCTC 8325) GN=ftnA PE=1 SV=1	sp|Q2FWZ8|FTN_STAA8	Bacterial non-heme ferritin OS=Staphylococcus aureus (strain NCTC 8325) GN=ftnA PE=1 SV=1
sp|Q2FX12|PTPA_STAA8 Low molecular weight protein-tyrosine-phosphatase PtpA OS=Staphylococcus aureus (strain NCTC 8325) GN=ptpA PE=3 SV=1	sp|Q2FX12|PTPA_STAA8	Low molecular weight protein-tyrosine-phosphatase PtpA OS=Staphylococcus aureus (strain NCTC 8325) GN=ptpA PE=3 SV=1
sp|Q2FX13|Y2093_STAA8 UPF0435 protein SAOUHSC_02093 OS=Staphylococcus aureus (strain NCTC 8325) GN=SAOUHSC_02093 PE=3 SV=2	sp|Q2FX13|Y2093_STAA8	UPF0435 protein SAOUHSC_02093 OS=Staphylococcus aureus (strain NCTC 8325) GN=SAOUHSC_02093 PE=3 SV=2
sp|Q2FX99|Y1978_STAA8 UPF0754 membrane protein SAOUHSC_01978 OS=Staphylococcus aureus (strain NCTC 8325) GN=SAOUHSC_01978 PE=3 SV=1	sp|Q2FX99|Y1978_STAA8	UPF0754 membrane protein SAOUHSC_01978 OS=Staphylococcus aureus (strain NCTC 8325) GN=SAOUHSC_01978 PE=3 SV=1
sp|Q2FXA0|Y1977_STAA8 UPF0342 protein SAOUHSC_01977 OS=Staphylococcus aureus (strain NCTC 8325) GN=SAOUHSC_01977 PE=3 SV=1	sp|Q2FXA0|Y1977_STAA8	UPF0342 protein SAOUHSC_01977 OS=Staphylococcus aureus (strain NCTC 8325) GN=SAOUHSC_01977 PE=3 SV=1
sp|Q2FXA3|DCUP_STAA8 Uroporphyrinogen decarboxylase OS=Staphylococcus aureus (strain NCTC 8325) GN=hemE PE=3 SV=1	sp|Q2FXA3|DCUP_STAA8	Uroporphyrinogen decarboxylase OS=Staphylococcus aureus (strain NCTC 8325) GN=hemE PE=3 SV=1
sp|Q2FXG2|RISB_STAA8 6,7-dimethyl-8-ribityllumazine synthase OS=Staphylococcus aureus (strain NCTC 8325) GN=ribH PE=3 SV=1	sp|Q2FXG2|RISB_STAA8	6,7-dimethyl-8-ribityllumazine synthase OS=Staphylococcus aureus (strain NCTC 8325) GN=ribH PE=3 SV=1
sp|Q2FXH2|SYL_STAA8 Leucine--tRNA ligase OS=Staphylococcus aureus (strain NCTC 8325) GN=leuS PE=3 SV=1	sp|Q2FXH2|SYL_STAA8	Leucine--tRNA ligase OS=Staphylococcus aureus (strain NCTC 8325) GN=leuS PE=3 SV=1
sp|Q2FXH9|PEPVL_STAA8 Putative dipeptidase SAOUHSC_01868 OS=Staphylococcus aureus (strain NCTC 8325) GN=SAOUHSC_01868 PE=3 SV=1	sp|Q2FXH9|PEPVL_STAA8	Putative dipeptidase SAOUHSC_01868 OS=Staphylococcus aureus (strain NCTC 8325) GN=SAOUHSC_01868 PE=3 SV=1
sp|Q2FXI2|TRMB_STAA8 tRNA (guanine-N(7)-)-methyltransferase OS=Staphylococcus aureus (strain NCTC 8325) GN=trmB PE=3 SV=1	sp|Q2FXI2|TRMB_STAA8	tRNA (guanine-N(7)-)-methyltransferase OS=Staphylococcus aureus (strain NCTC 8325) GN=trmB PE=3 SV=1
sp|Q2FXI7|Y1859_STAA8 UPF0354 protein SAOUHSC_01859 OS=Staphylococcus aureus (strain NCTC 8325) GN=SAOUHSC_01859 PE=3 SV=1	sp|Q2FXI7|Y1859_STAA8	UPF0354 protein SAOUHSC_01859 OS=Staphylococcus aureus (strain NCTC 8325) GN=SAOUHSC_01859 PE=3 SV=1
sp|Q2FXJ0|MURC_STAA8 UDP-N-acetylmuramate--L-alanine ligase OS=Staphylococcus aureus (strain NCTC 8325) GN=murC PE=3 SV=1	sp|Q2FXJ0|MURC_STAA8	UDP-N-acetylmuramate--L-alanine ligase OS=Staphylococcus aureus (strain NCTC 8325) GN=murC PE=3 SV=1
sp|Q2FXJ5|SYY_STAA8 Tyrosine--tRNA ligase OS=Staphylococcus aureus (strain NCTC 8325) GN=tyrS PE=3 SV=1	sp|Q2FXJ5|SYY_STAA8	Tyrosine--tRNA ligase OS=Staphylococcus aureus (strain NCTC 8325) GN=tyrS PE=3 SV=1
sp|Q2FXK6|RS4_STAA8 30S ribosomal protein S4 OS=Staphylococcus aureus (strain NCTC 8325) GN=rpsD PE=1 SV=1	sp|Q2FXK6|RS4_STAA8	30S ribosomal protein S4 OS=Staphylococcus aureus (strain NCTC 8325) GN=rpsD PE=1 SV=1
sp|Q2FXK8|EZRA_STAA8 Septation ring formation regulator EzrA OS=Staphylococcus aureus (strain NCTC 8325) GN=ezrA PE=3 SV=1	sp|Q2FXK8|EZRA_STAA8	Septation ring formation regulator EzrA OS=Staphylococcus aureus (strain NCTC 8325) GN=ezrA PE=3 SV=1
sp|Q2FXL1|THII_STAA8 Probable tRNA sulfurtransferase OS=Staphylococcus aureus (strain NCTC 8325) GN=thiI PE=3 SV=1	sp|Q2FXL1|THII_STAA8	Probable tRNA sulfurtransferase OS=Staphylococcus aureus (strain NCTC 8325) GN=thiI PE=3 SV=1
sp|Q2FXL5|ACKA_STAA8 Acetate kinase OS=Staphylococcus aureus (strain NCTC 8325) GN=ackA PE=3 SV=1	sp|Q2FXL5|ACKA_STAA8	Acetate kinase OS=Staphylococcus aureus (strain NCTC 8325) GN=ackA PE=3 SV=1
sp|Q2FXL6|Y1819_STAA8 Putative universal stress protein SAOUHSC_01819 OS=Staphylococcus aureus (strain NCTC 8325) GN=SAOUHSC_01819 PE=3 SV=1	sp|Q2FXL6|Y1819_STAA8	Putative universal stress protein SAOUHSC_01819 OS=Staphylococcus aureus (strain NCTC 8325) GN=SAOUHSC_01819 PE=3 SV=1
sp|Q2FXL7|DHA2_STAA8 Alanine dehydrogenase 2 OS=Staphylococcus aureus (strain NCTC 8325) GN=ald2 PE=3 SV=1	sp|Q2FXL7|DHA2_STAA8	Alanine dehydrogenase 2 OS=Staphylococcus aureus (strain NCTC 8325) GN=ald2 PE=3 SV=1
sp|Q2FXL9|Y1816_STAA8 Uncharacterized peptidase SAOUHSC_01816 OS=Staphylococcus aureus (strain NCTC 8325) GN=SAOUHSC_01816 PE=3 SV=1	sp|Q2FXL9|Y1816_STAA8	Uncharacterized peptidase SAOUHSC_01816 OS=Staphylococcus aureus (strain NCTC 8325) GN=SAOUHSC_01816 PE=3 SV=1
sp|Q2FXM0|Y1815_STAA8 UPF0173 metal-dependent hydrolase SAOUHSC_01815 OS=Staphylococcus aureus (strain NCTC 8325) GN=SAOUHSC_01815 PE=3 SV=1	sp|Q2FXM0|Y1815_STAA8	UPF0173 metal-dependent hydrolase SAOUHSC_01815 OS=Staphylococcus aureus (strain NCTC 8325) GN=SAOUHSC_01815 PE=3 SV=1
sp|Q2FXM6|ACCD_STAA8 Acetyl-coenzyme A carboxylase carboxyl transferase subunit beta OS=Staphylococcus aureus (strain NCTC 8325) GN=accD PE=1 SV=1	sp|Q2FXM6|ACCD_STAA8	Acetyl-coenzyme A carboxylase carboxyl transferase subunit beta OS=Staphylococcus aureus (strain NCTC 8325) GN=accD PE=1 SV=1
sp|Q2FXM7|ACCA_STAA8 Acetyl-coenzyme A carboxylase carboxyl transferase subunit alpha OS=Staphylococcus aureus (strain NCTC 8325) GN=accA PE=1 SV=1	sp|Q2FXM7|ACCA_STAA8	Acetyl-coenzyme A carboxylase carboxyl transferase subunit alpha OS=Staphylococcus aureus (strain NCTC 8325) GN=accA PE=1 SV=1
sp|Q2FXM8|PFKA_STAA8 ATP-dependent 6-phosphofructokinase OS=Staphylococcus aureus (strain NCTC 8325) GN=pfkA PE=1 SV=2	sp|Q2FXM8|PFKA_STAA8	ATP-dependent 6-phosphofructokinase OS=Staphylococcus aureus (strain NCTC 8325) GN=pfkA PE=1 SV=2
sp|Q2FXM9|KPYK_STAA8 Pyruvate kinase OS=Staphylococcus aureus (strain NCTC 8325) GN=pyk PE=3 SV=1	sp|Q2FXM9|KPYK_STAA8	Pyruvate kinase OS=Staphylococcus aureus (strain NCTC 8325) GN=pyk PE=3 SV=1
sp|Q2FXP3|NRDR_STAA8 Transcriptional repressor NrdR OS=Staphylococcus aureus (strain NCTC 8325) GN=nrdR PE=3 SV=1	sp|Q2FXP3|NRDR_STAA8	Transcriptional repressor NrdR OS=Staphylococcus aureus (strain NCTC 8325) GN=nrdR PE=3 SV=1
sp|Q2FXP7|SYT_STAA8 Threonine--tRNA ligase OS=Staphylococcus aureus (strain NCTC 8325) GN=thrS PE=3 SV=1	sp|Q2FXP7|SYT_STAA8	Threonine--tRNA ligase OS=Staphylococcus aureus (strain NCTC 8325) GN=thrS PE=3 SV=1
sp|Q2FXP9|IF3_STAA8 Translation initiation factor IF-3 OS=Staphylococcus aureus (strain NCTC 8325) GN=infC PE=3 SV=1	sp|Q2FXP9|IF3_STAA8	Translation initiation factor IF-3 OS=Staphylococcus aureus (strain NCTC 8325) GN=infC PE=3 SV=1
sp|Q2FXQ0|RL35_STAA8 50S ribosomal protein L35 OS=Staphylococcus aureus (strain NCTC 8325) GN=rpmI PE=1 SV=1	sp|Q2FXQ0|RL35_STAA8	50S ribosomal protein L35 OS=Staphylococcus aureus (strain NCTC 8325) GN=rpmI PE=1 SV=1
sp|Q2FXQ1|RL20_STAA8 50S ribosomal protein L20 OS=Staphylococcus aureus (strain NCTC 8325) GN=rplT PE=1 SV=1	sp|Q2FXQ1|RL20_STAA8	50S ribosomal protein L20 OS=Staphylococcus aureus (strain NCTC 8325) GN=rplT PE=1 SV=1
sp|Q2FXQ6|TIG_STAA8 Trigger factor OS=Staphylococcus aureus (strain NCTC 8325) GN=tig PE=3 SV=1	sp|Q2FXQ6|TIG_STAA8	Trigger factor OS=Staphylococcus aureus (strain NCTC 8325) GN=tig PE=3 SV=1
sp|Q2FXQ7|CLPX_STAA8 ATP-dependent Clp protease ATP-binding subunit ClpX OS=Staphylococcus aureus (strain NCTC 8325) GN=clpX PE=3 SV=1	sp|Q2FXQ7|CLPX_STAA8	ATP-dependent Clp protease ATP-binding subunit ClpX OS=Staphylococcus aureus (strain NCTC 8325) GN=clpX PE=3 SV=1
sp|Q2FXQ8|ENGB_STAA8 Probable GTP-binding protein EngB OS=Staphylococcus aureus (strain NCTC 8325) GN=engB PE=3 SV=1	sp|Q2FXQ8|ENGB_STAA8	Probable GTP-binding protein EngB OS=Staphylococcus aureus (strain NCTC 8325) GN=engB PE=3 SV=1
sp|Q2FXR3|HEM2_STAA8 Delta-aminolevulinic acid dehydratase OS=Staphylococcus aureus (strain NCTC 8325) GN=hemB PE=3 SV=1	sp|Q2FXR3|HEM2_STAA8	Delta-aminolevulinic acid dehydratase OS=Staphylococcus aureus (strain NCTC 8325) GN=hemB PE=3 SV=1
sp|Q2FXR4|GSA1_STAA8 Glutamate-1-semialdehyde 2,1-aminomutase 1 OS=Staphylococcus aureus (strain NCTC 8325) GN=hemL1 PE=3 SV=1	sp|Q2FXR4|GSA1_STAA8	Glutamate-1-semialdehyde 2,1-aminomutase 1 OS=Staphylococcus aureus (strain NCTC 8325) GN=hemL1 PE=3 SV=1
sp|Q2FXR8|SYV_STAA8 Valine--tRNA ligase OS=Staphylococcus aureus (strain NCTC 8325) GN=valS PE=3 SV=1	sp|Q2FXR8|SYV_STAA8	Valine--tRNA ligase OS=Staphylococcus aureus (strain NCTC 8325) GN=valS PE=3 SV=1
sp|Q2FXS8|RL21_STAA8 50S ribosomal protein L21 OS=Staphylococcus aureus (strain NCTC 8325) GN=rplU PE=1 SV=1	sp|Q2FXS8|RL21_STAA8	50S ribosomal protein L21 OS=Staphylococcus aureus (strain NCTC 8325) GN=rplU PE=1 SV=1
sp|Q2FXT0|RL27_STAA8 50S ribosomal protein L27 OS=Staphylococcus aureus (strain NCTC 8325) GN=rpmA PE=1 SV=1	sp|Q2FXT0|RL27_STAA8	50S ribosomal protein L27 OS=Staphylococcus aureus (strain NCTC 8325) GN=rpmA PE=1 SV=1
sp|Q2FXT1|OBG_STAA8 GTPase Obg OS=Staphylococcus aureus (strain NCTC 8325) GN=obg PE=3 SV=1	sp|Q2FXT1|OBG_STAA8	GTPase Obg OS=Staphylococcus aureus (strain NCTC 8325) GN=obg PE=3 SV=1
sp|Q2FXT3|RUVA_STAA8 Holliday junction ATP-dependent DNA helicase RuvA OS=Staphylococcus aureus (strain NCTC 8325) GN=ruvA PE=3 SV=1	sp|Q2FXT3|RUVA_STAA8	Holliday junction ATP-dependent DNA helicase RuvA OS=Staphylococcus aureus (strain NCTC 8325) GN=ruvA PE=3 SV=1
sp|Q2FXT4|RUVB_STAA8 Holliday junction ATP-dependent DNA helicase RuvB OS=Staphylococcus aureus (strain NCTC 8325) GN=ruvB PE=3 SV=1	sp|Q2FXT4|RUVB_STAA8	Holliday junction ATP-dependent DNA helicase RuvB OS=Staphylococcus aureus (strain NCTC 8325) GN=ruvB PE=3 SV=1
sp|Q2FXT5|QUEA_STAA8 S-adenosylmethionine:tRNA ribosyltransferase-isomerase OS=Staphylococcus aureus (strain NCTC 8325) GN=queA PE=3 SV=1	sp|Q2FXT5|QUEA_STAA8	S-adenosylmethionine:tRNA ribosyltransferase-isomerase OS=Staphylococcus aureus (strain NCTC 8325) GN=queA PE=3 SV=1
sp|Q2FXT6|TGT_STAA8 Queuine tRNA-ribosyltransferase OS=Staphylococcus aureus (strain NCTC 8325) GN=tgt PE=3 SV=1	sp|Q2FXT6|TGT_STAA8	Queuine tRNA-ribosyltransferase OS=Staphylococcus aureus (strain NCTC 8325) GN=tgt PE=3 SV=1
sp|Q2FXU0|APT_STAA8 Adenine phosphoribosyltransferase OS=Staphylococcus aureus (strain NCTC 8325) GN=apt PE=3 SV=1	sp|Q2FXU0|APT_STAA8	Adenine phosphoribosyltransferase OS=Staphylococcus aureus (strain NCTC 8325) GN=apt PE=3 SV=1
sp|Q2FXU2|DTD_STAA8 D-aminoacyl-tRNA deacylase OS=Staphylococcus aureus (strain NCTC 8325) GN=dtd PE=3 SV=1	sp|Q2FXU2|DTD_STAA8	D-aminoacyl-tRNA deacylase OS=Staphylococcus aureus (strain NCTC 8325) GN=dtd PE=3 SV=1
sp|Q2FXU3|LYTH_STAA8 Probable cell wall amidase LytH OS=Staphylococcus aureus (strain NCTC 8325) GN=lytH PE=3 SV=1	sp|Q2FXU3|LYTH_STAA8	Probable cell wall amidase LytH OS=Staphylococcus aureus (strain NCTC 8325) GN=lytH PE=3 SV=1
sp|Q2FXU4|SYH_STAA8 Histidine--tRNA ligase OS=Staphylococcus aureus (strain NCTC 8325) GN=hisS PE=3 SV=1	sp|Q2FXU4|SYH_STAA8	Histidine--tRNA ligase OS=Staphylococcus aureus (strain NCTC 8325) GN=hisS PE=3 SV=1
sp|Q2FXU5|SYD_STAA8 Aspartate--tRNA ligase OS=Staphylococcus aureus (strain NCTC 8325) GN=aspS PE=3 SV=1	sp|Q2FXU5|SYD_STAA8	Aspartate--tRNA ligase OS=Staphylococcus aureus (strain NCTC 8325) GN=aspS PE=3 SV=1
sp|Q2FXV1|Y1730_STAA8 UPF0337 protein SAOUHSC_01730 OS=Staphylococcus aureus (strain NCTC 8325) GN=SAOUHSC_01730 PE=3 SV=1	sp|Q2FXV1|Y1730_STAA8	UPF0337 protein SAOUHSC_01730 OS=Staphylococcus aureus (strain NCTC 8325) GN=SAOUHSC_01730 PE=3 SV=1
sp|Q2FXV6|MNMA_STAA8 tRNA-specific 2-thiouridylase MnmA OS=Staphylococcus aureus (strain NCTC 8325) GN=mnmA PE=3 SV=2	sp|Q2FXV6|MNMA_STAA8	tRNA-specific 2-thiouridylase MnmA OS=Staphylococcus aureus (strain NCTC 8325) GN=mnmA PE=3 SV=2
sp|Q2FXV9|SYA_STAA8 Alanine--tRNA ligase OS=Staphylococcus aureus (strain NCTC 8325) GN=alaS PE=3 SV=1	sp|Q2FXV9|SYA_STAA8	Alanine--tRNA ligase OS=Staphylococcus aureus (strain NCTC 8325) GN=alaS PE=3 SV=1
sp|Q2FXW0|Y1721_STAA8 UPF0297 protein SAOUHSC_01721 OS=Staphylococcus aureus (strain NCTC 8325) GN=SAOUHSC_01721 PE=3 SV=1	sp|Q2FXW0|Y1721_STAA8	UPF0297 protein SAOUHSC_01721 OS=Staphylococcus aureus (strain NCTC 8325) GN=SAOUHSC_01721 PE=3 SV=1
sp|Q2FXW1|YQGF_STAA8 Putative pre-16S rRNA nuclease OS=Staphylococcus aureus (strain NCTC 8325) GN=SAOUHSC_01720 PE=3 SV=1	sp|Q2FXW1|YQGF_STAA8	Putative pre-16S rRNA nuclease OS=Staphylococcus aureus (strain NCTC 8325) GN=SAOUHSC_01720 PE=3 SV=1
sp|Q2FXW2|Y1719_STAA8 UPF0473 protein SAOUHSC_01719 OS=Staphylococcus aureus (strain NCTC 8325) GN=SAOUHSC_01719 PE=3 SV=1	sp|Q2FXW2|Y1719_STAA8	UPF0473 protein SAOUHSC_01719 OS=Staphylococcus aureus (strain NCTC 8325) GN=SAOUHSC_01719 PE=3 SV=1
sp|Q2FXW6|URK_STAA8 Uridine kinase OS=Staphylococcus aureus (strain NCTC 8325) GN=udk PE=3 SV=1	sp|Q2FXW6|URK_STAA8	Uridine kinase OS=Staphylococcus aureus (strain NCTC 8325) GN=udk PE=3 SV=1
sp|Q2FXW7|GREA_STAA8 Transcription elongation factor GreA OS=Staphylococcus aureus (strain NCTC 8325) GN=greA PE=3 SV=1	sp|Q2FXW7|GREA_STAA8	Transcription elongation factor GreA OS=Staphylococcus aureus (strain NCTC 8325) GN=greA PE=3 SV=1
sp|Q2FXX8|MTNN_STAA8 5-methylthioadenosine/S-adenosylhomocysteine nucleosidase OS=Staphylococcus aureus (strain NCTC 8325) GN=mtnN PE=3 SV=1	sp|Q2FXX8|MTNN_STAA8	5-methylthioadenosine/S-adenosylhomocysteine nucleosidase OS=Staphylococcus aureus (strain NCTC 8325) GN=mtnN PE=3 SV=1
sp|Q2FXY1|AROE_STAA8 Shikimate dehydrogenase (NADP(+)) OS=Staphylococcus aureus (strain NCTC 8325) GN=aroE PE=3 SV=1	sp|Q2FXY1|AROE_STAA8	Shikimate dehydrogenase (NADP(+)) OS=Staphylococcus aureus (strain NCTC 8325) GN=aroE PE=3 SV=1
sp|Q2FXY6|RS20_STAA8 30S ribosomal protein S20 OS=Staphylococcus aureus (strain NCTC 8325) GN=rpsT PE=1 SV=1	sp|Q2FXY6|RS20_STAA8	30S ribosomal protein S20 OS=Staphylococcus aureus (strain NCTC 8325) GN=rpsT PE=1 SV=1
sp|Q2FXY7|LEPA_STAA8 Elongation factor 4 OS=Staphylococcus aureus (strain NCTC 8325) GN=lepA PE=1 SV=1	sp|Q2FXY7|LEPA_STAA8	Elongation factor 4 OS=Staphylococcus aureus (strain NCTC 8325) GN=lepA PE=1 SV=1
sp|Q2FXZ1|GRPE_STAA8 Protein GrpE OS=Staphylococcus aureus (strain NCTC 8325) GN=grpE PE=3 SV=1	sp|Q2FXZ1|GRPE_STAA8	Protein GrpE OS=Staphylococcus aureus (strain NCTC 8325) GN=grpE PE=3 SV=1
sp|Q2FXZ2|DNAK_STAA8 Chaperone protein DnaK OS=Staphylococcus aureus (strain NCTC 8325) GN=dnaK PE=3 SV=1	sp|Q2FXZ2|DNAK_STAA8	Chaperone protein DnaK OS=Staphylococcus aureus (strain NCTC 8325) GN=dnaK PE=3 SV=1
sp|Q2FXZ3|DNAJ_STAA8 Chaperone protein DnaJ OS=Staphylococcus aureus (strain NCTC 8325) GN=dnaJ PE=3 SV=1	sp|Q2FXZ3|DNAJ_STAA8	Chaperone protein DnaJ OS=Staphylococcus aureus (strain NCTC 8325) GN=dnaJ PE=3 SV=1
sp|Q2FXZ4|PRMA_STAA8 Ribosomal protein L11 methyltransferase OS=Staphylococcus aureus (strain NCTC 8325) GN=prmA PE=3 SV=1	sp|Q2FXZ4|PRMA_STAA8	Ribosomal protein L11 methyltransferase OS=Staphylococcus aureus (strain NCTC 8325) GN=prmA PE=3 SV=1
sp|Q2FXZ7|RS21_STAA8 30S ribosomal protein S21 OS=Staphylococcus aureus (strain NCTC 8325) GN=rpsU PE=1 SV=1	sp|Q2FXZ7|RS21_STAA8	30S ribosomal protein S21 OS=Staphylococcus aureus (strain NCTC 8325) GN=rpsU PE=1 SV=1
sp|Q2FXZ9|Y1676_STAA8 UPF0365 protein SAOUHSC_01676 OS=Staphylococcus aureus (strain NCTC 8325) GN=SAOUHSC_01676 PE=3 SV=1	sp|Q2FXZ9|Y1676_STAA8	UPF0365 protein SAOUHSC_01676 OS=Staphylococcus aureus (strain NCTC 8325) GN=SAOUHSC_01676 PE=3 SV=1
sp|Q2FY02|YBEY_STAA8 Endoribonuclease YbeY OS=Staphylococcus aureus (strain NCTC 8325) GN=ybeY PE=3 SV=1	sp|Q2FY02|YBEY_STAA8	Endoribonuclease YbeY OS=Staphylococcus aureus (strain NCTC 8325) GN=ybeY PE=3 SV=1
sp|Q2FY06|ERA_STAA8 GTPase Era OS=Staphylococcus aureus (strain NCTC 8325) GN=era PE=3 SV=2	sp|Q2FY06|ERA_STAA8	GTPase Era OS=Staphylococcus aureus (strain NCTC 8325) GN=era PE=3 SV=2
sp|Q2FY08|SYG_STAA8 Glycine--tRNA ligase OS=Staphylococcus aureus (strain NCTC 8325) GN=glyQS PE=3 SV=1	sp|Q2FY08|SYG_STAA8	Glycine--tRNA ligase OS=Staphylococcus aureus (strain NCTC 8325) GN=glyQS PE=3 SV=1
sp|Q2FY10|PDRP_STAA8 Putative pyruvate, phosphate dikinase regulatory protein OS=Staphylococcus aureus (strain NCTC 8325) GN=SAOUHSC_01664 PE=3 SV=1	sp|Q2FY10|PDRP_STAA8	Putative pyruvate, phosphate dikinase regulatory protein OS=Staphylococcus aureus (strain NCTC 8325) GN=SAOUHSC_01664 PE=3 SV=1
sp|Q2FY15|CSHB_STAA8 DEAD-box ATP-dependent RNA helicase CshB OS=Staphylococcus aureus (strain NCTC 8325) GN=cshB PE=3 SV=1	sp|Q2FY15|CSHB_STAA8	DEAD-box ATP-dependent RNA helicase CshB OS=Staphylococcus aureus (strain NCTC 8325) GN=cshB PE=3 SV=1
sp|Q2FY16|END4_STAA8 Probable endonuclease 4 OS=Staphylococcus aureus (strain NCTC 8325) GN=nfo PE=3 SV=1	sp|Q2FY16|END4_STAA8	Probable endonuclease 4 OS=Staphylococcus aureus (strain NCTC 8325) GN=nfo PE=3 SV=1
sp|Q2FY19|FUR_STAA8 Ferric uptake regulation protein OS=Staphylococcus aureus (strain NCTC 8325) GN=fur PE=3 SV=1	sp|Q2FY19|FUR_STAA8	Ferric uptake regulation protein OS=Staphylococcus aureus (strain NCTC 8325) GN=fur PE=3 SV=1
sp|Q2FY33|GCST_STAA8 Aminomethyltransferase OS=Staphylococcus aureus (strain NCTC 8325) GN=gcvT PE=3 SV=1	sp|Q2FY33|GCST_STAA8	Aminomethyltransferase OS=Staphylococcus aureus (strain NCTC 8325) GN=gcvT PE=3 SV=1
sp|Q2FY34|GCSPA_STAA8 Probable glycine dehydrogenase (decarboxylating) subunit 1 OS=Staphylococcus aureus (strain NCTC 8325) GN=gcvPA PE=3 SV=1	sp|Q2FY34|GCSPA_STAA8	Probable glycine dehydrogenase (decarboxylating) subunit 1 OS=Staphylococcus aureus (strain NCTC 8325) GN=gcvPA PE=3 SV=1
sp|Q2FY35|GCSPB_STAA8 Probable glycine dehydrogenase (decarboxylating) subunit 2 OS=Staphylococcus aureus (strain NCTC 8325) GN=gcvPB PE=3 SV=1	sp|Q2FY35|GCSPB_STAA8	Probable glycine dehydrogenase (decarboxylating) subunit 2 OS=Staphylococcus aureus (strain NCTC 8325) GN=gcvPB PE=3 SV=1
sp|Q2FY37|LIPM_STAA8 Octanoyltransferase LipM OS=Staphylococcus aureus (strain NCTC 8325) GN=lipM PE=3 SV=1	sp|Q2FY37|LIPM_STAA8	Octanoyltransferase LipM OS=Staphylococcus aureus (strain NCTC 8325) GN=lipM PE=3 SV=1
sp|Q2FY41|EFP_STAA8 Elongation factor P OS=Staphylococcus aureus (strain NCTC 8325) GN=efp PE=3 SV=1	sp|Q2FY41|EFP_STAA8	Elongation factor P OS=Staphylococcus aureus (strain NCTC 8325) GN=efp PE=3 SV=1
sp|Q2FY45|NUSB_STAA8 Transcription antitermination protein NusB OS=Staphylococcus aureus (strain NCTC 8325) GN=nusB PE=3 SV=1	sp|Q2FY45|NUSB_STAA8	Transcription antitermination protein NusB OS=Staphylococcus aureus (strain NCTC 8325) GN=nusB PE=3 SV=1
sp|Q2FY46|EX7L_STAA8 Exodeoxyribonuclease 7 large subunit OS=Staphylococcus aureus (strain NCTC 8325) GN=xseA PE=3 SV=1	sp|Q2FY46|EX7L_STAA8	Exodeoxyribonuclease 7 large subunit OS=Staphylococcus aureus (strain NCTC 8325) GN=xseA PE=3 SV=1
sp|Q2FY47|EX7S_STAA8 Exodeoxyribonuclease 7 small subunit OS=Staphylococcus aureus (strain NCTC 8325) GN=xseB PE=3 SV=1	sp|Q2FY47|EX7S_STAA8	Exodeoxyribonuclease 7 small subunit OS=Staphylococcus aureus (strain NCTC 8325) GN=xseB PE=3 SV=1
sp|Q2FY49|ARGR_STAA8 Arginine repressor OS=Staphylococcus aureus (strain NCTC 8325) GN=argR PE=3 SV=1	sp|Q2FY49|ARGR_STAA8	Arginine repressor OS=Staphylococcus aureus (strain NCTC 8325) GN=argR PE=3 SV=1
sp|Q2FY55|Y1610_STAA8 UPF0403 protein SAOUHSC_01610 OS=Staphylococcus aureus (strain NCTC 8325) GN=SAOUHSC_01610 PE=3 SV=1	sp|Q2FY55|Y1610_STAA8	UPF0403 protein SAOUHSC_01610 OS=Staphylococcus aureus (strain NCTC 8325) GN=SAOUHSC_01610 PE=3 SV=1
sp|Q2FY67|RNZ_STAA8 Ribonuclease Z OS=Staphylococcus aureus (strain NCTC 8325) GN=rnz PE=3 SV=1	sp|Q2FY67|RNZ_STAA8	Ribonuclease Z OS=Staphylococcus aureus (strain NCTC 8325) GN=rnz PE=3 SV=1
sp|Q2FY77|SCPB_STAA8 Segregation and condensation protein B OS=Staphylococcus aureus (strain NCTC 8325) GN=scpB PE=3 SV=1	sp|Q2FY77|SCPB_STAA8	Segregation and condensation protein B OS=Staphylococcus aureus (strain NCTC 8325) GN=scpB PE=3 SV=1
sp|Q2FY79|SRRA_STAA8 Transcriptional regulatory protein SrrA OS=Staphylococcus aureus (strain NCTC 8325) GN=srrA PE=3 SV=1	sp|Q2FY79|SRRA_STAA8	Transcriptional regulatory protein SrrA OS=Staphylococcus aureus (strain NCTC 8325) GN=srrA PE=3 SV=1
sp|Q2FY80|SRRB_STAA8 Sensor protein SrrB OS=Staphylococcus aureus (strain NCTC 8325) GN=srrB PE=3 SV=1	sp|Q2FY80|SRRB_STAA8	Sensor protein SrrB OS=Staphylococcus aureus (strain NCTC 8325) GN=srrB PE=3 SV=1
sp|Q2FYF1|EBPS_STAA8 Elastin-binding protein EbpS OS=Staphylococcus aureus (strain NCTC 8325) GN=ebpS PE=1 SV=1	sp|Q2FYF1|EBPS_STAA8	Elastin-binding protein EbpS OS=Staphylococcus aureus (strain NCTC 8325) GN=ebpS PE=1 SV=1
sp|Q2FYG0|DER_STAA8 GTPase Der OS=Staphylococcus aureus (strain NCTC 8325) GN=der PE=3 SV=1	sp|Q2FYG0|DER_STAA8	GTPase Der OS=Staphylococcus aureus (strain NCTC 8325) GN=der PE=3 SV=1
sp|Q2FYG1|GPDA_STAA8 Glycerol-3-phosphate dehydrogenase [NAD(P)+] OS=Staphylococcus aureus (strain NCTC 8325) GN=gpsA PE=3 SV=1	sp|Q2FYG1|GPDA_STAA8	Glycerol-3-phosphate dehydrogenase [NAD(P)+] OS=Staphylococcus aureus (strain NCTC 8325) GN=gpsA PE=3 SV=1
sp|Q2FYG7|NDK_STAA8 Nucleoside diphosphate kinase OS=Staphylococcus aureus (strain NCTC 8325) GN=ndk PE=3 SV=2	sp|Q2FYG7|NDK_STAA8	Nucleoside diphosphate kinase OS=Staphylococcus aureus (strain NCTC 8325) GN=ndk PE=3 SV=2
sp|Q2FYG9|AROC_STAA8 Chorismate synthase OS=Staphylococcus aureus (strain NCTC 8325) GN=aroC PE=3 SV=1	sp|Q2FYG9|AROC_STAA8	Chorismate synthase OS=Staphylococcus aureus (strain NCTC 8325) GN=aroC PE=3 SV=1
sp|Q2FYH5|DING_STAA8 Probable ATP-dependent helicase DinG homolog OS=Staphylococcus aureus (strain NCTC 8325) GN=dinG PE=2 SV=1	sp|Q2FYH5|DING_STAA8	Probable ATP-dependent helicase DinG homolog OS=Staphylococcus aureus (strain NCTC 8325) GN=dinG PE=2 SV=1
sp|Q2FYH6|SYN_STAA8 Asparagine--tRNA ligase OS=Staphylococcus aureus (strain NCTC 8325) GN=asnS PE=3 SV=1	sp|Q2FYH6|SYN_STAA8	Asparagine--tRNA ligase OS=Staphylococcus aureus (strain NCTC 8325) GN=asnS PE=3 SV=1
sp|Q2FYI5|GPSB_STAA8 Cell cycle protein GpsB OS=Staphylococcus aureus (strain NCTC 8325) GN=gpsB PE=3 SV=1	sp|Q2FYI5|GPSB_STAA8	Cell cycle protein GpsB OS=Staphylococcus aureus (strain NCTC 8325) GN=gpsB PE=3 SV=1
sp|Q2FYK3|CVFC_STAA8 Conserved virulence factor C OS=Staphylococcus aureus (strain NCTC 8325) GN=cvfC PE=3 SV=1	sp|Q2FYK3|CVFC_STAA8	Conserved virulence factor C OS=Staphylococcus aureus (strain NCTC 8325) GN=cvfC PE=3 SV=1
sp|Q2FYK4|Y1436_STAA8 UPF0403 protein SAOUHSC_01436 OS=Staphylococcus aureus (strain NCTC 8325) GN=SAOUHSC_01436 PE=3 SV=1	sp|Q2FYK4|Y1436_STAA8	UPF0403 protein SAOUHSC_01436 OS=Staphylococcus aureus (strain NCTC 8325) GN=SAOUHSC_01436 PE=3 SV=1
sp|Q2FYK5|TYSY_STAA8 Thymidylate synthase OS=Staphylococcus aureus (strain NCTC 8325) GN=thyA PE=3 SV=1	sp|Q2FYK5|TYSY_STAA8	Thymidylate synthase OS=Staphylococcus aureus (strain NCTC 8325) GN=thyA PE=3 SV=1
sp|Q2FYL1|Y1429_STAA8 UPF0346 protein SAOUHSC_01429 OS=Staphylococcus aureus (strain NCTC 8325) GN=SAOUHSC_01429 PE=3 SV=1	sp|Q2FYL1|Y1429_STAA8	UPF0346 protein SAOUHSC_01429 OS=Staphylococcus aureus (strain NCTC 8325) GN=SAOUHSC_01429 PE=3 SV=1
sp|Q2FYL5|MURG_STAA8 UDP-N-acetylglucosamine--N-acetylmuramyl-(pentapeptide) pyrophosphoryl-undecaprenol N-acetylglucosamine transferase OS=Staphylococcus aureus (strain NCTC 8325) GN=murG PE=3 SV=1	sp|Q2FYL5|MURG_STAA8	UDP-N-acetylglucosamine--N-acetylmuramyl-(pentapeptide) pyrophosphoryl-undecaprenol N-acetylglucosamine transferase OS=Staphylococcus aureus (strain NCTC 8325) GN=murG PE=3 SV=1
sp|Q2FYM1|ODO1_STAA8 2-oxoglutarate dehydrogenase E1 component OS=Staphylococcus aureus (strain NCTC 8325) GN=odhA PE=3 SV=1	sp|Q2FYM1|ODO1_STAA8	2-oxoglutarate dehydrogenase E1 component OS=Staphylococcus aureus (strain NCTC 8325) GN=odhA PE=3 SV=1
sp|Q2FYM2|ODO2_STAA8 Dihydrolipoyllysine-residue succinyltransferase component of 2-oxoglutarate dehydrogenase complex OS=Staphylococcus aureus (strain NCTC 8325) GN=odhB PE=3 SV=1	sp|Q2FYM2|ODO2_STAA8	Dihydrolipoyllysine-residue succinyltransferase component of 2-oxoglutarate dehydrogenase complex OS=Staphylococcus aureus (strain NCTC 8325) GN=odhB PE=3 SV=1
sp|Q2FYM7|TELL_STAA8 TelA-like protein SAOUHSC_01408 OS=Staphylococcus aureus (strain NCTC 8325) GN=SAOUHSC_01408 PE=3 SV=1	sp|Q2FYM7|TELL_STAA8	TelA-like protein SAOUHSC_01408 OS=Staphylococcus aureus (strain NCTC 8325) GN=SAOUHSC_01408 PE=3 SV=1
sp|Q2FYN2|CSPA_STAA8 Cold shock protein CspA OS=Staphylococcus aureus (strain NCTC 8325) GN=cspA PE=1 SV=1	sp|Q2FYN2|CSPA_STAA8	Cold shock protein CspA OS=Staphylococcus aureus (strain NCTC 8325) GN=cspA PE=1 SV=1
sp|Q2FYN7|DAPH_STAA8 2,3,4,5-tetrahydropyridine-2,6-dicarboxylate N-acetyltransferase OS=Staphylococcus aureus (strain NCTC 8325) GN=dapH PE=3 SV=1	sp|Q2FYN7|DAPH_STAA8	2,3,4,5-tetrahydropyridine-2,6-dicarboxylate N-acetyltransferase OS=Staphylococcus aureus (strain NCTC 8325) GN=dapH PE=3 SV=1
sp|Q2FYP3|CVFB_STAA8 Conserved virulence factor B OS=Staphylococcus aureus (strain NCTC 8325) GN=cvfB PE=1 SV=1	sp|Q2FYP3|CVFB_STAA8	Conserved virulence factor B OS=Staphylococcus aureus (strain NCTC 8325) GN=cvfB PE=1 SV=1
sp|Q2FYR1|FEMB_STAA8 Aminoacyltransferase FemB OS=Staphylococcus aureus (strain NCTC 8325) GN=femB PE=1 SV=1	sp|Q2FYR1|FEMB_STAA8	Aminoacyltransferase FemB OS=Staphylococcus aureus (strain NCTC 8325) GN=femB PE=1 SV=1
sp|Q2FYR2|FEMA_STAA8 Aminoacyltransferase FemA OS=Staphylococcus aureus (strain NCTC 8325) GN=femA PE=1 SV=1	sp|Q2FYR2|FEMA_STAA8	Aminoacyltransferase FemA OS=Staphylococcus aureus (strain NCTC 8325) GN=femA PE=1 SV=1
sp|Q2FYR5|TRPF_STAA8 N-(5-phosphoribosyl)anthranilate isomerase OS=Staphylococcus aureus (strain NCTC 8325) GN=trpF PE=3 SV=1	sp|Q2FYR5|TRPF_STAA8	N-(5-phosphoribosyl)anthranilate isomerase OS=Staphylococcus aureus (strain NCTC 8325) GN=trpF PE=3 SV=1
sp|Q2FYS4|PARC_STAA8 DNA topoisomerase 4 subunit A OS=Staphylococcus aureus (strain NCTC 8325) GN=parC PE=1 SV=1	sp|Q2FYS4|PARC_STAA8	DNA topoisomerase 4 subunit A OS=Staphylococcus aureus (strain NCTC 8325) GN=parC PE=1 SV=1
sp|Q2FYS5|PARE_STAA8 DNA topoisomerase 4 subunit B OS=Staphylococcus aureus (strain NCTC 8325) GN=parE PE=3 SV=1	sp|Q2FYS5|PARE_STAA8	DNA topoisomerase 4 subunit B OS=Staphylococcus aureus (strain NCTC 8325) GN=parE PE=3 SV=1
sp|Q2FYS6|PLSY_STAA8 Glycerol-3-phosphate acyltransferase OS=Staphylococcus aureus (strain NCTC 8325) GN=plsY PE=3 SV=1	sp|Q2FYS6|PLSY_STAA8	Glycerol-3-phosphate acyltransferase OS=Staphylococcus aureus (strain NCTC 8325) GN=plsY PE=3 SV=1
sp|Q2FYS7|Y1349_STAA8 Uncharacterized protein SAOUHSC_01349 OS=Staphylococcus aureus (strain NCTC 8325) GN=SAOUHSC_01349 PE=3 SV=1	sp|Q2FYS7|Y1349_STAA8	Uncharacterized protein SAOUHSC_01349 OS=Staphylococcus aureus (strain NCTC 8325) GN=SAOUHSC_01349 PE=3 SV=1
sp|Q2FYT3|SBCC_STAA8 Nuclease SbcCD subunit C OS=Staphylococcus aureus (strain NCTC 8325) GN=sbcC PE=1 SV=2	sp|Q2FYT3|SBCC_STAA8	Nuclease SbcCD subunit C OS=Staphylococcus aureus (strain NCTC 8325) GN=sbcC PE=1 SV=2
sp|Q2FYU1|LEXA_STAA8 LexA repressor OS=Staphylococcus aureus (strain NCTC 8325) GN=lexA PE=3 SV=1	sp|Q2FYU1|LEXA_STAA8	LexA repressor OS=Staphylococcus aureus (strain NCTC 8325) GN=lexA PE=3 SV=1
sp|Q2FYU4|GUAC_STAA8 GMP reductase OS=Staphylococcus aureus (strain NCTC 8325) GN=guaC PE=3 SV=1	sp|Q2FYU4|GUAC_STAA8	GMP reductase OS=Staphylococcus aureus (strain NCTC 8325) GN=guaC PE=3 SV=1
sp|Q2FYU6|RL331_STAA8 50S ribosomal protein L33 1 OS=Staphylococcus aureus (strain NCTC 8325) GN=rpmG1 PE=1 SV=1;sp|Q2FY22|RL332_STAA8 50S ribosomal protein L33 2 OS=Staphylococcus aureus (strain NCTC 8325) GN=rpmG2 PE=1 SV=1	sp|Q2FYU6|RL331_STAA8	50S ribosomal protein L33 1 OS=Staphylococcus aureus (strain NCTC 8325) GN=rpmG1 PE=1 SV=1;sp|Q2FY22|RL332_STAA8	50S ribosomal protein L33 2 OS=Staphylococcus aureus (strain NCTC 8325) GN=rpmG2 PE=1 SV=1
sp|Q2FYU7|CATA_STAA8 Catalase OS=Staphylococcus aureus (strain NCTC 8325) GN=katA PE=2 SV=2	sp|Q2FYU7|CATA_STAA8	Catalase OS=Staphylococcus aureus (strain NCTC 8325) GN=katA PE=2 SV=2
sp|Q2FYZ2|MIAA_STAA8 tRNA dimethylallyltransferase OS=Staphylococcus aureus (strain NCTC 8325) GN=miaA PE=3 SV=1	sp|Q2FYZ2|MIAA_STAA8	tRNA dimethylallyltransferase OS=Staphylococcus aureus (strain NCTC 8325) GN=miaA PE=3 SV=1
sp|Q2FYZ4|GLPD_STAA8 Aerobic glycerol-3-phosphate dehydrogenase OS=Staphylococcus aureus (strain NCTC 8325) GN=glpD PE=3 SV=1	sp|Q2FYZ4|GLPD_STAA8	Aerobic glycerol-3-phosphate dehydrogenase OS=Staphylococcus aureus (strain NCTC 8325) GN=glpD PE=3 SV=1
sp|Q2FYZ5|GLPK_STAA8 Glycerol kinase OS=Staphylococcus aureus (strain NCTC 8325) GN=glpK PE=3 SV=1	sp|Q2FYZ5|GLPK_STAA8	Glycerol kinase OS=Staphylococcus aureus (strain NCTC 8325) GN=glpK PE=3 SV=1
sp|Q2FYZ9|MUTS_STAA8 DNA mismatch repair protein MutS OS=Staphylococcus aureus (strain NCTC 8325) GN=mutS PE=3 SV=2	sp|Q2FYZ9|MUTS_STAA8	DNA mismatch repair protein MutS OS=Staphylococcus aureus (strain NCTC 8325) GN=mutS PE=3 SV=2
sp|Q2FZ02|MIAB_STAA8 tRNA-2-methylthio-N(6)-dimethylallyladenosine synthase OS=Staphylococcus aureus (strain NCTC 8325) GN=miaB PE=3 SV=1	sp|Q2FZ02|MIAB_STAA8	tRNA-2-methylthio-N(6)-dimethylallyladenosine synthase OS=Staphylococcus aureus (strain NCTC 8325) GN=miaB PE=3 SV=1
sp|Q2FZ08|RNY_STAA8 Ribonuclease Y OS=Staphylococcus aureus (strain NCTC 8325) GN=rny PE=1 SV=1	sp|Q2FZ08|RNY_STAA8	Ribonuclease Y OS=Staphylococcus aureus (strain NCTC 8325) GN=rny PE=1 SV=1
sp|Q2FZ19|RNJ2_STAA8 Ribonuclease J 2 OS=Staphylococcus aureus (strain NCTC 8325) GN=rnj2 PE=1 SV=2	sp|Q2FZ19|RNJ2_STAA8	Ribonuclease J 2 OS=Staphylococcus aureus (strain NCTC 8325) GN=rnj2 PE=1 SV=2
sp|Q2FZ20|PNP_STAA8 Polyribonucleotide nucleotidyltransferase OS=Staphylococcus aureus (strain NCTC 8325) GN=pnp PE=1 SV=1	sp|Q2FZ20|PNP_STAA8	Polyribonucleotide nucleotidyltransferase OS=Staphylococcus aureus (strain NCTC 8325) GN=pnp PE=1 SV=1
sp|Q2FZ21|RRF_STAA8 Ribosome-recycling factor OS=Staphylococcus aureus (strain NCTC 8325) GN=frr PE=3 SV=1	sp|Q2FZ21|RRF_STAA8	Ribosome-recycling factor OS=Staphylococcus aureus (strain NCTC 8325) GN=frr PE=3 SV=1
sp|Q2FZ22|PYRH_STAA8 Uridylate kinase OS=Staphylococcus aureus (strain NCTC 8325) GN=pyrH PE=1 SV=1	sp|Q2FZ22|PYRH_STAA8	Uridylate kinase OS=Staphylococcus aureus (strain NCTC 8325) GN=pyrH PE=1 SV=1
sp|Q2FZ23|EFTS_STAA8 Elongation factor Ts OS=Staphylococcus aureus (strain NCTC 8325) GN=tsf PE=3 SV=1	sp|Q2FZ23|EFTS_STAA8	Elongation factor Ts OS=Staphylococcus aureus (strain NCTC 8325) GN=tsf PE=3 SV=1
sp|Q2FZ25|RS2_STAA8 30S ribosomal protein S2 OS=Staphylococcus aureus (strain NCTC 8325) GN=rpsB PE=1 SV=2	sp|Q2FZ25|RS2_STAA8	30S ribosomal protein S2 OS=Staphylococcus aureus (strain NCTC 8325) GN=rpsB PE=1 SV=2
sp|Q2FZ27|CODY_STAA8 GTP-sensing transcriptional pleiotropic repressor CodY OS=Staphylococcus aureus (strain NCTC 8325) GN=codY PE=1 SV=1	sp|Q2FZ27|CODY_STAA8	GTP-sensing transcriptional pleiotropic repressor CodY OS=Staphylococcus aureus (strain NCTC 8325) GN=codY PE=1 SV=1
sp|Q2FZ28|HSLU_STAA8 ATP-dependent protease ATPase subunit HslU OS=Staphylococcus aureus (strain NCTC 8325) GN=hslU PE=3 SV=1	sp|Q2FZ28|HSLU_STAA8	ATP-dependent protease ATPase subunit HslU OS=Staphylococcus aureus (strain NCTC 8325) GN=hslU PE=3 SV=1
sp|Q2FZ29|HSLV_STAA8 ATP-dependent protease subunit HslV OS=Staphylococcus aureus (strain NCTC 8325) GN=hslV PE=3 SV=1	sp|Q2FZ29|HSLV_STAA8	ATP-dependent protease subunit HslV OS=Staphylococcus aureus (strain NCTC 8325) GN=hslV PE=3 SV=1
sp|Q2FZ31|TRMFO_STAA8 Methylenetetrahydrofolate--tRNA-(uracil-5-)-methyltransferase TrmFO OS=Staphylococcus aureus (strain NCTC 8325) GN=trmFO PE=3 SV=1	sp|Q2FZ31|TRMFO_STAA8	Methylenetetrahydrofolate--tRNA-(uracil-5-)-methyltransferase TrmFO OS=Staphylococcus aureus (strain NCTC 8325) GN=trmFO PE=3 SV=1
sp|Q2FZ32|TOP1_STAA8 DNA topoisomerase 1 OS=Staphylococcus aureus (strain NCTC 8325) GN=topA PE=3 SV=2	sp|Q2FZ32|TOP1_STAA8	DNA topoisomerase 1 OS=Staphylococcus aureus (strain NCTC 8325) GN=topA PE=3 SV=2
sp|Q2FZ37|SUCC_STAA8 Succinate--CoA ligase [ADP-forming] subunit beta OS=Staphylococcus aureus (strain NCTC 8325) GN=sucC PE=3 SV=1	sp|Q2FZ37|SUCC_STAA8	Succinate--CoA ligase [ADP-forming] subunit beta OS=Staphylococcus aureus (strain NCTC 8325) GN=sucC PE=3 SV=1
sp|Q2FZ42|RL19_STAA8 50S ribosomal protein L19 OS=Staphylococcus aureus (strain NCTC 8325) GN=rplS PE=1 SV=1	sp|Q2FZ42|RL19_STAA8	50S ribosomal protein L19 OS=Staphylococcus aureus (strain NCTC 8325) GN=rplS PE=1 SV=1
sp|Q2FZ43|TRMD_STAA8 tRNA (guanine-N(1)-)-methyltransferase OS=Staphylococcus aureus (strain NCTC 8325) GN=trmD PE=3 SV=1	sp|Q2FZ43|TRMD_STAA8	tRNA (guanine-N(1)-)-methyltransferase OS=Staphylococcus aureus (strain NCTC 8325) GN=trmD PE=3 SV=1
sp|Q2FZ44|RIMM_STAA8 Ribosome maturation factor RimM OS=Staphylococcus aureus (strain NCTC 8325) GN=rimM PE=3 SV=1	sp|Q2FZ44|RIMM_STAA8	Ribosome maturation factor RimM OS=Staphylococcus aureus (strain NCTC 8325) GN=rimM PE=3 SV=1
sp|Q2FZ45|RS16_STAA8 30S ribosomal protein S16 OS=Staphylococcus aureus (strain NCTC 8325) GN=rpsP PE=1 SV=1	sp|Q2FZ45|RS16_STAA8	30S ribosomal protein S16 OS=Staphylococcus aureus (strain NCTC 8325) GN=rpsP PE=1 SV=1
sp|Q2FZ50|RNC_STAA8 Ribonuclease 3 OS=Staphylococcus aureus (strain NCTC 8325) GN=rnc PE=3 SV=1	sp|Q2FZ50|RNC_STAA8	Ribonuclease 3 OS=Staphylococcus aureus (strain NCTC 8325) GN=rnc PE=3 SV=1
sp|Q2FZ51|ACP_STAA8 Acyl carrier protein OS=Staphylococcus aureus (strain NCTC 8325) GN=acpP PE=2 SV=1	sp|Q2FZ51|ACP_STAA8	Acyl carrier protein OS=Staphylococcus aureus (strain NCTC 8325) GN=acpP PE=2 SV=1
sp|Q2FZ55|PLSX_STAA8 Phosphate acyltransferase OS=Staphylococcus aureus (strain NCTC 8325) GN=plsX PE=3 SV=1	sp|Q2FZ55|PLSX_STAA8	Phosphate acyltransferase OS=Staphylococcus aureus (strain NCTC 8325) GN=plsX PE=3 SV=1
sp|Q2FZ58|Y1193_STAA8 Uncharacterized protein SAOUHSC_01193 OS=Staphylococcus aureus (strain NCTC 8325) GN=SAOUHSC_01193 PE=4 SV=1	sp|Q2FZ58|Y1193_STAA8	Uncharacterized protein SAOUHSC_01193 OS=Staphylococcus aureus (strain NCTC 8325) GN=SAOUHSC_01193 PE=4 SV=1
sp|Q2FZ60|RL28_STAA8 50S ribosomal protein L28 OS=Staphylococcus aureus (strain NCTC 8325) GN=rpmB PE=1 SV=1	sp|Q2FZ60|RL28_STAA8	50S ribosomal protein L28 OS=Staphylococcus aureus (strain NCTC 8325) GN=rpmB PE=1 SV=1
sp|Q2FZ66|RLMN_STAA8 Probable dual-specificity RNA methyltransferase RlmN OS=Staphylococcus aureus (strain NCTC 8325) GN=rlmN PE=3 SV=1	sp|Q2FZ66|RLMN_STAA8	Probable dual-specificity RNA methyltransferase RlmN OS=Staphylococcus aureus (strain NCTC 8325) GN=rlmN PE=3 SV=1
sp|Q2FZ68|FMT_STAA8 Methionyl-tRNA formyltransferase OS=Staphylococcus aureus (strain NCTC 8325) GN=fmt PE=3 SV=1	sp|Q2FZ68|FMT_STAA8	Methionyl-tRNA formyltransferase OS=Staphylococcus aureus (strain NCTC 8325) GN=fmt PE=3 SV=1
sp|Q2FZ71|PYRF_STAA8 Orotidine 5-phosphate decarboxylase OS=Staphylococcus aureus (strain NCTC 8325) GN=pyrF PE=3 SV=1	sp|Q2FZ71|PYRF_STAA8	Orotidine 5-phosphate decarboxylase OS=Staphylococcus aureus (strain NCTC 8325) GN=pyrF PE=3 SV=1
sp|Q2FZ72|CARB_STAA8 Carbamoyl-phosphate synthase large chain OS=Staphylococcus aureus (strain NCTC 8325) GN=carB PE=3 SV=1	sp|Q2FZ72|CARB_STAA8	Carbamoyl-phosphate synthase large chain OS=Staphylococcus aureus (strain NCTC 8325) GN=carB PE=3 SV=1
sp|Q2FZ75|PYRB_STAA8 Aspartate carbamoyltransferase OS=Staphylococcus aureus (strain NCTC 8325) GN=pyrB PE=3 SV=1	sp|Q2FZ75|PYRB_STAA8	Aspartate carbamoyltransferase OS=Staphylococcus aureus (strain NCTC 8325) GN=pyrB PE=3 SV=1
sp|Q2FZ77|PYRR_STAA8 Bifunctional protein PyrR OS=Staphylococcus aureus (strain NCTC 8325) GN=pyrR PE=3 SV=1	sp|Q2FZ77|PYRR_STAA8	Bifunctional protein PyrR OS=Staphylococcus aureus (strain NCTC 8325) GN=pyrR PE=3 SV=1
sp|Q2FZ82|SYI_STAA8 Isoleucine--tRNA ligase OS=Staphylococcus aureus (strain NCTC 8325) GN=ileS PE=3 SV=1	sp|Q2FZ82|SYI_STAA8	Isoleucine--tRNA ligase OS=Staphylococcus aureus (strain NCTC 8325) GN=ileS PE=3 SV=1
sp|Q2FZ86|SEPF_STAA8 Cell division protein SepF OS=Staphylococcus aureus (strain NCTC 8325) GN=sepF PE=3 SV=1	sp|Q2FZ86|SEPF_STAA8	Cell division protein SepF OS=Staphylococcus aureus (strain NCTC 8325) GN=sepF PE=3 SV=1
sp|Q2FZ89|FTSZ_STAA8 Cell division protein FtsZ OS=Staphylococcus aureus (strain NCTC 8325) GN=ftsZ PE=1 SV=1	sp|Q2FZ89|FTSZ_STAA8	Cell division protein FtsZ OS=Staphylococcus aureus (strain NCTC 8325) GN=ftsZ PE=1 SV=1
sp|Q2FZ91|DIVIB_STAA8 Cell division protein DivIB OS=Staphylococcus aureus (strain NCTC 8325) GN=divIB PE=3 SV=1	sp|Q2FZ91|DIVIB_STAA8	Cell division protein DivIB OS=Staphylococcus aureus (strain NCTC 8325) GN=divIB PE=3 SV=1
sp|Q2FZ92|MURD_STAA8 UDP-N-acetylmuramoylalanine--D-glutamate ligase OS=Staphylococcus aureus (strain NCTC 8325) GN=murD PE=3 SV=1	sp|Q2FZ92|MURD_STAA8	UDP-N-acetylmuramoylalanine--D-glutamate ligase OS=Staphylococcus aureus (strain NCTC 8325) GN=murD PE=3 SV=1
sp|Q2FZ95|FTSL_STAA8 Cell division protein FtsL OS=Staphylococcus aureus (strain NCTC 8325) GN=ftsL PE=3 SV=1	sp|Q2FZ95|FTSL_STAA8	Cell division protein FtsL OS=Staphylococcus aureus (strain NCTC 8325) GN=ftsL PE=3 SV=1
sp|Q2FZ97|MRAZ_STAA8 Transcriptional regulator MraZ OS=Staphylococcus aureus (strain NCTC 8325) GN=mraZ PE=3 SV=1	sp|Q2FZ97|MRAZ_STAA8	Transcriptional regulator MraZ OS=Staphylococcus aureus (strain NCTC 8325) GN=mraZ PE=3 SV=1
sp|Q2FZC6|MURI_STAA8 Glutamate racemase OS=Staphylococcus aureus (strain NCTC 8325) GN=murI PE=3 SV=1	sp|Q2FZC6|MURI_STAA8	Glutamate racemase OS=Staphylococcus aureus (strain NCTC 8325) GN=murI PE=3 SV=1
sp|Q2FZD2|THIO_STAA8 Thioredoxin OS=Staphylococcus aureus (strain NCTC 8325) GN=trxA PE=2 SV=1	sp|Q2FZD2|THIO_STAA8	Thioredoxin OS=Staphylococcus aureus (strain NCTC 8325) GN=trxA PE=2 SV=1
sp|Q2FZD3|MUTS2_STAA8 Endonuclease MutS2 OS=Staphylococcus aureus (strain NCTC 8325) GN=mutS2 PE=3 SV=1	sp|Q2FZD3|MUTS2_STAA8	Endonuclease MutS2 OS=Staphylococcus aureus (strain NCTC 8325) GN=mutS2 PE=3 SV=1
sp|Q2FZD9|SYFA_STAA8 Phenylalanine--tRNA ligase alpha subunit OS=Staphylococcus aureus (strain NCTC 8325) GN=pheS PE=3 SV=1	sp|Q2FZD9|SYFA_STAA8	Phenylalanine--tRNA ligase alpha subunit OS=Staphylococcus aureus (strain NCTC 8325) GN=pheS PE=3 SV=1
sp|Q2FZE9|ISDA_STAA8 Iron-regulated surface determinant protein A OS=Staphylococcus aureus (strain NCTC 8325) GN=isdA PE=1 SV=1	sp|Q2FZE9|ISDA_STAA8	Iron-regulated surface determinant protein A OS=Staphylococcus aureus (strain NCTC 8325) GN=isdA PE=1 SV=1
sp|Q2FZF1|RL32_STAA8 50S ribosomal protein L32 OS=Staphylococcus aureus (strain NCTC 8325) GN=rpmF PE=1 SV=2	sp|Q2FZF1|RL32_STAA8	50S ribosomal protein L32 OS=Staphylococcus aureus (strain NCTC 8325) GN=rpmF PE=1 SV=2
sp|Q2FZF5|COAD_STAA8 Phosphopantetheine adenylyltransferase OS=Staphylococcus aureus (strain NCTC 8325) GN=coaD PE=3 SV=1	sp|Q2FZF5|COAD_STAA8	Phosphopantetheine adenylyltransferase OS=Staphylococcus aureus (strain NCTC 8325) GN=coaD PE=3 SV=1
sp|Q2FZG8|Y1036_STAA8 UPF0356 protein SAOUHSC_01036 OS=Staphylococcus aureus (strain NCTC 8325) GN=SAOUHSC_01036 PE=3 SV=1	sp|Q2FZG8|Y1036_STAA8	UPF0356 protein SAOUHSC_01036 OS=Staphylococcus aureus (strain NCTC 8325) GN=SAOUHSC_01036 PE=3 SV=1
sp|Q2FZG9|RNJ1_STAA8 Ribonuclease J 1 OS=Staphylococcus aureus (strain NCTC 8325) GN=rnj1 PE=1 SV=1	sp|Q2FZG9|RNJ1_STAA8	Ribonuclease J 1 OS=Staphylococcus aureus (strain NCTC 8325) GN=rnj1 PE=1 SV=1
sp|Q2FZI6|PUR9_STAA8 Bifunctional purine biosynthesis protein PurH OS=Staphylococcus aureus (strain NCTC 8325) GN=purH PE=3 SV=1	sp|Q2FZI6|PUR9_STAA8	Bifunctional purine biosynthesis protein PurH OS=Staphylococcus aureus (strain NCTC 8325) GN=purH PE=3 SV=1
sp|Q2FZI8|PUR5_STAA8 Phosphoribosylformylglycinamidine cyclo-ligase OS=Staphylococcus aureus (strain NCTC 8325) GN=purM PE=3 SV=1	sp|Q2FZI8|PUR5_STAA8	Phosphoribosylformylglycinamidine cyclo-ligase OS=Staphylococcus aureus (strain NCTC 8325) GN=purM PE=3 SV=1
sp|Q2FZJ0|PURL_STAA8 Phosphoribosylformylglycinamidine synthase subunit PurL OS=Staphylococcus aureus (strain NCTC 8325) GN=purL PE=3 SV=1	sp|Q2FZJ0|PURL_STAA8	Phosphoribosylformylglycinamidine synthase subunit PurL OS=Staphylococcus aureus (strain NCTC 8325) GN=purL PE=3 SV=1
sp|Q2FZJ1|PURQ_STAA8 Phosphoribosylformylglycinamidine synthase subunit PurQ OS=Staphylococcus aureus (strain NCTC 8325) GN=purQ PE=3 SV=1	sp|Q2FZJ1|PURQ_STAA8	Phosphoribosylformylglycinamidine synthase subunit PurQ OS=Staphylococcus aureus (strain NCTC 8325) GN=purQ PE=3 SV=1
sp|Q2FZJ3|PUR7_STAA8 Phosphoribosylaminoimidazole-succinocarboxamide synthase OS=Staphylococcus aureus (strain NCTC 8325) GN=purC PE=3 SV=1	sp|Q2FZJ3|PUR7_STAA8	Phosphoribosylaminoimidazole-succinocarboxamide synthase OS=Staphylococcus aureus (strain NCTC 8325) GN=purC PE=3 SV=1
sp|Q2FZJ6|FOLD_STAA8 Bifunctional protein FolD OS=Staphylococcus aureus (strain NCTC 8325) GN=folD PE=3 SV=1	sp|Q2FZJ6|FOLD_STAA8	Bifunctional protein FolD OS=Staphylococcus aureus (strain NCTC 8325) GN=folD PE=3 SV=1
sp|Q2FZJ9|QOX2_STAA8 Probable quinol oxidase subunit 2 OS=Staphylococcus aureus (strain NCTC 8325) GN=qoxA PE=3 SV=1	sp|Q2FZJ9|QOX2_STAA8	Probable quinol oxidase subunit 2 OS=Staphylococcus aureus (strain NCTC 8325) GN=qoxA PE=3 SV=1
sp|Q2FZK0|QOX1_STAA8 Probable quinol oxidase subunit 1 OS=Staphylococcus aureus (strain NCTC 8325) GN=qoxB PE=3 SV=1	sp|Q2FZK0|QOX1_STAA8	Probable quinol oxidase subunit 1 OS=Staphylococcus aureus (strain NCTC 8325) GN=qoxB PE=3 SV=1
sp|Q2FZK7|ATL_STAA8 Bifunctional autolysin OS=Staphylococcus aureus (strain NCTC 8325) GN=atl PE=1 SV=1	sp|Q2FZK7|ATL_STAA8	Bifunctional autolysin OS=Staphylococcus aureus (strain NCTC 8325) GN=atl PE=1 SV=1
sp|Q2FZL7|MEND_STAA8 2-succinyl-5-enolpyruvyl-6-hydroxy-3-cyclohexene-1-carboxylate synthase OS=Staphylococcus aureus (strain NCTC 8325) GN=menD PE=3 SV=1	sp|Q2FZL7|MEND_STAA8	2-succinyl-5-enolpyruvyl-6-hydroxy-3-cyclohexene-1-carboxylate synthase OS=Staphylococcus aureus (strain NCTC 8325) GN=menD PE=3 SV=1
sp|Q2FZP2|HTRAL_STAA8 Serine protease HtrA-like OS=Staphylococcus aureus (strain NCTC 8325) GN=SAOUHSC_00958 PE=3 SV=2	sp|Q2FZP2|HTRAL_STAA8	Serine protease HtrA-like OS=Staphylococcus aureus (strain NCTC 8325) GN=SAOUHSC_00958 PE=3 SV=2
sp|Q2FZP4|RF3_STAA8 Peptide chain release factor 3 OS=Staphylococcus aureus (strain NCTC 8325) GN=prfC PE=3 SV=1	sp|Q2FZP4|RF3_STAA8	Peptide chain release factor 3 OS=Staphylococcus aureus (strain NCTC 8325) GN=prfC PE=3 SV=1
sp|Q2FZP6|MURE_STAA8 UDP-N-acetylmuramoyl-L-alanyl-D-glutamate--L-lysine ligase OS=Staphylococcus aureus (strain NCTC 8325) GN=murE PE=1 SV=1	sp|Q2FZP6|MURE_STAA8	UDP-N-acetylmuramoyl-L-alanyl-D-glutamate--L-lysine ligase OS=Staphylococcus aureus (strain NCTC 8325) GN=murE PE=1 SV=1
sp|Q2FZP7|UGTP_STAA8 Processive diacylglycerol beta-glucosyltransferase OS=Staphylococcus aureus (strain NCTC 8325) GN=ugtP PE=1 SV=1	sp|Q2FZP7|UGTP_STAA8	Processive diacylglycerol beta-glucosyltransferase OS=Staphylococcus aureus (strain NCTC 8325) GN=ugtP PE=1 SV=1
sp|Q2FZP9|Y951_STAA8 Putative phosphoesterase SAOUHSC_00951 OS=Staphylococcus aureus (strain NCTC 8325) GN=SAOUHSC_00951 PE=3 SV=1	sp|Q2FZP9|Y951_STAA8	Putative phosphoesterase SAOUHSC_00951 OS=Staphylococcus aureus (strain NCTC 8325) GN=SAOUHSC_00951 PE=3 SV=1
sp|Q2FZQ3|FABI_STAA8 Enoyl-[acyl-carrier-protein] reductase [NADPH] FabI OS=Staphylococcus aureus (strain NCTC 8325) GN=fabI PE=1 SV=1	sp|Q2FZQ3|FABI_STAA8	Enoyl-[acyl-carrier-protein] reductase [NADPH] FabI OS=Staphylococcus aureus (strain NCTC 8325) GN=fabI PE=1 SV=1
sp|Q2FZS0|FABH_STAA8 3-oxoacyl-[acyl-carrier-protein] synthase 3 OS=Staphylococcus aureus (strain NCTC 8325) GN=fabH PE=3 SV=1	sp|Q2FZS0|FABH_STAA8	3-oxoacyl-[acyl-carrier-protein] synthase 3 OS=Staphylococcus aureus (strain NCTC 8325) GN=fabH PE=3 SV=1
sp|Q2FZT4|Y906_STAA8 Uncharacterized protein SAOUHSC_00906 OS=Staphylococcus aureus (strain NCTC 8325) GN=SAOUHSC_00906 PE=3 SV=1	sp|Q2FZT4|Y906_STAA8	Uncharacterized protein SAOUHSC_00906 OS=Staphylococcus aureus (strain NCTC 8325) GN=SAOUHSC_00906 PE=3 SV=1
sp|Q2FZU0|G6PI_STAA8 Glucose-6-phosphate isomerase OS=Staphylococcus aureus (strain NCTC 8325) GN=pgi PE=3 SV=1	sp|Q2FZU0|G6PI_STAA8	Glucose-6-phosphate isomerase OS=Staphylococcus aureus (strain NCTC 8325) GN=pgi PE=3 SV=1
sp|Q2FZU1|ASSY_STAA8 Argininosuccinate synthase OS=Staphylococcus aureus (strain NCTC 8325) GN=argG PE=3 SV=1	sp|Q2FZU1|ASSY_STAA8	Argininosuccinate synthase OS=Staphylococcus aureus (strain NCTC 8325) GN=argG PE=3 SV=1
sp|Q2FZU9|PPI1_STAA8 Putative peptidyl-prolyl cis-trans isomerase OS=Staphylococcus aureus (strain NCTC 8325) GN=SAOUHSC_00891 PE=3 SV=1	sp|Q2FZU9|PPI1_STAA8	Putative peptidyl-prolyl cis-trans isomerase OS=Staphylococcus aureus (strain NCTC 8325) GN=SAOUHSC_00891 PE=3 SV=1
sp|Q2FZV7|Y878_STAA8 NADH dehydrogenase-like protein SAOUHSC_00878 OS=Staphylococcus aureus (strain NCTC 8325) GN=SAOUHSC_00878 PE=1 SV=1	sp|Q2FZV7|Y878_STAA8	NADH dehydrogenase-like protein SAOUHSC_00878 OS=Staphylococcus aureus (strain NCTC 8325) GN=SAOUHSC_00878 PE=1 SV=1
sp|Q2FZW4|DLTC_STAA8 D-alanine--poly(phosphoribitol) ligase subunit 2 OS=Staphylococcus aureus (strain NCTC 8325) GN=dltC PE=3 SV=1	sp|Q2FZW4|DLTC_STAA8	D-alanine--poly(phosphoribitol) ligase subunit 2 OS=Staphylococcus aureus (strain NCTC 8325) GN=dltC PE=3 SV=1
sp|Q2FZW6|DLTA_STAA8 D-alanine--poly(phosphoribitol) ligase subunit 1 OS=Staphylococcus aureus (strain NCTC 8325) GN=dltA PE=3 SV=1	sp|Q2FZW6|DLTA_STAA8	D-alanine--poly(phosphoribitol) ligase subunit 1 OS=Staphylococcus aureus (strain NCTC 8325) GN=dltA PE=3 SV=1
sp|Q2FZX0|NAGD_STAA8 Acid sugar phosphatase OS=Staphylococcus aureus (strain NCTC 8325) GN=nagD PE=3 SV=1	sp|Q2FZX0|NAGD_STAA8	Acid sugar phosphatase OS=Staphylococcus aureus (strain NCTC 8325) GN=nagD PE=3 SV=1
sp|Q2FZX4|LIPA_STAA8 Lipoyl synthase OS=Staphylococcus aureus (strain NCTC 8325) GN=lipA PE=3 SV=1	sp|Q2FZX4|LIPA_STAA8	Lipoyl synthase OS=Staphylococcus aureus (strain NCTC 8325) GN=lipA PE=3 SV=1
sp|Q2FZX9|2NPD_STAA8 Probable nitronate monooxygenase OS=Staphylococcus aureus (strain NCTC 8325) GN=SAOUHSC_00855 PE=3 SV=1	sp|Q2FZX9|2NPD_STAA8	Probable nitronate monooxygenase OS=Staphylococcus aureus (strain NCTC 8325) GN=SAOUHSC_00855 PE=3 SV=1
sp|Q2FZY3|Y851_STAA8 UPF0051 protein SAOUHSC_00851 OS=Staphylococcus aureus (strain NCTC 8325) GN=SAOUHSC_00851 PE=3 SV=1	sp|Q2FZY3|Y851_STAA8	UPF0051 protein SAOUHSC_00851 OS=Staphylococcus aureus (strain NCTC 8325) GN=SAOUHSC_00851 PE=3 SV=1
sp|Q2FZY9|Y845_STAA8 UPF0337 protein SAOUHSC_00845 OS=Staphylococcus aureus (strain NCTC 8325) GN=SAOUHSC_00845 PE=3 SV=1	sp|Q2FZY9|Y845_STAA8	UPF0337 protein SAOUHSC_00845 OS=Staphylococcus aureus (strain NCTC 8325) GN=SAOUHSC_00845 PE=3 SV=1
sp|Q2FZZ2|METN2_STAA8 Methionine import ATP-binding protein MetN 2 OS=Staphylococcus aureus (strain NCTC 8325) GN=metN2 PE=3 SV=1	sp|Q2FZZ2|METN2_STAA8	Methionine import ATP-binding protein MetN 2 OS=Staphylococcus aureus (strain NCTC 8325) GN=metN2 PE=3 SV=1
sp|Q2FZZ8|GCSH_STAA8 Glycine cleavage system H protein OS=Staphylococcus aureus (strain NCTC 8325) GN=gcvH PE=3 SV=1	sp|Q2FZZ8|GCSH_STAA8	Glycine cleavage system H protein OS=Staphylococcus aureus (strain NCTC 8325) GN=gcvH PE=3 SV=1
sp|Q2G015|CLFA_STAA8 Clumping factor A OS=Staphylococcus aureus (strain NCTC 8325) GN=clfA PE=1 SV=1	sp|Q2G015|CLFA_STAA8	Clumping factor A OS=Staphylococcus aureus (strain NCTC 8325) GN=clfA PE=1 SV=1
sp|Q2G028|ENO_STAA8 Enolase OS=Staphylococcus aureus (strain NCTC 8325) GN=eno PE=1 SV=1	sp|Q2G028|ENO_STAA8	Enolase OS=Staphylococcus aureus (strain NCTC 8325) GN=eno PE=1 SV=1
sp|Q2G030|TPIS_STAA8 Triosephosphate isomerase OS=Staphylococcus aureus (strain NCTC 8325) GN=tpiA PE=3 SV=1	sp|Q2G030|TPIS_STAA8	Triosephosphate isomerase OS=Staphylococcus aureus (strain NCTC 8325) GN=tpiA PE=3 SV=1
sp|Q2G031|PGK_STAA8 Phosphoglycerate kinase OS=Staphylococcus aureus (strain NCTC 8325) GN=pgk PE=3 SV=1	sp|Q2G031|PGK_STAA8	Phosphoglycerate kinase OS=Staphylococcus aureus (strain NCTC 8325) GN=pgk PE=3 SV=1
sp|Q2G035|Y792_STAA8 Epimerase family protein SAOUHSC_00792 OS=Staphylococcus aureus (strain NCTC 8325) GN=SAOUHSC_00792 PE=3 SV=1	sp|Q2G035|Y792_STAA8	Epimerase family protein SAOUHSC_00792 OS=Staphylococcus aureus (strain NCTC 8325) GN=SAOUHSC_00792 PE=3 SV=1
sp|Q2G036|CLPP_STAA8 ATP-dependent Clp protease proteolytic subunit OS=Staphylococcus aureus (strain NCTC 8325) GN=clpP PE=1 SV=1	sp|Q2G036|CLPP_STAA8	ATP-dependent Clp protease proteolytic subunit OS=Staphylococcus aureus (strain NCTC 8325) GN=clpP PE=1 SV=1
sp|Q2G037|WHIA_STAA8 Putative sporulation transcription regulator WhiA OS=Staphylococcus aureus (strain NCTC 8325) GN=whiA PE=3 SV=1	sp|Q2G037|WHIA_STAA8	Putative sporulation transcription regulator WhiA OS=Staphylococcus aureus (strain NCTC 8325) GN=whiA PE=3 SV=1
sp|Q2G039|Y787_STAA8 Nucleotide-binding protein SAOUHSC_00787 OS=Staphylococcus aureus (strain NCTC 8325) GN=SAOUHSC_00787 PE=3 SV=2	sp|Q2G039|Y787_STAA8	Nucleotide-binding protein SAOUHSC_00787 OS=Staphylococcus aureus (strain NCTC 8325) GN=SAOUHSC_00787 PE=3 SV=2
sp|Q2G044|LGT_STAA8 Prolipoprotein diacylglyceryl transferase OS=Staphylococcus aureus (strain NCTC 8325) GN=lgt PE=3 SV=1	sp|Q2G044|LGT_STAA8	Prolipoprotein diacylglyceryl transferase OS=Staphylococcus aureus (strain NCTC 8325) GN=lgt PE=3 SV=1
sp|Q2G045|HPRK_STAA8 HPr kinase/phosphorylase OS=Staphylococcus aureus (strain NCTC 8325) GN=hprK PE=3 SV=1	sp|Q2G045|HPRK_STAA8	HPr kinase/phosphorylase OS=Staphylococcus aureus (strain NCTC 8325) GN=hprK PE=3 SV=1
sp|Q2G055|HPF_STAA8 Ribosome hibernation promotion factor OS=Staphylococcus aureus (strain NCTC 8325) GN=hpf PE=1 SV=1	sp|Q2G055|HPF_STAA8	Ribosome hibernation promotion factor OS=Staphylococcus aureus (strain NCTC 8325) GN=hpf PE=1 SV=1
sp|Q2G064|PEPT_STAA8 Peptidase T OS=Staphylococcus aureus (strain NCTC 8325) GN=pepT PE=3 SV=1	sp|Q2G064|PEPT_STAA8	Peptidase T OS=Staphylococcus aureus (strain NCTC 8325) GN=pepT PE=3 SV=1
sp|Q2G069|MURB_STAA8 UDP-N-acetylenolpyruvoylglucosamine reductase OS=Staphylococcus aureus (strain NCTC 8325) GN=murB PE=3 SV=1	sp|Q2G069|MURB_STAA8	UDP-N-acetylenolpyruvoylglucosamine reductase OS=Staphylococcus aureus (strain NCTC 8325) GN=murB PE=3 SV=1
sp|Q2G079|NRDI_STAA8 Protein NrdI OS=Staphylococcus aureus (strain NCTC 8325) GN=nrdI PE=3 SV=1	sp|Q2G079|NRDI_STAA8	Protein NrdI OS=Staphylococcus aureus (strain NCTC 8325) GN=nrdI PE=3 SV=1
sp|Q2G081|QUEF_STAA8 NADPH-dependent 7-cyano-7-deazaguanine reductase OS=Staphylococcus aureus (strain NCTC 8325) GN=queF PE=3 SV=1	sp|Q2G081|QUEF_STAA8	NADPH-dependent 7-cyano-7-deazaguanine reductase OS=Staphylococcus aureus (strain NCTC 8325) GN=queF PE=3 SV=1
sp|Q2G084|Y736_STAA8 Putative lipid kinase SAOUHSC_00736 OS=Staphylococcus aureus (strain NCTC 8325) GN=SAOUHSC_00736 PE=3 SV=1	sp|Q2G084|Y736_STAA8	Putative lipid kinase SAOUHSC_00736 OS=Staphylococcus aureus (strain NCTC 8325) GN=SAOUHSC_00736 PE=3 SV=1
sp|Q2G093|LTAS_STAA8 Lipoteichoic acid synthase OS=Staphylococcus aureus (strain NCTC 8325) GN=ltaS PE=1 SV=1	sp|Q2G093|LTAS_STAA8	Lipoteichoic acid synthase OS=Staphylococcus aureus (strain NCTC 8325) GN=ltaS PE=1 SV=1
sp|Q2G0B1|MGRA_STAA8 HTH-type transcriptional regulator MgrA OS=Staphylococcus aureus (strain NCTC 8325) GN=mgrA PE=1 SV=3	sp|Q2G0B1|MGRA_STAA8	HTH-type transcriptional regulator MgrA OS=Staphylococcus aureus (strain NCTC 8325) GN=mgrA PE=1 SV=3
sp|Q2G0D0|Y675_STAA8 Probable transcriptional regulatory protein SAOUHSC_00675 OS=Staphylococcus aureus (strain NCTC 8325) GN=SAOUHSC_00675 PE=3 SV=1	sp|Q2G0D0|Y675_STAA8	Probable transcriptional regulatory protein SAOUHSC_00675 OS=Staphylococcus aureus (strain NCTC 8325) GN=SAOUHSC_00675 PE=3 SV=1
sp|Q2G0D1|SARX_STAA8 HTH-type transcriptional regulator SarX OS=Staphylococcus aureus (strain NCTC 8325) GN=sarX PE=1 SV=2	sp|Q2G0D1|SARX_STAA8	HTH-type transcriptional regulator SarX OS=Staphylococcus aureus (strain NCTC 8325) GN=sarX PE=1 SV=2
sp|Q2G0F8|SYR_STAA8 Arginine--tRNA ligase OS=Staphylococcus aureus (strain NCTC 8325) GN=argS PE=3 SV=1	sp|Q2G0F8|SYR_STAA8	Arginine--tRNA ligase OS=Staphylococcus aureus (strain NCTC 8325) GN=argS PE=3 SV=1
sp|Q2G0G1|ADH_STAA8 Alcohol dehydrogenase OS=Staphylococcus aureus (strain NCTC 8325) GN=adh PE=3 SV=1	sp|Q2G0G1|ADH_STAA8	Alcohol dehydrogenase OS=Staphylococcus aureus (strain NCTC 8325) GN=adh PE=3 SV=1
sp|Q2G0I5|Y580_STAA8 UPF0741 protein SAOUHSC_00580 OS=Staphylococcus aureus (strain NCTC 8325) GN=SAOUHSC_00580 PE=3 SV=1	sp|Q2G0I5|Y580_STAA8	UPF0741 protein SAOUHSC_00580 OS=Staphylococcus aureus (strain NCTC 8325) GN=SAOUHSC_00580 PE=3 SV=1
sp|Q2G0J1|Y573_STAA8 Putative heme-dependent peroxidase SAOUHSC_00573 OS=Staphylococcus aureus (strain NCTC 8325) GN=SAOUHSC_00573 PE=3 SV=1	sp|Q2G0J1|Y573_STAA8	Putative heme-dependent peroxidase SAOUHSC_00573 OS=Staphylococcus aureus (strain NCTC 8325) GN=SAOUHSC_00573 PE=3 SV=1
sp|Q2G0J7|UNG_STAA8 Uracil-DNA glycosylase OS=Staphylococcus aureus (strain NCTC 8325) GN=ung PE=3 SV=1	sp|Q2G0J7|UNG_STAA8	Uracil-DNA glycosylase OS=Staphylococcus aureus (strain NCTC 8325) GN=ung PE=3 SV=1
sp|Q2G0K7|HPS_STAA8 3-hexulose-6-phosphate synthase OS=Staphylococcus aureus (strain NCTC 8325) GN=SAOUHSC_00553 PE=3 SV=1	sp|Q2G0K7|HPS_STAA8	3-hexulose-6-phosphate synthase OS=Staphylococcus aureus (strain NCTC 8325) GN=SAOUHSC_00553 PE=3 SV=1
sp|Q2G0K8|NAGB_STAA8 Glucosamine-6-phosphate deaminase OS=Staphylococcus aureus (strain NCTC 8325) GN=nagB PE=3 SV=1	sp|Q2G0K8|NAGB_STAA8	Glucosamine-6-phosphate deaminase OS=Staphylococcus aureus (strain NCTC 8325) GN=nagB PE=3 SV=1
sp|Q2G0L1|GCH4_STAA8 GTP cyclohydrolase FolE2 OS=Staphylococcus aureus (strain NCTC 8325) GN=folE2 PE=3 SV=1	sp|Q2G0L1|GCH4_STAA8	GTP cyclohydrolase FolE2 OS=Staphylococcus aureus (strain NCTC 8325) GN=folE2 PE=3 SV=1
sp|Q2G0L4|SDRD_STAA8 Serine-aspartate repeat-containing protein D OS=Staphylococcus aureus (strain NCTC 8325) GN=sdrD PE=1 SV=1	sp|Q2G0L4|SDRD_STAA8	Serine-aspartate repeat-containing protein D OS=Staphylococcus aureus (strain NCTC 8325) GN=sdrD PE=1 SV=1
[truncated: 817 more rows]
